# Supplementary material
Source: PubMed Central journal article supplement (PMC6552295)
Supplement: jamapsychiatry-e190020-s001.pdf [file jamapsychiatry-e190020-s001.pdf]

## Supplementary Online Content

Pornpattananangkul N, Leibenluft E, Pine DS, Stringaris A. Association between large-scale resting-state and task-evoked networks with anhedonia in children. *JAMA Psychiatry*. Published online March 13, 2019. doi:10.1001/jamapsychiatry.2019.0020

**eTable 1.** Demographics of participants who passed the quality control for resting-state fMRI (2455 children)

**eTable 2.** Group differences between children with vs. without anhedonia in the resting-state fMRI connectivity z[r]

**eTable 3.** Group differences between children with vs. without low mood in the resting-state fMRI connectivity z[r]

**eTable 4.** Group differences between children with vs. without Anxiety in the resting-state fMRI connectivity z[r]

**eTable 5.** Group differences between children with vs. without ADHD in the resting-state fMRI connectivity z[r]

**eTable 6.** Group differences between children with vs. without anhedonia during reward anticipation [Large Reward > Neutral Cue] in the MID task-fMRI activation

**eTable 7.** Group differences between children with vs. without low mood during reward anticipation [Large Reward > Neutral Cue] in the MID task-fMRI activation

**eTable 8.** Group differences between children with vs. without anxiety during reward anticipation [Large Reward > Neutral Cue] in the MID task-fMRI activation

**eTable 9.** Group differences between children with vs. without ADHD during reward anticipation [Large Reward > Neutral Cue] in the MID task-fMRI activation

**eTable 10.** Group differences between children with vs. without anhedonia during working-memory [Two-Back > Zero-Back] in the N-Back task-fMRI activation

**eTable 11.** Group differences between children with vs. without low mood during working-memory [Two-Back > Zero-Back] in the N-Back task-fMRI activation

**eTable 12.** Group differences between children with vs. without anxiety during working-memory [Two-Back > Zero-Back] in the N-Back task-fMRI activation

**eTable 13.** Group differences between children with vs. without ADHD during working-memory [Two-Back > Zero-Back] in the N-Back task-fMRI activation

**eTable 14.** Group differences between anhedonia and low-mood during reward-anticipation [Large Reward > Neutral Cue] in the MID task-fMRI activation

**eTable 15.** Group differences between anhedonia and anxiety during reward-anticipation [Large Reward > Neutral Cue] in the MID task-fMRI activation

**eTable 16.** Group differences between anhedonia and ADHD during reward-anticipation [Large Reward > Neutral Cue] in the MID task-fMRI activation

**eTable 17.** Follow-up Analysis

**eReferences.**

This supplementary material has been provided by the authors to give readers additional information about their work.

**eTable 1.** Demographics of participants who passed the quality control for resting-state fMRI (2455 children)

|                                                          | Anhedonia | No Anhedonia | Low Mood | No Low Mood | Anxiety | No Anxiety | ADHD  | No ADHD |
|----------------------------------------------------------|-----------|--------------|----------|-------------|---------|------------|-------|---------|
| sample size                                              | 215       | 2222         | 241      | 2196        | 93      | 2344       | 397   | 2025    |
| % of females                                             | 46.5      | 48.3         | 49       | 48.1        | 47.3    | 48.2       | 35    | 50.5    |
| mean age in years                                        | 10        | 10.05        | 10.05    | 10.04       | 10.05   | 10.04      | 10.05 | 10.04   |
| SD age in years                                          | .64       | .62          | .62      | .62         | .64     | .62        | .63   | .62     |
| % of females in each pubertal category*                  |           |              |          |             |         |            |       |         |
| prepubertal                                              | 26        | 30.4         | 25.4     | 30.5        | 24      | 30.2       | 32.4  | 29.5    |
| early pubertal                                           | 18        | 25.3         | 17.8     | 25.5        | 34.1    | 24.3       | 21.6  | 25.2    |
| mid pubertal                                             | 45        | 39.9         | 47.5     | 39.6        | 40.9    | 40.4       | 43.2  | 40      |
| late pubertal                                            | 5         | 2.05         | 5.08     | 1.99        | 0       | 2.39       | 2.16  | 2.35    |
| postpubertal                                             | 0         | 0            | 0        | 0           | 0       | 0          | 0     | 0       |
| NA                                                       | 6         | 2.33         | 4.24     | 2.46        | 0       | 2.74       | 0.72  | 2.94    |
| % of males in each pubertal category*                    |           |              |          |             |         |            |       |         |
| prepubertal                                              | 69.6      | 72.1         | 65.9     | 72.5        | 73.5    | 71.8       | 70.2  | 72.5    |
| early pubertal                                           | 22.6      | 22           | 28.5     | 21.3        | 18.4    | 22.2       | 22.5  | 21.8    |
| mid pubertal                                             | 5.22      | 3.66         | 4.07     | 3.77        | 6.12    | 3.71       | 5.43  | 3.29    |
| late pubertal                                            | .87       | 0.26         | 0        | 0.35        | 0       | 0.329      | 0.39  | 0.29    |
| postpubertal                                             | 0         | 0            | 0        | 0           | 0       | 0          | 0     | 0       |
| NA                                                       | 1.74      | 2.00         | 1.63     | 2.02        | 2.04    | 1.98       | 1.55  | 2.09    |
| % of participants with KSADS-5 diagnosis                 |           |              |          |             |         |            |       |         |
| internalizing disorders                                  |           |              |          |             |         |            |       |         |
| major depressive                                         | 15.8      | 1.4          | 14.9     | 1.32        | 20.4    | 1.96       | 5.29  | 2.17    |
| Social/generalize anxiety**                              | 11.6      | 3.06         | 9.54     | 3.19        | 100     | 0          | 6.30  | 3.31    |
| externalizing disorders                                  |           |              |          |             |         |            |       |         |
| ADHD                                                     | 19.5      | 16           | 24.5     | 15.4        | 26.9    | 15.9       | 100   | 0       |
| conduct                                                  | 5.58      | 2.25         | 2.49     | 2.55        | 3.23    | 2.52       | 9.07  | 1.28    |
| % of participants currently taking psychotropic medicine |           |              |          |             |         |            |       |         |
| any psychotropic                                         | 10.2      | 6.93         | 7.47     | 7.19        | 18.3    | 6.78       | 24.9  | 3.6     |
| SRI                                                      | 0.93      | 0.95         | 1.24     | 0.91        | 5.38    | 0.77       | 3.02  | 0.49    |
| Non-SRI antidepressant                                   | 0         | 0.05         | 0        | 0.05        | 0       | 0.04       | 0.25  | 0       |
| SNRI                                                     | 0         | 0            | 0        | 0           | 0       | 0          | 0     | 0       |
| Tetracyclic                                              | 0         | 0            | 0        | 0           | 0       | 0          | 0     | 0       |
| MAOI                                                     | 0         | 0            | 0        | 0           | 0       | 0          | 0     | 0       |
| Tricyclic                                                | 0.47      | 0.05         | 0        | 0.09        | 0       | 0.09       | 0.25  | 0.05    |
| Benzodiazepines                                          | 0         | 0.05         | 0        | 0.05        | 0       | 0.04       | 0     | 0.05    |
| other anxiety med.                                       | 0         | 0.09         | 0        | 0.09        | 0       | 0.09       | 0.25  | 0.05    |
| stimulant                                                | 8.37      | 5.18         | 5.81     | 5.42        | 12.9    | 5.16       | 19.6  | 2.57    |
| non-stimulant ADHD med.                                  | 0.47      | 1.80         | 1.66     | 1.68        | 2.15    | 1.66       | 6.55  | 0.69    |
| anticonvulsant                                           | 0.47      | 0.23         | 0        | 0.27        | 0       | 0.26       | 0.25  | 0.25    |
| Lithium                                                  | 0         | 0.05         | 0        | 0.05        | 0       | 0.04       | 0     | .05     |
| atypical antipsychotic                                   | 0.47      | 0.4          | 0        | 0.46        | 1.08    | 0.38       | 1.76  | 0.15    |
| typical antipsychotic                                    | 0         | 0            | 0        | 0           | 0       | 0          | 0     | 0       |

Note. \*Pubertal category is based on Petersen et al. (1988)1. \*\*The ABCD study only included the social anxiety disorder and generalized anxiety disorder in the anxiety disorder section of self-report KSADS-5.

**eTable 2.** Group differences between children with vs. without anhedonia in the resting-state fMRI connectivity  $z[r]$

| Name                             | $p$          | $q_{FDR}$    | $t$         | $\ln(BF_{10})$ | With Anhedonia<br>$M(SD)$ | Without Anhedonia<br>$M(SD)$ |
|----------------------------------|--------------|--------------|-------------|----------------|---------------------------|------------------------------|
| AuditoryLeftCerebellum           | 0.052        | 0.329        | 1.947       | -0.644         | -0.101(.121)              | -0.084(.123)                 |
| AuditoryLeftThalamus             | 0.475        | 0.82         | 0.715       | -2.239         | -0.051(.105)              | -0.045(.110)                 |
| AuditoryLeftCaudate              | 0.737        | 0.91         | -0.336      | -2.438         | -0.020(.159)              | -0.024(.158)                 |
| AuditoryLeftPutamen              | 0.222        | 0.634        | -1.222      | -1.764         | -0.061(.097)              | -0.070(.099)                 |
| AuditoryLeftPallidum             | 0.686        | 0.904        | 0.405       | -2.416         | -0.025(.095)              | -0.022(.094)                 |
| AuditoryBrainStem                | 0.974        | 0.994        | 0.033       | -2.493         | -0.003(.093)              | -0.003(.101)                 |
| AuditoryLeftHippocampus          | 0.042        | 0.3          | -2.034      | -0.469         | -0.027(.056)              | -0.035(.057)                 |
| AuditoryLeftAmygdala             | 0.028        | 0.264        | -2.203      | -0.119         | -0.038(.126)              | -0.061(.139)                 |
| AuditoryLeftAccumbens            | 0.524        | 0.849        | 0.637       | -2.293         | -0.070(.115)              | -0.065(.116)                 |
| AuditoryLeftVentraldc            | 0.23         | 0.642        | 1.202       | -1.787         | -0.055(.155)              | -0.041(.160)                 |
| AuditoryRightCerebellum          | 0.282        | 0.669        | 1.076       | -1.933         | -0.049(.151)              | -0.037(.152)                 |
| AuditoryRightThalamus            | 0.554        | 0.857        | 0.593       | -2.326         | -0.104(.098)              | -0.100(.095)                 |
| AuditoryRightCaudate             | 0.555        | 0.857        | -0.59       | -2.323         | -0.038(.139)              | -0.044(.126)                 |
| AuditoryRightPutamen             | 0.013        | 0.197        | 2.491       | 0.528          | 0.112(.145)               | 0.137(.137)                  |
| AuditoryRightPallidum            | 0.038        | 0.3          | 2.075       | -0.386         | 0.142(.102)               | 0.158(.104)                  |
| AuditoryRightHippocampus         | 0.515        | 0.849        | -0.651      | -2.279         | 0.044(.161)               | 0.036(.157)                  |
| AuditoryRightAmygdala            | 0.149        | 0.503        | -1.442      | -1.474         | -0.013(.098)              | -0.023(.096)                 |
| AuditoryRightAccumbens           | 0.826        | 0.939        | 0.22        | -2.468         | -0.020(.093)              | -0.018(.091)                 |
| AuditoryRightVentraldc           | 0.414        | 0.769        | -0.818      | -2.166         | -0.060(.091)              | -0.065(.087)                 |
| CinguloOpercularLeftCerebellum   | 0.543        | 0.857        | 0.608       | -2.312         | 0.003(.052)               | 0.006(.055)                  |
| CinguloOpercularLeftThalamus     | 0.783        | 0.914        | -0.276      | -2.467         | 0.069(.139)               | 0.067(.133)                  |
| CinguloOpercularLeftCaudate      | 0.317        | 0.697        | 1.002       | -2.015         | 0.016(.127)               | 0.025(.119)                  |
| CinguloOpercularLeftPutamen      | 0.94         | 0.994        | 0.076       | -2.484         | 0.105(.162)               | 0.106(.163)                  |
| CinguloOpercularLeftPallidum     | 0.961        | 0.994        | -0.049      | -2.492         | 0.142(.151)               | 0.142(.149)                  |
| <b>CinguloOpercularBrainStem</b> | <b>0.006</b> | <b>0.167</b> | <b>2.75</b> | <b>1.204</b>   | <b>0.005(.102)</b>        | <b>0.026(.101)</b>           |
| CinguloOpercularLeftHippocampus  | 0.237        | 0.642        | 1.183       | -1.799         | -0.022(.117)              | -0.012(.114)                 |
| CinguloOpercularLeftAmygdala     | 0.029        | 0.264        | 2.192       | -0.145         | 0.038(.122)               | 0.058(.120)                  |
| CinguloOpercularLeftAccumbens    | 0.016        | 0.197        | 2.41        | 0.352          | 0.084(.097)               | 0.102(.104)                  |
| CinguloOpercularLeftVentraldc    | 0.431        | 0.785        | -0.787      | -2.19          | -0.063(.163)              | -0.073(.160)                 |
| CinguloOpercularRightCerebellum  | 0.216        | 0.626        | -1.238      | -1.734         | 0.098(.099)               | 0.089(.097)                  |
| CinguloOpercularRightThalamus    | 0.364        | 0.71         | 0.908       | -2.092         | -0.050(.096)              | -0.044(.091)                 |
| CinguloOpercularRightCaudate     | 0.97         | 0.994        | -0.038      | -2.5           | 0.061(.100)               | 0.061(.093)                  |

|                                     |              |               |              |              |                    |                     |
|-------------------------------------|--------------|---------------|--------------|--------------|--------------------|---------------------|
| CinguloOpercularRightPutamen        | 0.276        | 0.668         | 1.089        | -1.899       | 0.047(.054)        | 0.052(.055)         |
| CinguloOpercularRightPallidum       | 0.699        | 0.906         | -0.387       | -2.42        | -0.068(.124)       | -0.071(.129)        |
| CinguloOpercularRightHippocampus    | 0.02         | 0.219         | 2.328        | 0.162        | -0.035(.109)       | -0.016(.113)        |
| CinguloOpercularRightAmygdala       | 0.143        | 0.503         | 1.463        | -1.434       | -0.051(.150)       | -0.035(.147)        |
| CinguloOpercularRightAccumbens      | 0.455        | 0.812         | 0.747        | -2.217       | 0.240(.143)        | 0.248(.143)         |
| CinguloOpercularRightVentraldc      | 0.009        | 0.187         | 2.631        | 0.898        | 0.107(.096)        | 0.126(.100)         |
| CinguloParietalLeftCerebellum       | 0.391        | 0.739         | 0.858        | -2.138       | -0.174(.130)       | -0.166(.121)        |
| CinguloParietalLeftThalamus         | 0.194        | 0.582         | 1.301        | -1.668       | 0.202(.124)        | 0.214(.124)         |
| CinguloParietalLeftCaudate          | 0.49         | 0.82          | 0.69         | -2.268       | 0.249(.106)        | 0.254(.104)         |
| CinguloParietalLeftPutamen          | 0.464        | 0.815         | 0.733        | -2.224       | -0.069(.158)       | -0.060(.149)        |
| CinguloParietalLeftPallidum         | 0.947        | 0.994         | -0.066       | -2.49        | -0.026(.102)       | -0.027(.099)        |
| <b>CinguloParietalBrainStem</b>     | <b>0.001</b> | <b>0.045*</b> | <b>-3.46</b> | <b>3.366</b> | <b>0.023(.095)</b> | <b>-0.001(.091)</b> |
| CinguloParietalLeftHippocampus      | 0.322        | 0.7           | -0.99        | -2.012       | -0.013(.089)       | -0.019(.087)        |
| CinguloParietalLeftAmygdala         | 0.418        | 0.77          | 0.811        | -2.168       | 0.011(.055)        | 0.015(.056)         |
| CinguloParietalLeftAccumbens        | 0.792        | 0.914         | -0.264       | -2.45        | -0.045(.128)       | -0.047(.135)        |
| CinguloParietalLeftVentraldc        | 0.042        | 0.3           | 2.037        | -0.465       | 0.078(.105)        | 0.094(.105)         |
| CinguloParietalRightCerebellum      | 0.143        | 0.503         | 1.466        | -1.448       | 0.134(.173)        | 0.151(.155)         |
| CinguloParietalRightThalamus        | 0.714        | 0.907         | 0.366        | -2.421       | 0.180(.154)        | 0.184(.152)         |
| CinguloParietalRightCaudate         | 0.012        | 0.197         | 2.529        | 0.628        | 0.069(.103)        | 0.089(.104)         |
| CinguloParietalRightPutamen         | 0.153        | 0.503         | -1.428       | -1.49        | -0.079(.123)       | -0.091(.115)        |
| <b>CinguloParietalRightPallidum</b> | <b>0.003</b> | <b>0.086</b>  | <b>3.024</b> | <b>1.974</b> | <b>0.101(.132)</b> | <b>0.127(.119)</b>  |
| CinguloParietalRightHippocampus     | 0.046        | 0.317         | 2            | -0.537       | 0.139(.100)        | 0.154(.103)         |
| CinguloParietalRightAmygdala        | 0.34         | 0.708         | -0.954       | -2.051       | -0.037(.142)       | -0.047(.143)        |
| CinguloParietalRightAccumbens       | 0.672        | 0.904         | 0.423        | -2.399       | -0.004(.087)       | -0.001(.095)        |
| CinguloParietalRightVentraldc       | 0.738        | 0.91          | -0.334       | -2.432       | -0.020(.085)       | -0.022(.087)        |
| DefaultLeftCerebellum               | 0.311        | 0.697         | 1.014        | -1.983       | -0.012(.080)       | -0.006(.083)        |
| DefaultLeftThalamus                 | 0.129        | 0.501         | 1.517        | -1.36        | 0.009(.055)        | 0.015(.054)         |
| DefaultLeftCaudate                  | 0.139        | 0.503         | -1.48        | -1.428       | -0.044(.131)       | -0.059(.135)        |
| DefaultLeftPutamen                  | 0.662        | 0.904         | 0.437        | -2.393       | 0.026(.101)        | 0.030(.099)         |
| DefaultLeftPallidum                 | 0.765        | 0.91          | 0.299        | -2.452       | 0.113(.174)        | 0.116(.158)         |

|                                       |          |               |               |             |                     |                     |
|---------------------------------------|----------|---------------|---------------|-------------|---------------------|---------------------|
| DefaultBrainStem                      | 0.81     | 0.928         | -0.241        | -2.469      | 0.141(.150)         | 0.139(.142)         |
| DefaultLeftHippocampus                | 0.008    | 0.187         | 2.671         | 1.005       | 0.050(.093)         | 0.068(.092)         |
| DefaultLeftAmygdala                   | 0.887    | 0.965         | -0.142        | -2.472      | -0.077(.111)        | -0.078(.113)        |
| DefaultLeftAccumbens                  | 0.155    | 0.503         | 1.424         | -1.51       | 0.062(.128)         | 0.074(.117)         |
| DefaultLeftVentraldc                  | 0.026    | 0.262         | 2.233         | -0.05       | 0.048(.099)         | 0.066(.103)         |
| DefaultRightCerebellum                | 0.25     | 0.653         | -1.152        | -1.848      | 0.032(.156)         | 0.019(.151)         |
| DefaultRightThalamus                  | 0.942    | 0.994         | 0.073         | -2.486      | -0.021(.095)        | -0.020(.091)        |
| DefaultRightCaudate                   | 0.104    | 0.456         | 1.625         | -1.194      | -0.049(.086)        | -0.039(.084)        |
| DefaultRightPutamen                   | 0.378    | 0.725         | 0.882         | -2.101      | -0.049(.087)        | -0.044(.084)        |
| DefaultRightPallidum                  | 0.575    | 0.859         | 0.56          | -2.333      | 0.005(.064)         | 0.008(.062)         |
| DefaultRightHippocampus               | 0.149    | 0.503         | 1.444         | -1.455      | 0.056(.131)         | 0.070(.129)         |
| DefaultRightAmygdala                  | 0.692    | 0.904         | -0.397        | -2.412      | -0.019(.105)        | -0.022(.103)        |
| DefaultRightAccumbens                 | 0.112    | 0.464         | -1.592        | -1.249      | 0.095(.156)         | 0.076(.167)         |
| DefaultRightVentraldc                 | 0.994    | 0.997         | -0.008        | -2.496      | 0.074(.161)         | 0.074(.149)         |
| DorsalAttentionLeftCerebellum         | 0.974    | 0.994         | 0.032         | -2.484      | -0.015(.088)        | -0.015(.096)        |
| DorsalAttentionLeftThalamus           | 0.708    | 0.906         | -0.375        | -2.401      | -0.004(.104)        | -0.007(.111)        |
| DorsalAttentionLeftCaudate            | 0.193    | 0.582         | 1.302         | -1.659      | 0.035(.110)         | 0.046(.110)         |
| DorsalAttentionLeftPutamen            | 0.708    | 0.906         | -0.375        | -2.438      | -0.079(.118)        | -0.082(.113)        |
| DorsalAttentionLeftPallidum           | 0.053    | 0.332         | 1.934         | -0.66       | -0.014(.167)        | 0.010(.166)         |
| DorsalAttentionBrainStem              | 0.127    | 0.5           | 1.525         | -1.359      | 0.120(.110)         | 0.133(.109)         |
| <b>DorsalAttentionLeftHippocampus</b> | <b>0</b> | <b>0.027*</b> | <b>-3.931</b> | <b>5.06</b> | <b>-0.101(.096)</b> | <b>-0.129(.095)</b> |
| DorsalAttentionLeftAmygdala           | 0.097    | 0.445         | -1.658        | -1.147      | -0.053(.079)        | -0.064(.090)        |
| DorsalAttentionLeftAccumbens          | 0.018    | 0.207         | 2.376         | 0.263       | 0.131(.060)         | 0.142(.061)         |
| DorsalAttentionLeftVentraldc          | 0.012    | 0.197         | 2.501         | 0.562       | 0.258(.153)         | 0.286(.150)         |
| DorsalAttentionRightCerebellum        | 0.482    | 0.82          | 0.704         | -2.244      | -0.006(.099)        | -0.001(.099)        |
| DorsalAttentionRightThalamus          | 0.759    | 0.91          | 0.307         | -2.454      | -0.017(.151)        | -0.013(.142)        |
| DorsalAttentionRightCaudate           | 0.484    | 0.82          | 0.701         | -2.251      | 0.012(.145)         | 0.020(.155)         |
| DorsalAttentionRightPutamen           | 0.225    | 0.639         | 1.212         | -1.771      | 0.035(.093)         | 0.044(.096)         |
| DorsalAttentionRightPallidum          | 0.314    | 0.697         | 1.007         | -1.992      | -0.068(.121)        | -0.059(.116)        |
| DorsalAttentionRightHippocampus       | 0.851    | 0.953         | 0.188         | -2.467      | 0.058(.098)         | 0.060(.106)         |
| DorsalAttentionRightAmygdala          | 0.425    | 0.778         | -0.798        | -2.182      | -0.004(.090)        | -0.010(.104)        |
| DorsalAttentionRightAccumbens         | 0.183    | 0.571         | 1.332         | -1.622      | -0.092(.149)        | -0.078(.145)        |
| DorsalAttentionRightVentraldc         | 0.031    | 0.266         | 2.154         | -0.223      | 0.028(.082)         | 0.042(.089)         |

|                                             |              |              |              |              |                    |                    |
|---------------------------------------------|--------------|--------------|--------------|--------------|--------------------|--------------------|
| FrontoParietalLeftCerebellum                | 0.982        | 0.997        | -0.023       | -2.495       | -0.056(.084)       | -0.056(.085)       |
| FrontoParietalLeftThalamus                  | 0.042        | 0.3          | 2.039        | -0.45        | -0.075(.078)       | -0.062(.085)       |
| FrontoParietalLeftCaudate                   | 0.136        | 0.503        | 1.492        | -1.408       | 0.081(.063)        | 0.088(.059)        |
| FrontoParietalLeftPutamen                   | 0.141        | 0.503        | 1.474        | -1.434       | 0.097(.132)        | 0.112(.133)        |
| FrontoParietalLeftPallidum                  | 0.364        | 0.71         | -0.908       | -2.091       | 0.022(.096)        | 0.016(.093)        |
| FrontoParietalBrainStem                     | 0.381        | 0.725        | -0.876       | -2.119       | 0.051(.146)        | 0.041(.143)        |
| FrontoParietalLeftHippocampus               | 0.835        | 0.941        | -0.208       | -2.47        | -0.029(.144)       | -0.031(.148)       |
| FrontoParietalLeftAmygdala                  | 0.116        | 0.473        | 1.573        | -1.276       | 0.055(.093)        | 0.066(.092)        |
| FrontoParietalLeftAccumbens                 | 0.77         | 0.91         | 0.292        | -2.442       | -0.053(.107)       | -0.051(.107)       |
| FrontoParietalLeftVentraldc                 | 0.02         | 0.219        | 2.333        | 0.187        | 0.003(.097)        | 0.020(.098)        |
| FrontoParietalRightCerebellum               | 0.144        | 0.503        | 1.46         | -1.436       | -0.012(.092)       | -0.002(.096)       |
| FrontoParietalRightThalamus                 | 0.253        | 0.655        | 1.144        | -1.85        | 0.011(.160)        | 0.023(.147)        |
| FrontoParietalRightCaudate                  | 0.573        | 0.859        | 0.564        | -2.347       | 0.086(.096)        | 0.090(.096)        |
| FrontoParietalRightPutamen                  | 0.649        | 0.904        | -0.456       | -2.397       | -0.070(.088)       | -0.073(.086)       |
| FrontoParietalRightPallidum                 | 0.096        | 0.445        | -1.666       | -1.117       | -0.019(.081)       | -0.029(.083)       |
| FrontoParietalRightHippocampus              | 0.182        | 0.571        | 1.336        | -1.616       | 0.059(.056)        | 0.064(.057)        |
| FrontoParietalRightAmygdala                 | 0.598        | 0.877        | 0.527        | -2.363       | 0.059(.118)        | 0.064(.127)        |
| FrontoParietalRightAccumbens                | 0.041        | 0.3          | 2.043        | -0.449       | -0.016(.097)       | -0.003(.090)       |
| FrontoParietalRightVentraldc                | 0.016        | 0.197        | 2.422        | 0.398        | -0.053(.139)       | -0.029(.129)       |
| RetrosplenialTemporalLeftCerebellum         | 0.512        | 0.849        | -0.655       | -2.277       | -0.016(.094)       | -0.021(.103)       |
| RetrosplenialTemporalLeftThalamus           | 0.145        | 0.503        | 1.457        | -1.459       | -0.058(.096)       | -0.048(.093)       |
| RetrosplenialTemporalLeftCaudate            | 0.66         | 0.904        | 0.44         | -2.397       | -0.037(.094)       | -0.034(.095)       |
| RetrosplenialTemporalLeftPutamen            | 0.198        | 0.582        | -1.288       | -1.681       | -0.016(.059)       | -0.021(.058)       |
| RetrosplenialTemporalLeftPallidum           | 0.274        | 0.668        | -1.094       | -1.899       | -0.070(.126)       | -0.081(.137)       |
| RetrosplenialTemporalBrainStem              | 0.524        | 0.849        | 0.638        | -2.295       | -0.057(.107)       | -0.052(.113)       |
| RetrosplenialTemporalLeftHippocampus        | 0.886        | 0.965        | -0.143       | -2.474       | -0.058(.170)       | -0.059(.160)       |
| RetrosplenialTemporalLeftAmygdala           | 0.596        | 0.877        | -0.53        | -2.364       | -0.051(.165)       | -0.057(.149)       |
| RetrosplenialTemporalLeftAccumbens          | 0.968        | 0.994        | -0.04        | -2.491       | -0.063(.091)       | -0.064(.099)       |
| RetrosplenialTemporalLeftVentraldc          | 0.877        | 0.965        | 0.154        | -2.471       | -0.101(.120)       | -0.099(.127)       |
| <b>RetrosplenialTemporalRightCerebellum</b> | <b>0.002</b> | <b>0.079</b> | <b>3.084</b> | <b>2.151</b> | <b>0.097(.127)</b> | <b>0.127(.136)</b> |

|                                              |              |              |              |              |                    |                    |
|----------------------------------------------|--------------|--------------|--------------|--------------|--------------------|--------------------|
| RetrosplenialTemporalRight<br>Thalamus       | 0.01         | 0.197        | 2.561        | 0.706        | 0.136(.118)        | 0.157(.107)        |
| RetrosplenialTemporalRight<br>Caudate        | 0.233        | 0.642        | 1.193        | -1.797       | 0.043(.164)        | 0.057(.157)        |
| RetrosplenialTemporalRight<br>Putamen        | 0.914        | 0.978        | -0.108       | -2.484       | -0.025(.101)       | -0.026(.100)       |
| RetrosplenialTemporalRight<br>Pallidum       | 0.689        | 0.904        | 0.401        | -2.419       | -0.024(.095)       | -0.021(.092)       |
| RetrosplenialTemporalRight<br>Hippocampus    | 0.985        | 0.997        | -0.018       | -2.487       | -0.037(.091)       | -0.037(.091)       |
| RetrosplenialTemporalRight<br>Amygdala       | 0.539        | 0.855        | 0.614        | -2.309       | 0.003(.053)        | 0.006(.057)        |
| RetrosplenialTemporalRight<br>Accumbens      | 0.327        | 0.7          | 0.981        | -2.033       | 0.081(.137)        | 0.091(.134)        |
| RetrosplenialTemporalRight<br>Ventraldc      | 0.047        | 0.319        | 1.989        | -0.562       | 0.004(.122)        | 0.022(.120)        |
| SensorimotorHandLeftCere<br>bellum           | 0.895        | 0.968        | -0.131       | -2.488       | 0.099(.171)        | 0.098(.166)        |
| SensorimotorHandLeftThala<br>mus             | 0.641        | 0.899        | 0.467        | -2.384       | 0.145(.141)        | 0.150(.143)        |
| SensorimotorHandLeftCaud<br>ate              | 0.29         | 0.678        | 1.058        | -1.941       | -0.012(.103)       | -0.004(.105)       |
| SensorimotorHandLeftPut<br>amen              | 0.489        | 0.82         | 0.693        | -2.256       | -0.013(.127)       | -0.006(.118)       |
| SensorimotorHandLeftPalli<br>dum             | 0.031        | 0.266        | 2.164        | -0.2         | 0.035(.127)        | 0.055(.124)        |
| <b>SensorimotorHandBrainSte<br/>m</b>        | <b>0.001</b> | <b>0.051</b> | <b>3.304</b> | <b>2.854</b> | <b>0.084(.096)</b> | <b>0.110(.106)</b> |
| SensorimotorHandLeftHipp<br>ocampus          | 0.529        | 0.849        | -0.63        | -2.306       | -0.046(.162)       | -0.053(.159)       |
| SensorimotorHandLeftAmy<br>gdala             | 0.783        | 0.914        | -0.275       | -2.445       | 0.074(.102)        | 0.072(.096)        |
| SensorimotorHandLeftAccu<br>mbens            | 0.356        | 0.71         | -0.924       | -2.064       | -0.035(.093)       | -0.041(.090)       |
| SensorimotorHandLeftVentr<br>aldc            | 0.764        | 0.91         | -0.3         | -2.429       | 0.084(.092)        | 0.082(.089)        |
| SensorimotorHandRightCer<br>ebellum          | 0.525        | 0.849        | 0.635        | -2.29        | 0.045(.055)        | 0.048(.058)        |
| SensorimotorHandRightThal<br>amus            | 0.042        | 0.3          | -2.038       | -0.454       | -0.055(.120)       | -0.075(.132)       |
| SensorimotorHandRightCau<br>date             | 0.274        | 0.668        | 1.095        | -1.903       | -0.033(.123)       | -0.024(.116)       |
| SensorimotorHandRightPut<br>amen             | 0.112        | 0.464        | 1.589        | -1.252       | -0.049(.155)       | -0.032(.151)       |
| SensorimotorHandRightPalli<br>dum            | 0.095        | 0.445        | 1.671        | -1.126       | 0.236(.146)        | 0.254(.146)        |
| <b>SensorimotorHandRightHip<br/>pocampus</b> | <b>0.003</b> | <b>0.094</b> | <b>2.965</b> | <b>1.809</b> | <b>0.078(.097)</b> | <b>0.099(.099)</b> |
| SensorimotorHandRightAm<br>ygda              | 0.706        | 0.906        | -0.377       | -2.411       | -0.156(.127)       | -0.159(.123)       |

|                                   |       |       |        |        |              |              |
|-----------------------------------|-------|-------|--------|--------|--------------|--------------|
| SensorimotorHandRightAccumbens    | 0.103 | 0.456 | 1.63   | -1.204 | 0.200(.129)  | 0.215(.126)  |
| SensorimotorHandRightVentraldc    | 0.466 | 0.815 | 0.729  | -2.243 | 0.253(.108)  | 0.259(.107)  |
| SensorimotorMouthLeftCerebellum   | 0.36  | 0.71  | 0.916  | -2.079 | -0.066(.144) | -0.056(.146) |
| SensorimotorMouthLeftThalamus     | 0.359 | 0.71  | 0.918  | -2.079 | -0.041(.106) | -0.034(.099) |
| SensorimotorMouthLeftCaudate      | 0.079 | 0.415 | -1.756 | -0.981 | 0.017(.089)  | 0.006(.086)  |
| SensorimotorMouthLeftPutamen      | 0.469 | 0.816 | 0.723  | -2.223 | -0.018(.086) | -0.013(.082) |
| SensorimotorMouthLeftPallidum     | 0.354 | 0.71  | 0.927  | -2.07  | 0.008(.055)  | 0.012(.057)  |
| SensorimotorMouthBrainStem        | 0.217 | 0.626 | -1.235 | -1.755 | -0.039(.128) | -0.051(.134) |
| SensorimotorMouthLeftHippocampus  | 0.06  | 0.353 | 1.88   | -0.754 | 0.075(.103)  | 0.090(.103)  |
| SensorimotorMouthLeftAmygdala     | 0.136 | 0.503 | 1.491  | -1.401 | 0.149(.156)  | 0.166(.152)  |
| SensorimotorMouthLeftAccumbens    | 0.773 | 0.91  | 0.288  | -2.467 | 0.181(.166)  | 0.184(.150)  |
| SensorimotorMouthLeftVentraldc    | 0.008 | 0.187 | 2.644  | 0.92   | 0.060(.102)  | 0.080(.102)  |
| SensorimotorMouthRightCerebellum  | 0.108 | 0.46  | -1.607 | -1.212 | -0.064(.116) | -0.077(.114) |
| SensorimotorMouthRightThalamus    | 0.675 | 0.904 | 0.419  | -2.417 | 0.090(.113)  | 0.094(.117)  |
| SensorimotorMouthRightCaudate     | 0.079 | 0.415 | 1.756  | -0.993 | 0.133(.102)  | 0.147(.105)  |
| SensorimotorMouthRightPutamen     | 0.574 | 0.859 | -0.563 | -2.329 | -0.017(.138) | -0.023(.142) |
| SensorimotorMouthRightPallidum    | 0.551 | 0.857 | 0.597  | -2.316 | -0.028(.091) | -0.023(.093) |
| SensorimotorMouthRightHippocampus | 0.282 | 0.669 | -1.077 | -1.921 | -0.001(.093) | -0.008(.085) |
| SensorimotorMouthRightAmygdala    | 0.266 | 0.668 | -1.113 | -1.875 | 0.012(.082)  | 0.004(.085)  |
| SensorimotorMouthRightAccumbens   | 0.152 | 0.503 | 1.432  | -1.476 | -0.000(.053) | 0.005(.055)  |
| SensorimotorMouthRightVentraldc   | 0.959 | 0.994 | -0.052 | -2.481 | -0.052(.124) | -0.052(.131) |
| SaliencyLeftCerebellum            | 0.456 | 0.812 | 0.745  | -2.224 | 0.013(.107)  | 0.018(.100)  |
| SaliencyLeftThalamus              | 0.63  | 0.896 | 0.482  | -2.375 | 0.087(.141)  | 0.093(.147)  |
| SaliencyLeftCaudate               | 0.091 | 0.445 | 1.692  | -1.09  | 0.112(.144)  | 0.130(.144)  |
| SaliencyLeftPutamen               | 0.336 | 0.704 | 0.962  | -2.042 | 0.026(.085)  | 0.033(.093)  |
| SaliencyLeftPallidum              | 0.656 | 0.904 | 0.445  | -2.396 | -0.052(.113) | -0.049(.113) |
| SaliencyBrainStem                 | 0.925 | 0.983 | -0.094 | -2.496 | 0.046(.113)  | 0.045(.109)  |
| SaliencyLeftHippocampus           | 0.122 | 0.486 | -1.546 | -1.33  | -0.067(.106) | -0.079(.106) |
| SaliencyLeftAmygdala              | 0.756 | 0.91  | 0.31   | -2.447 | 0.011(.173)  | 0.015(.159)  |
| SaliencyLeftAccumbens             | 0.013 | 0.197 | 2.486  | 0.527  | 0.096(.093)  | 0.114(.103)  |

|                                  |              |              |               |              |                     |                     |
|----------------------------------|--------------|--------------|---------------|--------------|---------------------|---------------------|
| <b>SaliencelLeftVentraldc</b>    | <b>0.001</b> | <b>0.051</b> | <b>-3.294</b> | <b>2.809</b> | <b>-0.097(.094)</b> | <b>-0.120(.092)</b> |
| SaliencelRightCerebellum         | 0.277        | 0.668        | -1.087        | -1.92        | -0.058(.082)        | -0.065(.088)        |
| SaliencelRightThalamus           | 0.014        | 0.197        | 2.461         | 0.464        | 0.127(.058)         | 0.138(.060)         |
| SaliencelRightCaudate            | 0.033        | 0.273        | 2.133         | -0.284       | 0.285(.154)         | 0.308(.150)         |
| SaliencelRightPutamen            | 0.759        | 0.91         | -0.307        | -2.445       | 0.007(.102)         | 0.005(.095)         |
| SaliencelRightPallidum           | 0.952        | 0.994        | 0.06          | -2.487       | -0.010(.156)        | -0.009(.143)        |
| SaliencelRightHippocampus        | 0.058        | 0.347        | 1.899         | -0.743       | -0.019(.147)        | 0.002(.149)         |
| SaliencelRightAmygdala           | 0.016        | 0.197        | 2.409         | 0.341        | 0.004(.096)         | 0.021(.094)         |
| SaliencelRightAccumbens          | 0.559        | 0.857        | -0.585        | -2.328       | -0.038(.116)        | -0.043(.115)        |
| SaliencelRightVentraldc          | 0.241        | 0.642        | 1.172         | -1.807       | 0.062(.108)         | 0.071(.104)         |
| VentralAttentionLeftCerebellum   | 0.078        | 0.415        | -1.766        | -0.972       | 0.010(.101)         | -0.003(.103)        |
| VentralAttentionLeftThalamus     | 0.447        | 0.805        | 0.76          | -2.211       | -0.094(.151)        | -0.086(.148)        |
| VentralAttentionLeftCaudate      | 0.08         | 0.415        | 1.751         | -0.989       | 0.018(.087)         | 0.030(.092)         |
| VentralAttentionLeftPutamen      | 0.239        | 0.642        | -1.178        | -1.818       | -0.048(.088)        | -0.055(.083)        |
| VentralAttentionLeftPallidum     | 0.684        | 0.904        | -0.407        | -2.415       | -0.061(.083)        | -0.063(.087)        |
| VentralAttentionBrainStem        | 0.108        | 0.46         | 1.61          | -1.231       | 0.076(.064)         | 0.083(.060)         |
| VentralAttentionLeftHippocampus  | 0.274        | 0.668        | 1.095         | -1.902       | 0.101(.127)         | 0.112(.138)         |
| VentralAttentionLeftAmygdala     | 0.745        | 0.91         | -0.325        | -2.444       | 0.023(.103)         | 0.020(.101)         |
| VentralAttentionLeftAccumbens    | 0.734        | 0.91         | 0.34          | -2.437       | 0.046(.149)         | 0.050(.147)         |
| VentralAttentionLeftVentraldc    | 0.636        | 0.897        | 0.473         | -2.386       | -0.048(.138)        | -0.043(.146)        |
| VentralAttentionRightCerebellum  | 0.25         | 0.653        | 1.151         | -1.84        | 0.048(.088)         | 0.056(.092)         |
| VentralAttentionRightThalamus    | 0.621        | 0.893        | 0.494         | -2.363       | -0.044(.116)        | -0.040(.113)        |
| VentralAttentionRightCaudate     | 0.356        | 0.71         | 0.922         | -2.065       | 0.005(.102)         | 0.012(.100)         |
| VentralAttentionRightPutamen     | 0.704        | 0.906        | 0.38          | -2.418       | -0.009(.088)        | -0.007(.093)        |
| VentralAttentionRightPallidum    | 0.327        | 0.7          | 0.98          | -2.014       | 0.024(.157)         | 0.035(.145)         |
| VentralAttentionRightHippocampus | 0.889        | 0.965        | 0.14          | -2.482       | 0.080(.092)         | 0.081(.090)         |
| VentralAttentionRightAmygdala    | 0.19         | 0.582        | -1.311        | -1.639       | -0.059(.087)        | -0.067(.087)        |
| VentralAttentionRightAccumbens   | 0.092        | 0.445        | -1.688        | -1.077       | -0.013(.078)        | -0.024(.081)        |
| VentralAttentionRightVentraldc   | 0.618        | 0.892        | 0.499         | -2.36        | 0.061(.057)         | 0.063(.056)         |
| VisualLeftCerebellum             | 0.602        | 0.877        | 0.522         | -2.366       | 0.072(.133)         | 0.077(.129)         |
| VisualLeftThalamus               | 0.238        | 0.642        | 1.181         | -1.803       | -0.011(.092)        | -0.004(.085)        |
| VisualLeftCaudate                | 0.913        | 0.978        | -0.109        | -2.474       | -0.036(.148)        | -0.037(.136)        |
| VisualLeftPutamen                | 0.481        | 0.82         | -0.705        | -2.252       | 0.122(.143)         | 0.115(.141)         |

|                                 |              |               |              |              |                    |                    |
|---------------------------------|--------------|---------------|--------------|--------------|--------------------|--------------------|
| VisualLeftPallidum              | 0.837        | 0.941         | -0.206       | -2.456       | 0.020(.083)        | 0.018(.085)        |
| VisualBrainStem                 | 0.714        | 0.907         | 0.367        | -2.404       | -0.066(.099)       | -0.063(.104)       |
| VisualLeftHippocampus           | 0.335        | 0.704         | 0.964        | -2.045       | 0.050(.114)        | 0.058(.118)        |
| VisualLeftAmygdala              | 0.277        | 0.668         | 1.087        | -1.924       | 0.037(.098)        | 0.046(.103)        |
| VisualLeftAccumbens             | 0.596        | 0.877         | 0.53         | -2.36        | 0.016(.160)        | 0.022(.154)        |
| VisualLeftVentraldc             | 0.69         | 0.904         | -0.399       | -2.416       | 0.030(.100)        | 0.027(.093)        |
| VisualRightCerebellum           | 0.97         | 0.994         | 0.038        | -2.491       | -0.068(.093)       | -0.067(.089)       |
| VisualRightThalamus             | 0.55         | 0.857         | -0.599       | -2.316       | -0.030(.087)       | -0.034(.088)       |
| VisualRightCaudate              | 0.118        | 0.474         | 1.565        | -1.294       | 0.034(.057)        | 0.040(.056)        |
| VisualRightPutamen              | 0.767        | 0.91          | 0.296        | -2.458       | 0.092(.133)        | 0.095(.136)        |
| VisualRightPallidum             | 0.099        | 0.447         | 1.648        | -1.172       | -0.037(.104)       | -0.025(.104)       |
| VisualRightHippocampus          | 0.308        | 0.697         | 1.02         | -1.984       | 0.012(.149)        | 0.023(.149)        |
| VisualRightAmygdala             | 0.804        | 0.925         | 0.248        | -2.459       | 0.114(.145)        | 0.117(.143)        |
| VisualRightAccumbens            | 0.672        | 0.904         | 0.424        | -2.414       | 0.005(.088)        | 0.008(.094)        |
| VisualRightVentraldc            | 0.56         | 0.857         | -0.582       | -2.323       | -0.016(.112)       | -0.021(.121)       |
| WithinAuditory                  | 0.362        | 0.71          | 0.912        | -2.1         | 0.293(.085)        | 0.299(.091)        |
| <b>WithinCinguloOpercula</b>    | <b>0.002</b> | <b>0.074</b>  | <b>3.142</b> | <b>2.323</b> | <b>0.273(.080)</b> | <b>0.291(.078)</b> |
| WithinCinguloParietal           | 0.061        | 0.353         | 1.873        | -0.794       | 0.735(.247)        | 0.767(.237)        |
| WithinDefault                   | 0.024        | 0.251         | 2.261        | -0.003       | 0.236(.069)        | 0.248(.070)        |
| WithinDorsalAttention           | 0.086        | 0.437         | 1.719        | -1.067       | 0.240(.088)        | 0.249(.077)        |
| WithinFrontoParietal            | 0.86         | 0.957         | -0.176       | -2.491       | 0.205(.068)        | 0.204(.068)        |
| <b>WithinRetrosplenialTempo</b> | <b>0</b>     | <b>0.042*</b> | <b>3.644</b> | <b>3.989</b> | <b>0.485(.143)</b> | <b>0.525(.152)</b> |
| WithinSensorimotorHand          | 0.161        | 0.52          | -1.401       | -1.539       | 0.269(.080)        | 0.261(.079)        |
| WithinSensorimotorMouth         | 0.488        | 0.82          | 0.693        | -2.259       | 0.576(.175)        | 0.585(.175)        |
| WithinSalience                  | 0.26         | 0.668         | 1.127        | -1.876       | 0.381(.153)        | 0.393(.151)        |
| WithinVentralAttention          | 0.058        | 0.347         | 1.9          | -0.746       | 0.218(.077)        | 0.228(.072)        |
| WithinVisual                    | 0.079        | 0.415         | 1.757        | -1.006       | 0.402(.112)        | 0.416(.107)        |
| AuditoryCinguloOpercular        | 0.381        | 0.725         | 0.876        | -2.13        | 0.161(.064)        | 0.166(.068)        |
| AuditoryCinguloParietal         | 0.92         | 0.981         | -0.101       | -2.496       | -0.053(.091)       | -0.054(.087)       |
| AuditoryDefault                 | 0.787        | 0.914         | 0.271        | -2.467       | -0.043(.051)       | -0.042(.054)       |
| AuditoryDorsalAttention         | 0.415        | 0.769         | -0.816       | -2.173       | -0.026(.053)       | -0.029(.050)       |
| AuditoryFrontoParietal          | 0.18         | 0.571         | 1.34         | -1.626       | -0.045(.049)       | -0.040(.050)       |
| AuditoryRetrosplenialTempo      | 0.684        | 0.904         | -0.408       | -2.424       | -0.033(.077)       | -0.036(.077)       |
| AuditorySensorimotorHand        | 0.883        | 0.965         | -0.148       | -2.488       | 0.113(.070)        | 0.112(.069)        |
| AuditorySensorimotorMout        | 0.995        | 0.997         | -0.006       | -2.503       | 0.214(.102)        | 0.214(.092)        |
| AuditorySalience                | 0.297        | 0.688         | 1.044        | -1.973       | 0.034(.090)        | 0.041(.087)        |
| AuditoryVentralAttention        | 0.316        | 0.697         | 1.002        | -2.016       | 0.059(.050)        | 0.063(.058)        |
| AuditoryVisual                  | 0.303        | 0.697         | -1.03        | -1.985       | -0.042(.067)       | -0.047(.069)       |
| CinguloOpercularCinguloPar      | 0.354        | 0.71          | 0.928        | -2.086       | -0.004(.087)       | 0.001(.083)        |
| ietal                           | 0.093        | 0.445         | -1.681       | -1.128       | -0.093(.064)       | -0.101(.065)       |
| CinguloOpercularDefault         | 0.093        | 0.445         | -1.681       | -1.128       | -0.093(.064)       | -0.101(.065)       |
| CinguloOpercularDorsalAtte      | 0.685        | 0.904         | 0.405        | -2.425       | 0.076(.053)        | 0.078(.053)        |
| ntion                           | 0.685        | 0.904         | 0.405        | -2.425       | 0.076(.053)        | 0.078(.053)        |
| CinguloOpercularFrontoPari      | 0.625        | 0.894         | 0.489        | -2.393       | -0.021(.050)       | -0.019(.052)       |
| etal                            | 0.625        | 0.894         | 0.489        | -2.393       | -0.021(.050)       | -0.019(.052)       |
| CinguloOpercularRetrosplen      | 0.027        | 0.264         | -2.206       | -0.128       | -0.088(.072)       | -0.100(.079)       |
| ialTemporal                     | 0.027        | 0.264         | -2.206       | -0.128       | -0.088(.072)       | -0.100(.079)       |

|                                      |              |               |               |             |                     |                     |
|--------------------------------------|--------------|---------------|---------------|-------------|---------------------|---------------------|
| CinguloOpercularSensorimotorHand     | 0.336        | 0.704         | -0.962        | -2.05       | 0.087(.056)         | 0.083(.056)         |
| CinguloOpercularSensorimotorMouth    | 0.652        | 0.904         | 0.451         | -2.399      | 0.117(.084)         | 0.119(.080)         |
| CinguloOpercularSalience             | 0.442        | 0.801         | 0.769         | -2.216      | 0.117(.085)         | 0.122(.084)         |
| CinguloOpercularVentralAttention     | 0.096        | 0.445         | 1.664         | -1.157      | 0.011(.052)         | 0.018(.059)         |
| CinguloOpercularVisual               | 0.409        | 0.767         | -0.827        | -2.173      | -0.022(.066)        | -0.026(.068)        |
| CinguloParietalDefault               | 0.901        | 0.97          | -0.125        | -2.502      | 0.021(.082)         | 0.021(.084)         |
| CinguloParietalDorsalAttention       | 0.889        | 0.965         | 0.139         | -2.498      | 0.003(.083)         | 0.004(.081)         |
| CinguloParietalFrontoParietal        | 0.523        | 0.849         | 0.638         | -2.308      | 0.030(.070)         | 0.034(.077)         |
| CinguloParietalRetrosplenialTemporal | 0.321        | 0.7           | 0.993         | -2.036      | 0.116(.114)         | 0.125(.122)         |
| CinguloParietalSensorimotorHand      | 0.53         | 0.849         | 0.628         | -2.314      | -0.095(.082)        | -0.092(.079)        |
| CinguloParietalSensorimotorMouth     | 0.311        | 0.697         | -1.014        | -1.999      | -0.053(.115)        | -0.062(.112)        |
| CinguloParietalSalience              | 0.464        | 0.815         | 0.733         | -2.246      | 0.088(.122)         | 0.094(.117)         |
| CinguloParietalVentralAttention      | 0.954        | 0.994         | 0.058         | -2.5        | -0.084(.076)        | -0.084(.081)        |
| CinguloParietalVisual                | 0.789        | 0.914         | -0.267        | -2.471      | 0.063(.111)         | 0.060(.107)         |
| <b>DefaultDorsalAttention</b>        | <b>0.001</b> | <b>0.045*</b> | <b>-3.441</b> | <b>3.29</b> | <b>-0.113(.063)</b> | <b>-0.129(.063)</b> |
| DefaultFrontoParietal                | 0.819        | 0.935         | -0.229        | -2.473      | 0.055(.051)         | 0.054(.052)         |
| DefaultRetrosplenialTemporal         | 0.343        | 0.709         | 0.949         | -2.058      | 0.050(.065)         | 0.054(.069)         |
| DefaultSensorimotorHand              | 0.569        | 0.859         | 0.57          | -2.348      | -0.051(.053)        | -0.049(.051)        |
| DefaultSensorimotorMouth             | 0.877        | 0.965         | -0.154        | -2.487      | -0.079(.069)        | -0.080(.069)        |
| DefaultSalience                      | 0.264        | 0.668         | 1.118         | -1.895      | 0.078(.073)         | 0.084(.074)         |
| DefaultVentralAttention              | 0.031        | 0.266         | 2.162         | -0.215      | 0.092(.055)         | 0.101(.058)         |
| DefaultVisual                        | 0.196        | 0.582         | -1.292        | -1.683      | -0.147(.059)        | -0.153(.065)        |
| DorsalAttentionFrontoParietal        | 0.739        | 0.91          | 0.333         | -2.447      | 0.045(.049)         | 0.046(.048)         |
| DorsalAttentionRetrosplenialTemporal | 0.997        | 0.997         | 0.004         | -2.503      | -0.001(.066)        | -0.001(.068)        |
| DorsalAttentionSensorimotorHand      | 0.574        | 0.859         | -0.562        | -2.348      | 0.039(.046)         | 0.037(.047)         |
| DorsalAttentionSensorimotorMouth     | 0.731        | 0.91          | -0.344        | -2.443      | -0.018(.071)        | -0.020(.067)        |
| DorsalAttentionSalience              | 0.076        | 0.415         | -1.777        | -0.959      | -0.037(.067)        | -0.046(.071)        |
| DorsalAttentionVentralAttention      | 0.05         | 0.324         | -1.962        | -0.623      | -0.076(.058)        | -0.084(.055)        |
| DorsalAttentionVisual                | 0.29         | 0.678         | 1.058         | -1.955      | 0.036(.057)         | 0.041(.061)         |
| FrontoParietalRetrosplenialTemporal  | 0.746        | 0.91          | -0.323        | -2.458      | -0.068(.059)        | -0.069(.062)        |
| FrontoParietalSensorimotorHand       | 0.611        | 0.886         | 0.509         | -2.376      | -0.056(.051)        | -0.054(.049)        |
| FrontoParietalSensorimotorMouth      | 0.011        | 0.197         | 2.533         | 0.644       | -0.080(.061)        | -0.068(.064)        |
| FrontoParietalSalience               | 0.373        | 0.721         | 0.892         | -2.122      | 0.072(.068)         | 0.077(.069)         |

|                                        |       |       |        |        |              |              |
|----------------------------------------|-------|-------|--------|--------|--------------|--------------|
| FrontoParietalVentralAttention         | 0.74  | 0.91  | 0.332  | -2.46  | 0.019(.050)  | 0.021(.047)  |
| FrontoParietalVisual                   | 0.239 | 0.642 | -1.177 | -1.814 | -0.110(.055) | -0.115(.057) |
| RetrosplenialTemporalSensorimotorHand  | 0.757 | 0.91  | 0.309  | -2.464 | -0.042(.067) | -0.041(.063) |
| RetrosplenialTemporalSensorimotorMouth | 0.533 | 0.85  | -0.623 | -2.308 | -0.030(.086) | -0.034(.095) |
| RetrosplenialTemporalSalience          | 0.633 | 0.897 | -0.477 | -2.4   | -0.057(.100) | -0.061(.104) |
| RetrosplenialTemporalVentralAttention  | 0.72  | 0.91  | -0.358 | -2.438 | -0.067(.068) | -0.069(.072) |
| RetrosplenialTemporalVisual            | 0.678 | 0.904 | 0.415  | -2.41  | 0.123(.093)  | 0.125(.088)  |
| SensorimotorHandSensorimotorMouth      | 0.141 | 0.503 | -1.472 | -1.437 | 0.094(.098)  | 0.084(.095)  |
| SensorimotorHandSalience               | 0.855 | 0.955 | -0.182 | -2.491 | -0.055(.071) | -0.056(.074) |
| SensorimotorHandVentralAttention       | 0.15  | 0.503 | 1.439  | -1.483 | -0.009(.051) | -0.003(.051) |
| SensorimotorHandVisual                 | 0.829 | 0.94  | -0.216 | -2.48  | -0.054(.068) | -0.055(.064) |
| SensorimotorMouthSalience              | 0.737 | 0.91  | 0.336  | -2.438 | -0.038(.111) | -0.036(.104) |
| SensorimotorMouthVentralAttention      | 0.198 | 0.582 | 1.288  | -1.692 | -0.000(.061) | 0.006(.069)  |
| SensorimotorMouthVisual                | 0.993 | 0.997 | -0.009 | -2.5   | 0.036(.082)  | 0.036(.086)  |
| SalienceVentralAttention               | 0.016 | 0.197 | 2.41   | 0.339  | 0.075(.074)  | 0.088(.074)  |
| SalienceVisual                         | 0.6   | 0.877 | 0.525  | -2.363 | -0.083(.080) | -0.080(.080) |
| VentralAttentionVisual                 | 0.049 | 0.324 | -1.966 | -0.61  | -0.103(.056) | -0.112(.062) |

\* = qFDR < .05. Bold = qFDR < .05 or  $\ln(\text{BF}_{10}) > 1.1$ . The value of  $\ln(\text{BF}_{10}) > 1.1$  and  $< -1.2$  are interpreted as substantial evidence for the alternative (of there being a difference), and null hypotheses (of there being no difference), respectively.

**eTable 3.** Group differences between children with vs. without low mood in the resting-state fMRI connectivity  $z[r]$

| Name                             | $p$   | $q_{FDR}$ | $t$    | $\ln(BF_{10})$ | With Low Mood $M(SD)$ | Without Low Mood $M(SD)$ |
|----------------------------------|-------|-----------|--------|----------------|-----------------------|--------------------------|
| AuditoryLeftCerebellum           | 0.021 | 0.599     | 2.304  | 0.046          | -0.103(.126)          | -0.083(.122)             |
| AuditoryLeftThalamus             | 0.745 | 0.983     | 0.325  | -2.513         | -0.048(.114)          | -0.045(.109)             |
| AuditoryLeftCaudate              | 0.884 | 0.999     | 0.146  | -2.539         | -0.025(.156)          | -0.023(.158)             |
| AuditoryLeftPutamen              | 0.507 | 0.939     | -0.663 | -2.334         | -0.065(.099)          | -0.070(.099)             |
| AuditoryLeftPallidum             | 0.992 | 0.999     | -0.01  | -2.551         | -0.022(.093)          | -0.023(.094)             |
| AuditoryBrainStem                | 0.582 | 0.94      | -0.551 | -2.41          | 0.000(.091)           | -0.004(.101)             |
| AuditoryLeftHippocampus          | 0.701 | 0.976     | -0.385 | -2.475         | -0.033(.058)          | -0.035(.057)             |
| AuditoryLeftAmygdala             | 0.213 | 0.859     | -1.245 | -1.793         | -0.048(.150)          | -0.060(.137)             |
| AuditoryLeftAccumbens            | 0.146 | 0.832     | 1.454  | -1.52          | -0.076(.116)          | -0.064(.116)             |
| AuditoryLeftVentraldc            | 0.568 | 0.94      | 0.571  | -2.397         | -0.048(.162)          | -0.042(.160)             |
| AuditoryRightCerebellum          | 0.234 | 0.859     | 1.189  | -1.864         | -0.049(.165)          | -0.036(.150)             |
| AuditoryRightThalamus            | 0.682 | 0.976     | 0.409  | -2.476         | -0.103(.104)          | -0.100(.095)             |
| AuditoryRightCaudate             | 0.879 | 0.999     | 0.152  | -2.544         | -0.045(.129)          | -0.043(.127)             |
| AuditoryRightPutamen             | 0.206 | 0.859     | 1.266  | -1.775         | 0.124(.137)           | 0.136(.138)              |
| AuditoryRightPallidum            | 0.709 | 0.976     | 0.373  | -2.493         | 0.154(.108)           | 0.157(.104)              |
| AuditoryRightHippocampus         | 0.777 | 0.983     | -0.283 | -2.521         | 0.039(.167)           | 0.036(.156)              |
| AuditoryRightAmygdala            | 0.533 | 0.94      | -0.624 | -2.362         | -0.019(.101)          | -0.023(.096)             |
| AuditoryRightAccumbens           | 0.313 | 0.879     | 1.009  | -2.064         | -0.024(.093)          | -0.018(.091)             |
| AuditoryRightVentraldc           | 0.019 | 0.599     | -2.357 | 0.166          | -0.052(.085)          | -0.066(.088)             |
| CinguloOpercularLeftCerebellum   | 0.283 | 0.865     | -1.075 | -1.988         | 0.009(.056)           | 0.005(.055)              |
| CinguloOpercularLeftThalamus     | 0.32  | 0.882     | 0.995  | -2.073         | 0.059(.129)           | 0.068(.134)              |
| CinguloOpercularLeftCaudate      | 0.34  | 0.888     | 0.954  | -2.107         | 0.017(.110)           | 0.025(.121)              |
| CinguloOpercularLeftPutamen      | 0.719 | 0.976     | -0.36  | -2.492         | 0.110(.164)           | 0.106(.162)              |
| CinguloOpercularLeftPallidum     | 0.696 | 0.976     | 0.391  | -2.484         | 0.138(.144)           | 0.142(.149)              |
| CinguloOpercularBrainStem        | 0.451 | 0.938     | -0.754 | -2.276         | 0.029(.100)           | 0.023(.101)              |
| CinguloOpercularLeftHippocampus  | 0.16  | 0.832     | 1.404  | -1.587         | -0.023(.114)          | -0.012(.114)             |
| CinguloOpercularLeftAmygdala     | 0.245 | 0.859     | 1.163  | -1.878         | 0.047(.122)           | 0.057(.120)              |
| CinguloOpercularLeftAccumbens    | 0.148 | 0.832     | 1.447  | -1.527         | 0.091(.098)           | 0.102(.104)              |
| CinguloOpercularLeftVentraldc    | 0.274 | 0.859     | -1.094 | -1.966         | -0.061(.158)          | -0.073(.160)             |
| CinguloOpercularRightCerebellum  | 0.047 | 0.606     | -1.984 | -0.625         | 0.101(.095)           | 0.088(.097)              |
| CinguloOpercularRightThalamus    | 0.468 | 0.939     | 0.726  | -2.298         | -0.048(.087)          | -0.044(.092)             |
| CinguloOpercularRightCaudate     | 0.955 | 0.999     | -0.057 | -2.552         | 0.061(.089)           | 0.061(.094)              |
| CinguloOpercularRightPutamen     | 0.229 | 0.859     | -1.204 | -1.847         | 0.056(.056)           | 0.051(.055)              |
| CinguloOpercularRightPallidum    | 0.595 | 0.943     | 0.532  | -2.421         | -0.075(.123)          | -0.071(.129)             |
| CinguloOpercularRightHippocampus | 0.236 | 0.859     | -1.186 | -1.863         | -0.009(.114)          | -0.018(.112)             |
| CinguloOpercularRightAmygdala    | 0.416 | 0.938     | 0.813  | -2.224         | -0.044(.157)          | -0.036(.147)             |
| CinguloOpercularRightAccumbens   | 0.504 | 0.939     | 0.668  | -2.322         | 0.241(.146)           | 0.248(.143)              |
| CinguloOpercularRightVentraldc   | 0.813 | 0.996     | -0.237 | -2.526         | 0.126(.100)           | 0.125(.100)              |
| CinguloParietalLeftCerebellum    | 0.66  | 0.976     | 0.439  | -2.461         | -0.170(.129)          | -0.167(.121)             |
| CinguloParietalLeftThalamus      | 0.45  | 0.938     | -0.755 | -2.285         | 0.219(.128)           | 0.213(.124)              |
| CinguloParietalLeftCaudate       | 0.936 | 0.999     | 0.08   | -2.558         | 0.253(.101)           | 0.254(.105)              |
| CinguloParietalLeftPutamen       | 0.834 | 0.999     | -0.21  | -2.53          | -0.059(.145)          | -0.061(.150)             |
| CinguloParietalLeftPallidum      | 0.351 | 0.888     | -0.932 | -2.13          | -0.021(.088)          | -0.027(.100)             |
| CinguloParietalBrainStem         | 0.51  | 0.939     | -0.659 | -2.35          | 0.005(.083)           | 0.001(.093)              |
| CinguloParietalLeftHippocampus   | 0.773 | 0.983     | -0.288 | -2.518         | -0.017(.080)          | -0.019(.088)             |

|                                    |              |              |              |              |                     |                     |
|------------------------------------|--------------|--------------|--------------|--------------|---------------------|---------------------|
| CinguloParietalLeftAmygdala        | 0.157        | 0.832        | -1.415       | -1.575       | 0.019(.055)         | 0.014(.056)         |
| CinguloParietalLeftAccumbens       | 0.069        | 0.663        | -1.817       | -0.935       | -0.032(.133)        | -0.049(.135)        |
| CinguloParietalLeftVentraldc       | 0.443        | 0.938        | -0.768       | -2.264       | 0.098(.093)         | 0.092(.106)         |
| CinguloParietalRightCerebellum     | 0.706        | 0.976        | -0.377       | -2.489       | 0.153(.150)         | 0.149(.157)         |
| CinguloParietalRightThalamus       | 0.709        | 0.976        | 0.374        | -2.481       | 0.180(.157)         | 0.184(.152)         |
| CinguloParietalRightCaudate        | 0.304        | 0.879        | -1.029       | -2.038       | 0.094(.103)         | 0.086(.104)         |
| CinguloParietalRightPutamen        | 0.189        | 0.859        | 1.315        | -1.703       | -0.100(.113)        | -0.089(.116)        |
| CinguloParietalRightPallidum       | 0.752        | 0.983        | 0.316        | -2.51        | 0.123(.128)         | 0.125(.119)         |
| CinguloParietalRightHippocampus    | 0.841        | 0.999        | -0.2         | -2.534       | 0.154(.104)         | 0.153(.103)         |
| CinguloParietalRightAmygdala       | 0.873        | 0.999        | -0.159       | -2.536       | -0.044(.138)        | -0.046(.144)        |
| CinguloParietalRightAccumbens      | 0.847        | 0.999        | -0.194       | -2.538       | -0.000(.085)        | -0.002(.095)        |
| CinguloParietalRightVentraldc      | 0.631        | 0.975        | -0.481       | -2.441       | -0.019(.084)        | -0.022(.087)        |
| DefaultLeftCerebellum              | 0.183        | 0.859        | 1.331        | -1.684       | -0.013(.086)        | -0.005(.083)        |
| DefaultLeftThalamus                | 0.58         | 0.94         | 0.554        | -2.397       | 0.012(.051)         | 0.015(.054)         |
| DefaultLeftCaudate                 | 0.647        | 0.976        | 0.458        | -2.452       | -0.061(.128)        | -0.057(.135)        |
| DefaultLeftPutamen                 | 0.359        | 0.894        | -0.917       | -2.146       | 0.035(.096)         | 0.029(.100)         |
| DefaultLeftPallidum                | 0.333        | 0.888        | -0.968       | -2.095       | 0.126(.158)         | 0.115(.160)         |
| DefaultBrainStem                   | 0.441        | 0.938        | -0.77        | -2.26        | 0.146(.148)         | 0.138(.142)         |
| DefaultLeftHippocampus             | 0.518        | 0.94         | -0.647       | -2.351       | 0.070(.092)         | 0.066(.092)         |
| DefaultLeftAmygdala                | 0.944        | 0.999        | -0.071       | -2.546       | -0.077(.115)        | -0.078(.113)        |
| DefaultLeftAccumbens               | 0.348        | 0.888        | 0.938        | -2.124       | 0.066(.122)         | 0.074(.117)         |
| DefaultLeftVentraldc               | 0.145        | 0.832        | 1.457        | -1.514       | 0.055(.101)         | 0.065(.103)         |
| DefaultRightCerebellum             | 0.231        | 0.859        | 1.199        | -1.848       | 0.009(.147)         | 0.021(.152)         |
| DefaultRightThalamus               | 0.629        | 0.975        | -0.484       | -2.43        | -0.018(.093)        | -0.021(.091)        |
| DefaultRightCaudate                | 0.726        | 0.976        | 0.351        | -2.485       | -0.042(.084)        | -0.040(.084)        |
| DefaultRightPutamen                | 0.039        | 0.599        | -2.07        | -0.449       | -0.033(.082)        | -0.046(.085)        |
| DefaultRightPallidum               | 0.869        | 0.999        | -0.165       | -2.534       | 0.008(.060)         | 0.007(.063)         |
| DefaultRightHippocampus            | 0.509        | 0.939        | 0.66         | -2.331       | 0.063(.130)         | 0.069(.130)         |
| DefaultRightAmygdala               | 0.275        | 0.859        | 1.092        | -1.96        | -0.029(.098)        | -0.021(.104)        |
| DefaultRightAccumbens              | 0.475        | 0.939        | -0.715       | -2.312       | 0.085(.172)         | 0.076(.166)         |
| DefaultRightVentraldc              | 0.216        | 0.859        | -1.237       | -1.805       | 0.086(.154)         | 0.073(.150)         |
| DorsalAttentionLeftCerebellum      | 0.495        | 0.939        | -0.682       | -2.323       | -0.011(.098)        | -0.015(.095)        |
| <b>DorsalAttentionLeftThalamus</b> | <b>0.003</b> | <b>0.304</b> | <b>2.981</b> | <b>1.807</b> | <b>-0.028(.116)</b> | <b>-0.005(.109)</b> |
| DorsalAttentionLeftCaudate         | 0.053        | 0.607        | 1.938        | -0.709       | 0.032(.114)         | 0.047(.110)         |
| DorsalAttentionLeftPutamen         | 0.032        | 0.599        | -2.148       | -0.293       | -0.067(.115)        | -0.084(.113)        |
| DorsalAttentionLeftPallidum        | 0.089        | 0.758        | 1.7          | -1.144       | -0.010(.173)        | 0.010(.165)         |
| DorsalAttentionBrainStem           | 0.249        | 0.859        | 1.153        | -1.898       | 0.124(.112)         | 0.132(.109)         |
| DorsalAttentionLeftHippocampus     | 0.125        | 0.83         | -1.537       | -1.395       | -0.117(.099)        | -0.127(.095)        |
| DorsalAttentionLeftAmygdala        | 0.043        | 0.599        | -2.028       | -0.536       | -0.052(.086)        | -0.064(.089)        |
| DorsalAttentionLeftAccumbens       | 0.656        | 0.976        | -0.445       | -2.454       | 0.143(.061)         | 0.141(.062)         |
| DorsalAttentionLeftVentraldc       | 0.235        | 0.859        | 1.189        | -1.866       | 0.272(.149)         | 0.284(.151)         |
| DorsalAttentionRightCerebellum     | 0.794        | 0.992        | 0.261        | -2.508       | -0.003(.092)        | -0.001(.100)        |
| DorsalAttentionRightThalamus       | 0.791        | 0.992        | 0.265        | -2.519       | -0.016(.145)        | -0.013(.143)        |
| DorsalAttentionRightCaudate        | 0.539        | 0.94         | -0.615       | -2.366       | 0.025(.156)         | 0.019(.154)         |
| DorsalAttentionRightPutamen        | 0.563        | 0.94         | -0.578       | -2.389       | 0.046(.098)         | 0.042(.095)         |
| DorsalAttentionRightPallidum       | 0.333        | 0.888        | 0.968        | -2.076       | -0.067(.112)        | -0.059(.117)        |
| DorsalAttentionRightHippocampus    | 0.768        | 0.983        | -0.295       | -2.512       | 0.061(.104)         | 0.059(.105)         |
| DorsalAttentionRightAmygdala       | 0.593        | 0.943        | -0.535       | -2.415       | -0.006(.098)        | -0.010(.103)        |
| DorsalAttentionRightAccumbens      | 0.303        | 0.879        | 1.029        | -2.037       | -0.088(.148)        | -0.078(.145)        |
| DorsalAttentionRightVentraldc      | 0.814        | 0.996        | -0.236       | -2.523       | 0.042(.086)         | 0.041(.089)         |

|                                       |              |              |              |             |                     |                     |
|---------------------------------------|--------------|--------------|--------------|-------------|---------------------|---------------------|
| FrontoParietalLeftCerebellum          | 0.813        | 0.996        | -0.236       | -2.526      | -0.055(.084)        | -0.056(.085)        |
| FrontoParietalLeftThalamus            | 0.011        | 0.599        | -2.555       | 0.647       | -0.050(.084)        | -0.065(.084)        |
| FrontoParietalLeftCaudate             | 0.121        | 0.83         | -1.551       | -1.379      | 0.093(.060)         | 0.087(.059)         |
| FrontoParietalLeftPutamen             | 0.132        | 0.83         | 1.507        | -1.438      | 0.098(.131)         | 0.112(.133)         |
| FrontoParietalLeftPallidum            | 0.491        | 0.939        | -0.689       | -2.308      | 0.020(.083)         | 0.016(.095)         |
| FrontoParietalBrainStem               | 0.656        | 0.976        | 0.445        | -2.452      | 0.038(.137)         | 0.043(.144)         |
| FrontoParietalLeftHippocampus         | 0.117        | 0.83         | -1.568       | -1.348      | -0.016(.150)        | -0.032(.147)        |
| FrontoParietalLeftAmygdala            | 0.251        | 0.859        | -1.149       | -1.911      | 0.071(.094)         | 0.064(.091)         |
| FrontoParietalLeftAccumbens           | 0.732        | 0.976        | 0.342        | -2.487      | -0.053(.110)        | -0.051(.107)        |
| FrontoParietalLeftVentraldc           | 0.69         | 0.976        | 0.399        | -2.453      | 0.016(.105)         | 0.019(.098)         |
| FrontoParietalRightCerebellum         | 0.384        | 0.905        | 0.87         | -2.177      | -0.008(.098)        | -0.002(.095)        |
| FrontoParietalRightThalamus           | 0.979        | 0.999        | 0.026        | -2.554      | 0.022(.147)         | 0.022(.148)         |
| FrontoParietalRightCaudate            | 0.76         | 0.983        | -0.305       | -2.512      | 0.091(.096)         | 0.089(.096)         |
| FrontoParietalRightPutamen            | 0.911        | 0.999        | 0.111        | -2.549      | -0.073(.086)        | -0.073(.086)        |
| FrontoParietalRightPallidum           | 0.565        | 0.94         | -0.575       | -2.388      | -0.026(.074)        | -0.029(.084)        |
| FrontoParietalRightHippocampus        | 0.03         | 0.599        | -2.171       | -0.24       | 0.072(.060)         | 0.063(.056)         |
| FrontoParietalRightAmygdala           | 0.559        | 0.94         | -0.584       | -2.387      | 0.068(.116)         | 0.063(.128)         |
| FrontoParietalRightAccumbens          | 0.458        | 0.939        | -0.742       | -2.26       | 0.000(.087)         | -0.004(.091)        |
| FrontoParietalRightVentraldc          | 0.559        | 0.94         | -0.584       | -2.367      | -0.026(.134)        | -0.031(.130)        |
| RetrosplenialTemporalLeftCerebellum   | 0.342        | 0.888        | 0.951        | -2.112      | -0.027(.102)        | -0.020(.102)        |
| RetrosplenialTemporalLeftThalamus     | 0.614        | 0.964        | 0.504        | -2.433      | -0.052(.095)        | -0.049(.093)        |
| RetrosplenialTemporalLeftCaudate      | 0.556        | 0.94         | -0.588       | -2.387      | -0.030(.090)        | -0.034(.096)        |
| RetrosplenialTemporalLeftPutamen      | 0.508        | 0.939        | -0.662       | -2.342      | -0.019(.057)        | -0.021(.059)        |
| RetrosplenialTemporalLeftPallidum     | 0.45         | 0.938        | -0.756       | -2.271      | -0.074(.142)        | -0.081(.136)        |
| RetrosplenialTemporalBrainStem        | 0.035        | 0.599        | 2.107        | -0.366      | -0.068(.110)        | -0.051(.112)        |
| RetrosplenialTemporalLeftHippocampus  | 0.27         | 0.859        | 1.103        | -1.958      | -0.070(.173)        | -0.058(.160)        |
| RetrosplenialTemporalLeftAmygdala     | 0.558        | 0.94         | -0.586       | -2.379      | -0.051(.157)        | -0.057(.150)        |
| RetrosplenialTemporalLeftAccumbens    | 0.718        | 0.976        | 0.361        | -2.491      | -0.066(.102)        | -0.063(.098)        |
| RetrosplenialTemporalLeftVentraldc    | 0.995        | 0.999        | -0.006       | -2.55       | -0.099(.120)        | -0.099(.127)        |
| RetrosplenialTemporalRightCerebellum  | 0.398        | 0.916        | 0.845        | -2.217      | 0.118(.135)         | 0.125(.135)         |
| RetrosplenialTemporalRightThalamus    | 0.125        | 0.83         | 1.533        | -1.409      | 0.145(.104)         | 0.156(.109)         |
| RetrosplenialTemporalRightCaudate     | 0.917        | 0.999        | 0.105        | -2.55       | 0.055(.162)         | 0.056(.157)         |
| RetrosplenialTemporalRightPutamen     | 0.237        | 0.859        | -1.184       | -1.868      | -0.019(.092)        | -0.027(.101)        |
| RetrosplenialTemporalRightPallidum    | 0.698        | 0.976        | -0.389       | -2.485      | -0.019(.091)        | -0.022(.092)        |
| RetrosplenialTemporalRightHippocampus | 0.268        | 0.859        | -1.108       | -1.953      | -0.031(.086)        | -0.038(.092)        |
| RetrosplenialTemporalRightAmygdala    | 0.727        | 0.976        | -0.349       | -2.505      | 0.007(.057)         | 0.006(.057)         |
| RetrosplenialTemporalRightAccumbens   | 0.773        | 0.983        | 0.288        | -2.522      | 0.088(.125)         | 0.090(.136)         |
| RetrosplenialTemporalRightVentraldc   | 0.283        | 0.865        | 1.075        | -1.985      | 0.012(.120)         | 0.021(.120)         |
| SensorimotorHandLeftCerebellum        | 0.192        | 0.859        | 1.304        | -1.73       | 0.084(.165)         | 0.099(.167)         |
| SensorimotorHandLeftThalamus          | 0.725        | 0.976        | 0.352        | -2.492      | 0.146(.143)         | 0.150(.143)         |
| SensorimotorHandLeftCaudate           | 0.025        | 0.599        | -2.248       | -0.087      | 0.010(.110)         | -0.006(.104)        |
| <b>SensorimotorHandLeftPutamen</b>    | <b>0.004</b> | <b>0.304</b> | <b>2.883</b> | <b>1.52</b> | <b>-0.028(.119)</b> | <b>-0.005(.119)</b> |
| SensorimotorHandLeftPallidum          | 0.682        | 0.976        | -0.409       | -2.466      | 0.057(.128)         | 0.053(.124)         |
| SensorimotorHandBrainStem             | 0.252        | 0.859        | 1.146        | -1.906      | 0.100(.095)         | 0.108(.107)         |
| SensorimotorHandLeftHippocampus       | 0.311        | 0.879        | -1.013       | -2.052      | -0.043(.156)        | -0.054(.159)        |
| SensorimotorHandLeftAmygdala          | 0.056        | 0.607        | -1.916       | -0.752      | 0.084(.099)         | 0.071(.097)         |
| SensorimotorHandLeftAccumbens         | 0.673        | 0.976        | -0.422       | -2.462      | -0.038(.091)        | -0.041(.090)        |
| SensorimotorHandLeftVentraldc         | 0.937        | 0.999        | 0.079        | -2.544      | 0.082(.088)         | 0.082(.089)         |
| SensorimotorHandRightCerebellum       | 0.945        | 0.999        | -0.068       | -2.557      | 0.048(.059)         | 0.047(.058)         |
| SensorimotorHandRightThalamus         | 0.979        | 0.999        | -0.026       | -2.549      | -0.073(.123)        | -0.073(.132)        |

|                                   |       |       |        |        |              |              |
|-----------------------------------|-------|-------|--------|--------|--------------|--------------|
| SensorimotorHandRightCaudate      | 0.152 | 0.832 | -1.434 | -1.55  | -0.014(.124) | -0.026(.116) |
| SensorimotorHandRightPutamen      | 0.487 | 0.939 | 0.695  | -2.318 | -0.040(.160) | -0.032(.150) |
| SensorimotorHandRightPallidum     | 0.304 | 0.879 | 1.027  | -2.037 | 0.243(.145)  | 0.253(.146)  |
| SensorimotorHandRightHippocampus  | 0.954 | 0.999 | 0.058  | -2.561 | 0.097(.096)  | 0.098(.099)  |
| SensorimotorHandRightAmygdala     | 0.105 | 0.83  | 1.623  | -1.27  | -0.172(.127) | -0.158(.123) |
| SensorimotorHandRightAccumbens    | 0.992 | 0.999 | -0.01  | -2.556 | 0.214(.123)  | 0.214(.127)  |
| SensorimotorHandRightVentraldc    | 0.683 | 0.976 | 0.409  | -2.477 | 0.255(.101)  | 0.259(.107)  |
| SensorimotorMouthLeftCerebellum   | 0.363 | 0.894 | -0.91  | -2.147 | -0.049(.132) | -0.058(.147) |
| SensorimotorMouthLeftThalamus     | 0.654 | 0.976 | 0.448  | -2.455 | -0.037(.096) | -0.034(.100) |
| SensorimotorMouthLeftCaudate      | 0.848 | 0.999 | -0.192 | -2.533 | 0.008(.086)  | 0.007(.086)  |
| SensorimotorMouthLeftPutamen      | 0.608 | 0.959 | 0.513  | -2.418 | -0.016(.076) | -0.013(.083) |
| SensorimotorMouthLeftPallidum     | 0.273 | 0.859 | 1.097  | -1.957 | 0.007(.055)  | 0.012(.057)  |
| SensorimotorMouthBrainStem        | 0.261 | 0.859 | -1.125 | -1.938 | -0.041(.124) | -0.051(.134) |
| SensorimotorMouthLeftHippocampus  | 0.896 | 0.999 | -0.131 | -2.541 | 0.089(.096)  | 0.088(.104)  |
| SensorimotorMouthLeftAmygdala     | 0.815 | 0.996 | -0.233 | -2.532 | 0.167(.144)  | 0.164(.154)  |
| SensorimotorMouthLeftAccumbens    | 0.823 | 0.996 | -0.224 | -2.533 | 0.186(.150)  | 0.184(.152)  |
| SensorimotorMouthLeftVentraldc    | 0.895 | 0.999 | -0.131 | -2.549 | 0.079(.105)  | 0.078(.102)  |
| SensorimotorMouthRightCerebellum  | 0.557 | 0.94  | 0.587  | -2.384 | -0.080(.110) | -0.076(.115) |
| SensorimotorMouthRightThalamus    | 0.959 | 0.999 | 0.051  | -2.558 | 0.093(.120)  | 0.093(.116)  |
| SensorimotorMouthRightCaudate     | 0.636 | 0.976 | 0.474  | -2.451 | 0.142(.099)  | 0.146(.106)  |
| SensorimotorMouthRightPutamen     | 0.587 | 0.94  | -0.543 | -2.406 | -0.017(.132) | -0.023(.142) |
| SensorimotorMouthRightPallidum    | 0.537 | 0.94  | 0.618  | -2.369 | -0.027(.090) | -0.023(.094) |
| SensorimotorMouthRightHippocampus | 0.529 | 0.94  | -0.629 | -2.351 | -0.004(.080) | -0.008(.087) |
| SensorimotorMouthRightAmygdala    | 0.343 | 0.888 | 0.948  | -2.108 | -0.000(.081) | 0.006(.085)  |
| SensorimotorMouthRightAccumbens   | 0.187 | 0.859 | 1.319  | -1.692 | 0.000(.051)  | 0.005(.055)  |
| SensorimotorMouthRightVentraldc   | 0.246 | 0.859 | -1.159 | -1.895 | -0.043(.120) | -0.053(.131) |
| SaliencyLeftCerebellum            | 0.895 | 0.999 | 0.132  | -2.537 | 0.017(.105)  | 0.018(.100)  |
| SaliencyLeftThalamus              | 0.16  | 0.832 | -1.405 | -1.577 | 0.105(.145)  | 0.091(.146)  |
| SaliencyLeftCaudate               | 0.923 | 0.999 | 0.097  | -2.544 | 0.127(.139)  | 0.128(.144)  |
| SaliencyLeftPutamen               | 0.5   | 0.939 | 0.674  | -2.324 | 0.029(.088)  | 0.033(.092)  |
| SaliencyLeftPallidum              | 0.127 | 0.83  | -1.529 | -1.404 | -0.038(.109) | -0.050(.113) |
| SaliencyBrainStem                 | 0.979 | 0.999 | 0.026  | -2.549 | 0.045(.107)  | 0.045(.110)  |
| SaliencyLeftHippocampus           | 0.082 | 0.735 | -1.742 | -1.061 | -0.067(.113) | -0.080(.105) |
| SaliencyLeftAmygdala              | 0.013 | 0.599 | 2.491  | 0.483  | -0.010(.152) | 0.018(.161)  |
| SaliencyLeftAccumbens             | 0.506 | 0.939 | 0.666  | -2.336 | 0.108(.103)  | 0.113(.102)  |
| SaliencyLeftVentraldc             | 0.951 | 0.999 | 0.062  | -2.544 | -0.118(.093) | -0.118(.092) |
| SaliencyRightCerebellum           | 0.048 | 0.606 | -1.981 | -0.63  | -0.053(.087) | -0.065(.087) |
| SaliencyRightThalamus             | 0.994 | 0.999 | -0.007 | -2.544 | 0.137(.053)  | 0.137(.061)  |
| SaliencyRightCaudate              | 0.029 | 0.599 | 2.179  | -0.227 | 0.285(.152)  | 0.308(.150)  |
| SaliencyRightPutamen              | 0.397 | 0.916 | -0.847 | -2.187 | 0.011(.096)  | 0.005(.096)  |
| SaliencyRightPallidum             | 0.627 | 0.975 | -0.486 | -2.433 | -0.005(.144) | -0.010(.144) |
| SaliencyRightHippocampus          | 0.491 | 0.939 | 0.689  | -2.316 | -0.007(.146) | 0.001(.149)  |
| SaliencyRightAmygdala             | 0.344 | 0.888 | -0.947 | -2.126 | 0.025(.093)  | 0.019(.094)  |
| SaliencyRightAccumbens            | 0.863 | 0.999 | 0.172  | -2.532 | -0.043(.118) | -0.042(.115) |
| SaliencyRightVentraldc            | 0.902 | 0.999 | 0.123  | -2.534 | 0.070(.109)  | 0.071(.104)  |
| VentralAttentionLeftCerebellum    | 0.176 | 0.859 | -1.353 | -1.655 | 0.006(.103)  | -0.003(.102) |
| VentralAttentionLeftThalamus      | 0.932 | 0.999 | -0.085 | -2.555 | -0.086(.143) | -0.087(.149) |
| VentralAttentionLeftCaudate       | 0.574 | 0.94  | -0.563 | -2.384 | 0.032(.091)  | 0.028(.092)  |
| VentralAttentionLeftPutamen       | 0.287 | 0.871 | -1.064 | -2.004 | -0.049(.083) | -0.055(.084) |
| VentralAttentionLeftPallidum      | 0.03  | 0.599 | -2.177 | -0.231 | -0.051(.083) | -0.064(.087) |

|                                    |              |              |            |              |                    |                    |
|------------------------------------|--------------|--------------|------------|--------------|--------------------|--------------------|
| VentralAttentionBrainStem          | 0.12         | 0.83         | -1.555     | -1.364       | 0.089(.058)        | 0.082(.061)        |
| VentralAttentionLeftHippocampus    | 0.424        | 0.938        | 0.8        | -2.243       | 0.104(.135)        | 0.112(.137)        |
| VentralAttentionLeftAmygdala       | 0.743        | 0.983        | -0.327     | -2.497       | 0.023(.093)        | 0.020(.102)        |
| VentralAttentionLeftAccumbens      | 0.549        | 0.94         | 0.599      | -2.379       | 0.044(.146)        | 0.050(.148)        |
| VentralAttentionLeftVentraldc      | 0.065        | 0.663        | -1.846     | -0.879       | -0.027(.150)       | -0.045(.144)       |
| VentralAttentionRightCerebellum    | 0.852        | 0.999        | -0.186     | -2.538       | 0.056(.090)        | 0.055(.092)        |
| VentralAttentionRightThalamus      | 0.544        | 0.94         | 0.607      | -2.363       | -0.044(.113)       | -0.039(.113)       |
| VentralAttentionRightCaudate       | 0.087        | 0.758        | 1.711      | -1.093       | 0.000(.101)        | 0.013(.100)        |
| VentralAttentionRightPutamen       | 0.508        | 0.939        | 0.661      | -2.322       | -0.011(.088)       | -0.007(.093)       |
| VentralAttentionRightPallidum      | 0.946        | 0.999        | -0.067     | -2.549       | 0.034(.144)        | 0.034(.147)        |
| VentralAttentionRightHippocampus   | 0.155        | 0.832        | -1.424     | -1.564       | 0.088(.095)        | 0.080(.090)        |
| VentralAttentionRightAmygdala      | 0.838        | 0.999        | 0.205      | -2.532       | -0.068(.090)       | -0.067(.087)       |
| VentralAttentionRightAccumbens     | 0.446        | 0.938        | -0.762     | -2.266       | -0.019(.076)       | -0.023(.082)       |
| VentralAttentionRightVentraldc     | 0.529        | 0.94         | -0.629     | -2.355       | 0.065(.058)        | 0.063(.056)        |
| VisualLeftCerebellum               | 0.929        | 0.999        | 0.089      | -2.547       | 0.075(.128)        | 0.076(.129)        |
| VisualLeftThalamus                 | 0.512        | 0.939        | 0.655      | -2.324       | -0.008(.085)       | -0.004(.086)       |
| VisualLeftCaudate                  | 0.911        | 0.999        | -0.112     | -2.538       | -0.036(.146)       | -0.037(.136)       |
| VisualLeftPutamen                  | 0.348        | 0.888        | 0.938      | -2.118       | 0.107(.149)        | 0.116(.140)        |
| VisualLeftPallidum                 | 0.144        | 0.832        | 1.462      | -1.501       | 0.011(.082)        | 0.019(.085)        |
| VisualBrainStem                    | 0.996        | 0.999        | 0.005      | -2.543       | -0.063(.099)       | -0.063(.104)       |
| VisualLeftHippocampus              | 0.118        | 0.83         | -1.566     | -1.353       | 0.069(.116)        | 0.056(.117)        |
| VisualLeftAmygdala                 | 0.824        | 0.996        | -0.223     | -2.535       | 0.046(.103)        | 0.045(.103)        |
| VisualLeftAccumbens                | 0.367        | 0.894        | 0.903      | -2.161       | 0.012(.149)        | 0.022(.155)        |
| VisualLeftVentraldc                | 0.436        | 0.938        | -0.779     | -2.253       | 0.032(.094)        | 0.027(.094)        |
| VisualRightCerebellum              | 0.899        | 0.999        | 0.127      | -2.545       | -0.068(.095)       | -0.067(.089)       |
| VisualRightThalamus                | 0.067        | 0.663        | -1.83      | -0.908       | -0.024(.087)       | -0.035(.088)       |
| VisualRightCaudate                 | 0.115        | 0.83         | -1.577     | -1.331       | 0.045(.054)        | 0.039(.056)        |
| VisualRightPutamen                 | 0.301        | 0.879        | 1.035      | -2.031       | 0.086(.133)        | 0.096(.136)        |
| VisualRightPallidum                | 0.225        | 0.859        | -1.214     | -1.824       | -0.018(.101)       | -0.027(.104)       |
| VisualRightHippocampus             | 0.755        | 0.983        | -0.312     | -2.509       | 0.025(.154)        | 0.022(.148)        |
| VisualRightAmygdala                | 0.727        | 0.976        | 0.349      | -2.489       | 0.113(.146)        | 0.117(.143)        |
| VisualRightAccumbens               | 0.726        | 0.976        | 0.351      | -2.497       | 0.006(.096)        | 0.008(.094)        |
| VisualRightVentraldc               | 0.025        | 0.599        | 2.247      | -0.083       | -0.037(.119)       | -0.019(.120)       |
| WithinAuditory                     | 0.672        | 0.976        | 0.424      | -2.476       | 0.296(.088)        | 0.299(.091)        |
| WithinCinguloOpercula              | 0.058        | 0.609        | 1.899      | -0.798       | 0.280(.075)        | 0.291(.078)        |
| WithinCinguloParietal              | 0.043        | 0.599        | 2.024      | -0.56        | 0.735(.251)        | 0.767(.236)        |
| WithinDefault                      | 0.414        | 0.938        | 0.817      | -2.236       | 0.243(.075)        | 0.247(.070)        |
| WithinDorsalAttention              | 0.273        | 0.859        | 1.097      | -1.976       | 0.243(.082)        | 0.249(.078)        |
| WithinFrontoParietal               | 0.376        | 0.896        | 0.886      | -2.187       | 0.200(.072)        | 0.204(.067)        |
| <b>WithinRetrosplenialTemporal</b> | <b>0.004</b> | <b>0.304</b> | <b>2.9</b> | <b>1.558</b> | <b>0.494(.140)</b> | <b>0.524(.152)</b> |
| WithinSensorimotorHand             | 0.85         | 0.999        | -0.19      | -2.538       | 0.262(.074)        | 0.261(.079)        |
| WithinSensorimotorMouth            | 0.462        | 0.939        | 0.736      | -2.302       | 0.576(.170)        | 0.585(.176)        |
| WithinSalience                     | 0.775        | 0.983        | -0.286     | -2.523       | 0.395(.142)        | 0.392(.152)        |
| WithinVentralAttention             | 0.371        | 0.894        | 0.895      | -2.177       | 0.223(.081)        | 0.228(.072)        |
| WithinVisual                       | 0.026        | 0.599        | 2.227      | -0.134       | 0.400(.106)        | 0.416(.108)        |
| AuditoryCinguloOpercular           | 0.482        | 0.939        | 0.703      | -2.32        | 0.162(.064)        | 0.166(.068)        |
| AuditoryCinguloParietal            | 0.143        | 0.832        | -1.467     | -1.512       | -0.046(.086)       | -0.055(.087)       |
| AuditoryDefault                    | 0.568        | 0.94         | -0.571     | -2.384       | -0.041(.051)       | -0.043(.054)       |
| AuditoryDorsalAttention            | 0.67         | 0.976        | -0.426     | -2.469       | -0.027(.049)       | -0.029(.050)       |
| AuditoryFrontoParietal             | 0.67         | 0.976        | -0.426     | -2.481       | -0.040(.051)       | -0.041(.050)       |

|                                               |              |              |               |              |                     |                     |
|-----------------------------------------------|--------------|--------------|---------------|--------------|---------------------|---------------------|
| AuditoryRetrosplenialTemporal                 | 0.248        | 0.859        | -1.156        | -1.898       | -0.030(.078)        | -0.036(.077)        |
| AuditorySensorimotorHand                      | 0.129        | 0.83         | -1.519        | -1.429       | 0.119(.064)         | 0.112(.069)         |
| AuditorySensorimotorMouth                     | 0.73         | 0.976        | -0.346        | -2.507       | 0.216(.091)         | 0.214(.093)         |
| AuditorySalience                              | 0.216        | 0.859        | -1.237        | -1.805       | 0.047(.092)         | 0.040(.087)         |
| AuditoryVentralAttention                      | 0.31         | 0.879        | -1.015        | -2.054       | 0.067(.057)         | 0.063(.058)         |
| AuditoryVisual                                | 0.459        | 0.939        | -0.741        | -2.29        | -0.043(.068)        | -0.047(.069)        |
| CinguloOpercularCinguloParietal               | 0.916        | 0.999        | 0.105         | -2.566       | 0.000(.084)         | 0.001(.084)         |
| CinguloOpercularDefault                       | 0.37         | 0.894        | -0.896        | -2.174       | -0.097(.062)        | -0.101(.065)        |
| CinguloOpercularDorsalAttention               | 0.675        | 0.976        | 0.42          | -2.479       | 0.076(.050)         | 0.078(.053)         |
| CinguloOpercularFrontoParietal                | 0.819        | 0.996        | -0.229        | -2.544       | -0.018(.048)        | -0.019(.052)        |
| CinguloOpercularRetrosplenialTemporal         | 0.201        | 0.859        | -1.278        | -1.756       | -0.093(.077)        | -0.100(.078)        |
| CinguloOpercularSensorimotorHand              | 0.338        | 0.888        | -0.958        | -2.111       | 0.087(.055)         | 0.083(.056)         |
| CinguloOpercularSensorimotorMouth             | 0.643        | 0.976        | 0.464         | -2.458       | 0.117(.078)         | 0.119(.080)         |
| CinguloOpercularSalience                      | 0.378        | 0.896        | -0.882        | -2.176       | 0.126(.081)         | 0.121(.084)         |
| CinguloOpercularVentralAttention              | 0.752        | 0.983        | -0.316        | -2.515       | 0.019(.055)         | 0.018(.058)         |
| CinguloOpercularVisual                        | 0.865        | 0.999        | 0.17          | -2.55        | -0.026(.065)        | -0.026(.068)        |
| CinguloParietalDefault                        | 0.872        | 0.999        | 0.161         | -2.553       | 0.020(.079)         | 0.021(.084)         |
| CinguloParietalDorsalAttention                | 0.129        | 0.83         | 1.519         | -1.439       | -0.004(.077)        | 0.005(.081)         |
| CinguloParietalFrontoParietal                 | 0.181        | 0.859        | 1.338         | -1.688       | 0.027(.071)         | 0.034(.077)         |
| CinguloParietalRetrosplenialTemporal          | 0.437        | 0.938        | 0.778         | -2.274       | 0.118(.115)         | 0.125(.122)         |
| CinguloParietalSensorimotorHand               | 0.734        | 0.976        | -0.341        | -2.51        | -0.090(.082)        | -0.092(.079)        |
| CinguloParietalSensorimotorMouth              | 0.257        | 0.859        | -1.134        | -1.926       | -0.053(.115)        | -0.062(.112)        |
| CinguloParietalSalience                       | 0.236        | 0.859        | 1.186         | -1.876       | 0.085(.119)         | 0.095(.117)         |
| CinguloParietalVentralAttention               | 0.443        | 0.938        | -0.767        | -2.269       | -0.080(.073)        | -0.085(.081)        |
| CinguloParietalVisual                         | 0.216        | 0.859        | -1.238        | -1.815       | 0.069(.100)         | 0.060(.108)         |
| DefaultDorsalAttention                        | 0.173        | 0.859        | -1.364        | -1.648       | -0.122(.058)        | -0.128(.064)        |
| DefaultFrontoParietal                         | 0.776        | 0.983        | -0.285        | -2.522       | 0.055(.047)         | 0.054(.052)         |
| DefaultRetrosplenialTemporal                  | 0.999        | 0.999        | -0.001        | -2.564       | 0.054(.068)         | 0.054(.069)         |
| DefaultSensorimotorHand                       | 0.586        | 0.94         | -0.545        | -2.416       | -0.047(.049)        | -0.049(.051)        |
| DefaultSensorimotorMouth                      | 0.443        | 0.938        | -0.767        | -2.265       | -0.076(.066)        | -0.080(.069)        |
| DefaultSalience                               | 0.205        | 0.859        | 1.267         | -1.768       | 0.077(.072)         | 0.084(.075)         |
| DefaultVentralAttention                       | 0.824        | 0.996        | 0.223         | -2.536       | 0.100(.058)         | 0.101(.058)         |
| DefaultVisual                                 | 0.985        | 0.999        | -0.019        | -2.562       | -0.152(.064)        | -0.152(.064)        |
| DorsalAttentionFrontoParietal                 | 0.506        | 0.939        | 0.665         | -2.347       | 0.044(.050)         | 0.047(.048)         |
| DorsalAttentionRetrosplenialTemporal          | 0.368        | 0.894        | 0.899         | -2.168       | -0.005(.066)        | -0.000(.068)        |
| DorsalAttentionSensorimotorHand               | 0.05         | 0.606        | 1.965         | -0.659       | 0.031(.045)         | 0.038(.047)         |
| DorsalAttentionSensorimotorMouth              | 0.389        | 0.909        | -0.861        | -2.205       | -0.016(.071)        | -0.020(.067)        |
| DorsalAttentionSalience                       | 0.133        | 0.83         | -1.503        | -1.452       | -0.039(.068)        | -0.046(.071)        |
| DorsalAttentionVentralAttention               | 0.04         | 0.599        | -2.053        | -0.499       | -0.076(.056)        | -0.084(.055)        |
| DorsalAttentionVisual                         | 0.231        | 0.859        | 1.199         | -1.862       | 0.036(.058)         | 0.041(.061)         |
| FrontoParietalRetrosplenialTemporal           | 0.238        | 0.859        | -1.18         | -1.878       | -0.065(.059)        | -0.070(.062)        |
| FrontoParietalSensorimotorHand                | 0.911        | 0.999        | 0.112         | -2.548       | -0.054(.049)        | -0.054(.050)        |
| FrontoParietalSensorimotorMouth               | 0.882        | 0.999        | -0.149        | -2.544       | -0.069(.064)        | -0.069(.063)        |
| FrontoParietalSalience                        | 0.99         | 0.999        | -0.012        | -2.569       | 0.076(.065)         | 0.076(.069)         |
| FrontoParietalVentralAttention                | 0.993        | 0.999        | 0.008         | -2.571       | 0.020(.047)         | 0.020(.048)         |
| FrontoParietalVisual                          | 0.267        | 0.859        | -1.11         | -1.959       | -0.111(.052)        | -0.115(.057)        |
| RetrosplenialTemporalSensorimotorHand         | 0.42         | 0.938        | -0.807        | -2.228       | -0.038(.066)        | -0.041(.063)        |
| <b>RetrosplenialTemporalSensorimotorMouth</b> | <b>0.001</b> | <b>0.244</b> | <b>-3.359</b> | <b>2.974</b> | <b>-0.014(.090)</b> | <b>-0.036(.095)</b> |
| RetrosplenialTemporalSalience                 | 0.925        | 0.999        | 0.094         | -2.551       | -0.061(.096)        | -0.061(.104)        |
| RetrosplenialTemporalVentralAttention         | 0.054        | 0.607        | -1.932        | -0.73        | -0.060(.070)        | -0.070(.072)        |

|                                   |       |       |        |        |              |              |
|-----------------------------------|-------|-------|--------|--------|--------------|--------------|
| RetrosplenialTemporalVisual       | 0.074 | 0.689 | 1.785  | -0.994 | 0.115(.090)  | 0.126(.088)  |
| SensorimotorHandSensorimotorMouth | 0.575 | 0.94  | -0.56  | -2.407 | 0.088(.100)  | 0.084(.095)  |
| SensorimotorHandSaliency          | 0.043 | 0.599 | -2.024 | -0.543 | -0.047(.071) | -0.057(.074) |
| SensorimotorHandVentralAttention  | 0.319 | 0.882 | -0.997 | -2.079 | -0.001(.051) | -0.004(.051) |
| SensorimotorHandVisual            | 0.966 | 0.999 | -0.042 | -2.553 | -0.054(.063) | -0.055(.064) |
| SensorimotorMouthSaliency         | 0.03  | 0.599 | -2.174 | -0.237 | -0.022(.112) | -0.038(.104) |
| SensorimotorMouthVentralAttention | 0.79  | 0.992 | -0.267 | -2.524 | 0.007(.072)  | 0.005(.068)  |
| SensorimotorMouthVisual           | 0.568 | 0.94  | -0.57  | -2.397 | 0.039(.092)  | 0.036(.085)  |
| SaliencyVentralAttention          | 0.937 | 0.999 | 0.08   | -2.558 | 0.087(.077)  | 0.087(.073)  |
| SaliencyVisual                    | 0.998 | 0.999 | -0.002 | -2.546 | -0.080(.077) | -0.080(.080) |
| VentralAttentionVisual            | 0.3   | 0.879 | -1.037 | -2.036 | -0.107(.062) | -0.112(.061) |

\* = qFDR < .05. Bold = qFDR < .05 or  $\ln(\text{BF}_{10}) > 1.1$ . The value of  $\ln(\text{BF}_{10}) > 1.1$  and  $< -1.2$  are interpreted as substantial evidence for the alternative (of there being a difference), and null hypotheses (of there being no difference), respectively.

**eTable 4.** Group differences between children with vs. without Anxiety in the resting-state fMRI connectivity  $z[r]$

| Name                             | $p$   | $q_{FDR}$ | $t$    | $\ln(BF_{10})$ | With Anxiety<br>$M(SD)$ | Without Anxiety<br>$M(SD)$ |
|----------------------------------|-------|-----------|--------|----------------|-------------------------|----------------------------|
| AuditoryLeftCerebellum           | 0.136 | 0.892     | 1.49   | -1.052         | -0.104(.126)            | -0.085(.122)               |
| AuditoryLeftThalamus             | 0.442 | 0.901     | -0.769 | -1.843         | -0.037(.107)            | -0.046(.110)               |
| AuditoryLeftCaudate              | 0.858 | 0.99      | 0.179  | -2.084         | -0.026(.158)            | -0.023(.158)               |
| AuditoryLeftPutamen              | 0.736 | 0.983     | 0.337  | -2.056         | -0.073(.084)            | -0.069(.099)               |
| AuditoryLeftPallidum             | 0.837 | 0.99      | -0.206 | -2.095         | -0.020(.101)            | -0.023(.093)               |
| AuditoryBrainStem                | 0.115 | 0.892     | -1.576 | -0.94          | 0.013(.090)             | -0.004(.100)               |
| AuditoryLeftHippocampus          | 0.492 | 0.953     | -0.687 | -1.905         | -0.030(.056)            | -0.035(.057)               |
| AuditoryLeftAmygdala             | 0.672 | 0.968     | -0.424 | -2.019         | -0.053(.146)            | -0.059(.138)               |
| AuditoryLeftAccumbens            | 0.901 | 0.99      | 0.124  | -2.103         | -0.067(.118)            | -0.065(.116)               |
| AuditoryLeftVentraldc            | 0.158 | 0.892     | 1.413  | -1.16          | -0.066(.164)            | -0.042(.160)               |
| AuditoryRightCerebellum          | 0.994 | 0.997     | -0.007 | -2.115         | -0.037(.169)            | -0.038(.151)               |
| AuditoryRightThalamus            | 0.38  | 0.9       | 0.878  | -1.751         | -0.109(.108)            | -0.100(.095)               |
| AuditoryRightCaudate             | 0.338 | 0.892     | 0.958  | -1.666         | -0.056(.138)            | -0.043(.127)               |
| AuditoryRightPutamen             | 0.81  | 0.99      | -0.24  | -2.109         | 0.138(.147)             | 0.134(.137)                |
| AuditoryRightPallidum            | 0.256 | 0.892     | 1.136  | -1.513         | 0.144(.104)             | 0.157(.104)                |
| AuditoryRightHippocampus         | 0.379 | 0.9       | 0.881  | -1.739         | 0.022(.158)             | 0.037(.157)                |
| AuditoryRightAmygdala            | 0.083 | 0.892     | -1.736 | -0.672         | -0.005(.092)            | -0.023(.097)               |
| AuditoryRightAccumbens           | 0.18  | 0.892     | 1.342  | -1.258         | -0.031(.093)            | -0.018(.091)               |
| AuditoryRightVentraldc           | 0.954 | 0.99      | 0.057  | -2.124         | -0.065(.088)            | -0.065(.087)               |
| CinguloOpercularLeftCerebellum   | 0.607 | 0.968     | -0.514 | -1.967         | 0.009(.051)             | 0.005(.055)                |
| CinguloOpercularLeftThalamus     | 0.542 | 0.953     | -0.609 | -1.938         | 0.076(.134)             | 0.067(.133)                |
| CinguloOpercularLeftCaudate      | 0.884 | 0.99      | -0.146 | -2.111         | 0.026(.111)             | 0.024(.120)                |
| CinguloOpercularLeftPutamen      | 0.158 | 0.892     | -1.412 | -1.165         | 0.130(.159)             | 0.105(.163)                |
| CinguloOpercularLeftPallidum     | 0.7   | 0.983     | 0.385  | -2.039         | 0.136(.150)             | 0.142(.149)                |
| CinguloOpercularBrainStem        | 0.993 | 0.997     | 0.009  | -2.11          | 0.024(.099)             | 0.024(.101)                |
| CinguloOpercularLeftHippocampus  | 0.177 | 0.892     | 1.349  | -1.239         | -0.029(.119)            | -0.012(.114)               |
| CinguloOpercularLeftAmygdala     | 0.293 | 0.892     | 1.051  | -1.596         | 0.043(.112)             | 0.057(.121)                |
| CinguloOpercularLeftAccumbens    | 0.025 | 0.892     | 2.247  | 0.286          | 0.077(.112)             | 0.102(.103)                |
| CinguloOpercularLeftVentraldc    | 0.565 | 0.961     | 0.575  | -1.973         | -0.081(.167)            | -0.071(.160)               |
| CinguloOpercularRightCerebellum  | 0.478 | 0.937     | -0.71  | -1.889         | 0.097(.087)             | 0.089(.097)                |
| CinguloOpercularRightThalamus    | 0.082 | 0.892     | 1.739  | -0.685         | -0.061(.087)            | -0.044(.092)               |
| CinguloOpercularRightCaudate     | 0.587 | 0.968     | -0.543 | -1.99          | 0.066(.092)             | 0.060(.093)                |
| CinguloOpercularRightPutamen     | 0.128 | 0.892     | -1.522 | -0.996         | 0.060(.047)             | 0.051(.055)                |
| CinguloOpercularRightPallidum    | 0.716 | 0.983     | -0.364 | -2.057         | -0.066(.125)            | -0.071(.128)               |
| CinguloOpercularRightHippocampus | 0.304 | 0.892     | 1.029  | -1.608         | -0.029(.103)            | -0.017(.113)               |
| CinguloOpercularRightAmygdala    | 0.515 | 0.953     | 0.651  | -1.923         | -0.046(.146)            | -0.036(.148)               |
| CinguloOpercularRightAccumbens   | 0.221 | 0.892     | 1.223  | -1.389         | 0.228(.148)             | 0.248(.143)                |
| CinguloOpercularRightVentraldc   | 0.286 | 0.892     | 1.066  | -1.581         | 0.114(.095)             | 0.125(.100)                |
| CinguloParietalLeftCerebellum    | 0.544 | 0.953     | 0.607  | -1.96          | -0.175(.130)            | -0.167(.122)               |
| CinguloParietalLeftThalamus      | 0.759 | 0.983     | 0.306  | -2.086         | 0.209(.129)             | 0.214(.124)                |
| CinguloParietalLeftCaudate       | 0.428 | 0.9       | -0.794 | -1.839         | 0.262(.113)             | 0.253(.104)                |
| CinguloParietalLeftPutamen       | 0.375 | 0.9       | -0.886 | -1.739         | -0.047(.150)            | -0.062(.149)               |
| CinguloParietalLeftPallidum      | 0.774 | 0.983     | -0.287 | -2.071         | -0.024(.097)            | -0.027(.099)               |
| CinguloParietalBrainStem         | 0.635 | 0.968     | 0.475  | -2.008         | -0.003(.088)            | 0.001(.092)                |

|                                 |       |       |        |        |              |              |
|---------------------------------|-------|-------|--------|--------|--------------|--------------|
| CinguloParietalLeftHippocampus  | 0.412 | 0.9   | -0.82  | -1.809 | -0.011(.095) | -0.019(.087) |
| CinguloParietalLeftAmygdala     | 0.924 | 0.99  | 0.095  | -2.111 | 0.014(.057)  | 0.015(.056)  |
| CinguloParietalLeftAccumbens    | 0.692 | 0.983 | 0.396  | -2.024 | -0.053(.124) | -0.047(.135) |
| CinguloParietalLeftVentraldc    | 0.753 | 0.983 | 0.315  | -2.089 | 0.089(.114)  | 0.093(.104)  |
| CinguloParietalRightCerebellum  | 0.857 | 0.99  | -0.18  | -2.121 | 0.152(.188)  | 0.149(.155)  |
| CinguloParietalRightThalamus    | 0.843 | 0.99  | -0.198 | -2.097 | 0.187(.178)  | 0.184(.151)  |
| CinguloParietalRightCaudate     | 0.923 | 0.99  | 0.097  | -2.111 | 0.086(.109)  | 0.087(.103)  |
| CinguloParietalRightPutamen     | 0.426 | 0.9   | 0.796  | -1.807 | -0.100(.127) | -0.090(.115) |
| CinguloParietalRightPallidum    | 0.337 | 0.892 | 0.96   | -1.684 | 0.113(.133)  | 0.125(.120)  |
| CinguloParietalRightHippocampus | 0.388 | 0.9   | 0.863  | -1.774 | 0.144(.107)  | 0.153(.103)  |
| CinguloParietalRightAmygdala    | 0.581 | 0.968 | 0.552  | -1.974 | -0.054(.150) | -0.045(.143) |
| CinguloParietalRightAccumbens   | 0.151 | 0.892 | -1.436 | -1.118 | 0.013(.087)  | -0.002(.095) |
| CinguloParietalRightVentraldc   | 0.468 | 0.925 | 0.725  | -1.853 | -0.029(.082) | -0.022(.087) |
| DefaultLeftCerebellum           | 0.929 | 0.99  | -0.089 | -2.09  | -0.005(.094) | -0.006(.083) |
| DefaultLeftThalamus             | 0.917 | 0.99  | -0.104 | -2.1   | 0.015(.055)  | 0.014(.054)  |
| DefaultLeftCaudate              | 0.327 | 0.892 | -0.981 | -1.66  | -0.044(.151) | -0.058(.134) |
| DefaultLeftPutamen              | 0.893 | 0.99  | -0.135 | -2.096 | 0.031(.100)  | 0.029(.100)  |
| DefaultLeftPallidum             | 0.901 | 0.99  | -0.124 | -2.108 | 0.118(.164)  | 0.116(.159)  |
| DefaultBrainStem                | 0.782 | 0.985 | -0.277 | -2.068 | 0.143(.159)  | 0.139(.142)  |
| DefaultLeftHippocampus          | 0.91  | 0.99  | -0.114 | -2.104 | 0.068(.102)  | 0.067(.091)  |
| DefaultLeftAmygdala             | 0.08  | 0.892 | 1.754  | -0.636 | -0.099(.114) | -0.077(.113) |
| DefaultLeftAccumbens            | 0.249 | 0.892 | 1.152  | -1.49  | 0.059(.130)  | 0.073(.117)  |
| DefaultLeftVentraldc            | 0.145 | 0.892 | 1.458  | -1.102 | 0.048(.099)  | 0.065(.103)  |
| DefaultRightCerebellum          | 0.643 | 0.968 | -0.463 | -2.007 | 0.027(.141)  | 0.020(.152)  |
| DefaultRightThalamus            | 0.413 | 0.9   | 0.819  | -1.784 | -0.029(.101) | -0.020(.091) |
| DefaultRightCaudate             | 0.789 | 0.988 | 0.268  | -2.081 | -0.042(.091) | -0.040(.083) |
| DefaultRightPutamen             | 0.774 | 0.983 | 0.288  | -2.06  | -0.047(.083) | -0.044(.084) |
| DefaultRightPallidum            | 0.277 | 0.892 | -1.088 | -1.549 | 0.015(.058)  | 0.007(.062)  |
| DefaultRightHippocampus         | 0.212 | 0.892 | -1.249 | -1.358 | 0.086(.137)  | 0.068(.129)  |
| DefaultRightAmygdala            | 0.966 | 0.995 | 0.043  | -2.093 | -0.023(.090) | -0.022(.104) |
| DefaultRightAccumbens           | 0.895 | 0.99  | 0.132  | -2.097 | 0.075(.158)  | 0.077(.167)  |
| DefaultRightVentraldc           | 0.662 | 0.968 | -0.438 | -2.018 | 0.081(.151)  | 0.074(.150)  |
| DorsalAttentionLeftCerebellum   | 0.877 | 0.99  | -0.155 | -2.088 | -0.013(.086) | -0.015(.096) |
| DorsalAttentionLeftThalamus     | 0.262 | 0.892 | 1.121  | -1.488 | -0.020(.122) | -0.007(.110) |
| DorsalAttentionLeftCaudate      | 0.274 | 0.892 | -1.094 | -1.538 | 0.058(.099)  | 0.045(.111)  |
| DorsalAttentionLeftPutamen      | 0.209 | 0.892 | -1.258 | -1.368 | -0.067(.116) | -0.083(.113) |
| DorsalAttentionLeftPallidum     | 0.073 | 0.892 | 1.791  | -0.583 | -0.023(.149) | 0.009(.166)  |
| DorsalAttentionBrainStem        | 0.818 | 0.99  | 0.231  | -2.096 | 0.129(.094)  | 0.132(.110)  |
| DorsalAttentionLeftHippocampus  | 0.647 | 0.968 | 0.459  | -2.025 | -0.131(.089) | -0.126(.095) |
| DorsalAttentionLeftAmygdala     | 0.765 | 0.983 | -0.299 | -2.068 | -0.060(.077) | -0.063(.089) |
| DorsalAttentionLeftAccumbens    | 0.422 | 0.9   | -0.802 | -1.823 | 0.146(.062)  | 0.141(.061)  |
| DorsalAttentionLeftVentraldc    | 0.376 | 0.9   | 0.886  | -1.745 | 0.269(.169)  | 0.284(.150)  |
| DorsalAttentionRightCerebellum  | 0.996 | 0.997 | -0.005 | -2.099 | -0.001(.094) | -0.001(.099) |
| DorsalAttentionRightThalamus    | 0.257 | 0.892 | -1.133 | -1.495 | 0.003(.159)  | -0.014(.143) |
| DorsalAttentionRightCaudate     | 0.129 | 0.892 | -1.517 | -0.999 | 0.045(.141)  | 0.019(.155)  |
| DorsalAttentionRightPutamen     | 0.222 | 0.892 | -1.222 | -1.4   | 0.055(.096)  | 0.042(.095)  |
| DorsalAttentionRightPallidum    | 0.033 | 0.892 | 2.133  | 0.065  | -0.086(.116) | -0.059(.116) |
| DorsalAttentionRightHippocampus | 0.853 | 0.99  | -0.185 | -2.104 | 0.062(.104)  | 0.059(.105)  |
| DorsalAttentionRightAmygdala    | 0.775 | 0.983 | -0.286 | -2.082 | -0.006(.105) | -0.009(.103) |
| DorsalAttentionRightAccumbens   | 0.201 | 0.892 | 1.278  | -1.308 | -0.099(.136) | -0.078(.145) |

|                                       |       |       |        |        |              |              |
|---------------------------------------|-------|-------|--------|--------|--------------|--------------|
| DorsalAttentionRightVentraldc         | 0.327 | 0.892 | 0.98   | -1.645 | 0.032(.081)  | 0.041(.089)  |
| FrontoParietalLeftCerebellum          | 0.288 | 0.892 | -1.062 | -1.591 | -0.047(.093) | -0.057(.085) |
| FrontoParietalLeftThalamus            | 0.879 | 0.99  | -0.152 | -2.11  | -0.062(.087) | -0.063(.084) |
| FrontoParietalLeftCaudate             | 0.048 | 0.892 | -1.975 | -0.255 | 0.100(.058)  | 0.087(.059)  |
| FrontoParietalLeftPutamen             | 0.514 | 0.953 | 0.653  | -1.906 | 0.101(.150)  | 0.111(.132)  |
| FrontoParietalLeftPallidum            | 0.964 | 0.995 | 0.045  | -2.093 | 0.016(.093)  | 0.016(.094)  |
| FrontoParietalBrainStem               | 0.794 | 0.988 | 0.261  | -2.077 | 0.038(.133)  | 0.042(.144)  |
| FrontoParietalLeftHippocampus         | 0.021 | 0.892 | -2.312 | 0.458  | 0.006(.148)  | -0.032(.147) |
| FrontoParietalLeftAmygdala            | 0.342 | 0.894 | -0.951 | -1.677 | 0.074(.081)  | 0.064(.092)  |
| FrontoParietalLeftAccumbens           | 0.107 | 0.892 | 1.614  | -0.887 | -0.069(.112) | -0.050(.107) |
| FrontoParietalLeftVentraldc           | 0.585 | 0.968 | -0.546 | -1.967 | 0.024(.089)  | 0.018(.099)  |
| FrontoParietalRightCerebellum         | 0.662 | 0.968 | -0.437 | -2.029 | 0.002(.091)  | -0.003(.095) |
| FrontoParietalRightThalamus           | 0.515 | 0.953 | 0.651  | -1.913 | 0.012(.149)  | 0.023(.148)  |
| FrontoParietalRightCaudate            | 0.657 | 0.968 | 0.444  | -2.021 | 0.085(.092)  | 0.090(.096)  |
| FrontoParietalRightPutamen            | 0.215 | 0.892 | 1.239  | -1.39  | -0.084(.083) | -0.072(.086) |
| FrontoParietalRightPallidum           | 0.996 | 0.997 | 0.005  | -2.115 | -0.029(.080) | -0.029(.083) |
| FrontoParietalRightHippocampus        | 0.278 | 0.892 | -1.085 | -1.557 | 0.070(.054)  | 0.064(.057)  |
| FrontoParietalRightAmygdala           | 0.427 | 0.9   | -0.795 | -1.802 | 0.074(.124)  | 0.063(.127)  |
| FrontoParietalRightAccumbens          | 0.897 | 0.99  | 0.13   | -2.102 | -0.005(.095) | -0.004(.091) |
| FrontoParietalRightVentraldc          | 0.361 | 0.9   | -0.913 | -1.706 | -0.018(.155) | -0.031(.129) |
| RetrosplenialTemporalLeftCerebellum   | 0.483 | 0.941 | -0.702 | -1.895 | -0.013(.101) | -0.021(.102) |
| RetrosplenialTemporalLeftThalamus     | 0.184 | 0.892 | 1.329  | -1.275 | -0.062(.084) | -0.049(.094) |
| RetrosplenialTemporalLeftCaudate      | 0.155 | 0.892 | -1.421 | -1.163 | -0.020(.087) | -0.034(.095) |
| RetrosplenialTemporalLeftPutamen      | 0.095 | 0.892 | -1.671 | -0.787 | -0.011(.060) | -0.021(.058) |
| RetrosplenialTemporalLeftPallidum     | 0.13  | 0.892 | -1.514 | -0.998 | -0.058(.141) | -0.081(.136) |
| RetrosplenialTemporalBrainStem        | 0.87  | 0.99  | 0.163  | -2.098 | -0.054(.123) | -0.052(.112) |
| RetrosplenialTemporalLeftHippocampus  | 0.19  | 0.892 | 1.312  | -1.281 | -0.082(.155) | -0.058(.161) |
| RetrosplenialTemporalLeftAmygdala     | 0.28  | 0.892 | -1.08  | -1.557 | -0.040(.152) | -0.057(.150) |
| RetrosplenialTemporalLeftAccumbens    | 0.431 | 0.9   | -0.788 | -1.807 | -0.055(.099) | -0.064(.098) |
| RetrosplenialTemporalLeftVentraldc    | 0.296 | 0.892 | 1.045  | -1.587 | -0.113(.128) | -0.099(.126) |
| RetrosplenialTemporalRightCerebellum  | 0.743 | 0.983 | 0.327  | -2.075 | 0.120(.126)  | 0.125(.135)  |
| RetrosplenialTemporalRightThalamus    | 0.125 | 0.892 | 1.533  | -1     | 0.138(.104)  | 0.155(.108)  |
| RetrosplenialTemporalRightCaudate     | 0.096 | 0.892 | 1.663  | -0.776 | 0.028(.134)  | 0.057(.159)  |
| RetrosplenialTemporalRightPutamen     | 0.498 | 0.953 | -0.678 | -1.896 | -0.019(.103) | -0.026(.100) |
| RetrosplenialTemporalRightPallidum    | 0.262 | 0.892 | 1.122  | -1.513 | -0.033(.093) | -0.021(.092) |
| RetrosplenialTemporalRightHippocampus | 0.323 | 0.892 | 0.989  | -1.652 | -0.047(.089) | -0.037(.091) |
| RetrosplenialTemporalRightAmygdala    | 0.521 | 0.953 | -0.641 | -1.919 | 0.009(.053)  | 0.005(.057)  |
| RetrosplenialTemporalRightAccumbens   | 0.52  | 0.953 | -0.643 | -1.913 | 0.099(.137)  | 0.090(.134)  |
| RetrosplenialTemporalRightVentraldc   | 0.412 | 0.9   | -0.821 | -1.788 | 0.031(.106)  | 0.020(.120)  |
| SensorimotorHandLeftCerebellum        | 0.229 | 0.892 | -1.203 | -1.427 | 0.119(.169)  | 0.097(.166)  |
| SensorimotorHandLeftThalamus          | 0.437 | 0.9   | 0.778  | -1.841 | 0.138(.175)  | 0.150(.141)  |
| SensorimotorHandLeftCaudate           | 0.881 | 0.99  | -0.15  | -2.099 | -0.003(.104) | -0.004(.105) |
| SensorimotorHandLeftPutamen           | 0.317 | 0.892 | 1.002  | -1.625 | -0.020(.133) | -0.006(.119) |
| SensorimotorHandLeftPallidum          | 0.195 | 0.892 | 1.295  | -1.312 | 0.036(.107)  | 0.054(.125)  |
| SensorimotorHandBrainStem             | 0.049 | 0.892 | 1.972  | -0.261 | 0.086(.099)  | 0.108(.106)  |
| SensorimotorHandLeftHippocampus       | 0.324 | 0.892 | 0.987  | -1.664 | -0.069(.151) | -0.052(.159) |
| SensorimotorHandLeftAmygdala          | 0.763 | 0.983 | -0.302 | -2.072 | 0.075(.080)  | 0.072(.098)  |
| SensorimotorHandLeftAccumbens         | 0.653 | 0.968 | 0.45   | -2.039 | -0.044(.093) | -0.040(.090) |
| SensorimotorHandLeftVentraldc         | 0.794 | 0.988 | -0.261 | -2.093 | 0.085(.090)  | 0.082(.089)  |
| SensorimotorHandRightCerebellum       | 0.183 | 0.892 | -1.332 | -1.266 | 0.056(.054)  | 0.047(.058)  |

|                                      |              |              |              |              |                     |                     |
|--------------------------------------|--------------|--------------|--------------|--------------|---------------------|---------------------|
| SensorimotorHandRightThalamus        | 0.885        | 0.99         | 0.145        | -2.095       | -0.075(.122)        | -0.073(.132)        |
| SensorimotorHandRightCaudate         | 0.516        | 0.953        | -0.649       | -1.924       | -0.017(.115)        | -0.025(.117)        |
| SensorimotorHandRightPutamen         | 0.267        | 0.892        | -1.11        | -1.516       | -0.015(.142)        | -0.034(.152)        |
| SensorimotorHandRightPallidum        | 0.036        | 0.892        | 2.094        | -0.009       | 0.220(.131)         | 0.253(.146)         |
| SensorimotorHandRightHippocampus     | 0.12         | 0.892        | 1.554        | -0.964       | 0.081(.092)         | 0.098(.099)         |
| SensorimotorHandRightAmygdala        | 0.704        | 0.983        | -0.38        | -2.041       | -0.154(.128)        | -0.159(.124)        |
| SensorimotorHandRightAccumbens       | 0.54         | 0.953        | 0.613        | -1.956       | 0.206(.127)         | 0.214(.126)         |
| SensorimotorHandRightVentraldc       | 0.605        | 0.968        | 0.517        | -2.013       | 0.253(.109)         | 0.258(.107)         |
| SensorimotorMouthLeftCerebellum      | 0.465        | 0.923        | -0.731       | -1.865       | -0.046(.132)        | -0.057(.147)        |
| SensorimotorMouthLeftThalamus        | 0.516        | 0.953        | -0.649       | -1.929       | -0.028(.094)        | -0.035(.100)        |
| SensorimotorMouthLeftCaudate         | 0.254        | 0.892        | 1.141        | -1.492       | -0.003(.084)        | 0.008(.086)         |
| SensorimotorMouthLeftPutamen         | 0.723        | 0.983        | -0.354       | -2.06        | -0.010(.088)        | -0.014(.082)        |
| SensorimotorMouthLeftPallidum        | 0.562        | 0.961        | -0.579       | -1.97        | 0.015(.059)         | 0.011(.057)         |
| SensorimotorMouthBrainStem           | 0.8          | 0.988        | 0.253        | -2.09        | -0.053(.133)        | -0.050(.133)        |
| SensorimotorMouthLeftHippocampus     | 0.57         | 0.963        | 0.569        | -1.966       | 0.082(.106)         | 0.089(.103)         |
| SensorimotorMouthLeftAmygdala        | 0.627        | 0.968        | -0.486       | -2.008       | 0.172(.147)         | 0.164(.153)         |
| SensorimotorMouthLeftAccumbens       | 0.346        | 0.897        | 0.943        | -1.7         | 0.169(.161)         | 0.185(.151)         |
| SensorimotorMouthLeftVentraldc       | 0.433        | 0.9          | 0.784        | -1.821       | 0.070(.091)         | 0.079(.103)         |
| SensorimotorMouthRightCerebellum     | 0.984        | 0.997        | 0.02         | -2.121       | -0.076(.115)        | -0.076(.114)        |
| SensorimotorMouthRightThalamus       | 0.739        | 0.983        | -0.333       | -2.068       | 0.097(.108)         | 0.093(.117)         |
| SensorimotorMouthRightCaudate        | 0.176        | 0.892        | 1.354        | -1.262       | 0.131(.105)         | 0.146(.105)         |
| <b>SensorimotorMouthRightPutamen</b> | <b>0.003</b> | <b>0.892</b> | <b>2.941</b> | <b>2.034</b> | <b>-0.066(.153)</b> | <b>-0.020(.140)</b> |
| SensorimotorMouthRightPallidum       | 0.238        | 0.892        | 1.179        | -1.434       | -0.036(.090)        | -0.023(.093)        |
| SensorimotorMouthRightHippocampus    | 0.747        | 0.983        | 0.322        | -2.071       | -0.010(.080)        | -0.007(.086)        |
| SensorimotorMouthRightAmygdala       | 0.422        | 0.9          | -0.803       | -1.797       | 0.012(.084)         | 0.005(.085)         |
| SensorimotorMouthRightAccumbens      | 0.396        | 0.9          | -0.849       | -1.744       | 0.010(.060)         | 0.005(.054)         |
| SensorimotorMouthRightVentraldc      | 0.248        | 0.892        | 1.155        | -1.462       | -0.068(.127)        | -0.052(.130)        |
| SaliencyLeftCerebellum               | 0.621        | 0.968        | 0.494        | -1.998       | 0.012(.108)         | 0.018(.101)         |
| SaliencyLeftThalamus                 | 0.651        | 0.968        | -0.453       | -2.012       | 0.099(.155)         | 0.092(.146)         |
| SaliencyLeftCaudate                  | 0.058        | 0.892        | 1.9          | -0.358       | 0.098(.149)         | 0.129(.144)         |
| SaliencyLeftPutamen                  | 0.757        | 0.983        | -0.31        | -2.075       | 0.035(.096)         | 0.032(.092)         |
| SaliencyLeftPallidum                 | 0.218        | 0.892        | -1.231       | -1.384       | -0.034(.111)        | -0.049(.113)        |
| SaliencyBrainStem                    | 0.153        | 0.892        | -1.431       | -1.121       | 0.062(.101)         | 0.045(.110)         |
| SaliencyLeftHippocampus              | 0.083        | 0.892        | -1.732       | -0.693       | -0.059(.121)        | -0.079(.106)        |
| SaliencyLeftAmygdala                 | 0.028        | 0.892        | 2.205        | 0.204        | -0.022(.175)        | 0.016(.160)         |
| SaliencyLeftAccumbens                | 0.155        | 0.892        | 1.424        | -1.149       | 0.097(.102)         | 0.113(.102)         |
| SaliencyLeftVentraldc                | 0.907        | 0.99         | 0.117        | -2.13        | -0.119(.085)        | -0.118(.093)        |
| SaliencyRightCerebellum              | 0.29         | 0.892        | 1.059        | -1.589       | -0.074(.076)        | -0.064(.087)        |
| SaliencyRightThalamus                | 0.096        | 0.892        | -1.667       | -0.793       | 0.147(.054)         | 0.136(.060)         |
| SaliencyRightCaudate                 | 0.021        | 0.892        | 2.311        | 0.426        | 0.270(.157)         | 0.307(.150)         |
| SaliencyRightPutamen                 | 0.104        | 0.892        | -1.626       | -0.834       | 0.022(.087)         | 0.005(.096)         |
| SaliencyRightPallidum                | 0.082        | 0.892        | -1.742       | -0.652       | 0.018(.156)         | -0.010(.144)        |
| SaliencyRightHippocampus             | 0.384        | 0.9          | 0.871        | -1.752       | -0.014(.145)        | 0.000(.149)         |
| SaliencyRightAmygdala                | 0.526        | 0.953        | -0.634       | -1.923       | 0.026(.084)         | 0.019(.095)         |
| SaliencyRightAccumbens               | 0.297        | 0.892        | 1.042        | -1.605       | -0.055(.126)        | -0.042(.115)        |
| SaliencyRightVentraldc               | 0.707        | 0.983        | -0.375       | -2.026       | 0.075(.118)         | 0.070(.104)         |
| VentralAttentionLeftCerebellum       | 0.68         | 0.973        | -0.412       | -2.04        | 0.002(.107)         | -0.002(.102)        |
| VentralAttentionLeftThalamus         | 0.069        | 0.892        | 1.822        | -0.538       | -0.115(.141)        | -0.086(.148)        |
| VentralAttentionLeftCaudate          | 0.656        | 0.968        | 0.446        | -2.01        | 0.024(.082)         | 0.029(.092)         |
| VentralAttentionLeftPutamen          | 0.105        | 0.892        | 1.623        | -0.859       | -0.069(.093)        | -0.054(.083)        |

|                                  |       |       |        |        |              |              |
|----------------------------------|-------|-------|--------|--------|--------------|--------------|
| VentralAttentionLeftPallidum     | 0.366 | 0.9   | -0.904 | -1.734 | -0.055(.089) | -0.063(.086) |
| VentralAttentionBrainStem        | 0.609 | 0.968 | -0.512 | -2     | 0.086(.057)  | 0.083(.061)  |
| VentralAttentionLeftHippocampus  | 0.231 | 0.892 | 1.199  | -1.417 | 0.094(.140)  | 0.112(.137)  |
| VentralAttentionLeftAmygdala     | 0.969 | 0.995 | -0.039 | -2.104 | 0.021(.094)  | 0.021(.102)  |
| VentralAttentionLeftAccumbens    | 0.927 | 0.99  | 0.092  | -2.101 | 0.048(.152)  | 0.050(.147)  |
| VentralAttentionLeftVentraldc    | 0.749 | 0.983 | 0.319  | -2.061 | -0.048(.155) | -0.043(.144) |
| VentralAttentionRightCerebellum  | 0.26  | 0.892 | -1.126 | -1.508 | 0.066(.086)  | 0.055(.092)  |
| VentralAttentionRightThalamus    | 0.15  | 0.892 | 1.441  | -1.111 | -0.057(.115) | -0.039(.113) |
| VentralAttentionRightCaudate     | 0.46  | 0.923 | -0.739 | -1.854 | 0.019(.097)  | 0.011(.100)  |
| VentralAttentionRightPutamen     | 0.912 | 0.99  | -0.111 | -2.109 | -0.006(.086) | -0.007(.093) |
| VentralAttentionRightPallidum    | 0.558 | 0.961 | 0.586  | -1.962 | 0.025(.146)  | 0.034(.146)  |
| VentralAttentionRightHippocampus | 0.858 | 0.99  | 0.179  | -2.121 | 0.079(.093)  | 0.081(.090)  |
| VentralAttentionRightAmygdala    | 0.84  | 0.99  | 0.202  | -2.096 | -0.069(.083) | -0.067(.088) |
| VentralAttentionRightAccumbens   | 0.672 | 0.968 | 0.424  | -2.045 | -0.026(.082) | -0.023(.081) |
| VentralAttentionRightVentraldc   | 0.379 | 0.9   | -0.88  | -1.76  | 0.068(.057)  | 0.063(.056)  |
| VisualLeftCerebellum             | 0.3   | 0.892 | -1.036 | -1.58  | 0.091(.131)  | 0.076(.129)  |
| VisualLeftThalamus               | 0.35  | 0.899 | -0.935 | -1.67  | 0.004(.086)  | -0.005(.086) |
| VisualLeftCaudate                | 0.27  | 0.892 | -1.103 | -1.517 | -0.021(.136) | -0.038(.137) |
| VisualLeftPutamen                | 0.213 | 0.892 | 1.246  | -1.377 | 0.097(.136)  | 0.116(.141)  |
| VisualLeftPallidum               | 0.8   | 0.988 | -0.253 | -2.1   | 0.021(.087)  | 0.018(.085)  |
| VisualBrainStem                  | 0.147 | 0.892 | 1.451  | -1.111 | -0.079(.105) | -0.062(.103) |
| VisualLeftHippocampus            | 0.545 | 0.953 | -0.605 | -1.956 | 0.065(.124)  | 0.057(.117)  |
| VisualLeftAmygdala               | 0.703 | 0.983 | -0.381 | -2.051 | 0.049(.119)  | 0.045(.102)  |
| VisualLeftAccumbens              | 0.866 | 0.99  | -0.169 | -2.102 | 0.024(.145)  | 0.021(.155)  |
| VisualLeftVentraldc              | 0.824 | 0.99  | 0.222  | -2.102 | 0.025(.105)  | 0.028(.093)  |
| VisualRightCerebellum            | 0.667 | 0.968 | 0.43   | -2.037 | -0.071(.104) | -0.067(.089) |
| VisualRightThalamus              | 0.152 | 0.892 | -1.433 | -1.132 | -0.021(.095) | -0.035(.088) |
| VisualRightCaudate               | 0.055 | 0.892 | -1.921 | -0.329 | 0.051(.053)  | 0.039(.056)  |
| VisualRightPutamen               | 0.294 | 0.892 | -1.049 | -1.579 | 0.110(.130)  | 0.094(.136)  |
| VisualRightPallidum              | 0.077 | 0.892 | -1.766 | -0.616 | -0.006(.121) | -0.026(.103) |
| VisualRightHippocampus           | 0.66  | 0.968 | -0.44  | -2.023 | 0.029(.149)  | 0.022(.149)  |
| VisualRightAmygdala              | 0.814 | 0.99  | -0.236 | -2.078 | 0.120(.164)  | 0.116(.143)  |
| VisualRightAccumbens             | 0.949 | 0.99  | 0.064  | -2.119 | 0.007(.098)  | 0.008(.094)  |
| VisualRightVentraldc             | 0.631 | 0.968 | -0.48  | -1.995 | -0.014(.125) | -0.021(.120) |
| WithinAuditory                   | 0.539 | 0.953 | -0.615 | -1.95  | 0.305(.082)  | 0.299(.091)  |
| WithinCinguloOpercula            | 0.178 | 0.892 | 1.346  | -1.268 | 0.279(.076)  | 0.290(.078)  |
| WithinCinguloParietal            | 0.935 | 0.99  | 0.082  | -2.134 | 0.762(.250)  | 0.764(.237)  |
| WithinDefault                    | 0.022 | 0.892 | 2.292  | 0.398  | 0.230(.068)  | 0.247(.070)  |
| WithinDorsalAttention            | 0.777 | 0.983 | 0.283  | -2.088 | 0.246(.076)  | 0.249(.079)  |
| WithinFrontoParietal             | 0.716 | 0.983 | 0.364  | -2.083 | 0.201(.068)  | 0.204(.068)  |
| WithinRetrosplenialTemporal      | 0.725 | 0.983 | 0.352  | -2.082 | 0.516(.128)  | 0.521(.152)  |
| WithinSensorimotorHand           | 0.578 | 0.968 | 0.557  | -1.962 | 0.257(.073)  | 0.261(.079)  |
| WithinSensorimotorMouth          | 0.416 | 0.9   | 0.813  | -1.804 | 0.569(.168)  | 0.585(.175)  |
| WithinSalience                   | 0.61  | 0.968 | -0.51  | -2.012 | 0.400(.163)  | 0.392(.150)  |
| WithinVentralAttention           | 0.674 | 0.968 | 0.421  | -2.037 | 0.224(.077)  | 0.228(.073)  |
| WithinVisual                     | 0.833 | 0.99  | -0.211 | -2.116 | 0.417(.119)  | 0.415(.107)  |
| AuditoryCinguloOpercular         | 0.973 | 0.996 | -0.034 | -2.136 | 0.166(.059)  | 0.165(.068)  |
| AuditoryCinguloParietal          | 0.438 | 0.9   | -0.775 | -1.844 | -0.047(.090) | -0.054(.087) |
| AuditoryDefault                  | 0.707 | 0.983 | -0.376 | -2.074 | -0.040(.057) | -0.043(.054) |
| AuditoryDorsalAttention          | 0.946 | 0.99  | 0.068  | -2.139 | -0.029(.054) | -0.029(.050) |

|                                            |              |              |              |              |                     |                     |
|--------------------------------------------|--------------|--------------|--------------|--------------|---------------------|---------------------|
| AuditoryFrontoParietal                     | 0.05         | 0.892        | 1.959        | -0.3         | -0.051(.051)        | -0.040(.050)        |
| AuditoryRetrosplenialTemporal              | 0.296        | 0.892        | -1.044       | -1.599       | -0.027(.079)        | -0.036(.077)        |
| AuditorySensorimotorHand                   | 0.429        | 0.9          | -0.791       | -1.816       | 0.118(.070)         | 0.112(.069)         |
| AuditorySensorimotorMouth                  | 0.302        | 0.892        | -1.033       | -1.62        | 0.224(.105)         | 0.214(.093)         |
| AuditorySalience                           | 0.955        | 0.99         | -0.057       | -2.119       | 0.041(.085)         | 0.040(.087)         |
| AuditoryVentralAttention                   | 0.217        | 0.892        | 1.236        | -1.385       | 0.055(.054)         | 0.063(.058)         |
| AuditoryVisual                             | 0.319        | 0.892        | -0.998       | -1.639       | -0.039(.064)        | -0.047(.069)        |
| CinguloOpercularCinguloParietal            | 0.657        | 0.968        | 0.445        | -2.032       | -0.003(.091)        | 0.001(.083)         |
| CinguloOpercularDefault                    | 0.206        | 0.892        | -1.266       | -1.368       | -0.092(.065)        | -0.101(.065)        |
| CinguloOpercularDorsalAttention            | 0.933        | 0.99         | 0.084        | -2.128       | 0.077(.056)         | 0.077(.052)         |
| CinguloOpercularFrontoParietal             | 0.944        | 0.99         | 0.07         | -2.139       | -0.020(.050)        | -0.019(.052)        |
| CinguloOpercularRetrosplenialTemporal      | 0.913        | 0.99         | -0.109       | -2.11        | -0.098(.083)        | -0.099(.078)        |
| CinguloOpercularSensorimotorHand           | 0.563        | 0.961        | -0.578       | -1.976       | 0.087(.061)         | 0.083(.056)         |
| CinguloOpercularSensorimotorMouth          | 0.372        | 0.9          | 0.893        | -1.739       | 0.112(.087)         | 0.119(.080)         |
| CinguloOpercularSalience                   | 0.335        | 0.892        | 0.964        | -1.686       | 0.113(.086)         | 0.122(.084)         |
| CinguloOpercularVentralAttention           | 0.333        | 0.892        | -0.969       | -1.672       | 0.024(.051)         | 0.018(.058)         |
| CinguloOpercularVisual                     | 0.282        | 0.892        | 1.075        | -1.587       | -0.033(.077)        | -0.025(.067)        |
| CinguloParietalDefault                     | 0.113        | 0.892        | 1.584        | -0.933       | 0.007(.077)         | 0.021(.084)         |
| CinguloParietalDorsalAttention             | 0.635        | 0.968        | 0.474        | -2.029       | -0.000(.086)        | 0.004(.081)         |
| CinguloParietalFrontoParietal              | 0.046        | 0.892        | 1.992        | -0.228       | 0.018(.064)         | 0.034(.077)         |
| CinguloParietalRetrosplenialTemporal       | 0.626        | 0.968        | -0.488       | -2.018       | 0.130(.142)         | 0.124(.120)         |
| CinguloParietalSensorimotorHand            | 0.464        | 0.923        | -0.732       | -1.859       | -0.086(.080)        | -0.092(.079)        |
| CinguloParietalSensorimotorMouth           | 0.528        | 0.953        | 0.631        | -1.945       | -0.068(.114)        | -0.061(.112)        |
| CinguloParietalSalience                    | 0.408        | 0.9          | 0.828        | -1.798       | 0.084(.117)         | 0.094(.117)         |
| CinguloParietalVentralAttention            | 0.65         | 0.968        | 0.454        | -2.028       | -0.088(.082)        | -0.084(.080)        |
| CinguloParietalVisual                      | 0.069        | 0.892        | -1.822       | -0.539       | 0.081(.098)         | 0.060(.108)         |
| DefaultDorsalAttention                     | 0.294        | 0.892        | -1.051       | -1.612       | -0.121(.064)        | -0.128(.064)        |
| DefaultFrontoParietal                      | 0.875        | 0.99         | -0.157       | -2.109       | 0.055(.051)         | 0.054(.052)         |
| DefaultRetrosplenialTemporal               | 0.157        | 0.892        | 1.416        | -1.175       | 0.044(.066)         | 0.054(.069)         |
| DefaultSensorimotorHand                    | 0.821        | 0.99         | 0.227        | -2.096       | -0.050(.053)        | -0.049(.051)        |
| DefaultSensorimotorMouth                   | 0.064        | 0.892        | -1.851       | -0.483       | -0.066(.075)        | -0.080(.068)        |
| DefaultSalience                            | 0.997        | 0.997        | 0.004        | -2.126       | 0.083(.072)         | 0.083(.074)         |
| DefaultVentralAttention                    | 0.778        | 0.983        | 0.282        | -2.088       | 0.099(.055)         | 0.101(.058)         |
| DefaultVisual                              | 0.731        | 0.983        | -0.344       | -2.065       | -0.150(.061)        | -0.152(.064)        |
| DorsalAttentionFrontoParietal              | 0.404        | 0.9          | -0.834       | -1.803       | 0.050(.053)         | 0.046(.048)         |
| DorsalAttentionRetrosplenialTemporal       | 0.899        | 0.99         | 0.126        | -2.108       | -0.002(.068)        | -0.001(.068)        |
| DorsalAttentionSensorimotorHand            | 0.644        | 0.968        | 0.462        | -2.019       | 0.035(.048)         | 0.037(.047)         |
| DorsalAttentionSensorimotorMouth           | 0.309        | 0.892        | 1.017        | -1.635       | -0.027(.073)        | -0.019(.067)        |
| DorsalAttentionSalience                    | 0.548        | 0.953        | -0.601       | -1.948       | -0.041(.074)        | -0.045(.071)        |
| DorsalAttentionVentralAttention            | 0.354        | 0.9          | 0.926        | -1.725       | -0.089(.062)        | -0.083(.055)        |
| DorsalAttentionVisual                      | 0.401        | 0.9          | -0.84        | -1.798       | 0.045(.063)         | 0.040(.061)         |
| <b>FrontoParietalRetrosplenialTemporal</b> | <b>0.008</b> | <b>0.892</b> | <b>2.656</b> | <b>1.247</b> | <b>-0.086(.060)</b> | <b>-0.069(.062)</b> |
| FrontoParietalSensorimotorHand             | 0.753        | 0.983        | 0.314        | -2.084       | -0.056(.054)        | -0.054(.049)        |
| FrontoParietalSensorimotorMouth            | 0.176        | 0.892        | 1.354        | -1.262       | -0.078(.071)        | -0.069(.063)        |
| FrontoParietalSalience                     | 0.262        | 0.892        | -1.121       | -1.529       | 0.084(.072)         | 0.076(.069)         |
| FrontoParietalVentralAttention             | 0.983        | 0.997        | 0.022        | -2.136       | 0.020(.053)         | 0.020(.047)         |
| FrontoParietalVisual                       | 0.464        | 0.923        | 0.732        | -1.854       | -0.119(.063)        | -0.115(.056)        |
| RetrosplenialTemporalSensorimotorHand      | 0.751        | 0.983        | -0.317       | -2.046       | -0.039(.060)        | -0.041(.064)        |
| RetrosplenialTemporalSensorimotorMouth     | 0.418        | 0.9          | -0.81        | -1.802       | -0.026(.095)        | -0.034(.095)        |
| RetrosplenialTemporalSalience              | 0.904        | 0.99         | -0.12        | -2.109       | -0.059(.099)        | -0.061(.103)        |

|                                       |       |       |        |        |              |              |
|---------------------------------------|-------|-------|--------|--------|--------------|--------------|
| RetrosplenialTemporalVentralAttention | 0.498 | 0.953 | 0.677  | -1.891 | -0.074(.072) | -0.068(.072) |
| RetrosplenialTemporalVisual           | 0.025 | 0.892 | -2.238 | 0.28   | 0.146(.085)  | 0.124(.088)  |
| SensorimotorHandSensorimotorMouth     | 0.327 | 0.892 | -0.98  | -1.666 | 0.094(.112)  | 0.084(.094)  |
| SensorimotorHandSalience              | 0.623 | 0.968 | 0.491  | -2     | -0.060(.080) | -0.056(.074) |
| SensorimotorHandVentralAttention      | 0.157 | 0.892 | 1.415  | -1.157 | -0.011(.048) | -0.004(.051) |
| SensorimotorHandVisual                | 0.661 | 0.968 | -0.439 | -2.024 | -0.052(.071) | -0.055(.064) |
| SensorimotorMouthSalience             | 0.544 | 0.953 | -0.607 | -1.949 | -0.029(.107) | -0.036(.104) |
| SensorimotorMouthVentralAttention     | 0.129 | 0.892 | -1.519 | -1.015 | 0.016(.078)  | 0.005(.068)  |
| SensorimotorMouthVisual               | 0.138 | 0.892 | 1.483  | -1.066 | 0.023(.095)  | 0.036(.085)  |
| SalienceVentralAttention              | 0.909 | 0.99  | 0.114  | -2.125 | 0.086(.082)  | 0.087(.073)  |
| SalienceVisual                        | 0.879 | 0.99  | 0.153  | -2.094 | -0.082(.078) | -0.080(.080) |
| VentralAttentionVisual                | 0.939 | 0.99  | -0.076 | -2.118 | -0.111(.056) | -0.111(.062) |

\* = qFDR < .05. Bold = qFDR < .05 or  $\ln(\text{BF}_{10}) > 1.1$ . The value of  $\ln(\text{BF}_{10}) > 1.1$  and  $< -1.2$  are interpreted as substantial evidence for the alternative (of there being a difference), and null hypotheses (of there being no difference), respectively.

**eTable 5.** Group differences between children with vs. without ADHD in the resting-state fMRI connectivity  $z[r]$

| Name                             | $p$      | $q_{FDR}$     | $t$         | $\ln(BF_{10})$ | With ADHD<br>$M(SD)$ | Without ADHD<br>$M(SD)$ |
|----------------------------------|----------|---------------|-------------|----------------|----------------------|-------------------------|
| AuditoryLeftCerebellum           | 0.567    | 0.879         | -0.573      | -2.592         | -0.082(.126)         | -0.086(.122)            |
| AuditoryLeftThalamus             | 0.793    | 0.925         | 0.262       | -2.717         | -0.047(.119)         | -0.045(.108)            |
| AuditoryLeftCaudate              | 0.483    | 0.86          | 0.701       | -2.496         | -0.029(.169)         | -0.022(.156)            |
| AuditoryLeftPutamen              | 0.282    | 0.759         | 1.075       | -2.176         | -0.075(.097)         | -0.069(.099)            |
| AuditoryLeftPallidum             | 0.133    | 0.567         | 1.501       | -1.636         | -0.029(.104)         | -0.021(.092)            |
| <b>AuditoryBrainStem</b>         | <b>0</b> | <b>0.006*</b> | <b>4.12</b> | <b>5.602</b>   | <b>-0.023(.108)</b>  | <b>0.000(.098)</b>      |
| AuditoryLeftHippocampus          | 0.315    | 0.772         | -1.005      | -2.248         | -0.032(.061)         | -0.035(.057)            |
| AuditoryLeftAmygdala             | 0.869    | 0.953         | -0.166      | -2.728         | -0.058(.147)         | -0.059(.137)            |
| AuditoryLeftAccumbens            | 0.388    | 0.834         | 0.864       | -2.389         | -0.070(.119)         | -0.064(.116)            |
| AuditoryLeftVentraldc            | 0.117    | 0.513         | -1.566      | -1.539         | -0.031(.170)         | -0.045(.158)            |
| AuditoryRightCerebellum          | 0.017    | 0.234         | 2.393       | 0.083          | -0.055(.157)         | -0.034(.150)            |
| AuditoryRightThalamus            | 0.304    | 0.768         | -1.029      | -2.225         | -0.095(.105)         | -0.101(.093)            |
| AuditoryRightCaudate             | 0.045    | 0.423         | -2.008      | -0.759         | -0.031(.139)         | -0.046(.125)            |
| AuditoryRightPutamen             | 0.321    | 0.772         | -0.993      | -2.286         | 0.141(.149)          | 0.134(.135)             |
| AuditoryRightPallidum            | 0.704    | 0.925         | 0.381       | -2.687         | 0.155(.111)          | 0.157(.103)             |
| AuditoryRightHippocampus         | 0.506    | 0.865         | 0.666       | -2.534         | 0.031(.171)          | 0.037(.154)             |
| AuditoryRightAmygdala            | 0.882    | 0.96          | 0.148       | -2.748         | -0.023(.101)         | -0.023(.096)            |
| AuditoryRightAccumbens           | 0.777    | 0.925         | 0.283       | -2.712         | -0.020(.097)         | -0.018(.090)            |
| AuditoryRightVentraldc           | 0.843    | 0.938         | -0.198      | -2.733         | -0.064(.090)         | -0.065(.087)            |
| CinguloOpercularLeftCerebellum   | 0.637    | 0.902         | -0.473      | -2.643         | 0.007(.058)          | 0.005(.054)             |
| CinguloOpercularLeftThalamus     | 0.757    | 0.925         | 0.31        | -2.696         | 0.065(.142)          | 0.067(.132)             |
| CinguloOpercularLeftCaudate      | 0.753    | 0.925         | -0.315      | -2.714         | 0.026(.127)          | 0.024(.117)             |
| CinguloOpercularLeftPutamen      | 0.4      | 0.838         | -0.841      | -2.412         | 0.113(.171)          | 0.105(.161)             |
| CinguloOpercularLeftPallidum     | 0.48     | 0.86          | 0.706       | -2.497         | 0.136(.155)          | 0.142(.148)             |
| CinguloOpercularBrainStem        | 0.298    | 0.768         | -1.041      | -2.218         | 0.029(.105)          | 0.023(.100)             |
| CinguloOpercularLeftHippocampus  | 0.225    | 0.695         | -1.214      | -2.014         | -0.006(.126)         | -0.014(.112)            |
| CinguloOpercularLeftAmygdala     | 0.361    | 0.798         | -0.913      | -2.344         | 0.061(.132)          | 0.055(.118)             |
| CinguloOpercularLeftAccumbens    | 0.811    | 0.925         | 0.24        | -2.723         | 0.099(.116)          | 0.101(.102)             |
| CinguloOpercularLeftVentraldc    | 0.426    | 0.853         | 0.796       | -2.436         | -0.078(.171)         | -0.070(.158)            |
| CinguloOpercularRightCerebellum  | 0.359    | 0.798         | 0.917       | -2.337         | 0.085(.097)          | 0.090(.097)             |
| CinguloOpercularRightThalamus    | 0.254    | 0.733         | 1.141       | -2.096         | -0.049(.094)         | -0.043(.091)            |
| CinguloOpercularRightCaudate     | 0.277    | 0.759         | 1.088       | -2.174         | 0.056(.099)          | 0.062(.092)             |
| CinguloOpercularRightPutamen     | 0.293    | 0.766         | -1.052      | -2.203         | 0.054(.058)          | 0.051(.054)             |
| CinguloOpercularRightPallidum    | 0.46     | 0.86          | -0.74       | -2.469         | -0.067(.132)         | -0.072(.127)            |
| CinguloOpercularRightHippocampus | 0.581    | 0.879         | -0.552      | -2.601         | -0.014(.122)         | -0.017(.111)            |
| CinguloOpercularRightAmygdala    | 0.71     | 0.925         | -0.372      | -2.677         | -0.033(.161)         | -0.037(.145)            |
| CinguloOpercularRightAccumbens   | 0.518    | 0.865         | 0.647       | -2.538         | 0.243(.158)          | 0.248(.140)             |
| CinguloOpercularRightVentraldc   | 0.473    | 0.86          | -0.718      | -2.499         | 0.128(.102)          | 0.124(.099)             |
| CinguloParietalLeftCerebellum    | 0.411    | 0.838         | -0.822      | -2.418         | -0.162(.127)         | -0.168(.121)            |
| CinguloParietalLeftThalamus      | 0.757    | 0.925         | -0.31       | -2.704         | 0.215(.132)          | 0.213(.123)             |
| CinguloParietalLeftCaudate       | 0.281    | 0.759         | -1.079      | -2.183         | 0.259(.113)          | 0.253(.103)             |
| CinguloParietalLeftPutamen       | 0.6      | 0.887         | 0.524       | -2.609         | -0.064(.152)         | -0.060(.148)            |
| CinguloParietalLeftPallidum      | 0.588    | 0.882         | -0.541      | -2.61          | -0.024(.099)         | -0.027(.099)            |
| CinguloParietalBrainStem         | 0.16     | 0.613         | 1.405       | -1.783         | -0.004(.096)         | 0.003(.091)             |

|                                    |          |               |               |             |                    |                    |
|------------------------------------|----------|---------------|---------------|-------------|--------------------|--------------------|
| CinguloParietalLeftHippocampus     | 0.898    | 0.964         | -0.129        | -2.74       | -0.018(.091)       | -0.019(.087)       |
| <b>CinguloParietalLeftAmygdala</b> | <b>0</b> | <b>0.014*</b> | <b>-3.825</b> | <b>4.45</b> | <b>0.025(.059)</b> | <b>0.013(.056)</b> |
| CinguloParietalLeftAccumbens       | 0.568    | 0.879         | -0.571        | -2.579      | -0.044(.148)       | -0.048(.131)       |
| CinguloParietalLeftVentraldc       | 0.805    | 0.925         | 0.247         | -2.728      | 0.092(.113)        | 0.093(.103)        |
| CinguloParietalRightCerebellum     | 0.179    | 0.641         | -1.344        | -1.864      | 0.160(.169)        | 0.148(.154)        |
| CinguloParietalRightThalamus       | 0.203    | 0.681         | -1.274        | -1.951      | 0.193(.166)        | 0.182(.150)        |
| CinguloParietalRightCaudate        | 0.05     | 0.423         | -1.965        | -0.852      | 0.097(.110)        | 0.085(.102)        |
| CinguloParietalRightPutamen        | 0.792    | 0.925         | 0.264         | -2.706      | -0.092(.117)       | -0.090(.115)       |
| CinguloParietalRightPallidum       | 0.603    | 0.887         | 0.521         | -2.617      | 0.122(.129)        | 0.126(.118)        |
| CinguloParietalRightHippocampus    | 0.926    | 0.97          | 0.093         | -2.747      | 0.153(.111)        | 0.153(.101)        |
| CinguloParietalRightAmygdala       | 0.776    | 0.925         | -0.284        | -2.701      | -0.044(.140)       | -0.046(.144)       |
| CinguloParietalRightAccumbens      | 0.614    | 0.895         | -0.504        | -2.627      | 0.001(.099)        | -0.002(.093)       |
| CinguloParietalRightVentraldc      | 0.985    | 0.993         | -0.019        | -2.753      | -0.022(.095)       | -0.022(.085)       |
| DefaultLeftCerebellum              | 0.785    | 0.925         | -0.273        | -2.702      | -0.005(.089)       | -0.006(.082)       |
| DefaultLeftThalamus                | 0.01     | 0.21          | -2.567        | 0.498       | 0.021(.061)        | 0.013(.052)        |
| DefaultLeftCaudate                 | 0.165    | 0.622         | 1.39          | -1.796      | -0.066(.140)       | -0.056(.133)       |
| DefaultLeftPutamen                 | 0.112    | 0.512         | -1.588        | -1.504      | 0.037(.108)        | 0.028(.098)        |
| DefaultLeftPallidum                | 0.754    | 0.925         | -0.314        | -2.714      | 0.118(.178)        | 0.116(.156)        |
| DefaultBrainStem                   | 0.234    | 0.709         | -1.19         | -2.042      | 0.147(.144)        | 0.138(.142)        |
| DefaultLeftHippocampus             | 0.516    | 0.865         | 0.65          | -2.537      | 0.064(.095)        | 0.067(.091)        |
| DefaultLeftAmygdala                | 0.426    | 0.853         | 0.795         | -2.426      | -0.082(.110)       | -0.077(.114)       |
| DefaultLeftAccumbens               | 0.319    | 0.772         | -0.996        | -2.272      | 0.078(.129)        | 0.072(.115)        |
| DefaultLeftVentraldc               | 0.055    | 0.425         | -1.921        | -0.936      | 0.073(.104)        | 0.062(.102)        |
| DefaultRightCerebellum             | 0.387    | 0.834         | 0.865         | -2.375      | 0.013(.166)        | 0.021(.149)        |
| DefaultRightThalamus               | 0.912    | 0.964         | 0.111         | -2.738      | -0.021(.100)       | -0.021(.090)       |
| DefaultRightCaudate                | 0.405    | 0.838         | -0.834        | -2.397      | -0.036(.090)       | -0.040(.083)       |
| DefaultRightPutamen                | 0.574    | 0.879         | -0.563        | -2.589      | -0.043(.092)       | -0.045(.084)       |
| DefaultRightPallidum               | 0.636    | 0.902         | -0.473        | -2.642      | 0.009(.065)        | 0.007(.062)        |
| DefaultRightHippocampus            | 0.014    | 0.232         | 2.469         | 0.273       | 0.053(.132)        | 0.072(.129)        |
| DefaultRightAmygdala               | 0.192    | 0.66          | -1.305        | -1.912      | -0.015(.112)       | -0.023(.102)       |
| DefaultRightAccumbens              | 0.645    | 0.904         | -0.461        | -2.653      | 0.081(.174)        | 0.077(.165)        |
| DefaultRightVentraldc              | 0.483    | 0.86          | -0.702        | -2.5        | 0.079(.152)        | 0.073(.150)        |
| DorsalAttentionLeftCerebellum      | 0.778    | 0.925         | -0.282        | -2.703      | -0.013(.104)       | -0.015(.093)       |
| DorsalAttentionLeftThalamus        | 0.261    | 0.745         | 1.125         | -2.112      | -0.013(.122)       | -0.006(.107)       |
| DorsalAttentionLeftCaudate         | 0.27     | 0.759         | -1.102        | -2.147      | 0.051(.118)        | 0.044(.109)        |
| DorsalAttentionLeftPutamen         | 0.052    | 0.423         | -1.941        | -0.898      | -0.072(.126)       | -0.084(.111)       |
| DorsalAttentionLeftPallidum        | 0.821    | 0.931         | 0.226         | -2.732      | 0.006(.178)        | 0.008(.164)        |
| DorsalAttentionBrainStem           | 0.1      | 0.512         | 1.643         | -1.42       | 0.122(.110)        | 0.133(.108)        |
| DorsalAttentionLeftHippocampus     | 0.046    | 0.423         | -1.997        | -0.788      | -0.117(.102)       | -0.128(.093)       |
| DorsalAttentionLeftAmygdala        | 0.944    | 0.978         | -0.07         | -2.753      | -0.063(.091)       | -0.063(.089)       |
| DorsalAttentionLeftAccumbens       | 0.594    | 0.882         | 0.534         | -2.613      | 0.139(.066)        | 0.141(.061)        |
| DorsalAttentionLeftVentraldc       | 0.052    | 0.423         | 1.94          | -0.9        | 0.270(.156)        | 0.286(.149)        |
| DorsalAttentionRightCerebellum     | 0.745    | 0.925         | -0.325        | -2.703      | 0.000(.102)        | -0.001(.098)       |
| DorsalAttentionRightThalamus       | 0.795    | 0.925         | 0.26          | -2.719      | -0.015(.155)       | -0.013(.141)       |
| DorsalAttentionRightCaudate        | 0.451    | 0.86          | -0.754        | -2.469      | 0.025(.169)        | 0.018(.151)        |
| DorsalAttentionRightPutamen        | 0.106    | 0.512         | -1.615        | -1.465      | 0.050(.104)        | 0.041(.094)        |
| DorsalAttentionRightPallidum       | 0.511    | 0.865         | 0.657         | -2.529      | -0.064(.125)       | -0.059(.114)       |
| DorsalAttentionRightHippocampus    | 0.51     | 0.865         | -0.659        | -2.54       | 0.063(.111)        | 0.059(.104)        |
| DorsalAttentionRightAmygdala       | 0.302    | 0.768         | -1.033        | -2.225      | -0.004(.109)       | -0.010(.102)       |
| DorsalAttentionRightAccumbens      | 0.062    | 0.425         | -1.87         | -1.022      | -0.066(.147)       | -0.082(.144)       |

|                                          |              |              |              |              |                    |                    |
|------------------------------------------|--------------|--------------|--------------|--------------|--------------------|--------------------|
| DorsalAttentionRightVentraldc            | 0.41         | 0.838        | -0.823       | -2.418       | 0.045(.094)        | 0.040(.088)        |
| FrontoParietalLeftCerebellum             | 0.622        | 0.899        | -0.493       | -2.627       | -0.054(.091)       | -0.057(.085)       |
| FrontoParietalLeftThalamus               | 0.266        | 0.752        | -1.114       | -2.137       | -0.059(.090)       | -0.064(.083)       |
| FrontoParietalLeftCaudate                | 0.858        | 0.944        | 0.179        | -2.743       | 0.087(.061)        | 0.088(.059)        |
| FrontoParietalLeftPutamen                | 0.533        | 0.865        | 0.624        | -2.549       | 0.106(.136)        | 0.111(.132)        |
| FrontoParietalLeftPallidum               | 0.629        | 0.899        | 0.484        | -2.631       | 0.014(.096)        | 0.017(.093)        |
| FrontoParietalBrainStem                  | 0.78         | 0.925        | -0.28        | -2.713       | 0.045(.159)        | 0.042(.141)        |
| FrontoParietalLeftHippocampus            | 0.083        | 0.461        | -1.736       | -1.258       | -0.019(.155)       | -0.034(.146)       |
| FrontoParietalLeftAmygdala               | 0.624        | 0.899        | 0.49         | -2.633       | 0.063(.100)        | 0.065(.090)        |
| FrontoParietalLeftAccumbens              | 0.184        | 0.641        | -1.328       | -1.867       | -0.044(.114)       | -0.053(.106)       |
| FrontoParietalLeftVentraldc              | 0.525        | 0.865        | 0.635        | -2.539       | 0.016(.108)        | 0.019(.096)        |
| FrontoParietalRightCerebellum            | 0.409        | 0.838        | -0.827       | -2.408       | 0.001(.107)        | -0.004(.093)       |
| FrontoParietalRightThalamus              | 0.515        | 0.865        | 0.652        | -2.534       | 0.018(.157)        | 0.023(.147)        |
| FrontoParietalRightCaudate               | 0.495        | 0.865        | 0.683        | -2.526       | 0.087(.094)        | 0.090(.096)        |
| FrontoParietalRightPutamen               | 0.831        | 0.931        | -0.213       | -2.725       | -0.072(.089)       | -0.073(.086)       |
| FrontoParietalRightPallidum              | 0.182        | 0.641        | -1.334       | -1.867       | -0.023(.089)       | -0.029(.082)       |
| FrontoParietalRightHippocampus           | 0.32         | 0.772        | -0.994       | -2.257       | 0.067(.061)        | 0.063(.056)        |
| FrontoParietalRightAmygdala              | 0.885        | 0.96         | 0.145        | -2.734       | 0.062(.134)        | 0.063(.125)        |
| FrontoParietalRightAccumbens             | 0.356        | 0.798        | -0.923       | -2.32        | 0.000(.096)        | -0.005(.090)       |
| FrontoParietalRightVentraldc             | 0.574        | 0.879        | 0.562        | -2.578       | -0.035(.140)       | -0.030(.128)       |
| RetrosplenialTemporalLeftCerebellum      | 0.008        | 0.181        | 2.642        | 0.684        | -0.033(.114)       | -0.018(.099)       |
| RetrosplenialTemporalLeftThalamus        | 0.702        | 0.925        | -0.383       | -2.679       | -0.047(.098)       | -0.049(.092)       |
| RetrosplenialTemporalLeftCaudate         | 0.155        | 0.601        | 1.422        | -1.752       | -0.040(.098)       | -0.033(.094)       |
| RetrosplenialTemporalLeftPutamen         | 0.728        | 0.925        | -0.347       | -2.694       | -0.020(.064)       | -0.022(.058)       |
| RetrosplenialTemporalLeftPallidum        | 0.25         | 0.728        | 1.151        | -2.097       | -0.088(.142)       | -0.079(.136)       |
| RetrosplenialTemporalBrainStem           | 0.745        | 0.925        | -0.325       | -2.708       | -0.051(.115)       | -0.053(.111)       |
| RetrosplenialTemporalLeftHippocampus     | 0.069        | 0.425        | -1.818       | -1.117       | -0.045(.173)       | -0.062(.158)       |
| RetrosplenialTemporalLeftAmygdala        | 0.477        | 0.86         | 0.711        | -2.495       | -0.062(.157)       | -0.056(.149)       |
| RetrosplenialTemporalLeftAccumbens       | 0.477        | 0.86         | 0.711        | -2.501       | -0.067(.102)       | -0.063(.097)       |
| RetrosplenialTemporalLeftVentraldc       | 0.527        | 0.865        | -0.633       | -2.553       | -0.095(.136)       | -0.100(.124)       |
| RetrosplenialTemporalRightCerebellum     | 0.834        | 0.931        | -0.209       | -2.746       | 0.126(.149)        | 0.125(.132)        |
| RetrosplenialTemporalRightThalamus       | 0.48         | 0.86         | -0.706       | -2.518       | 0.159(.113)        | 0.154(.108)        |
| <b>RetrosplenialTemporalRightCaudate</b> | <b>0.002</b> | <b>0.067</b> | <b>3.067</b> | <b>1.891</b> | <b>0.033(.164)</b> | <b>0.061(.156)</b> |
| RetrosplenialTemporalRightPutamen        | 0.884        | 0.96         | 0.145        | -2.747       | -0.027(.106)       | -0.026(.099)       |
| RetrosplenialTemporalRightPallidum       | 0.522        | 0.865        | 0.641        | -2.548       | -0.025(.096)       | -0.021(.091)       |
| RetrosplenialTemporalRightHippocampus    | 0.804        | 0.925        | 0.248        | -2.718       | -0.038(.096)       | -0.037(.091)       |
| RetrosplenialTemporalRightAmygdala       | 0.09         | 0.491        | -1.695       | -1.336       | 0.010(.061)        | 0.005(.056)        |
| RetrosplenialTemporalRightAccumbens      | 0.093        | 0.491        | 1.681        | -1.356       | 0.079(.138)        | 0.092(.133)        |
| RetrosplenialTemporalRightVentraldc      | 0.515        | 0.865        | -0.652       | -2.548       | 0.024(.129)        | 0.020(.118)        |
| SensorimotorHandLeftCerebellum           | 0.278        | 0.759        | -1.084       | -2.178       | 0.107(.183)        | 0.097(.163)        |
| SensorimotorHandLeftThalamus             | 0.067        | 0.425        | 1.836        | -1.081       | 0.137(.151)        | 0.152(.142)        |
| SensorimotorHandLeftCaudate              | 0.052        | 0.423        | -1.948       | -0.878       | 0.006(.115)        | -0.006(.103)       |
| SensorimotorHandLeftPutamen              | 0.362        | 0.798        | -0.911       | -2.336       | -0.002(.127)       | -0.008(.118)       |
| SensorimotorHandLeftPallidum             | 0.113        | 0.512        | -1.587       | -1.515       | 0.062(.129)        | 0.051(.123)        |
| SensorimotorHandBrainStem                | 0.218        | 0.689        | -1.231       | -2.014       | 0.113(.112)        | 0.106(.105)        |
| SensorimotorHandLeftHippocampus          | 0.987        | 0.993        | -0.017       | -2.756       | -0.053(.164)       | -0.053(.159)       |
| SensorimotorHandLeftAmygdala             | 0.318        | 0.772        | -0.999       | -2.265       | 0.077(.105)        | 0.071(.095)        |
| SensorimotorHandLeftAccumbens            | 0.786        | 0.925        | -0.272       | -2.703       | -0.039(.098)       | -0.040(.088)       |
| SensorimotorHandLeftVentraldc            | 0.583        | 0.879        | 0.549        | -2.601       | 0.080(.095)        | 0.083(.089)        |
| SensorimotorHandRightCerebellum          | 0.074        | 0.427        | -1.788       | -1.182       | 0.053(.060)        | 0.047(.057)        |

|                                      |          |               |               |              |                    |                    |
|--------------------------------------|----------|---------------|---------------|--------------|--------------------|--------------------|
| SensorimotorHandRightThalamus        | 0.103    | 0.512         | -1.632        | -1.422       | -0.063(.134)       | -0.075(.131)       |
| SensorimotorHandRightCaudate         | 0.58     | 0.879         | -0.553        | -2.61        | -0.021(.128)       | -0.025(.114)       |
| SensorimotorHandRightPutamen         | 0.733    | 0.925         | 0.341         | -2.698       | -0.035(.169)       | -0.032(.148)       |
| SensorimotorHandRightPallidum        | 0.686    | 0.925         | 0.404         | -2.669       | 0.249(.158)        | 0.253(.143)        |
| SensorimotorHandRightHippocampus     | 0.048    | 0.423         | -1.98         | -0.825       | 0.108(.102)        | 0.097(.099)        |
| SensorimotorHandRightAmygdala        | 0.092    | 0.491         | -1.686        | -1.351       | -0.149(.124)       | -0.161(.124)       |
| SensorimotorHandRightAccumbens       | 0.801    | 0.925         | -0.252        | -2.722       | 0.215(.129)        | 0.214(.125)        |
| SensorimotorHandRightVentraldc       | 0.152    | 0.601         | -1.432        | -1.748       | 0.265(.114)        | 0.257(.106)        |
| SensorimotorMouthLeftCerebellum      | 0.467    | 0.86          | 0.728         | -2.485       | -0.062(.154)       | -0.056(.144)       |
| SensorimotorMouthLeftThalamus        | 0.109    | 0.512         | -1.605        | -1.485       | -0.027(.101)       | -0.036(.098)       |
| SensorimotorMouthLeftCaudate         | 0.179    | 0.641         | 1.345         | -1.854       | 0.002(.091)        | 0.008(.085)        |
| SensorimotorMouthLeftPutamen         | 0.914    | 0.964         | 0.108         | -2.727       | -0.014(.084)       | -0.013(.083)       |
| <b>SensorimotorMouthLeftPallidum</b> | <b>0</b> | <b>0.019*</b> | <b>-3.669</b> | <b>3.876</b> | <b>0.021(.062)</b> | <b>0.009(.056)</b> |
| SensorimotorMouthBrainStem           | 0.073    | 0.427         | -1.793        | -1.16        | -0.038(.136)       | -0.052(.132)       |
| SensorimotorMouthLeftHippocampus     | 0.655    | 0.907         | -0.447        | -2.652       | 0.091(.103)        | 0.088(.103)        |
| SensorimotorMouthLeftAmygdala        | 0.476    | 0.86          | -0.712        | -2.501       | 0.170(.160)        | 0.164(.151)        |
| SensorimotorMouthLeftAccumbens       | 0.33     | 0.775         | -0.974        | -2.287       | 0.191(.155)        | 0.183(.151)        |
| SensorimotorMouthLeftVentraldc       | 0.153    | 0.601         | -1.431        | -1.747       | 0.085(.112)        | 0.077(.100)        |
| SensorimotorMouthRightCerebellum     | 0.809    | 0.925         | -0.241        | -2.713       | -0.075(.117)       | -0.077(.114)       |
| SensorimotorMouthRightThalamus       | 0.107    | 0.512         | -1.614        | -1.474       | 0.103(.127)        | 0.092(.114)        |
| SensorimotorMouthRightCaudate        | 0.899    | 0.964         | 0.127         | -2.751       | 0.145(.108)        | 0.146(.105)        |
| SensorimotorMouthRightPutamen        | 0.745    | 0.925         | 0.326         | -2.683       | -0.025(.143)       | -0.022(.140)       |
| SensorimotorMouthRightPallidum       | 0.062    | 0.425         | -1.864        | -1.035       | -0.015(.100)       | -0.025(.092)       |
| SensorimotorMouthRightHippocampus    | 0.667    | 0.911         | -0.43         | -2.654       | -0.006(.089)       | -0.008(.086)       |
| SensorimotorMouthRightAmygdala       | 0.509    | 0.865         | -0.66         | -2.532       | 0.008(.094)        | 0.005(.084)        |
| SensorimotorMouthRightAccumbens      | 0.221    | 0.689         | -1.225        | -1.999       | 0.008(.057)        | 0.005(.054)        |
| SensorimotorMouthRightVentraldc      | 0.231    | 0.708         | -1.197        | -2.031       | -0.045(.131)       | -0.054(.128)       |
| SaliencyLeftCerebellum               | 0.728    | 0.925         | -0.347        | -2.688       | 0.020(.109)        | 0.018(.099)        |
| SaliencyLeftThalamus                 | 0.566    | 0.879         | -0.573        | -2.58        | 0.097(.158)        | 0.092(.144)        |
| SaliencyLeftCaudate                  | 0.113    | 0.512         | -1.585        | -1.506       | 0.139(.149)        | 0.126(.143)        |
| SaliencyLeftPutamen                  | 0.465    | 0.86          | -0.731        | -2.485       | 0.036(.093)        | 0.032(.092)        |
| SaliencyLeftPallidum                 | 0.537    | 0.865         | 0.617         | -2.551       | -0.053(.114)       | -0.049(.113)       |
| SaliencyBrainStem                    | 0.072    | 0.427         | -1.798        | -1.15        | 0.055(.114)        | 0.044(.108)        |
| SaliencyLeftHippocampus              | 0.028    | 0.313         | -2.205        | -0.351       | -0.067(.115)       | -0.081(.104)       |
| SaliencyLeftAmygdala                 | 0.207    | 0.681         | 1.261         | -1.972       | 0.005(.170)        | 0.017(.159)        |
| SaliencyLeftAccumbens                | 0.663    | 0.91          | 0.436         | -2.667       | 0.110(.103)        | 0.113(.103)        |
| SaliencyLeftVentraldc                | 0.514    | 0.865         | 0.653         | -2.549       | -0.121(.098)       | -0.117(.092)       |
| SaliencyRightCerebellum              | 0.924    | 0.97          | 0.095         | -2.755       | -0.064(.089)       | -0.064(.087)       |
| SaliencyRightThalamus                | 0.533    | 0.865         | 0.624         | -2.568       | 0.135(.064)        | 0.137(.059)        |
| SaliencyRightCaudate                 | 0.042    | 0.423         | 2.033         | -0.721       | 0.291(.149)        | 0.309(.150)        |
| SaliencyRightPutamen                 | 0.682    | 0.924         | -0.409        | -2.664       | 0.007(.097)        | 0.005(.095)        |
| SaliencyRightPallidum                | 0.647    | 0.904         | -0.458        | -2.642       | -0.006(.152)       | -0.010(.143)       |
| SaliencyRightHippocampus             | 0.592    | 0.882         | -0.536        | -2.607       | 0.003(.164)        | -0.002(.146)       |
| SaliencyRightAmygdala                | 0.435    | 0.859         | -0.78         | -2.451       | 0.023(.099)        | 0.018(.093)        |
| SaliencyRightAccumbens               | 0.063    | 0.425         | 1.863         | -1.031       | -0.052(.120)       | -0.040(.115)       |
| SaliencyRightVentraldc               | 0.626    | 0.899         | -0.488        | -2.629       | 0.073(.111)        | 0.070(.103)        |
| VentralAttentionLeftCerebellum       | 0.059    | 0.425         | -1.892        | -0.991       | 0.007(.107)        | -0.004(.102)       |
| VentralAttentionLeftThalamus         | 0.901    | 0.964         | 0.124         | -2.741       | -0.088(.152)       | -0.087(.148)       |
| VentralAttentionLeftCaudate          | 0.832    | 0.931         | 0.213         | -2.733       | 0.028(.094)        | 0.029(.091)        |
| VentralAttentionLeftPutamen          | 0.949    | 0.978         | 0.063         | -2.753       | -0.055(.090)       | -0.054(.083)       |

|                                      |              |               |               |              |                     |                     |
|--------------------------------------|--------------|---------------|---------------|--------------|---------------------|---------------------|
| VentralAttentionLeftPallidum         | 0.481        | 0.86          | 0.705         | -2.505       | -0.066(.088)        | -0.063(.087)        |
| VentralAttentionBrainStem            | 0.711        | 0.925         | -0.371        | -2.687       | 0.084(.064)         | 0.083(.060)         |
| VentralAttentionLeftHippocampus      | 0.494        | 0.865         | 0.684         | -2.516       | 0.108(.137)         | 0.113(.136)         |
| VentralAttentionLeftAmygdala         | 0.022        | 0.273         | 2.287         | -0.173       | 0.010(.106)         | 0.023(.100)         |
| VentralAttentionLeftAccumbens        | 0.209        | 0.681         | -1.256        | -1.976       | 0.059(.159)         | 0.048(.145)         |
| <b>VentralAttentionLeftVentraldc</b> | <b>0.003</b> | <b>0.08</b>   | <b>-2.983</b> | <b>1.637</b> | <b>-0.023(.160)</b> | <b>-0.048(.142)</b> |
| VentralAttentionRightCerebellum      | 0.551        | 0.874         | 0.597         | -2.572       | 0.052(.097)         | 0.056(.090)         |
| VentralAttentionRightThalamus        | 0.782        | 0.925         | -0.277        | -2.704       | -0.038(.117)        | -0.040(.112)        |
| VentralAttentionRightCaudate         | 0.283        | 0.759         | -1.075        | -2.172       | 0.017(.104)         | 0.010(.099)         |
| VentralAttentionRightPutamen         | 0.17         | 0.635         | -1.372        | -1.81        | -0.001(.101)        | -0.008(.091)        |
| VentralAttentionRightPallidum        | 0.022        | 0.273         | 2.292         | -0.16        | 0.018(.152)         | 0.037(.145)         |
| VentralAttentionRightHippocampus     | 0.834        | 0.931         | 0.21          | -2.732       | 0.080(.098)         | 0.081(.089)         |
| VentralAttentionRightAmygdala        | 0.574        | 0.879         | -0.562        | -2.595       | -0.064(.095)        | -0.067(.086)        |
| VentralAttentionRightAccumbens       | 0.345        | 0.787         | 0.945         | -2.313       | -0.027(.086)        | -0.022(.080)        |
| VentralAttentionRightVentraldc       | 0.68         | 0.924         | -0.412        | -2.675       | 0.064(.059)         | 0.062(.055)         |
| VisualLeftCerebellum                 | 0.994        | 0.997         | 0.008         | -2.735       | 0.076(.127)         | 0.077(.129)         |
| VisualLeftThalamus                   | 0.398        | 0.838         | -0.846        | -2.378       | -0.001(.092)        | -0.005(.085)        |
| VisualLeftCaudate                    | 0.33         | 0.775         | -0.974        | -2.269       | -0.031(.146)        | -0.038(.135)        |
| VisualLeftPutamen                    | 0.069        | 0.425         | -1.817        | -1.114       | 0.128(.152)         | 0.113(.139)         |
| VisualLeftPallidum                   | 0.101        | 0.512         | -1.64         | -1.41        | 0.025(.090)         | 0.017(.084)         |
| VisualBrainStem                      | 0.998        | 0.998         | -0.002        | -2.743       | -0.062(.109)        | -0.063(.103)        |
| VisualLeftHippocampus                | 0.142        | 0.587         | -1.469        | -1.699       | 0.066(.126)         | 0.056(.115)         |
| VisualLeftAmygdala                   | 0.733        | 0.925         | -0.341        | -2.703       | 0.046(.115)         | 0.044(.100)         |
| VisualLeftAccumbens                  | 0.008        | 0.181         | 2.655         | 0.73         | 0.001(.158)         | 0.024(.154)         |
| VisualLeftVentraldc                  | 0.735        | 0.925         | 0.339         | -2.694       | 0.026(.101)         | 0.028(.092)         |
| VisualRightCerebellum                | 0.951        | 0.978         | -0.062        | -2.739       | -0.067(.087)        | -0.067(.090)        |
| VisualRightThalamus                  | 0.324        | 0.774         | 0.987         | -2.273       | -0.038(.093)        | -0.033(.087)        |
| VisualRightCaudate                   | 0.126        | 0.544         | -1.53         | -1.594       | 0.044(.059)         | 0.039(.055)         |
| <b>VisualRightPutamen</b>            | <b>0.001</b> | <b>0.024*</b> | <b>3.458</b>  | <b>3.146</b> | <b>0.073(.146)</b>  | <b>0.099(.133)</b>  |
| VisualRightPallidum                  | 0.961        | 0.983         | 0.049         | -2.757       | -0.026(.115)        | -0.025(.102)        |
| VisualRightHippocampus               | 0.291        | 0.766         | 1.056         | -2.208       | 0.015(.152)         | 0.024(.148)         |
| VisualRightAmygdala                  | 0.247        | 0.728         | 1.159         | -2.082       | 0.108(.152)         | 0.117(.142)         |
| VisualRightAccumbens                 | 0.013        | 0.232         | -2.487        | 0.296        | 0.019(.096)         | 0.005(.093)         |
| VisualRightVentraldc                 | 0.401        | 0.838         | 0.841         | -2.4         | -0.025(.127)        | -0.019(.119)        |
| WithinAuditory                       | 0.215        | 0.686         | 1.239         | -2.012       | 0.293(.098)         | 0.300(.089)         |
| WithinCinguloOpercula                | 0.039        | 0.408         | 2.068         | -0.66        | 0.282(.081)         | 0.291(.077)         |
| WithinCinguloParietal                | 0.115        | 0.512         | 1.575         | -1.551       | 0.746(.252)         | 0.767(.235)         |
| <b>WithinDefault</b>                 | <b>0</b>     | <b>0.02*</b>  | <b>3.605</b>  | <b>3.634</b> | <b>0.235(.071)</b>  | <b>0.249(.070)</b>  |
| WithinDorsalAttention                | 0.02         | 0.269         | 2.323         | -0.108       | 0.240(.081)         | 0.250(.078)         |
| <b>WithinFrontoParietal</b>          | <b>0</b>     | <b>0.022*</b> | <b>3.529</b>  | <b>3.372</b> | <b>0.193(.071)</b>  | <b>0.206(.067)</b>  |
| WithinRetrosplenialTemporal          | 0.008        | 0.181         | 2.662         | 0.726        | 0.503(.156)         | 0.525(.150)         |
| WithinSensorimotorHand               | 0.313        | 0.772         | 1.009         | -2.262       | 0.257(.080)         | 0.262(.078)         |
| WithinSensorimotorMouth              | 0.155        | 0.601         | 1.424         | -1.773       | 0.572(.184)         | 0.586(.172)         |
| WithinSalience                       | 0.206        | 0.681         | -1.264        | -1.973       | 0.402(.155)         | 0.391(.150)         |
| WithinVentralAttention               | 0.794        | 0.925         | 0.262         | -2.745       | 0.227(.077)         | 0.228(.072)         |
| WithinVisual                         | 0.464        | 0.86          | 0.733         | -2.514       | 0.411(.114)         | 0.416(.107)         |
| AuditoryCinguloOpercular             | 0.795        | 0.925         | 0.26          | -2.744       | 0.164(.070)         | 0.165(.067)         |
| AuditoryCinguloParietal              | 0.016        | 0.234         | -2.414        | 0.113        | -0.044(.089)        | -0.056(.086)        |
| AuditoryDefault                      | 0.439        | 0.86          | -0.774        | -2.468       | -0.040(.055)        | -0.043(.053)        |
| AuditoryDorsalAttention              | 0.984        | 0.993         | 0.02          | -2.763       | -0.029(.052)        | -0.029(.050)        |

|                                              |              |               |               |              |                     |                     |
|----------------------------------------------|--------------|---------------|---------------|--------------|---------------------|---------------------|
| AuditoryFrontoParietal                       | 0.426        | 0.853         | 0.796         | -2.452       | -0.043(.050)        | -0.040(.050)        |
| AuditoryRetrosplenialTemporal                | 0.016        | 0.234         | -2.414        | 0.119        | -0.026(.076)        | -0.037(.077)        |
| AuditorySensorimotorHand                     | 0.141        | 0.587         | 1.472         | -1.697       | 0.108(.071)         | 0.113(.068)         |
| AuditorySensorimotorMouth                    | 0.45         | 0.86          | 0.755         | -2.487       | 0.211(.099)         | 0.215(.092)         |
| AuditorySalience                             | 0.852        | 0.944         | -0.187        | -2.734       | 0.041(.088)         | 0.040(.087)         |
| AuditoryVentralAttention                     | 0.727        | 0.925         | -0.35         | -2.702       | 0.064(.060)         | 0.063(.058)         |
| AuditoryVisual                               | 0.929        | 0.97          | -0.089        | -2.758       | -0.046(.071)        | -0.046(.068)        |
| CinguloOpercularCinguloParietal              | 0.441        | 0.86          | -0.77         | -2.478       | 0.004(.092)         | 0.000(.082)         |
| <b>CinguloOpercularDefault</b>               | <b>0.001</b> | <b>0.043*</b> | <b>-3.26</b>  | <b>2.463</b> | <b>-0.091(.065)</b> | <b>-0.103(.064)</b> |
| CinguloOpercularDorsalAttention              | 0.301        | 0.768         | 1.034         | -2.239       | 0.075(.052)         | 0.078(.053)         |
| CinguloOpercularFrontoParietal               | 0.949        | 0.978         | -0.064        | -2.772       | -0.019(.053)        | -0.019(.052)        |
| <b>CinguloOpercularRetrosplenialTemporal</b> | <b>0</b>     | <b>0.002*</b> | <b>-4.497</b> | <b>7.195</b> | <b>-0.083(.079)</b> | <b>-0.102(.077)</b> |
| CinguloOpercularSensorimotorHand             | 0.069        | 0.425         | 1.817         | -1.139       | 0.079(.061)         | 0.084(.055)         |
| CinguloOpercularSensorimotorMouth            | 0.361        | 0.798         | -0.914        | -2.355       | 0.122(.086)         | 0.118(.079)         |
| CinguloOpercularSalience                     | 0.614        | 0.895         | 0.505         | -2.633       | 0.120(.087)         | 0.122(.083)         |
| CinguloOpercularVentralAttention             | 0.052        | 0.423         | -1.943        | -0.902       | 0.023(.060)         | 0.017(.058)         |
| CinguloOpercularVisual                       | 0.645        | 0.904         | -0.461        | -2.66        | -0.024(.069)        | -0.026(.067)        |
| CinguloParietalDefault                       | 0.982        | 0.993         | -0.023        | -2.765       | 0.021(.087)         | 0.021(.083)         |
| CinguloParietalDorsalAttention               | 0.552        | 0.874         | -0.596        | -2.586       | 0.006(.079)         | 0.004(.081)         |
| CinguloParietalFrontoParietal                | 0.655        | 0.907         | 0.447         | -2.665       | 0.032(.083)         | 0.034(.075)         |
| CinguloParietalRetrosplenialTemporal         | 0.705        | 0.925         | -0.379        | -2.694       | 0.126(.128)         | 0.123(.120)         |
| CinguloParietalSensorimotorHand              | 0.693        | 0.925         | -0.394        | -2.688       | -0.090(.085)        | -0.092(.078)        |
| CinguloParietalSensorimotorMouth             | 0.888        | 0.96          | -0.141        | -2.742       | -0.060(.115)        | -0.061(.112)        |
| CinguloParietalSalience                      | 0.572        | 0.879         | -0.565        | -2.601       | 0.097(.118)         | 0.093(.117)         |
| CinguloParietalVentralAttention              | 0.953        | 0.978         | 0.059         | -2.764       | -0.084(.087)        | -0.084(.079)        |
| CinguloParietalVisual                        | 0.064        | 0.425         | -1.853        | -1.073       | 0.070(.117)         | 0.059(.106)         |
| <b>DefaultDorsalAttention</b>                | <b>0.002</b> | <b>0.067</b>  | <b>-3.082</b> | <b>1.912</b> | <b>-0.119(.066)</b> | <b>-0.130(.063)</b> |
| DefaultFrontoParietal                        | 0.056        | 0.425         | -1.914        | -0.963       | 0.059(.053)         | 0.053(.052)         |
| DefaultRetrosplenialTemporal                 | 0.059        | 0.425         | 1.891         | -1.005       | 0.048(.070)         | 0.055(.069)         |
| DefaultSensorimotorHand                      | 0.716        | 0.925         | -0.364        | -2.703       | -0.048(.052)        | -0.049(.050)        |
| DefaultSensorimotorMouth                     | 0.153        | 0.601         | 1.43          | -1.757       | -0.084(.072)        | -0.079(.068)        |
| DefaultSalience                              | 0.43         | 0.855         | -0.789        | -2.459       | 0.086(.075)         | 0.083(.074)         |
| DefaultVentralAttention                      | 0.663        | 0.91          | 0.436         | -2.679       | 0.099(.061)         | 0.101(.057)         |
| DefaultVisual                                | 0.027        | 0.313         | -2.219        | -0.335       | -0.145(.062)        | -0.153(.064)        |
| DorsalAttentionFrontoParietal                | 0.115        | 0.512         | 1.577         | -1.541       | 0.043(.053)         | 0.047(.047)         |
| DorsalAttentionRetrosplenialTemporal         | 0.25         | 0.728         | -1.152        | -2.107       | 0.003(.067)         | -0.002(.068)        |
| DorsalAttentionSensorimotorHand              | 0.238        | 0.714         | 1.18          | -2.073       | 0.035(.048)         | 0.038(.047)         |
| DorsalAttentionSensorimotorMouth             | 0.017        | 0.234         | -2.398        | 0.07         | -0.012(.070)        | -0.021(.067)        |
| DorsalAttentionSalience                      | 0.176        | 0.641         | -1.355        | -1.853       | -0.041(.075)        | -0.046(.070)        |
| DorsalAttentionVentralAttention              | 0.334        | 0.775         | -0.966        | -2.306       | -0.081(.057)        | -0.084(.055)        |
| DorsalAttentionVisual                        | 0.983        | 0.993         | 0.021         | -2.759       | 0.041(.063)         | 0.041(.060)         |
| FrontoParietalRetrosplenialTemporal          | 0.797        | 0.925         | -0.257        | -2.729       | -0.069(.065)        | -0.070(.062)        |
| FrontoParietalSensorimotorHand               | 0.781        | 0.925         | -0.279        | -2.726       | -0.053(.053)        | -0.054(.049)        |
| FrontoParietalSensorimotorMouth              | 0.82         | 0.931         | -0.228        | -2.736       | -0.068(.068)        | -0.069(.063)        |
| FrontoParietalSalience                       | 0.857        | 0.944         | 0.18          | -2.748       | 0.076(.071)         | 0.076(.068)         |
| FrontoParietalVentralAttention               | 0.013        | 0.232         | -2.476        | 0.26         | 0.026(.048)         | 0.019(.048)         |
| FrontoParietalVisual                         | 0.206        | 0.681         | -1.264        | -1.976       | -0.111(.058)        | -0.115(.056)        |
| RetrosplenialTemporalSensorimotorHand        | 0.383        | 0.834         | 0.873         | -2.377       | -0.044(.061)        | -0.040(.064)        |
| RetrosplenialTemporalSensorimotorMouth       | 0.083        | 0.461         | -1.735        | -1.265       | -0.026(.098)        | -0.035(.094)        |
| RetrosplenialTemporalSalience                | 0.334        | 0.775         | -0.966        | -2.29        | -0.056(.110)        | -0.062(.102)        |

|                                       |       |       |        |        |              |              |
|---------------------------------------|-------|-------|--------|--------|--------------|--------------|
| RetrosplenialTemporalVentralAttention | 0.342 | 0.787 | -0.95  | -2.314 | -0.065(.077) | -0.069(.070) |
| RetrosplenialTemporalVisual           | 0.291 | 0.766 | -1.057 | -2.207 | 0.130(.095)  | 0.125(.087)  |
| SensorimotorHandSensorimotorMouth     | 0.732 | 0.925 | -0.342 | -2.709 | 0.086(.098)  | 0.084(.095)  |
| SensorimotorHandSalience              | 0.214 | 0.686 | 1.244  | -1.993 | -0.061(.075) | -0.055(.074) |
| SensorimotorHandVentralAttention      | 0.184 | 0.641 | 1.329  | -1.888 | -0.007(.056) | -0.003(.050) |
| SensorimotorHandVisual                | 0.909 | 0.964 | 0.114  | -2.749 | -0.055(.070) | -0.055(.063) |
| SensorimotorMouthSalience             | 0.39  | 0.834 | -0.86  | -2.389 | -0.032(.108) | -0.037(.104) |
| SensorimotorMouthVentralAttention     | 0.544 | 0.872 | -0.606 | -2.577 | 0.007(.074)  | 0.005(.068)  |
| SensorimotorMouthVisual               | 0.908 | 0.964 | -0.116 | -2.744 | 0.036(.086)  | 0.036(.086)  |
| SalienceVentralAttention              | 0.535 | 0.865 | -0.62  | -2.572 | 0.089(.076)  | 0.087(.073)  |
| SalienceVisual                        | 0.03  | 0.329 | -2.17  | -0.425 | -0.072(.090) | -0.082(.078) |
| VentralAttentionVisual                | 0.799 | 0.925 | 0.255  | -2.734 | -0.112(.065) | -0.111(.061) |

\* = qFDR < .05. Bold = qFDR < .05 or  $\ln(\text{BF}_{10}) > 1.1$ . The value of  $\ln(\text{BF}_{10}) > 1.1$  and  $< -1.2$  are interpreted as substantial evidence for the alternative (of there being a difference), and null hypotheses (of there being no difference), respectively.

**eTable 6.** Group differences between children with vs. without anhedonia during reward anticipation [Large Reward > Neutral Cue] in the MID task-fMRI activation

| Name: Network-ROI                   | x          | y          | z         | p            | q <sub>FDR</sub> | t           | ln(BF <sub>10</sub> ) | With Anhedonia M(SD) | Without Anhedonia M(SD) |
|-------------------------------------|------------|------------|-----------|--------------|------------------|-------------|-----------------------|----------------------|-------------------------|
| Auditory-lhHeschl                   | -32        | -29        | 16        | 0.013        | 0.107            | 2.47        | 0.48                  | -0.045(.258)         | -0.002(.236)            |
| Auditory-lhSupraMarginal            | -46        | -41        | 26        | 0.046        | 0.18             | 2           | -0.55                 | -0.046(.273)         | -0.008(.257)            |
| <b>Auditory-lhOpercularRolandic</b> | <b>-36</b> | <b>-34</b> | <b>20</b> | <b>0.004</b> | <b>0.06</b>      | <b>2.91</b> | <b>1.64</b>           | <b>-0.062(.295)</b>  | <b>-0.002(.274)</b>     |
| Auditory-lhSuperiorTemporal         | -53        | -21        | 5         | 0.024        | 0.144            | 2.25        | -0.02                 | -0.012(.198)         | 0.021(.205)             |
| Auditory-lhSuperiorTemporal         | -60        | -38        | 16        | 0.013        | 0.107            | 2.48        | 0.5                   | -0.039(.203)         | -0.002(.199)            |
| <b>Auditory-lhSuperiorTemporal</b>  | <b>-59</b> | <b>-30</b> | <b>11</b> | <b>0.001</b> | <b>0.046*</b>    | <b>3.19</b> | <b>2.48</b>           | <b>-0.041(.197)</b>  | <b>0.006(.201)</b>      |
| Auditory-lhSuperiorTemporal         | -41        | -38        | 14        | 0.508        | 0.659            | 0.66        | -2.28                 | -0.011(.240)         | 0.001(.240)             |
| Auditory-lhInsula                   | -34        | -22        | 10        | 0.054        | 0.182            | 1.93        | -0.68                 | -0.035(.214)         | -0.005(.214)            |
| Auditory-lhInsula                   | -37        | -14        | 19        | 0.275        | 0.45             | 1.09        | -1.93                 | -0.045(.225)         | -0.026(.242)            |
| Auditory-lhOpercularRolandic        | -52        | -14        | 15        | 0.763        | 0.856            | -0.3        | -2.47                 | -0.020(.267)         | -0.026(.284)            |
| Auditory-lhSupraMarginal            | -51        | -22        | 19        | 0.71         | 0.817            | 0.37        | -2.44                 | -0.020(.218)         | -0.014(.224)            |
| Auditory-lhSuperiorTemporal         | -54        | -1         | -1        | 0.978        | 0.984            | 0.03        | -2.5                  | -0.009(.182)         | -0.008(.171)            |
| Auditory-rhInsula                   | 34         | -22        | 13        | 0.077        | 0.219            | 1.77        | -0.98                 | -0.041(.233)         | -0.013(.215)            |
| Auditory-rhOpercularRolandic        | 36         | -31        | 19        | 0.244        | 0.428            | 1.17        | -1.83                 | -0.036(.249)         | -0.015(.234)            |
| Auditory-rhSuperiorTemporal         | 54         | -16        | 5         | 0.035        | 0.158            | 2.12        | -0.31                 | -0.024(.217)         | 0.009(.210)             |
| Auditory-rhSuperiorTemporal         | 59         | -39        | 15        | 0.019        | 0.126            | 2.34        | 0.18                  | -0.028(.209)         | 0.004(.186)             |
| Auditory-rhSuperiorTemporal         | 62         | -24        | 1         | 0.1          | 0.255            | 1.64        | -1.16                 | -0.029(.225)         | -0.004(.207)            |
| Auditory-rhSuperiorTemporal         | 60         | -25        | 10        | 0.292        | 0.464            | 1.05        | -1.95                 | -0.025(.209)         | -0.010(.193)            |
| <b>Auditory-rhInsula</b>            | <b>38</b>  | <b>-12</b> | <b>20</b> | <b>0.003</b> | <b>0.06</b>      | <b>2.97</b> | <b>1.81</b>           | <b>-0.098(.267)</b>  | <b>-0.040(.267)</b>     |
| Auditory-rhInsula                   | 37         | -10        | 12        | 0.25         | 0.429            | 1.15        | -1.86                 | -0.033(.251)         | -0.013(.247)            |
| Auditory-rhOpercularRolandic        | 61         | -2         | 11        | 0.299        | 0.469            | 1.04        | -1.97                 | -0.033(.267)         | -0.013(.267)            |
| Auditory-rhOpercularRolandic        | 54         | -14        | 17        | 0.254        | 0.434            | 1.14        | -1.87                 | -0.054(.257)         | -0.034(.245)            |
| Auditory-rhSuperiorTemporal         | 40         | -22        | 3         | 0.914        | 0.938            | -0.11       | -2.48                 | -0.022(.434)         | -0.025(.374)            |
| Auditory-rhSuperiorTemporal         | 56         | 2          | -2        | 0.74         | 0.838            | -0.33       | -2.43                 | -0.001(.162)         | -0.005(.161)            |
| CinguloOperc-lhMiddleCingulum       | -17        | -36        | 43        | 0.032        | 0.155            | 2.15        | -0.25                 | -0.035(.192)         | -0.007(.176)            |

|                                                 |           |            |           |              |              |             |             |                     |                     |
|-------------------------------------------------|-----------|------------|-----------|--------------|--------------|-------------|-------------|---------------------|---------------------|
| CinguloOperc-<br>lhMiddleCingulum               | -9        | 0          | 43        | 0.02         | 0.126        | 2.33        | 0.15        | 0.015(.179)         | 0.044(.170)         |
| CinguloOperc-<br>lhMiddleCingulum               | -8        | 15         | 34        | 0.007        | 0.086        | 2.72        | 1.1         | 0.005(.207)         | 0.044(.192)         |
| CinguloOperc-<br>lhAnteriorCingulum             | -9        | 25         | 28        | 0.275        | 0.45         | 1.09        | -1.92       | 0.035(.256)         | 0.055(.245)         |
| CinguloOperc-<br>lhSupplementaryMot<br>or       | -8        | -9         | 63        | 0.263        | 0.445        | 1.12        | -1.9        | 0.038(.163)         | 0.051(.163)         |
| CinguloOperc-<br>lhPrecentral                   | -42       | -4         | 47        | 0.735        | 0.834        | 0.34        | -2.44       | 0.034(.224)         | 0.039(.207)         |
| CinguloOperc-<br>lhSupraMarginal                | -58       | -41        | 36        | 0.309        | 0.477        | 1.02        | -2          | -0.024(.192)        | -0.010(.194)        |
| CinguloOperc-<br>lhSuperiorTemporal             | -39       | -16        | -5        | 0.063        | 0.189        | 1.86        | -0.8        | -0.045(.200)        | -0.019(.189)        |
| CinguloOperc-<br>lhInsula                       | -39       | -2         | -12       | 0.067        | 0.197        | 1.83        | -0.86       | -0.033(.184)        | -0.008(.185)        |
| CinguloOperc-<br>lhInsula                       | -38       | 3          | 12        | 0.094        | 0.247        | 1.67        | -1.13       | 0.006(.184)         | 0.028(.184)         |
| CinguloOperc-<br>lhInsula                       | -37       | 1          | 6         | 0.052        | 0.18         | 1.95        | -0.66       | -0.015(.193)        | 0.012(.197)         |
| CinguloOperc-<br>lhInsula                       | -37       | 9          | -1        | 0.766        | 0.856        | -0.3        | -2.46       | 0.033(.218)         | 0.029(.202)         |
| CinguloOperc-<br>lhInsula                       | -29       | 24         | 8         | 0.647        | 0.767        | 0.46        | -2.4        | 0.080(.204)         | 0.087(.200)         |
| CinguloOperc-<br>lhOpercularRolandic            | -60       | -4         | 9         | 0.215        | 0.401        | 1.24        | -1.76       | -0.047(.283)        | -0.022(.272)        |
| CinguloOperc-<br>lhSuperiorTemporal             | -55       | -32        | 23        | 0.121        | 0.285        | 1.55        | -1.33       | -0.058(.217)        | -0.034(.220)        |
| CinguloOperc-<br>lhSupraMarginal                | -59       | -24        | 31        | 0.085        | 0.231        | 1.72        | -1.06       | -0.034(.188)        | -0.010(.192)        |
| CinguloOperc-<br>lhOpercularRolandic            | -52       | -1         | 5         | 0.019        | 0.126        | 2.35        | 0.19        | -0.016(.235)        | 0.021(.213)         |
| CinguloOperc-<br>lhOpercularInferiorFr<br>ontal | -49       | 8          | 11        | 0.198        | 0.385        | 1.29        | -1.7        | -0.021(.203)        | -0.003(.196)        |
| CinguloOperc-<br>lhMiddleFrontal                | -27       | 47         | 21        | 0.022        | 0.133        | 2.3         | 0.08        | -0.026(.274)        | 0.014(.236)         |
| CinguloOperc-<br>lhMiddleFrontal                | -29       | 38         | 28        | 0.059        | 0.189        | 1.89        | -0.75       | -0.023(.216)        | 0.007(.210)         |
| <b>CinguloOperc-<br/>rhMiddleCingulum</b>       | <b>16</b> | <b>-33</b> | <b>43</b> | <b>0.003</b> | <b>0.06</b>  | <b>2.96</b> | <b>1.77</b> | <b>-0.038(.180)</b> | <b>-0.001(.173)</b> |
| CinguloOperc-<br>rhSupplementaryMot<br>or       | 7         | 5          | 56        | 0.05         | 0.18         | 1.96        | -0.61       | 0.053(.202)         | 0.081(.197)         |
| <b>CinguloOperc-<br/>rhMiddleCingulum</b>       | <b>9</b>  | <b>4</b>   | <b>40</b> | <b>0.005</b> | <b>0.073</b> | <b>2.83</b> | <b>1.4</b>  | <b>0.008(.186)</b>  | <b>0.044(.175)</b>  |
| CinguloOperc-<br>rhMiddleCingulum               | 9         | 11         | 46        | 0.227        | 0.411        | 1.21        | -1.78       | 0.053(.235)         | 0.071(.206)         |
| CinguloOperc-<br>rhMiddleCingulum               | 6         | 22         | 32        | 0.01         | 0.092        | 2.59        | 0.77        | 0.022(.204)         | 0.060(.202)         |

|                                           |           |            |           |              |               |             |             |                     |                     |
|-------------------------------------------|-----------|------------|-----------|--------------|---------------|-------------|-------------|---------------------|---------------------|
| CinguloOperc-<br>rhSupplementaryMot<br>or | 16        | 1          | 68        | 0.209        | 0.394         | 1.26        | -1.73       | 0.020(.160)         | 0.035(.163)         |
| CinguloOperc-<br>rhSupplementaryMot<br>or | 8         | -6         | 64        | 0.016        | 0.115         | 2.4         | 0.33        | 0.027(.167)         | 0.056(.163)         |
| CinguloOperc-<br>rhPrecentral             | 42        | -2         | 47        | 0.008        | 0.092         | 2.64        | 0.91        | 0.008(.179)         | 0.047(.196)         |
| CinguloOperc-<br>rhSupraMarginal          | 58        | -40        | 35        | 0.102        | 0.255         | 1.64        | -1.19       | -0.004(.178)        | 0.017(.177)         |
| <b>CinguloOperc-<br/>rhSupraMarginal</b>  | <b>55</b> | <b>-27</b> | <b>30</b> | <b>0.001</b> | <b>0.046*</b> | <b>3.21</b> | <b>2.53</b> | <b>-0.063(.186)</b> | <b>-0.022(.178)</b> |
| CinguloOperc-<br>rhInsula                 | 39        | -14        | -5        | 0.041        | 0.171         | 2.04        | -0.47       | -0.043(.204)        | -0.015(.191)        |
| CinguloOperc-<br>rhInsula                 | 40        | 1          | -13       | 0.233        | 0.417         | 1.19        | -1.8        | -0.022(.219)        | -0.003(.208)        |
| CinguloOperc-<br>rhInsula                 | 37        | 5          | 13        | 0.016        | 0.115         | 2.41        | 0.34        | -0.008(.199)        | 0.028(.203)         |
| CinguloOperc-<br>rhInsula                 | 40        | 10         | -2        | 0.536        | 0.681         | 0.62        | -2.31       | 0.038(.186)         | 0.047(.186)         |
| CinguloOperc-<br>rhInsula                 | 36        | 6          | 6         | 0.034        | 0.158         | 2.12        | -0.31       | -0.002(.197)        | 0.027(.188)         |
| CinguloOperc-<br>rhInsula                 | 34        | 23         | 4         | 0.062        | 0.189         | 1.87        | -0.79       | 0.115(.279)         | 0.149(.246)         |
| CinguloOperc-<br>rhInsula                 | 34        | 24         | 10        | 0.125        | 0.291         | 1.54        | -1.35       | 0.072(.235)         | 0.097(.216)         |
| CinguloOperc-<br>rhOpercularRolandic      | 50        | 3          | 4         | 0.208        | 0.394         | 1.26        | -1.72       | 0.011(.203)         | 0.028(.190)         |
| CinguloOperc-<br>rhSuperiorFrontal        | 24        | 51         | 24        | 0.009        | 0.092         | 2.61        | 0.84        | -0.043(.244)        | 0.001(.228)         |
| CinguloOperc-<br>rhMiddleFrontal          | 31        | 40         | 26        | 0.052        | 0.18          | 1.95        | -0.65       | -0.006(.229)        | 0.024(.208)         |
| CinguloParietal-<br>lhMiddleCingulum      | -6        | -26        | 28        | 0.877        | 0.916         | -0.16       | -2.5        | 0.039(.276)         | 0.036(.258)         |
| CinguloParietal-<br>lhPrecuneus           | -13       | -65        | 32        | 0.171        | 0.349         | 1.37        | -1.58       | -0.034(.262)        | -0.009(.246)        |
| CinguloParietal-<br>lhPrecuneus           | -11       | -73        | 43        | 0.084        | 0.23          | 1.73        | -1.05       | -0.018(.248)        | 0.012(.237)         |
| CinguloParietal-<br>rhMiddleCingulum      | 8         | -27        | 28        | 0.613        | 0.739         | 0.51        | -2.38       | 0.032(.289)         | 0.042(.262)         |
| CinguloParietal-<br>rhCuneus              | 16        | -70        | 40        | 0.22         | 0.406         | 1.23        | -1.77       | 0.003(.236)         | 0.023(.223)         |
| Default-lhPrecuneus                       | -11       | -52        | 36        | 0.007        | 0.086         | 2.68        | 1.01        | -0.035(.200)        | 0.004(.200)         |
| Default-<br>lhSuperiorFrontal             | -12       | 27         | 57        | 0.02         | 0.126         | 2.33        | 0.15        | -0.035(.155)        | -0.010(.152)        |
| Default-lhAngular                         | -47       | -58        | 31        | 0.037        | 0.162         | 2.09        | -0.37       | -0.032(.183)        | -0.004(.183)        |
| Default-<br>lhMedialSuperiorFro<br>ntal   | -6        | 42         | 35        | 0.05         | 0.18          | 1.96        | -0.63       | -0.019(.203)        | 0.008(.190)         |
| Default-<br>lhMiddleCingulum              | -2        | -18        | 39        | 0.988        | 0.991         | 0.01        | -2.5        | 0.007(.224)         | 0.007(.212)         |

|                                        |           |           |           |              |               |             |             |                     |                     |
|----------------------------------------|-----------|-----------|-----------|--------------|---------------|-------------|-------------|---------------------|---------------------|
| Default-lhSuperiorFrontal              | -20       | 30        | 46        | 0.155        | 0.331         | 1.42        | -1.51       | -0.002(.162)        | 0.015(.165)         |
| Default-lhMiddleOccipital              | -39       | -74       | 38        | 0.268        | 0.449         | 1.11        | -1.9        | -0.006(.193)        | 0.010(.197)         |
| Default-lhOrbitalSuperiorFrontal       | -28       | 54        | 0         | 0.247        | 0.428         | 1.16        | -1.84       | 0.016(.344)         | 0.044(.332)         |
| Default-lhOrbitalMedialFrontal         | -6        | 55        | -11       | 0.833        | 0.899         | 0.21        | -2.47       | -0.050(.407)        | -0.044(.385)        |
| Default-lhOrbitalMedialFrontal         | -7        | 38        | -9        | 0.322        | 0.487         | 0.99        | -2.01       | -0.008(.351)        | 0.017(.338)         |
| Default-lhMiddleTemporal               | -63       | -29       | -7        | 0.152        | 0.327         | 1.43        | -1.47       | -0.018(.295)        | 0.012(.275)         |
| Default-lhMiddleTemporal               | -53       | -11       | -16       | 0.655        | 0.771         | -0.45       | -2.39       | -0.028(.233)        | -0.035(.220)        |
| Default-lhSuperiorFrontal              | -16       | 49        | 37        | 0.523        | 0.675         | 0.64        | -2.29       | -0.018(.197)        | -0.009(.192)        |
| Default-lhSuperiorFrontal              | -20       | 56        | 28        | 0.18         | 0.358         | 1.34        | -1.61       | -0.038(.221)        | -0.018(.205)        |
| <b>Default-lhMedialSuperiorFrontal</b> | <b>-6</b> | <b>55</b> | <b>18</b> | <b>0.001</b> | <b>0.034*</b> | <b>3.43</b> | <b>3.25</b> | <b>-0.053(.224)</b> | <b>-0.002(.201)</b> |
| Default-lhSuperiorFrontal              | -16       | 65        | 14        | 0.634        | 0.759         | 0.48        | -2.38       | -0.001(.306)        | 0.009(.303)         |
| Default-lhAnteriorCingulum             | -6        | 45        | 6         | 0.305        | 0.475         | 1.03        | -1.99       | 0.030(.234)         | 0.047(.217)         |
| Default-lhMiddleFrontal                | -26       | 27        | 39        | 0.422        | 0.58          | 0.8         | -2.18       | -0.008(.219)        | 0.004(.204)         |
| Default-lhMiddleFrontal                | -29       | 17        | 51        | 0.105        | 0.257         | 1.62        | -1.21       | 0.019(.213)         | 0.041(.187)         |
| Default-lhMiddleFrontal                | -42       | 16        | 48        | 0.543        | 0.683         | 0.61        | -2.32       | -0.000(.177)        | 0.008(.182)         |
| Default-rhPrecuneus                    | 12        | -52       | 34        | 0.038        | 0.164         | 2.08        | -0.4        | -0.032(.188)        | -0.003(.192)        |
| Default-rhSupplementaryMotor           | 12        | 22        | 60        | 0.033        | 0.157         | 2.14        | -0.26       | -0.042(.143)        | -0.019(.144)        |
| Default-rhAnteriorCingulum             | 8         | 44        | 6         | 0.864        | 0.914         | 0.17        | -2.48       | 0.049(.226)         | 0.052(.212)         |
| Default-rhMiddleCingulum               | 3         | -20       | 38        | 0.951        | 0.962         | 0.06        | -2.51       | -0.004(.246)        | -0.003(.225)        |
| Default-rhSuperiorFrontal              | 22        | 21        | 46        | 0.128        | 0.294         | 1.52        | -1.37       | -0.007(.164)        | 0.012(.172)         |
| Default-rhAngular                      | 49        | -53       | 29        | 0.062        | 0.189         | 1.87        | -0.8        | -0.041(.181)        | -0.015(.186)        |
| Default-rhMiddleTemporal               | 62        | -26       | -6        | 0.097        | 0.254         | 1.66        | -1.14       | -0.029(.218)        | 0.000(.238)         |
| Default-rhPrecuneus                    | 7         | -69       | 50        | 0.314        | 0.481         | 1.01        | -1.99       | 0.026(.261)         | 0.046(.268)         |
| Default-rhAngular                      | 46        | -67       | 36        | 0.364        | 0.521         | 0.91        | -2.09       | -0.000(.172)        | 0.012(.189)         |
| Default-rhOrbitalMedialFrontal         | 5         | 65        | -7        | 0.044        | 0.176         | 2.02        | -0.47       | -0.081(.427)        | -0.015(.423)        |

|                                                  |          |           |            |              |              |             |             |                     |                     |
|--------------------------------------------------|----------|-----------|------------|--------------|--------------|-------------|-------------|---------------------|---------------------|
| <b>Default-<br/>rhOrbitalMedialFron<br/>tal</b>  | <b>7</b> | <b>48</b> | <b>-10</b> | <b>0.006</b> | <b>0.083</b> | <b>2.74</b> | <b>1.19</b> | <b>-0.122(.389)</b> | <b>-0.046(.372)</b> |
| Default-<br>rhMiddleTemporal                     | 58       | -7        | -16        | 0.857        | 0.914        | -0.18       | -2.45       | -0.025(.241)        | -0.028(.218)        |
| Default-<br>rhMiddleFrontal                      | 21       | 33        | 42         | 0.017        | 0.115        | 2.39        | 0.3         | -0.031(.175)        | 0.000(.178)         |
| Default-<br>rhSuperiorFrontal                    | 21       | 43        | 35         | 0.034        | 0.158        | 2.12        | -0.29       | -0.030(.197)        | 0.001(.197)         |
| Default-<br>rhSuperiorFrontal                    | 16       | 61        | 20         | 0.049        | 0.18         | 1.97        | -0.6        | -0.051(.261)        | -0.015(.244)        |
| <b>Default-<br/>rhMedialSuperiorFro<br/>ntal</b> | <b>8</b> | <b>54</b> | <b>14</b>  | <b>0.004</b> | <b>0.06</b>  | <b>2.9</b>  | <b>1.61</b> | <b>-0.053(.228)</b> | <b>-0.009(.204)</b> |
| Default-<br>rhMedialSuperiorFro<br>ntal          | 6        | 55        | 29         | 0.217        | 0.401        | 1.24        | -1.74       | -0.054(.242)        | -0.034(.214)        |
| Default-<br>rhSuperiorFrontal                    | 14       | 47        | 42         | 0.222        | 0.407        | 1.22        | -1.78       | -0.035(.188)        | -0.018(.183)        |
| Default-<br>rhMedialSuperiorFro<br>ntal          | 7        | 44        | 35         | 0.045        | 0.179        | 2.01        | -0.53       | -0.013(.179)        | 0.014(.183)         |
| Default-<br>rhMiddleFrontal                      | 31       | 19        | 49         | 0.837        | 0.899        | 0.21        | -2.47       | 0.029(.195)         | 0.032(.202)         |
| Default-<br>rhSuperiorTemporal                   | 54       | 1         | -13        | 0.276        | 0.45         | 1.09        | -1.91       | -0.031(.230)        | -0.013(.220)        |
| DorsalAttn-<br>lhPrecentral                      | -27      | -7        | 46         | 0.03         | 0.154        | 2.17        | -0.19       | 0.002(.173)         | 0.030(.179)         |
| DorsalAttn-<br>lhMiddleFrontal                   | -27      | 2         | 53         | 0.107        | 0.258        | 1.61        | -1.22       | 0.006(.179)         | 0.027(.171)         |
| DorsalAttn-<br>lhSuperiorFrontal                 | -20      | 6         | 56         | 0.194        | 0.38         | 1.3         | -1.67       | 0.004(.184)         | 0.021(.182)         |
| DorsalAttn-<br>lhSuperiorFrontal                 | -21      | 0         | 63         | 0.397        | 0.554        | 0.85        | -2.14       | 0.011(.167)         | 0.020(.154)         |
| DorsalAttn-<br>lhInferiorParietal                | -31      | -49       | 47         | 0.173        | 0.351        | 1.36        | -1.61       | 0.019(.204)         | 0.038(.195)         |
| DorsalAttn-<br>lhInferiorParietal                | -43      | -45       | 43         | 0.498        | 0.657        | -0.68       | -2.27       | 0.096(.206)         | 0.086(.196)         |
| DorsalAttn-<br>lhInferiorParietal                | -52      | -31       | 40         | 0.487        | 0.644        | 0.7         | -2.27       | 0.012(.186)         | 0.022(.190)         |
| DorsalAttn-<br>lhTriangularInferiorFr<br>ontal   | -44      | 36        | 8          | 0.875        | 0.916        | 0.16        | -2.5        | -0.036(.251)        | -0.033(.260)        |
| DorsalAttn-<br>lhSuperiorParietal                | -20      | -65       | 51         | 0.05         | 0.18         | 1.96        | -0.61       | -0.020(.223)        | 0.010(.201)         |
| DorsalAttn-<br>lhMiddleOccipital                 | -26      | -65       | 32         | 0.024        | 0.143        | 2.26        | 0           | 0.011(.225)         | 0.047(.218)         |
| DorsalAttn-<br>lhPrecuneus                       | -10      | -57       | 60         | 0.018        | 0.12         | 2.37        | 0.26        | -0.029(.203)        | 0.003(.183)         |
| DorsalAttn-<br>lhPrecuneus                       | -7       | -64       | 55         | 0.025        | 0.145        | 2.24        | -0.03       | -0.010(.221)        | 0.029(.239)         |

|                                                |            |            |           |              |               |             |             |                     |                    |
|------------------------------------------------|------------|------------|-----------|--------------|---------------|-------------|-------------|---------------------|--------------------|
| DorsalAttn-<br>lhMiddleOccipital               | -30        | -74        | 36        | 0.101        | 0.255         | 1.64        | -1.19       | 0.023(.235)         | 0.050(.228)        |
| DorsalAttn-<br>lhInferiorTemporal              | -46        | -58        | -8        | 0.763        | 0.856         | -0.3        | -2.45       | 0.001(.170)         | -0.003(.181)       |
| DorsalAttn-<br>lhPrecentral                    | -45        | 3          | 32        | 0.32         | 0.485         | 1           | -2.02       | 0.022(.213)         | 0.037(.210)        |
| DorsalAttn-<br>lhPrecentral                    | -35        | 6          | 34        | 0.035        | 0.158         | 2.11        | -0.33       | -0.010(.289)        | 0.032(.274)        |
| DorsalAttn-<br>lhMiddleFrontal                 | -38        | 38         | 17        | 0.087        | 0.233         | 1.71        | -1.08       | 0.011(.252)         | 0.041(.240)        |
| DorsalAttn-<br>lhOpercularInferiorFr<br>ontal  | -42        | 9          | 22        | 0.176        | 0.355         | -1.35       | -1.61       | 0.040(.232)         | 0.016(.249)        |
| DorsalAttn-<br>lhMiddleFrontal                 | -36        | 33         | 32        | 0.577        | 0.717         | 0.56        | -2.34       | 0.015(.217)         | 0.023(.206)        |
| DorsalAttn-<br>rhPrecuneus                     | 10         | -57        | 58        | 0.061        | 0.189         | 1.88        | -0.77       | -0.015(.191)        | 0.011(.186)        |
| DorsalAttn-<br>rhMiddleFrontal                 | 29         | 2          | 52        | 0.072        | 0.207         | 1.8         | -0.92       | 0.011(.166)         | 0.034(.168)        |
| <b>DorsalAttn-<br/>rhPrecentral</b>            | <b>30</b>  | <b>-8</b>  | <b>47</b> | <b>0.002</b> | <b>0.051</b>  | <b>3.11</b> | <b>2.25</b> | <b>-0.006(.199)</b> | <b>0.038(.190)</b> |
| DorsalAttn-<br>rhSuperiorFrontal               | 23         | 6          | 58        | 0.034        | 0.158         | 2.12        | -0.3        | 0.010(.166)         | 0.037(.169)        |
| DorsalAttn-<br>rhInferiorParietal              | 39         | -43        | 40        | 0.582        | 0.719         | 0.55        | -2.35       | 0.085(.208)         | 0.094(.213)        |
| DorsalAttn-<br>rhMiddleFrontal                 | 37         | 38         | 13        | 0.534        | 0.681         | -0.62       | -2.32       | 0.070(.243)         | 0.060(.227)        |
| DorsalAttn-<br>rhTriangularInferiorF<br>rontal | 48         | 38         | 2         | 0.271        | 0.45          | 1.1         | -1.9        | -0.070(.301)        | -0.047(.291)       |
| <b>DorsalAttn-<br/>rhSuperiorParietal</b>      | <b>23</b>  | <b>-66</b> | <b>52</b> | <b>0</b>     | <b>0.033*</b> | <b>3.56</b> | <b>3.7</b>  | <b>-0.035(.227)</b> | <b>0.019(.201)</b> |
| DorsalAttn-<br>rhMiddleOccipital               | 32         | -64        | 34        | 0.039        | 0.164         | 2.07        | -0.41       | 0.036(.227)         | 0.069(.215)        |
| DorsalAttn-<br>rhInferiorParietal              | 34         | -48        | 49        | 0.605        | 0.734         | 0.52        | -2.37       | 0.054(.199)         | 0.062(.200)        |
| DorsalAttn-<br>rhMiddleTemporal                | 57         | -54        | -1        | 0.453        | 0.611         | -0.75       | -2.21       | 0.021(.206)         | 0.010(.214)        |
| DorsalAttn-<br>rhPrecentral                    | 47         | 2          | 38        | 0.076        | 0.217         | 1.78        | -0.96       | 0.040(.221)         | 0.069(.223)        |
| DorsalAttn-<br>rhOpercularInferiorFr<br>ontal  | 47         | 8          | 19        | 0.016        | 0.115         | 2.41        | 0.32        | 0.015(.204)         | 0.048(.192)        |
| <b>FrontoParietal-<br/>lhMiddleFrontal</b>     | <b>-38</b> | <b>49</b>  | <b>10</b> | <b>0</b>     | <b>0.033*</b> | <b>3.62</b> | <b>3.91</b> | <b>-0.026(.262)</b> | <b>0.047(.275)</b> |
| FrontoParietal-<br>lhInferiorTemporal          | -56        | -48        | -9        | 0.7          | 0.81          | 0.39        | -2.39       | 0.037(.242)         | 0.044(.232)        |
| FrontoParietal-<br>lhMedialSuperiorFro<br>ntal | -6         | 29         | 44        | 0.014        | 0.107         | 2.47        | 0.49        | -0.005(.168)        | 0.027(.176)        |

|                                                |     |     |     |       |       |       |       |              |             |
|------------------------------------------------|-----|-----|-----|-------|-------|-------|-------|--------------|-------------|
| FrontoParietal-<br>lhOrbitalMiddleFrontal      | -40 | 50  | -5  | 0.867 | 0.914 | 0.17  | -2.46 | 0.004(.346)  | 0.008(.336) |
| FrontoParietal-<br>lhAngular                   | -34 | -61 | 42  | 0.598 | 0.728 | 0.53  | -2.37 | 0.083(.213)  | 0.091(.225) |
| FrontoParietal-<br>lhOpercularInferiorFrontal  | -43 | 19  | 34  | 0.865 | 0.914 | -0.17 | -2.48 | 0.031(.249)  | 0.028(.255) |
| FrontoParietal-<br>lhTriangularInferiorFrontal | -40 | 24  | 23  | 0.913 | 0.938 | 0.11  | -2.5  | 0.005(.236)  | 0.007(.241) |
| FrontoParietal-<br>lhSuperiorFrontal           | -21 | 63  | 2   | 0.015 | 0.115 | 2.42  | 0.4   | -0.010(.320) | 0.046(.308) |
| FrontoParietal-<br>lhMiddleFrontal             | -29 | 51  | 10  | 0.117 | 0.275 | 1.57  | -1.3  | 0.019(.306)  | 0.051(.278) |
| FrontoParietal-<br>rhSupraMarginal             | 48  | -42 | 42  | 0.051 | 0.18  | 1.95  | -0.64 | 0.073(.196)  | 0.102(.204) |
| FrontoParietal-<br>rhMiddleFrontal             | 38  | 46  | 8   | 0.466 | 0.626 | 0.73  | -2.24 | 0.039(.271)  | 0.053(.261) |
| FrontoParietal-<br>rhInferiorTemporal          | 60  | -41 | -11 | 0.131 | 0.297 | 1.51  | -1.38 | 0.028(.252)  | 0.055(.244) |
| FrontoParietal-<br>rhSupplementaryMotor        | 7   | 26  | 47  | 0.082 | 0.23  | 1.74  | -1.03 | 0.047(.198)  | 0.070(.181) |
| FrontoParietal-<br>rhOrbitalInferiorFrontal    | 43  | 48  | -5  | 0.65  | 0.768 | -0.45 | -2.35 | 0.039(.308)  | 0.028(.310) |
| FrontoParietal-<br>rhInferiorParietal          | 42  | -54 | 44  | 0.213 | 0.4   | 1.24  | -1.74 | 0.067(.226)  | 0.088(.234) |
| FrontoParietal-<br>rhAngular                   | 36  | -57 | 45  | 0.779 | 0.856 | 0.28  | -2.46 | 0.095(.284)  | 0.100(.253) |
| FrontoParietal-<br>rhMiddleFrontal             | 38  | 29  | 36  | 0.108 | 0.259 | 1.61  | -1.23 | 0.016(.216)  | 0.041(.208) |
| FrontoParietal-<br>rhTriangularInferiorFrontal | 42  | 29  | 22  | 0.482 | 0.64  | 0.7   | -2.27 | 0.046(.257)  | 0.059(.247) |
| FrontoParietal-<br>rhTriangularInferiorFrontal | 39  | 19  | 26  | 0.307 | 0.475 | 1.02  | -2    | -0.006(.284) | 0.013(.259) |
| FrontoParietal-<br>rhOrbitalSuperiorFrontal    | 28  | 57  | -5  | 0.646 | 0.767 | -0.46 | -2.36 | 0.051(.365)  | 0.039(.352) |
| FrontoParietal-<br>rhSuperiorFrontal           | 24  | 59  | 5   | 0.083 | 0.23  | 1.73  | -1.02 | 0.007(.300)  | 0.043(.284) |
| FrontoParietal-<br>rhSuperiorFrontal           | 31  | 52  | 10  | 0.149 | 0.324 | 1.44  | -1.47 | 0.026(.298)  | 0.056(.284) |
| FrontoParietal-<br>rhMiddleFrontal             | 42  | 20  | 48  | 0.346 | 0.505 | 0.94  | -2.06 | 0.014(.172)  | 0.026(.178) |
| FrontoParietal-<br>rhMiddleFrontal             | 39  | 10  | 43  | 0.694 | 0.807 | 0.39  | -2.41 | 0.007(.211)  | 0.013(.218) |

|                                       |     |     |     |       |       |       |       |              |               |
|---------------------------------------|-----|-----|-----|-------|-------|-------|-------|--------------|---------------|
| None-<br>lhSuperiorPoleTemp<br>oral   | -29 | 5   | -27 | 0.841 | 0.899 | 0.2   | -2.47 | -0.023(.306) | -0.018(.269)  |
| None-<br>lhParaHippocampal            | -29 | -36 | -8  | 0.088 | 0.233 | 1.71  | -1.07 | -0.001(.197) | 0.022(.183)   |
| None-lhLingual                        | -18 | -39 | -1  | 0.04  | 0.166 | 2.06  | -0.43 | -0.012(.248) | 0.022(.231)   |
| None-<br>lhMiddlePoleTempor<br>al     | -34 | 17  | -32 | 0.781 | 0.856 | 0.28  | -2.44 | -0.032(.228) | -0.028(.212)  |
| None-<br>lhOrbitalSuperiorFro<br>ntal | -23 | 61  | -7  | 0.327 | 0.487 | 0.98  | -2    | 0.004(.486)  | 0.041(.496)   |
| None-lhAmygdala                       | -32 | 3   | -17 | 0.243 | 0.428 | 1.17  | -1.82 | -0.018(.357) | 0.013(.361)   |
| None-<br>lhOrbitalInferiorFront<br>al | -35 | 36  | -10 | 0.862 | 0.914 | 0.17  | -2.47 | -0.089(.320) | -0.085(.322)  |
| None-<br>lhOrbitalMiddleFront<br>al   | -22 | 32  | -14 | 0.877 | 0.916 | 0.15  | -2.47 | -0.006(.278) | -0.003(.262)  |
| None-<br>lhOrbitalSuperiorFro<br>ntal | -24 | 52  | -13 | 0.14  | 0.312 | 1.48  | -1.4  | 0.021(.426)  | 0.068(.411)   |
| None-<br>lhOrbitalSuperiorFro<br>ntal | -17 | 47  | -18 | 0.931 | 0.95  | -0.09 | -2.46 | 0.050(.525)  | 0.046(.503)   |
| None-<br>lhOrbitalSuperiorFro<br>ntal | -13 | 24  | -16 | 0.509 | 0.659 | -0.66 | -2.27 | 0.045(.478)  | 0.021(.490)   |
| None-lhRectus                         | -9  | 46  | -21 | 0.679 | 0.794 | 0.41  | -2.39 | 0.097(1.305) | -0.057(1.272) |
| None-lhRectus                         | -2  | 34  | -26 | 0.41  | 0.571 | 0.82  | -2.14 | 0.180(1.633) | -0.088(1.480) |
| None-<br>lhInferiorTemporal           | -53 | -13 | -29 | 0.287 | 0.457 | 1.06  | -1.91 | -0.065(.570) | -0.024(.499)  |
| None-<br>lhInferiorTemporal           | -45 | 9   | -37 | 0.142 | 0.313 | 1.47  | -1.42 | -0.071(.200) | -0.050(.196)  |
| None-<br>lhInferiorTemporal           | -55 | -40 | -16 | 0.589 | 0.722 | 0.54  | -2.33 | 0.047(.307)  | 0.060(.321)   |
| None-lhFusiform                       | -32 | -4  | -45 | 0.784 | 0.857 | 0.27  | -2.41 | -0.085(.465) | -0.077(.409)  |
| None-<br>lhInferiorTemporal           | -39 | -13 | -27 | 0.713 | 0.817 | -0.37 | -2.38 | -0.042(.278) | -0.050(.262)  |
| None-<br>lhParaHippocampal            | -20 | -13 | -24 | 0.539 | 0.682 | -0.61 | -2.31 | 0.012(.321)  | -0.001(.280)  |
| None-<br>lhParaHippocampal            | -22 | -22 | -17 | 0.283 | 0.455 | 1.07  | -1.94 | -0.033(.281) | -0.011(.279)  |
| None-<br>lhSuperiorPoleTemp<br>oral   | -51 | 7   | -20 | 0.324 | 0.487 | -0.99 | -2.02 | -0.041(.199) | -0.054(.183)  |
| None-<br>rhSuperiorPoleTemp<br>oral   | 32  | 14  | -30 | 0.826 | 0.898 | -0.22 | -2.45 | -0.003(.244) | -0.007(.235)  |

|                                   |     |     |     |       |       |       |       |              |               |
|-----------------------------------|-----|-----|-----|-------|-------|-------|-------|--------------|---------------|
| None-rhParaHippocampal            | 25  | -36 | -5  | 0.083 | 0.23  | 1.74  | -1.03 | 0.010(.224)  | 0.036(.205)   |
| None-rhParaHippocampal            | 19  | -30 | -10 | 0.244 | 0.428 | 1.16  | -1.82 | -0.047(.355) | -0.015(.364)  |
| None-rhRectus                     | 3   | 19  | -23 | 0.385 | 0.544 | -0.87 | -2.12 | 0.044(.730)  | -0.003(.725)  |
| None-rhOrbitalInferiorFrontal     | 35  | 37  | -8  | 0.149 | 0.324 | 1.44  | -1.47 | -0.093(.281) | -0.064(.270)  |
| None-rhOlfactory                  | 25  | 9   | -16 | 0.569 | 0.71  | -0.57 | -2.33 | 0.034(.322)  | 0.020(.335)   |
| None-rhOrbitalSuperiorFrontal     | 21  | 30  | -15 | 0.371 | 0.528 | 0.9   | -2.1  | -0.012(.287) | 0.007(.272)   |
| None-rhOrbitalSuperiorFrontal     | 22  | 51  | -14 | 0.103 | 0.255 | 1.63  | -1.17 | 0.017(.457)  | 0.069(.419)   |
| None-rhOrbitalSuperiorFrontal     | 12  | 26  | -25 | 0.702 | 0.81  | -0.38 | -2.42 | 0.084(1.254) | 0.050(1.206)  |
| None-rhRectus                     | 14  | 20  | -15 | 0.717 | 0.817 | -0.36 | -2.42 | 0.077(.411)  | 0.067(.378)   |
| None-rhRectus                     | 11  | 39  | -20 | 0.208 | 0.394 | -1.26 | -1.7  | 0.057(.814)  | -0.021(.820)  |
| None-lhRectus                     | 2   | 39  | -26 | 0.91  | 0.938 | 0.11  | -2.47 | 0.197(1.517) | -0.185(1.403) |
| None-rhInferiorTemporal           | 62  | -26 | -16 | 0.042 | 0.172 | 2.03  | -0.44 | 0.008(.402)  | 0.068(.385)   |
| None-rhInferiorTemporal           | 55  | -8  | -27 | 0.312 | 0.48  | 1.01  | -1.96 | -0.073(.419) | -0.043(.374)  |
| None-rhMiddlePoleTemporal         | 45  | 14  | -30 | 0.267 | 0.449 | 1.11  | -1.86 | -0.047(.185) | -0.033(.173)  |
| None-rhParaHippocampal            | 20  | -21 | -22 | 0.248 | 0.428 | 1.16  | -1.83 | -0.031(.308) | -0.005(.297)  |
| None-rhFusiform                   | 28  | 0   | -37 | 0.64  | 0.763 | -0.47 | -2.34 | 0.040(.523)  | 0.020(.533)   |
| None-rhInferiorTemporal           | 37  | 8   | -38 | 0.626 | 0.751 | 0.49  | -2.36 | -0.036(.290) | -0.026(.258)  |
| None-rhInferiorTemporal           | 54  | -10 | -37 | 0.834 | 0.899 | 0.21  | -2.43 | -0.031(.446) | -0.024(.440)  |
| None-rhInferiorTemporal           | 56  | -27 | -19 | 0.353 | 0.509 | 0.93  | -2.06 | 0.013(.709)  | 0.059(.659)   |
| None-rhFusiform                   | 31  | 2   | -46 | 0.683 | 0.797 | 0.41  | -2.38 | -0.013(.581) | 0.003(.497)   |
| None-rhFusiform                   | 40  | -12 | -30 | 0.9   | 0.932 | 0.13  | -2.47 | -0.009(.327) | -0.006(.291)  |
| None-rhFusiform                   | 32  | -9  | -36 | 0.225 | 0.41  | -1.21 | -1.74 | 0.040(.436)  | 0.004(.385)   |
| None-rhInferiorTemporal           | 43  | -24 | -21 | 0.471 | 0.629 | 0.72  | -2.18 | -0.027(.364) | -0.007(.357)  |
| None-rhParaHippocampal            | 20  | -11 | -25 | 0.777 | 0.856 | -0.28 | -2.43 | -0.011(.281) | -0.017(.271)  |
| None-rhParaHippocampal            | 30  | -19 | -19 | 0.774 | 0.856 | -0.29 | -2.46 | 0.000(.303)  | -0.006(.292)  |
| RetrosplenialTemporal-lhCalcarine | -14 | -58 | 18  | 0.052 | 0.18  | 1.94  | -0.65 | -0.102(.222) | -0.070(.227)  |
| RetrosplenialTemporal-lhLingual   | -9  | -50 | 4   | 0.352 | 0.509 | 0.93  | -2.07 | -0.078(.284) | -0.059(.261)  |

|                                     |            |            |           |              |               |             |             |                     |                     |
|-------------------------------------|------------|------------|-----------|--------------|---------------|-------------|-------------|---------------------|---------------------|
| RetrosplenialTemporal-lhFusiform    | -34        | -33        | -15       | 0.773        | 0.856         | -0.29       | -2.45       | -0.041(.188)        | -0.045(.187)        |
| RetrosplenialTemporal-lhFusiform    | -22        | -37        | -15       | 0.037        | 0.162         | 2.09        | -0.35       | -0.074(.217)        | -0.040(.216)        |
| RetrosplenialTemporal-rhCalcarine   | 14         | -54        | 11        | 0.152        | 0.327         | 1.43        | -1.5        | -0.093(.245)        | -0.069(.224)        |
| RetrosplenialTemporal-rhFusiform    | 35         | -36        | -12       | 0.423        | 0.58          | 0.8         | -2.19       | -0.065(.244)        | -0.051(.228)        |
| RetrosplenialTemporal-rhFusiform    | 35         | -24        | -20       | 0.533        | 0.681         | -0.62       | -2.31       | -0.012(.231)        | -0.022(.218)        |
| RetrosplenialTemporal-rhFusiform    | 24         | -36        | -13       | 0.879        | 0.916         | -0.15       | -2.49       | -0.046(.231)        | -0.049(.227)        |
| Saliencel-hAnteriorCingulum         | -10        | 34         | 22        | 0.011        | 0.1           | 2.54        | 0.67        | 0.030(.220)         | 0.072(.222)         |
| Saliencel-hInsula                   | -32        | 17         | -8        | 0.048        | 0.18          | 1.98        | -0.58       | 0.067(.284)         | 0.106(.264)         |
| <b>Saliencel-rhAnteriorCingulum</b> | <b>8</b>   | <b>35</b>  | <b>23</b> | <b>0.003</b> | <b>0.06</b>   | <b>2.99</b> | <b>1.88</b> | <b>0.030(.247)</b>  | <b>0.082(.232)</b>  |
| Saliencel-rhInsula                  | 31         | 23         | -5        | 0.051        | 0.18          | 1.95        | -0.63       | 0.100(.302)         | 0.139(.269)         |
| <b>SMhand-lhSuperiorParietal</b>    | <b>-19</b> | <b>-49</b> | <b>65</b> | <b>0.001</b> | <b>0.034*</b> | <b>3.45</b> | <b>3.31</b> | <b>-0.054(.176)</b> | <b>-0.012(.167)</b> |
| SMhand-lhPrecuneus                  | -11        | -48        | 60        | 0.229        | 0.411         | 1.2         | -1.78       | -0.024(.237)        | -0.005(.213)        |
| SMhand-lhLobuleParacentral          | -16        | -33        | 66        | 0.061        | 0.189         | 1.88        | -0.78       | -0.007(.289)        | 0.028(.257)         |
| SMhand-lhLobuleParacentral          | -11        | -29        | 70        | 0.026        | 0.145         | 2.23        | -0.05       | -0.009(.178)        | 0.020(.172)         |
| SMhand-lhLobuleParacentral          | -7         | -20        | 74        | 0.468        | 0.626         | 0.73        | -2.21       | -0.012(.235)        | 0.000(.211)         |
| <b>SMhand-lhPrecuneus</b>           | <b>-11</b> | <b>-41</b> | <b>65</b> | <b>0</b>     | <b>0.033*</b> | <b>3.75</b> | <b>4.4</b>  | <b>-0.064(.208)</b> | <b>-0.012(.183)</b> |
| SMhand-lhLobuleParacentral          | -5         | -28        | 60        | 0.007        | 0.086         | 2.68        | 1.01        | -0.040(.184)        | -0.005(.179)        |
| SMhand-lhMiddleCingulum             | -5         | -16        | 49        | 0.13         | 0.297         | 1.51        | -1.37       | 0.002(.220)         | 0.025(.200)         |
| SMhand-lhPostcentral                | -36        | -30        | 54        | 0.502        | 0.659         | 0.67        | -2.28       | 0.051(.278)         | 0.065(.268)         |
| SMhand-lhPrecentral                 | -37        | -23        | 62        | 0.364        | 0.521         | 0.91        | -2.1        | 0.042(.175)         | 0.054(.181)         |
| <b>SMhand-lhPrecentral</b>          | <b>-20</b> | <b>-25</b> | <b>64</b> | <b>0.003</b> | <b>0.06</b>   | <b>2.97</b> | <b>1.82</b> | <b>-0.021(.201)</b> | <b>0.019(.180)</b>  |
| SMhand-lhPrecentral                 | -23        | -14        | 64        | 0.063        | 0.189         | 1.86        | -0.81       | 0.020(.173)         | 0.043(.161)         |
| SMhand-lhLobuleParacentral          | -17        | -9         | 68        | 0.007        | 0.086         | 2.69        | 1.05        | 0.005(.155)         | 0.034(.144)         |
| SMhand-lhSuperiorParietal           | -29        | -45        | 62        | 0.026        | 0.145         | 2.23        | -0.05       | -0.030(.193)        | -0.000(.179)        |
| SMhand-lhInferiorParietal           | -54        | -21        | 41        | 0.012        | 0.102         | 2.53        | 0.62        | -0.023(.213)        | 0.015(.206)         |
| SMhand-lhPostcentral                | -35        | -35        | 42        | 0.385        | 0.544         | 0.87        | -2.14       | 0.005(.200)         | 0.017(.199)         |
| SMhand-lhPostcentral                | -28        | -37        | 61        | 0.032        | 0.155         | 2.15        | -0.24       | -0.025(.189)        | 0.001(.165)         |
| SMhand-lhPostcentral                | -47        | -31        | 55        | 0.169        | 0.348         | 1.38        | -1.56       | 0.018(.195)         | 0.039(.207)         |

|                                    |            |            |           |              |               |             |             |                     |                     |
|------------------------------------|------------|------------|-----------|--------------|---------------|-------------|-------------|---------------------|---------------------|
| SMhand-rhSuperiorParietal          | 21         | -48        | 66        | 0.011        | 0.099         | 2.55        | 0.69        | -0.051(.182)        | -0.020(.167)        |
| SMhand-rhPostcentral               | 16         | -33        | 68        | 0.046        | 0.18          | 1.99        | -0.55       | -0.028(.272)        | 0.010(.255)         |
| SMhand-rhLobuleParacentral         | 5          | -27        | 65        | 0.28         | 0.452         | 1.08        | -1.91       | -0.029(.196)        | -0.014(.179)        |
| SMhand-rhPostcentral               | 12         | -41        | 67        | 0.028        | 0.149         | 2.19        | -0.13       | -0.042(.188)        | -0.012(.181)        |
| <b>SMhand-rhSupplementaryMotor</b> | <b>5</b>   | <b>-17</b> | <b>52</b> | <b>0.003</b> | <b>0.06</b>   | <b>2.94</b> | <b>1.74</b> | <b>-0.054(.230)</b> | <b>-0.007(.215)</b> |
| SMhand-rhMiddleCingulum            | 7          | -8         | 51        | 0.173        | 0.351         | 1.36        | -1.59       | 0.007(.193)         | 0.026(.198)         |
| SMhand-rhPrecentral                | 38         | -22        | 60        | 0.063        | 0.189         | 1.86        | -0.79       | -0.009(.154)        | 0.013(.157)         |
| <b>SMhand-rhPrecentral</b>         | <b>20</b>  | <b>-25</b> | <b>65</b> | <b>0.003</b> | <b>0.06</b>   | <b>2.93</b> | <b>1.69</b> | <b>-0.030(.195)</b> | <b>0.009(.177)</b>  |
| SMhand-rhPrecentral                | 12         | -28        | 70        | 0.269        | 0.449         | 1.11        | -1.89       | -0.000(.194)        | 0.015(.183)         |
| SMhand-rhPrecentral                | 29         | -14        | 64        | 0.138        | 0.31          | 1.48        | -1.44       | 0.004(.190)         | 0.024(.182)         |
| SMhand-rhPrecentral                | 17         | -17        | 71        | 0.505        | 0.659         | 0.67        | -2.27       | 0.019(.183)         | 0.028(.173)         |
| SMhand-rhSuperiorFrontal           | 21         | -6         | 65        | 0.242        | 0.428         | 1.17        | -1.82       | 0.011(.143)         | 0.024(.149)         |
| SMhand-rhPostcentral               | 30         | -42        | 60        | 0.205        | 0.394         | 1.27        | -1.71       | -0.042(.203)        | -0.024(.194)        |
| SMhand-rhInferiorParietal          | 34         | -41        | 52        | 0.179        | 0.357         | 1.35        | -1.61       | -0.037(.234)        | -0.014(.223)        |
| SMhand-rhSupraMarginal             | 40         | -32        | 40        | 0.024        | 0.143         | 2.26        | 0           | -0.023(.197)        | 0.008(.187)         |
| SMhand-rhPostcentral               | 28         | -35        | 63        | 0.06         | 0.189         | 1.88        | -0.75       | -0.041(.167)        | -0.018(.161)        |
| <b>SMhand-rhPostcentral</b>        | <b>39</b>  | <b>-35</b> | <b>58</b> | <b>0.001</b> | <b>0.045*</b> | <b>3.26</b> | <b>2.71</b> | <b>-0.053(.182)</b> | <b>-0.006(.192)</b> |
| <b>SMhand-rhPostcentral</b>        | <b>37</b>  | <b>-26</b> | <b>51</b> | <b>0.006</b> | <b>0.078</b>  | <b>2.78</b> | <b>1.29</b> | <b>-0.042(.214)</b> | <b>0.005(.226)</b>  |
| SMhand-rhPostcentral               | 49         | -26        | 52        | 0.202        | 0.391         | 1.28        | -1.69       | -0.022(.211)        | -0.003(.198)        |
| SMhand-rhSupraMarginal             | 53         | -23        | 39        | 0.027        | 0.145         | 2.22        | -0.09       | -0.029(.193)        | 0.003(.193)         |
| <b>SMmouth-lhPostcentral</b>       | <b>-52</b> | <b>-8</b>  | <b>38</b> | <b>0.001</b> | <b>0.045*</b> | <b>3.26</b> | <b>2.68</b> | <b>-0.035(.189)</b> | <b>0.010(.190)</b>  |
| <b>SMmouth-lhPostcentral</b>       | <b>-42</b> | <b>-12</b> | <b>50</b> | <b>0.003</b> | <b>0.06</b>   | <b>2.97</b> | <b>1.82</b> | <b>0.009(.202)</b>  | <b>0.050(.184)</b>  |
| SMmouth-lhPostcentral              | -52        | -12        | 30        | 0.317        | 0.483         | 1           | -2.03       | -0.034(.287)        | -0.014(.286)        |
| SMmouth-lhPostcentral              | -46        | -18        | 53        | 0.347        | 0.505         | 0.94        | -2.07       | 0.046(.287)         | 0.065(.275)         |
| SMmouth-rhPostcentral              | 50         | -7         | 36        | 0.056        | 0.184         | 1.91        | -0.73       | -0.017(.205)        | 0.012(.207)         |
| <b>SMmouth-rhPrecentral</b>        | <b>42</b>  | <b>-11</b> | <b>47</b> | <b>0.001</b> | <b>0.034*</b> | <b>3.41</b> | <b>3.17</b> | <b>-0.001(.184)</b> | <b>0.042(.175)</b>  |
| SMmouth-rhPostcentral              | 54         | -8         | 26        | 0.157        | 0.332         | 1.42        | -1.53       | -0.050(.283)        | -0.021(.281)        |

|                                         |           |           |           |              |              |             |             |                    |                    |
|-----------------------------------------|-----------|-----------|-----------|--------------|--------------|-------------|-------------|--------------------|--------------------|
| SMmouth-rhPrecentral                    | 48        | -15       | 49        | 0.395        | 0.554        | 0.85        | -2.14       | 0.000(.265)        | 0.017(.258)        |
| Subcortical-lhCerebellum                | NA        | NA        | NA        | 0.107        | 0.258        | 1.61        | -1.23       | 0.029(.286)        | 0.060(.257)        |
| Subcortical-lhThalamus                  | NA        | NA        | NA        | 0.1          | 0.255        | 1.65        | -1.18       | 0.027(.143)        | 0.044(.148)        |
| Subcortical-lhCaudate                   | NA        | NA        | NA        | 0.071        | 0.207        | 1.8         | -0.91       | 0.076(.226)        | 0.105(.217)        |
| <b>Subcortical-lhPutamen</b>            | <b>NA</b> | <b>NA</b> | <b>NA</b> | <b>0.002</b> | <b>0.051</b> | <b>3.12</b> | <b>2.25</b> | <b>0.037(.181)</b> | <b>0.077(.179)</b> |
| Subcortical-lhPallidum                  | NA        | NA        | NA        | 0.167        | 0.347        | 1.38        | -1.56       | 0.044(.163)        | 0.060(.152)        |
| Subcortical-brainStem                   | NA        | NA        | NA        | 0.3          | 0.469        | 1.04        | -1.96       | 0.026(.177)        | 0.040(.177)        |
| Subcortical-lhHippocampus               | NA        | NA        | NA        | 0.441        | 0.597        | 0.77        | -2.21       | -0.011(.151)       | -0.002(.147)       |
| Subcortical-lhAmygdala                  | NA        | NA        | NA        | 0.325        | 0.487        | -0.98       | -2.03       | -0.014(.199)       | -0.027(.179)       |
| Subcortical-lhAccumbens                 | NA        | NA        | NA        | 0.977        | 0.984        | 0.03        | -2.49       | 0.111(.256)        | 0.112(.235)        |
| Subcortical-lhVentraldc                 | NA        | NA        | NA        | 0.027        | 0.145        | 2.21        | -0.1        | 0.038(.192)        | 0.068(.189)        |
| Subcortical-rhCerebellum                | NA        | NA        | NA        | 0.279        | 0.452        | 1.08        | -1.91       | 0.030(.276)        | 0.050(.249)        |
| Subcortical-rhThalamus                  | NA        | NA        | NA        | 0.055        | 0.184        | 1.92        | -0.71       | 0.037(.166)        | 0.059(.159)        |
| Subcortical-rhCaudate                   | NA        | NA        | NA        | 0.161        | 0.34         | 1.4         | -1.53       | 0.098(.231)        | 0.121(.229)        |
| Subcortical-rhPutamen                   | NA        | NA        | NA        | 0.015        | 0.114        | 2.44        | 0.4         | 0.049(.190)        | 0.083(.187)        |
| Subcortical-rhPallidum                  | NA        | NA        | NA        | 0.189        | 0.374        | 1.31        | -1.65       | 0.045(.173)        | 0.059(.152)        |
| Subcortical-rhHippocampus               | NA        | NA        | NA        | 0.44         | 0.597        | 0.77        | -2.22       | -0.005(.163)       | 0.003(.151)        |
| Subcortical-rhAmygdala                  | NA        | NA        | NA        | 0.135        | 0.304        | 1.5         | -1.39       | -0.038(.211)       | -0.016(.192)       |
| Subcortical-rhAccumbens                 | NA        | NA        | NA        | 0.937        | 0.952        | -0.08       | -2.5        | 0.100(.253)        | 0.098(.226)        |
| Subcortical-rhVentraldc                 | NA        | NA        | NA        | 0.027        | 0.145        | 2.22        | -0.1        | 0.039(.193)        | 0.070(.189)        |
| VentralAttn-lhSupplementaryMotor        | -4        | 12        | 65        | 0.341        | 0.5          | 0.95        | -2.05       | 0.002(.169)        | 0.014(.161)        |
| VentralAttn-lhMiddleTemporal            | -45       | -54       | 15        | 0.05         | 0.18         | 1.96        | -0.63       | -0.049(.215)       | -0.018(.222)       |
| VentralAttn-lhMiddleTemporal            | -52       | -56       | 11        | 0.545        | 0.683        | 0.6         | -2.32       | -0.037(.219)       | -0.028(.223)       |
| VentralAttn-lhMiddleTemporal            | -48       | -40       | 2         | 0.925        | 0.947        | 0.09        | -2.51       | -0.051(.178)       | -0.050(.181)       |
| VentralAttn-lhTriangularInferiorFrontal | -50       | 21        | 11        | 0.669        | 0.784        | 0.43        | -2.4        | -0.072(.250)       | -0.065(.228)       |

|                                             |            |            |          |              |              |             |             |                     |                     |
|---------------------------------------------|------------|------------|----------|--------------|--------------|-------------|-------------|---------------------|---------------------|
| VentralAttn-<br>lhOrbitalInferiorFrontal    | -47        | 39         | -9       | 0.613        | 0.739        | -0.51       | -2.37       | -0.090(.333)        | -0.102(.326)        |
| VentralAttn-lhInsula                        | -29        | 20         | -14      | 0.103        | 0.255        | 1.63        | -1.2        | -0.037(.218)        | -0.013(.199)        |
| VentralAttn-<br>lhOrbitalInferiorFrontal    | -44        | 33         | -7       | 0.717        | 0.817        | 0.36        | -2.42       | -0.096(.262)        | -0.088(.266)        |
| VentralAttn-<br>lhTriangularInferiorFrontal | -45        | 29         | 1        | 0.816        | 0.889        | -0.23       | -2.46       | -0.098(.280)        | -0.103(.274)        |
| VentralAttn-<br>lhPrecentral                | -39        | 5          | 48       | 0.33         | 0.488        | 0.97        | -2.03       | -0.017(.210)        | -0.003(.199)        |
| VentralAttn-<br>lhMiddleTemporal            | -59        | -18        | -3       | 0.743        | 0.839        | -0.33       | -2.44       | -0.037(.249)        | -0.042(.224)        |
| VentralAttn-<br>rhMiddleTemporal            | 58         | -45        | 9        | 0.029        | 0.151        | 2.18        | -0.17       | -0.051(.216)        | -0.018(.208)        |
| VentralAttn-<br>rhMiddleTemporal            | 61         | -39        | 2        | 0.328        | 0.487        | 0.98        | -2.03       | -0.056(.212)        | -0.040(.212)        |
| VentralAttn-<br>rhSuperiorTemporal          | 57         | -17        | -3       | 0.039        | 0.164        | 2.07        | -0.39       | -0.039(.204)        | -0.007(.212)        |
| VentralAttn-<br>rhSuperiorTemporal          | 47         | -40        | 13       | 0.008        | 0.086        | 2.67        | 0.99        | -0.037(.213)        | 0.004(.210)         |
| VentralAttn-<br>rhMiddleTemporal            | 46         | -37        | 3        | 0.056        | 0.184        | 1.91        | -0.73       | -0.047(.212)        | -0.018(.206)        |
| VentralAttn-<br>rhSuperiorTemporal          | 48         | -26        | 0        | 0.114        | 0.271        | 1.58        | -1.27       | -0.032(.180)        | -0.010(.188)        |
| VentralAttn-<br>rhTriangularInferiorFrontal | 52         | 24         | 10       | 0.248        | 0.428        | 1.16        | -1.84       | -0.054(.265)        | -0.033(.245)        |
| VentralAttn-<br>rhOrbitalInferiorFrontal    | 48         | 38         | -9       | 0.339        | 0.5          | 0.96        | -2.03       | -0.100(.317)        | -0.077(.322)        |
| VentralAttn-<br>rhOrbitalInferiorFrontal    | 45         | 31         | -6       | 0.428        | 0.584        | 0.79        | -2.18       | -0.051(.231)        | -0.038(.223)        |
| VentralAttn-rhInsula                        | 27         | 20         | -15      | 0.009        | 0.092        | 2.61        | 0.84        | -0.005(.223)        | 0.035(.206)         |
| VentralAttn-<br>rhSuperiorTemporal          | 57         | -6         | -8       | 0.775        | 0.856        | -0.29       | -2.46       | -0.027(.217)        | -0.031(.212)        |
| VentralAttn-<br>rhMiddleTemporal            | 47         | -22        | -8       | 0.067        | 0.197        | 1.83        | -0.86       | -0.052(.273)        | -0.017(.258)        |
| Visual-<br>lhSuperiorOccipital              | -18        | -86        | 22       | 0.049        | 0.18         | 1.97        | -0.62       | -0.056(.242)        | -0.024(.220)        |
| Visual-lhLingual                            | -17        | -60        | -5       | 0.296        | 0.467        | 1.05        | -1.97       | -0.012(.248)        | 0.006(.240)         |
| Visual-lhCalcarine                          | -11        | -83        | 4        | 0.285        | 0.455        | 1.07        | -1.94       | 0.017(.351)         | 0.044(.339)         |
| <b>Visual-lhLingual</b>                     | <b>-22</b> | <b>-58</b> | <b>2</b> | <b>0.005</b> | <b>0.078</b> | <b>2.78</b> | <b>1.28</b> | <b>-0.079(.363)</b> | <b>-0.005(.360)</b> |
| Visual-lhLingual                            | -10        | -58        | 3        | 0.579        | 0.718        | 0.55        | -2.34       | -0.107(.516)        | -0.086(.519)        |
| Visual-lhLingual                            | -17        | -46        | -4       | 0.992        | 0.992        | -0.01       | -2.51       | -0.014(.325)        | -0.014(.313)        |
| Visual-<br>lhSuperiorOccipital              | -14        | -77        | 27       | 0.01         | 0.092        | 2.6         | 0.79        | -0.042(.216)        | -0.001(.214)        |
| Visual-<br>lhMiddleOccipital                | -31        | -84        | 9        | 0.104        | 0.255        | 1.63        | -1.2        | -0.084(.250)        | -0.054(.248)        |

|                                |           |            |          |          |               |             |             |                     |                    |
|--------------------------------|-----------|------------|----------|----------|---------------|-------------|-------------|---------------------|--------------------|
| Visual-lhMiddleOccipital       | -34       | -87        | 0        | 0.39     | 0.549         | 0.86        | -2.13       | -0.053(.285)        | -0.035(.276)       |
| Visual-lhMiddleOccipital       | -43       | -68        | 10       | 0.084    | 0.23          | 1.73        | -1.04       | -0.026(.212)        | -0.001(.193)       |
| Visual-lhFusiform              | -29       | -59        | -9       | 0.272    | 0.45          | 1.1         | -1.91       | -0.017(.240)        | 0.002(.234)        |
| Visual-lhFusiform              | -34       | -64        | -16      | 0.593    | 0.724         | 0.54        | -2.36       | 0.028(.331)         | 0.039(.293)        |
| Visual-lhFusiform              | -34       | -44        | -22      | 0.228    | 0.411         | -1.21       | -1.77       | 0.005(.256)         | -0.017(.244)       |
| Visual-lhCuneus                | -5        | -88        | 19       | 0.031    | 0.155         | 2.16        | -0.22       | -0.009(.251)        | 0.030(.242)        |
| Visual-lhLingual               | -9        | -78        | -4       | 0.168    | 0.347         | 1.38        | -1.56       | 0.029(.323)         | 0.062(.321)        |
| Visual-lhInferiorOccipital     | -41       | -72        | -6       | 0.415    | 0.576         | 0.81        | -2.17       | -0.041(.241)        | -0.027(.229)       |
| Visual-lhInferiorOccipital     | -25       | -97        | -8       | 0.898    | 0.932         | 0.13        | -2.48       | -0.032(.485)        | -0.028(.438)       |
| Visual-lhLingual               | -23       | -82        | -12      | 0.527    | 0.677         | 0.63        | -2.31       | 0.064(.321)         | 0.078(.309)        |
| Visual-rhSuperiorOccipital     | 22        | -85        | 24       | 0.127    | 0.294         | 1.53        | -1.35       | -0.054(.228)        | -0.028(.230)       |
| Visual-rhFusiform              | 22        | -46        | -10      | 0.587    | 0.722         | 0.54        | -2.35       | -0.015(.249)        | -0.006(.241)       |
| Visual-rhCalcarine             | 16        | -74        | 9        | 0.061    | 0.189         | 1.87        | -0.79       | -0.002(.351)        | 0.044(.338)        |
| Visual-rhLingual               | 20        | -45        | -4       | 0.165    | 0.345         | 1.39        | -1.55       | -0.042(.330)        | -0.011(.307)       |
| Visual-rhLingual               | 16        | -60        | -5       | 0.053    | 0.18          | 1.94        | -0.67       | -0.023(.267)        | 0.015(.270)        |
| Visual-rhInferiorParietal      | 27        | -55        | 54       | 0.193    | 0.379         | 1.3         | -1.66       | -0.003(.198)        | 0.017(.200)        |
| Visual-rhCuneus                | 18        | -78        | 34       | 0.014    | 0.107         | 2.47        | 0.48        | -0.035(.239)        | 0.006(.221)        |
| Visual-rhCuneus                | 8         | -86        | 32       | 0.087    | 0.233         | 1.71        | -1.06       | -0.018(.259)        | 0.016(.270)        |
| Visual-rhMiddleOccipital       | 35        | -77        | 21       | 0.54     | 0.682         | 0.61        | -2.32       | -0.024(.246)        | -0.014(.217)       |
| Visual-rhMiddleOccipital       | 32        | -86        | 2        | 0.505    | 0.659         | 0.67        | -2.28       | 0.057(.277)         | 0.071(.269)        |
| Visual-rhMiddleTemporal        | 44        | -67        | 2        | 0.263    | 0.445         | 1.12        | -1.88       | -0.002(.188)        | 0.013(.188)        |
| Visual-rhInferiorTemporal      | 47        | -52        | -12      | 0.209    | 0.394         | 1.26        | -1.73       | 0.014(.196)         | 0.031(.191)        |
| <b>Visual-rhMiddleTemporal</b> | <b>49</b> | <b>-54</b> | <b>9</b> | <b>0</b> | <b>0.033*</b> | <b>3.65</b> | <b>4.01</b> | <b>-0.051(.210)</b> | <b>0.001(.193)</b> |
| Visual-rhFusiform              | 31        | -46        | -6       | 0.101    | 0.255         | 1.64        | -1.18       | -0.056(.271)        | -0.024(.267)       |
| Visual-rhFusiform              | 27        | -69        | -7       | 0.141    | 0.313         | 1.47        | -1.44       | 0.047(.240)         | 0.075(.255)        |
| Visual-rhFusiform              | 35        | -44        | -20      | 0.939    | 0.952         | 0.08        | -2.49       | 0.052(.265)         | 0.053(.249)        |
| Visual-rhCuneus                | 14        | -92        | 15       | 0.419    | 0.579         | 0.81        | -2.18       | -0.044(.271)        | -0.028(.273)       |
| Visual-rhLingual               | 10        | -74        | -2       | 0.056    | 0.184         | 1.91        | -0.72       | 0.010(.308)         | 0.051(.297)        |
| Visual-rhLingual               | 20        | -87        | -7       | 0.84     | 0.899         | 0.2         | -2.49       | 0.149(.401)         | 0.154(.395)        |
| Visual-rhCuneus                | 5         | -80        | 23       | 0.009    | 0.092         | 2.62        | 0.86        | -0.020(.266)        | 0.033(.277)        |
| Visual-rhCuneus                | 15        | -70        | 23       | 0.013    | 0.107         | 2.48        | 0.51        | -0.046(.260)        | 0.000(.255)        |

Note that x, y and z values here refer to the Montreal Neurological Institute (MNI) coordinates at the centroid of each cortical-surface region-of-interest (ROI) of a standard MNI brain. The label for each cortical-surface ROI is based on the Automated Anatomical Labeling (AAL) algorithm<sup>2</sup> via the mni2aal R package (<https://github.com/yunshuan/label4MRI>). The label for each subcortical-volumetric ROI is based on Freesurfer' segmentation algorithm<sup>3</sup>, applied on each participant's individual brain space. Given that individual brain space was used for subcortical ROIs, their x, y and z coordinates are not given here. \* = qFDR < .05. Bold = qFDR < .05 or ln(BF<sub>10</sub>) > 1.1. The value of ln(BF<sub>10</sub>) > 1.1 and < -1.2 are interpreted as substantial evidence for the alternative (of there being a difference), and null hypotheses (of there being no difference), respectively.

**eTable 7.** Group differences between children with vs. without low mood during reward anticipation [Large Reward > Neutral Cue] in the MID task-fMRI activation

| Name: Network-ROI                   | x          | y          | z         | p            | q <sub>FDR</sub> | t           | ln(BF <sub>10</sub> ) | With Low Mood M(SD) | Without Low Mood M(SD) |
|-------------------------------------|------------|------------|-----------|--------------|------------------|-------------|-----------------------|---------------------|------------------------|
| Auditory-lhHeschl                   | -32        | -29        | 16        | 0.209        | 0.635            | 1.26        | -1.79                 | -0.024(.245)        | -0.004(.238)           |
| Auditory-lhSupraMarginal            | -46        | -41        | 26        | 0.462        | 0.77             | 0.74        | -2.28                 | -0.024(.264)        | -0.010(.258)           |
| <b>Auditory-lhOpercularRolandic</b> | <b>-36</b> | <b>-34</b> | <b>20</b> | <b>0.002</b> | <b>0.386</b>     | <b>3.07</b> | <b>2.05</b>           | <b>-0.060(.278)</b> | <b>-0.001(.275)</b>    |
| Auditory-lhSuperiorTemporal         | -53        | -21        | 5         | 0.778        | 0.945            | 0.28        | -2.51                 | 0.015(.221)         | 0.019(.203)            |
| Auditory-lhSuperiorTemporal         | -60        | -38        | 16        | 0.368        | 0.75             | 0.9         | -2.16                 | -0.016(.212)        | -0.004(.199)           |
| Auditory-lhSuperiorTemporal         | -59        | -30        | 11        | 0.447        | 0.75             | 0.76        | -2.26                 | -0.007(.196)        | 0.003(.201)            |
| Auditory-lhSuperiorTemporal         | -41        | -38        | 14        | 0.119        | 0.56             | 1.56        | -1.36                 | -0.024(.237)        | 0.002(.240)            |
| Auditory-lhInsula                   | -34        | -22        | 10        | 0.075        | 0.552            | 1.78        | -1                    | -0.032(.233)        | -0.005(.212)           |
| Auditory-lhInsula                   | -37        | -14        | 19        | 0.264        | 0.673            | 1.12        | -1.94                 | -0.045(.243)        | -0.026(.240)           |
| Auditory-lhOpercularRolandic        | -52        | -14        | 15        | 0.955        | 0.989            | -0.06       | -2.56                 | -0.025(.283)        | -0.026(.282)           |
| Auditory-lhSupraMarginal            | -51        | -22        | 19        | 0.366        | 0.75             | 0.9         | -2.16                 | -0.027(.244)        | -0.013(.221)           |
| Auditory-lhSuperiorTemporal         | -54        | -1         | -1        | 0.973        | 0.989            | -0.03       | -2.55                 | -0.008(.170)        | -0.009(.172)           |
| Auditory-rhInsula                   | 34         | -22        | 13        | 0.007        | 0.431            | 2.71        | 1.05                  | -0.052(.229)        | -0.012(.215)           |
| Auditory-rhOpercularRolandic        | 36         | -31        | 19        | 0.029        | 0.482            | 2.19        | -0.2                  | -0.049(.247)        | -0.014(.234)           |
| Auditory-rhSuperiorTemporal         | 54         | -16        | 5         | 0.156        | 0.598            | 1.42        | -1.57                 | -0.012(.217)        | 0.008(.210)            |
| Auditory-rhSuperiorTemporal         | 59         | -39        | 15        | 0.954        | 0.989            | 0.06        | -2.55                 | 0.000(.221)         | 0.001(.184)            |
| Auditory-rhSuperiorTemporal         | 62         | -24        | 1         | 0.143        | 0.584            | 1.47        | -1.49                 | -0.025(.219)        | -0.004(.207)           |
| Auditory-rhSuperiorTemporal         | 60         | -25        | 10        | 0.042        | 0.552            | 2.03        | -0.51                 | -0.036(.212)        | -0.009(.192)           |
| Auditory-rhInsula                   | 38         | -12        | 20        | 0.376        | 0.75             | 0.89        | -2.17                 | -0.060(.271)        | -0.043(.267)           |
| Auditory-rhInsula                   | 37         | -10        | 12        | 0.532        | 0.81             | 0.62        | -2.37                 | -0.024(.249)        | -0.013(.247)           |
| Auditory-rhOpercularRolandic        | 61         | -2         | 11        | 0.645        | 0.88             | 0.46        | -2.46                 | -0.022(.293)        | -0.013(.264)           |
| Auditory-rhOpercularRolandic        | 54         | -14        | 17        | 0.971        | 0.989            | 0.04        | -2.56                 | -0.036(.257)        | -0.036(.245)           |
| Auditory-rhSuperiorTemporal         | 40         | -22        | 3         | 0.352        | 0.75             | 0.93        | -2.12                 | -0.047(.380)        | -0.022(.379)           |
| Auditory-rhSuperiorTemporal         | 56         | 2          | -2        | 0.546        | 0.815            | 0.6         | -2.36                 | -0.010(.169)        | -0.004(.160)           |
| CinguloOperc-lhMiddleCingulum       | -17        | -36        | 43        | 0.422        | 0.75             | 0.8         | -2.25                 | -0.018(.188)        | -0.008(.176)           |
| CinguloOperc-lhMiddleCingulum       | -9         | 0          | 43        | 0.32         | 0.717            | 0.99        | -2.07                 | 0.031(.193)         | 0.043(.169)            |

|                                         |     |     |     |       |       |       |       |              |              |
|-----------------------------------------|-----|-----|-----|-------|-------|-------|-------|--------------|--------------|
| CinguloOperc-lhMiddleCingulum           | -8  | 15  | 34  | 0.092 | 0.552 | 1.69  | -1.17 | 0.020(.212)  | 0.042(.191)  |
| CinguloOperc-lhAnteriorCingulum         | -9  | 25  | 28  | 0.225 | 0.649 | 1.21  | -1.84 | 0.034(.264)  | 0.055(.244)  |
| CinguloOperc-lhSupplementaryMotor       | -8  | -9  | 63  | 0.394 | 0.75  | 0.85  | -2.2  | 0.042(.185)  | 0.051(.160)  |
| CinguloOperc-lhPrecentral               | -42 | -4  | 47  | 0.101 | 0.56  | 1.64  | -1.23 | 0.017(.213)  | 0.041(.208)  |
| CinguloOperc-lhSupraMarginal            | -58 | -41 | 36  | 0.095 | 0.552 | 1.67  | -1.19 | -0.031(.196) | -0.009(.193) |
| CinguloOperc-lhSuperiorTemporal         | -39 | -16 | -5  | 0.896 | 0.98  | 0.13  | -2.56 | -0.023(.197) | -0.021(.190) |
| CinguloOperc-lhInsula                   | -39 | -2  | -12 | 0.142 | 0.584 | 1.47  | -1.5  | -0.027(.207) | -0.008(.182) |
| CinguloOperc-lhInsula                   | -38 | 3   | 12  | 0.407 | 0.75  | 0.83  | -2.22 | 0.017(.184)  | 0.027(.184)  |
| CinguloOperc-lhInsula                   | -37 | 1   | 6   | 0.716 | 0.933 | -0.36 | -2.5  | 0.015(.203)  | 0.010(.196)  |
| CinguloOperc-lhInsula                   | -37 | 9   | -1  | 0.052 | 0.552 | 1.95  | -0.7  | 0.004(.212)  | 0.032(.203)  |
| CinguloOperc-lhInsula                   | -29 | 24  | 8   | 0.519 | 0.81  | 0.65  | -2.34 | 0.078(.218)  | 0.087(.198)  |
| CinguloOperc-lhOpercularRolandic        | -60 | -4  | 9   | 0.406 | 0.75  | 0.83  | -2.21 | -0.039(.292) | -0.023(.271) |
| CinguloOperc-lhSuperiorTemporal         | -55 | -32 | 23  | 0.904 | 0.98  | 0.12  | -2.54 | -0.037(.222) | -0.035(.220) |
| CinguloOperc-lhSupraMarginal            | -59 | -24 | 31  | 0.128 | 0.563 | 1.52  | -1.43 | -0.030(.200) | -0.010(.191) |
| CinguloOperc-lhOpercularRolandic        | -52 | -1  | 5   | 0.538 | 0.81  | 0.62  | -2.37 | 0.010(.223)  | 0.019(.215)  |
| CinguloOperc-lhOpercularInferiorFrontal | -49 | 8   | 11  | 0.046 | 0.552 | 2     | -0.61 | -0.029(.211) | -0.002(.195) |
| CinguloOperc-lhMiddleFrontal            | -27 | 47  | 21  | 0.92  | 0.983 | 0.1   | -2.53 | 0.009(.250)  | 0.011(.239)  |
| CinguloOperc-lhMiddleFrontal            | -29 | 38  | 28  | 0.9   | 0.98  | 0.13  | -2.55 | 0.003(.218)  | 0.004(.209)  |
| CinguloOperc-rhMiddleCingulum           | 16  | -33 | 43  | 0.062 | 0.552 | 1.87  | -0.84 | -0.024(.193) | -0.002(.171) |
| CinguloOperc-rhSupplementaryMotor       | 7   | 5   | 56  | 0.556 | 0.815 | 0.59  | -2.38 | 0.071(.213)  | 0.080(.196)  |
| CinguloOperc-rhMiddleCingulum           | 9   | 4   | 40  | 0.371 | 0.75  | 0.9   | -2.16 | 0.031(.189)  | 0.042(.175)  |
| CinguloOperc-rhMiddleCingulum           | 9   | 11  | 46  | 0.26  | 0.673 | 1.13  | -1.93 | 0.055(.213)  | 0.071(.208)  |
| CinguloOperc-rhMiddleCingulum           | 6   | 22  | 32  | 0.054 | 0.552 | 1.93  | -0.74 | 0.032(.203)  | 0.059(.202)  |
| CinguloOperc-rhSupplementaryMotor       | 16  | 1   | 68  | 0.969 | 0.989 | 0.04  | -2.54 | 0.033(.178)  | 0.034(.162)  |
| CinguloOperc-rhSupplementaryMotor       | 8   | -6  | 64  | 0.533 | 0.81  | 0.62  | -2.36 | 0.047(.164)  | 0.054(.163)  |
| CinguloOperc-rhPrecentral               | 42  | -2  | 47  | 0.414 | 0.75  | 0.82  | -2.22 | 0.033(.210)  | 0.044(.193)  |
| CinguloOperc-rhSupraMarginal            | 58  | -40 | 35  | 0.172 | 0.611 | 1.37  | -1.64 | 0.000(.192)  | 0.017(.176)  |
| CinguloOperc-rhSupraMarginal            | 55  | -27 | 30  | 0.027 | 0.482 | 2.21  | -0.18 | -0.050(.197) | -0.023(.177) |
| CinguloOperc-rhInsula                   | 39  | -14 | -5  | 0.211 | 0.635 | 1.25  | -1.8  | -0.032(.190) | -0.016(.193) |
| CinguloOperc-rhInsula                   | 40  | 1   | -13 | 0.75  | 0.945 | 0.32  | -2.49 | -0.009(.229) | -0.004(.207) |

|                                  |     |     |     |       |       |       |       |              |              |
|----------------------------------|-----|-----|-----|-------|-------|-------|-------|--------------|--------------|
| CinguloOperc-rhInsula            | 37  | 5   | 13  | 0.199 | 0.631 | 1.29  | -1.75 | 0.009(.231)  | 0.027(.200)  |
| CinguloOperc-rhInsula            | 40  | 10  | -2  | 0.089 | 0.552 | 1.7   | -1.13 | 0.026(.201)  | 0.048(.184)  |
| CinguloOperc-rhInsula            | 36  | 6   | 6   | 0.621 | 0.879 | 0.49  | -2.43 | 0.019(.197)  | 0.026(.188)  |
| CinguloOperc-rhInsula            | 34  | 23  | 4   | 0.405 | 0.75  | 0.83  | -2.22 | 0.133(.262)  | 0.148(.247)  |
| CinguloOperc-rhInsula            | 34  | 24  | 10  | 0.928 | 0.983 | 0.09  | -2.55 | 0.093(.226)  | 0.095(.217)  |
| CinguloOperc-rhOpercularRolandic | 50  | 3   | 4   | 0.212 | 0.635 | 1.25  | -1.78 | 0.012(.201)  | 0.028(.190)  |
| CinguloOperc-rhSuperiorFrontal   | 24  | 51  | 24  | 0.351 | 0.75  | 0.93  | -2.12 | -0.016(.253) | -0.001(.227) |
| CinguloOperc-rhMiddleFrontal     | 31  | 40  | 26  | 0.479 | 0.777 | 0.71  | -2.32 | 0.012(.235)  | 0.022(.207)  |
| CinguloParietal-lhMiddleCingulum | -6  | -26 | 28  | 0.4   | 0.75  | 0.84  | -2.22 | 0.023(.278)  | 0.038(.258)  |
| CinguloParietal-lhPrecuneus      | -13 | -65 | 32  | 0.928 | 0.983 | -0.09 | -2.56 | -0.010(.264) | -0.011(.246) |
| CinguloParietal-lhPrecuneus      | -11 | -73 | 43  | 0.409 | 0.75  | 0.83  | -2.23 | -0.002(.252) | 0.011(.236)  |
| CinguloParietal-rhMiddleCingulum | 8   | -27 | 28  | 0.285 | 0.676 | 1.07  | -2    | 0.023(.279)  | 0.043(.263)  |
| CinguloParietal-rhCuneus         | 16  | -70 | 40  | 0.625 | 0.879 | 0.49  | -2.44 | 0.014(.256)  | 0.022(.221)  |
| Default-lhPrecuneus              | -11 | -52 | 36  | 0.853 | 0.969 | 0.19  | -2.55 | -0.002(.202) | 0.001(.200)  |
| Default-lhSuperiorFrontal        | -12 | 27  | 57  | 0.169 | 0.608 | -1.38 | -1.63 | 0.001(.160)  | -0.013(.151) |
| Default-lhAngular                | -47 | -58 | 31  | 0.958 | 0.989 | 0.05  | -2.57 | -0.007(.193) | -0.007(.182) |
| Default-lhMedialSuperiorFrontal  | -6  | 42  | 35  | 0.67  | 0.901 | -0.43 | -2.46 | 0.011(.207)  | 0.006(.189)  |
| Default-lhMiddleCingulum         | -2  | -18 | 39  | 0.704 | 0.924 | 0.38  | -2.49 | 0.002(.231)  | 0.008(.211)  |
| Default-lhSuperiorFrontal        | -20 | 30  | 46  | 0.04  | 0.552 | -2.06 | -0.48 | 0.035(.152)  | 0.011(.166)  |
| Default-lhMiddleOccipital        | -39 | -74 | 38  | 0.712 | 0.932 | -0.37 | -2.49 | 0.013(.201)  | 0.008(.197)  |
| Default-lhOrbitalSuperiorFrontal | -28 | 54  | 0   | 0.118 | 0.56  | -1.56 | -1.35 | 0.075(.340)  | 0.038(.332)  |
| Default-lhOrbitalMedialFrontal   | -6  | 55  | -11 | 0.677 | 0.903 | -0.42 | -2.46 | -0.034(.388) | -0.046(.386) |
| Default-lhOrbitalMedialFrontal   | -7  | 38  | -9  | 0.935 | 0.983 | 0.08  | -2.53 | 0.013(.335)  | 0.015(.340)  |
| Default-lhMiddleTemporal         | -63 | -29 | -7  | 0.146 | 0.584 | 1.45  | -1.48 | -0.017(.296) | 0.012(.275)  |
| Default-lhMiddleTemporal         | -53 | -11 | -16 | 0.279 | 0.676 | -1.08 | -1.97 | -0.019(.234) | -0.036(.219) |
| Default-lhSuperiorFrontal        | -16 | 49  | 37  | 0.206 | 0.635 | -1.26 | -1.77 | 0.005(.204)  | -0.011(.191) |
| Default-lhSuperiorFrontal        | -20 | 56  | 28  | 0.149 | 0.584 | -1.44 | -1.52 | -0.000(.212) | -0.021(.206) |
| Default-lhMedialSuperiorFrontal  | -6  | 55  | 18  | 0.113 | 0.56  | -1.59 | -1.31 | 0.015(.218)  | -0.008(.202) |
| Default-lhSuperiorFrontal        | -16 | 65  | 14  | 0.306 | 0.695 | -1.02 | -2.02 | 0.028(.315)  | 0.006(.302)  |
| Default-lhAnteriorCingulum       | -6  | 45  | 6   | 0.12  | 0.56  | -1.56 | -1.36 | 0.067(.224)  | 0.043(.218)  |
| Default-lhMiddleFrontal          | -26 | 27  | 39  | 0.274 | 0.676 | -1.09 | -1.98 | 0.017(.214)  | 0.001(.204)  |
| Default-lhMiddleFrontal          | -29 | 17  | 51  | 0.999 | 0.999 | 0     | -2.56 | 0.040(.204)  | 0.040(.188)  |
| Default-lhMiddleFrontal          | -42 | 16  | 48  | 0.384 | 0.75  | -0.87 | -2.18 | 0.017(.189)  | 0.006(.181)  |
| Default-rhPrecuneus              | 12  | -52 | 34  | 0.478 | 0.777 | 0.71  | -2.32 | -0.014(.201) | -0.005(.191) |
| Default-rhSupplementaryMotor     | 12  | 22  | 60  | 0.856 | 0.969 | -0.18 | -2.54 | -0.020(.157) | -0.021(.143) |
| Default-rhAnteriorCingulum       | 8   | 44  | 6   | 0.898 | 0.98  | -0.13 | -2.55 | 0.053(.214)  | 0.051(.213)  |

|                                        |     |     |     |       |       |       |       |              |              |
|----------------------------------------|-----|-----|-----|-------|-------|-------|-------|--------------|--------------|
| Default-rhMiddleCingulum               | 3   | -20 | 38  | 0.442 | 0.75  | 0.77  | -2.27 | -0.014(.244) | -0.002(.225) |
| Default-rhSuperiorFrontal              | 22  | 21  | 46  | 0.236 | 0.665 | -1.18 | -1.87 | 0.023(.178)  | 0.009(.170)  |
| Default-rhAngular                      | 49  | -53 | 29  | 0.994 | 0.999 | 0.01  | -2.56 | -0.018(.199) | -0.017(.185) |
| Default-rhMiddleTemporal               | 62  | -26 | -6  | 0.357 | 0.75  | 0.92  | -2.13 | -0.016(.248) | -0.000(.236) |
| Default-rhPrecuneus                    | 7   | -69 | 50  | 0.26  | 0.673 | 1.13  | -1.92 | 0.025(.295)  | 0.046(.264)  |
| Default-rhAngular                      | 46  | -67 | 36  | 0.864 | 0.969 | -0.17 | -2.54 | 0.013(.196)  | 0.011(.187)  |
| Default-rhOrbitalMedialFrontal         | 5   | 65  | -7  | 0.122 | 0.56  | 1.55  | -1.33 | -0.064(.418) | -0.016(.424) |
| Default-rhOrbitalMedialFrontal         | 7   | 48  | -10 | 0.784 | 0.945 | 0.27  | -2.51 | -0.059(.392) | -0.052(.372) |
| Default-rhMiddleTemporal               | 58  | -7  | -16 | 0.745 | 0.945 | 0.32  | -2.49 | -0.033(.226) | -0.028(.220) |
| Default-rhMiddleFrontal                | 21  | 33  | 42  | 0.64  | 0.879 | -0.47 | -2.45 | 0.003(.182)  | -0.003(.178) |
| Default-rhSuperiorFrontal              | 21  | 43  | 35  | 0.285 | 0.676 | -1.07 | -1.98 | 0.012(.204)  | -0.003(.196) |
| Default-rhSuperiorFrontal              | 16  | 61  | 20  | 0.939 | 0.984 | 0.08  | -2.53 | -0.019(.263) | -0.018(.244) |
| Default-rhMedialSuperiorFrontal        | 8   | 54  | 14  | 0.635 | 0.879 | -0.47 | -2.45 | -0.007(.225) | -0.014(.205) |
| Default-rhMedialSuperiorFrontal        | 6   | 55  | 29  | 0.239 | 0.666 | -1.18 | -1.86 | -0.020(.224) | -0.038(.215) |
| Default-rhSuperiorFrontal              | 14  | 47  | 42  | 0.681 | 0.905 | -0.41 | -2.47 | -0.015(.177) | -0.020(.184) |
| Default-rhMedialSuperiorFrontal        | 7   | 44  | 35  | 0.897 | 0.98  | -0.13 | -2.54 | 0.013(.186)  | 0.012(.183)  |
| Default-rhMiddleFrontal                | 31  | 19  | 49  | 0.963 | 0.989 | 0.05  | -2.55 | 0.032(.211)  | 0.032(.201)  |
| Default-rhSuperiorTemporal             | 54  | 1   | -13 | 0.801 | 0.946 | -0.25 | -2.53 | -0.011(.233) | -0.015(.219) |
| DorsalAttn-lhPrecentral                | -27 | -7  | 46  | 0.069 | 0.552 | 1.82  | -0.93 | 0.008(.183)  | 0.030(.178)  |
| DorsalAttn-lhMiddleFrontal             | -27 | 2   | 53  | 0.382 | 0.75  | 0.87  | -2.18 | 0.015(.190)  | 0.026(.169)  |
| DorsalAttn-lhSuperiorFrontal           | -20 | 6   | 56  | 0.478 | 0.777 | 0.71  | -2.31 | 0.012(.190)  | 0.021(.182)  |
| DorsalAttn-lhSuperiorFrontal           | -21 | 0   | 63  | 0.469 | 0.777 | 0.72  | -2.3  | 0.013(.159)  | 0.020(.154)  |
| DorsalAttn-lhInferiorParietal          | -31 | -49 | 47  | 0.974 | 0.989 | -0.03 | -2.57 | 0.037(.217)  | 0.036(.193)  |
| DorsalAttn-lhInferiorParietal          | -43 | -45 | 43  | 0.29  | 0.676 | 1.06  | -2.01 | 0.074(.217)  | 0.088(.195)  |
| DorsalAttn-lhInferiorParietal          | -52 | -31 | 40  | 0.198 | 0.631 | 1.29  | -1.75 | 0.006(.190)  | 0.023(.190)  |
| DorsalAttn-lhTriangularInferiorFrontal | -44 | 36  | 8   | 0.254 | 0.673 | -1.14 | -1.92 | -0.015(.266) | -0.035(.258) |
| DorsalAttn-lhSuperiorParietal          | -20 | -65 | 51  | 0.539 | 0.81  | 0.61  | -2.37 | -0.001(.218) | 0.008(.202)  |
| DorsalAttn-lhMiddleOccipital           | -26 | -65 | 32  | 0.408 | 0.75  | 0.83  | -2.23 | 0.033(.234)  | 0.045(.217)  |
| DorsalAttn-lhPrecuneus                 | -10 | -57 | 60  | 0.786 | 0.945 | 0.27  | -2.51 | -0.003(.183) | 0.001(.185)  |
| DorsalAttn-lhPrecuneus                 | -7  | -64 | 55  | 0.066 | 0.552 | 1.84  | -0.9  | -0.002(.250) | 0.029(.236)  |
| DorsalAttn-lhMiddleOccipital           | -30 | -74 | 36  | 0.159 | 0.601 | 1.41  | -1.59 | 0.028(.246)  | 0.050(.226)  |
| DorsalAttn-lhInferiorTemporal          | -46 | -58 | -8  | 0.349 | 0.75  | 0.94  | -2.12 | -0.013(.183) | -0.001(.180) |
| DorsalAttn-lhPrecentral                | -45 | 3   | 32  | 0.53  | 0.81  | 0.63  | -2.37 | 0.028(.213)  | 0.037(.210)  |
| DorsalAttn-lhPrecentral                | -35 | 6   | 34  | 0.074 | 0.552 | 1.79  | -0.98 | -0.002(.276) | 0.032(.275)  |

|                                            |     |     |    |       |       |       |       |              |              |
|--------------------------------------------|-----|-----|----|-------|-------|-------|-------|--------------|--------------|
| DorsalAttn-lhMiddleFrontal                 | -38 | 38  | 17 | 0.747 | 0.945 | 0.32  | -2.52 | 0.034(.249)  | 0.039(.240)  |
| DorsalAttn-lhOpercularInferiorFrontal      | -42 | 9   | 22 | 0.566 | 0.823 | -0.57 | -2.4  | 0.027(.256)  | 0.017(.247)  |
| DorsalAttn-lhMiddleFrontal                 | -36 | 33  | 32 | 0.929 | 0.983 | 0.09  | -2.55 | 0.021(.227)  | 0.023(.205)  |
| DorsalAttn-rhPrecuneus                     | 10  | -57 | 58 | 0.109 | 0.56  | 1.6   | -1.29 | -0.010(.192) | 0.011(.186)  |
| DorsalAttn-rhMiddleFrontal                 | 29  | 2   | 52 | 0.804 | 0.946 | 0.25  | -2.53 | 0.029(.193)  | 0.032(.166)  |
| DorsalAttn-rhPrecentral                    | 30  | -8  | 47 | 0.044 | 0.552 | 2.01  | -0.57 | 0.010(.220)  | 0.037(.188)  |
| DorsalAttn-rhSuperiorFrontal               | 23  | 6   | 58 | 0.106 | 0.56  | 1.62  | -1.27 | 0.017(.170)  | 0.036(.169)  |
| DorsalAttn-rhInferiorParietal              | 39  | -43 | 40 | 0.556 | 0.815 | 0.59  | -2.39 | 0.085(.236)  | 0.094(.210)  |
| DorsalAttn-rhMiddleFrontal                 | 37  | 38  | 13 | 0.764 | 0.945 | -0.3  | -2.52 | 0.065(.251)  | 0.060(.226)  |
| DorsalAttn-rhTriangularInferiorFrontal     | 48  | 38  | 2  | 0.935 | 0.983 | 0.08  | -2.54 | -0.050(.304) | -0.048(.290) |
| DorsalAttn-rhSuperiorParietal              | 23  | -66 | 52 | 0.196 | 0.631 | 1.29  | -1.73 | -0.003(.229) | 0.016(.201)  |
| DorsalAttn-rhMiddleOccipital               | 32  | -64 | 34 | 0.014 | 0.476 | 2.47  | 0.43  | 0.032(.233)  | 0.069(.214)  |
| DorsalAttn-rhInferiorParietal              | 34  | -48 | 49 | 0.405 | 0.75  | 0.83  | -2.22 | 0.051(.217)  | 0.062(.198)  |
| DorsalAttn-rhMiddleTemporal                | 57  | -54 | -1 | 0.446 | 0.75  | 0.76  | -2.26 | 0.000(.229)  | 0.012(.212)  |
| DorsalAttn-rhPrecentral                    | 47  | 2   | 38 | 0.252 | 0.672 | 1.15  | -1.92 | 0.051(.253)  | 0.068(.220)  |
| DorsalAttn-rhOpercularInferiorFrontal      | 47  | 8   | 19 | 0.042 | 0.552 | 2.03  | -0.54 | 0.021(.213)  | 0.048(.191)  |
| FrontoParietal-lhMiddleFrontal             | -38 | 49  | 10 | 0.357 | 0.75  | 0.92  | -2.13 | 0.025(.289)  | 0.043(.273)  |
| FrontoParietal-lhInferiorTemporal          | -56 | -48 | -9 | 0.284 | 0.676 | -1.07 | -1.98 | 0.060(.241)  | 0.042(.232)  |
| FrontoParietal-lhMedialSuperiorFrontal     | -6  | 29  | 44 | 0.491 | 0.786 | 0.69  | -2.32 | 0.017(.184)  | 0.025(.175)  |
| FrontoParietal-lhOrbitalMiddleFrontal      | -40 | 50  | -5 | 0.677 | 0.903 | 0.42  | -2.44 | -0.002(.354) | 0.008(.335)  |
| FrontoParietal-lhAngular                   | -34 | -61 | 42 | 0.696 | 0.921 | -0.39 | -2.48 | 0.096(.226)  | 0.090(.224)  |
| FrontoParietal-lhOpercularInferiorFrontal  | -43 | 19  | 34 | 0.586 | 0.848 | 0.55  | -2.42 | 0.019(.275)  | 0.029(.252)  |
| FrontoParietal-lhTriangularInferiorFrontal | -40 | 24  | 23 | 0.214 | 0.635 | -1.24 | -1.8  | 0.026(.245)  | 0.005(.241)  |
| FrontoParietal-lhSuperiorFrontal           | -21 | 63  | 2  | 0.444 | 0.75  | -0.77 | -2.24 | 0.057(.328)  | 0.040(.307)  |
| FrontoParietal-lhMiddleFrontal             | -29 | 51  | 10 | 0.408 | 0.75  | -0.83 | -2.22 | 0.063(.298)  | 0.047(.279)  |
| FrontoParietal-rhSupraMarginal             | 48  | -42 | 42 | 0.435 | 0.75  | 0.78  | -2.27 | 0.090(.230)  | 0.101(.200)  |
| FrontoParietal-rhMiddleFrontal             | 38  | 46  | 8  | 0.888 | 0.98  | 0.14  | -2.55 | 0.050(.291)  | 0.052(.258)  |

|                                                |            |            |           |              |              |             |             |                     |                    |
|------------------------------------------------|------------|------------|-----------|--------------|--------------|-------------|-------------|---------------------|--------------------|
| FrontoParietal-<br>rhInferiorTemporal          | 60         | -41        | -11       | 0.322        | 0.717        | 0.99        | -2.05       | 0.037(.252)         | 0.054(.244)        |
| FrontoParietal-<br>rhSupplementaryMotor        | 7          | 26         | 47        | 0.769        | 0.945        | -0.29       | -2.51       | 0.071(.186)         | 0.068(.183)        |
| FrontoParietal-<br>rhOrbitalInferiorFrontal    | 43         | 48         | -5        | 0.418        | 0.75         | -0.81       | -2.19       | 0.045(.329)         | 0.027(.308)        |
| FrontoParietal-<br>rhInferiorParietal          | 42         | -54        | 44        | 0.935        | 0.983        | -0.08       | -2.55       | 0.088(.258)         | 0.087(.230)        |
| FrontoParietal-rhAngular                       | 36         | -57        | 45        | 0.438        | 0.75         | 0.78        | -2.26       | 0.087(.274)         | 0.101(.254)        |
| FrontoParietal-<br>rhMiddleFrontal             | 38         | 29         | 36        | 0.298        | 0.691        | 1.04        | -2.01       | 0.025(.234)         | 0.040(.206)        |
| FrontoParietal-<br>rhTriangularInferiorFrontal | 42         | 29         | 22        | 0.606        | 0.863        | -0.52       | -2.43       | 0.066(.271)         | 0.057(.245)        |
| FrontoParietal-<br>rhTriangularInferiorFrontal | 39         | 19         | 26        | 0.629        | 0.879        | 0.48        | -2.45       | 0.004(.286)         | 0.012(.259)        |
| FrontoParietal-<br>rhOrbitalSuperiorFrontal    | 28         | 57         | -5        | 0.84         | 0.966        | -0.2        | -2.5        | 0.044(.383)         | 0.039(.350)        |
| FrontoParietal-<br>rhSuperiorFrontal           | 24         | 59         | 5         | 0.539        | 0.81         | 0.62        | -2.34       | 0.029(.288)         | 0.041(.285)        |
| FrontoParietal-<br>rhSuperiorFrontal           | 31         | 52         | 10        | 0.447        | 0.75         | 0.76        | -2.27       | 0.040(.307)         | 0.055(.283)        |
| FrontoParietal-<br>rhMiddleFrontal             | 42         | 20         | 48        | 0.999        | 0.999        | 0           | -2.55       | 0.025(.196)         | 0.025(.175)        |
| FrontoParietal-<br>rhMiddleFrontal             | 39         | 10         | 43        | 0.861        | 0.969        | -0.18       | -2.55       | 0.015(.235)         | 0.012(.215)        |
| None-<br>lhSuperiorPoleTemporal                | -29        | 5          | -27       | 0.124        | 0.56         | -1.54       | -1.38       | 0.008(.290)         | -0.022(.270)       |
| None-lhParaHippocampal                         | -29        | -36        | -8        | 0.955        | 0.989        | -0.06       | -2.55       | 0.021(.189)         | 0.020(.184)        |
| <b>None-lhLingual</b>                          | <b>-18</b> | <b>-39</b> | <b>-1</b> | <b>0.004</b> | <b>0.423</b> | <b>2.91</b> | <b>1.61</b> | <b>-0.023(.244)</b> | <b>0.024(.231)</b> |
| None-<br>lhMiddlePoleTemporal                  | -34        | 17         | -32       | 0.057        | 0.552        | -1.91       | -0.74       | -0.002(.219)        | -0.031(.213)       |
| None-<br>lhOrbitalSuperiorFrontal              | -23        | 61         | -7        | 0.56         | 0.819        | 0.58        | -2.34       | 0.019(.505)         | 0.040(.494)        |
| None-lhAmygdala                                | -32        | 3          | -17       | 0.262        | 0.673        | -1.12       | -1.94       | 0.036(.376)         | 0.008(.359)        |
| None-<br>lhOrbitalInferiorFrontal              | -35        | 36         | -10       | 0.803        | 0.946        | -0.25       | -2.52       | -0.080(.305)        | -0.085(.324)       |
| None-<br>lhOrbitalMiddleFrontal                | -22        | 32         | -14       | 0.905        | 0.98         | 0.12        | -2.54       | -0.005(.274)        | -0.003(.262)       |
| None-<br>lhOrbitalSuperiorFrontal              | -24        | 52         | -13       | 0.801        | 0.946        | 0.25        | -2.49       | 0.057(.460)         | 0.065(.407)        |
| None-<br>lhOrbitalSuperiorFrontal              | -17        | 47         | -18       | 0.084        | 0.552        | 1.73        | -1.07       | -0.009(.511)        | 0.052(.504)        |
| None-<br>lhOrbitalSuperiorFrontal              | -13        | 24         | -16       | 0.03         | 0.485        | 2.17        | -0.24       | -0.045(.488)        | 0.030(.489)        |
| None-lhRectus                                  | -9         | 46         | -21       | 0.67         | 0.901        | 0.43        | -2.44       | 0.095(1.273)        | 0.057(1.275)       |
| None-lhRectus                                  | -2         | 34         | -26       | 0.036        | 0.549        | 2.1         | -0.39       | 0.293(1.513)        | 0.074(1.489)       |
| None-lhInferiorTemporal                        | -53        | -13        | -29       | 0.789        | 0.945        | 0.27        | -2.5        | -0.036(.533)        | -0.027(.502)       |
| None-lhInferiorTemporal                        | -45        | 9          | -37       | 0.252        | 0.672        | -1.15       | -1.89       | -0.037(.201)        | -0.053(.196)       |
| None-lhInferiorTemporal                        | -55        | -40        | -16       | 0.189        | 0.631        | 1.31        | -1.68       | 0.032(.340)         | 0.062(.317)        |

|                                   |     |     |     |       |       |       |       |              |              |
|-----------------------------------|-----|-----|-----|-------|-------|-------|-------|--------------|--------------|
| None-lhFusiform                   | -32 | -4  | -45 | 0.935 | 0.983 | 0.08  | -2.51 | -0.080(.439) | -0.077(.411) |
| None-lhInferiorTemporal           | -39 | -13 | -27 | 0.33  | 0.726 | 0.97  | -2.04 | -0.066(.268) | -0.047(.262) |
| None-lhParaHippocampal            | -20 | -13 | -24 | 0.829 | 0.966 | -0.22 | -2.5  | 0.004(.275)  | -0.000(.285) |
| None-lhParaHippocampal            | -22 | -22 | -17 | 0.979 | 0.99  | -0.03 | -2.56 | -0.013(.296) | -0.013(.277) |
| None-lhSuperiorPoleTemporal       | -51 | 7   | -20 | 0.527 | 0.81  | -0.63 | -2.35 | -0.046(.190) | -0.054(.184) |
| None-rhSuperiorPoleTemporal       | 32  | 14  | -30 | 0.527 | 0.81  | -0.63 | -2.33 | 0.003(.236)  | -0.007(.235) |
| None-rhParaHippocampal            | 25  | -36 | -5  | 0.06  | 0.552 | 1.88  | -0.82 | 0.010(.215)  | 0.037(.205)  |
| None-rhParaHippocampal            | 19  | -30 | -10 | 0.177 | 0.617 | 1.35  | -1.66 | -0.049(.345) | -0.015(.365) |
| None-rhRectus                     | 3   | 19  | -23 | 0.725 | 0.933 | -0.35 | -2.47 | 0.018(.722)  | -0.000(.726) |
| None-rhOrbitalInferiorFrontal     | 35  | 37  | -8  | 0.594 | 0.858 | -0.53 | -2.41 | -0.058(.291) | -0.068(.269) |
| None-rhOlfactory                  | 25  | 9   | -16 | 0.372 | 0.75  | 0.89  | -2.15 | 0.002(.343)  | 0.023(.333)  |
| None-rhOrbitalSuperiorFrontal     | 21  | 30  | -15 | 0.541 | 0.81  | -0.61 | -2.36 | 0.016(.287)  | 0.004(.272)  |
| None-rhOrbitalSuperiorFrontal     | 22  | 51  | -14 | 0.864 | 0.969 | 0.17  | -2.51 | 0.061(.474)  | 0.066(.417)  |
| None-rhOrbitalSuperiorFrontal     | 12  | 26  | -25 | 0.021 | 0.482 | 2.3   | 0.06  | 0.125(1.254) | 0.071(1.203) |
| None-rhRectus                     | 14  | 20  | -15 | 0.473 | 0.777 | -0.72 | -2.29 | 0.085(.421)  | 0.066(.377)  |
| None-rhRectus                     | 11  | 39  | -20 | 0.639 | 0.879 | 0.47  | -2.43 | -0.039(.824) | -0.012(.819) |
| None-lhRectus                     | 2   | 39  | -26 | 0.7   | 0.923 | -0.39 | -2.47 | 0.151(1.476) | 0.189(1.406) |
| None-rhInferiorTemporal           | 62  | -26 | -16 | 0.63  | 0.879 | -0.48 | -2.41 | 0.075(.379)  | 0.062(.387)  |
| None-rhInferiorTemporal           | 55  | -8  | -27 | 0.971 | 0.989 | -0.04 | -2.52 | -0.045(.415) | -0.046(.374) |
| None-rhMiddlePoleTemporal         | 45  | 14  | -30 | 0.487 | 0.786 | 0.7   | -2.3  | -0.042(.192) | -0.033(.172) |
| None-rhParaHippocampal            | 20  | -21 | -22 | 0.131 | 0.567 | 1.51  | -1.42 | -0.036(.300) | -0.004(.298) |
| None-rhFusiform                   | 28  | 0   | -37 | 0.753 | 0.945 | -0.32 | -2.48 | 0.032(.607)  | 0.021(.524)  |
| None-rhInferiorTemporal           | 37  | 8   | -38 | 0.49  | 0.786 | -0.69 | -2.28 | -0.015(.282) | -0.028(.258) |
| None-rhInferiorTemporal           | 54  | -10 | -37 | 0.355 | 0.75  | 0.93  | -2.08 | -0.051(.472) | -0.021(.438) |
| None-rhInferiorTemporal           | 56  | -27 | -19 | 0.628 | 0.879 | 0.48  | -2.42 | 0.034(.704)  | 0.057(.659)  |
| None-rhFusiform                   | 31  | 2   | -46 | 0.78  | 0.945 | -0.28 | -2.47 | 0.011(.547)  | 0.001(.500)  |
| None-rhFusiform                   | 40  | -12 | -30 | 0.283 | 0.676 | -1.07 | -1.95 | 0.014(.300)  | -0.009(.293) |
| None-rhFusiform                   | 32  | -9  | -36 | 0.781 | 0.945 | -0.28 | -2.46 | 0.014(.421)  | 0.006(.386)  |
| None-rhInferiorTemporal           | 43  | -24 | -21 | 0.243 | 0.666 | 1.17  | -1.84 | -0.036(.370) | -0.006(.357) |
| None-rhParaHippocampal            | 20  | -11 | -25 | 0.095 | 0.552 | 1.67  | -1.16 | -0.046(.309) | -0.013(.268) |
| None-rhParaHippocampal            | 30  | -19 | -19 | 0.729 | 0.933 | 0.35  | -2.49 | -0.012(.309) | -0.005(.291) |
| RetrosplenialTemporal-lhCalcarine | -14 | -58 | 18  | 0.6   | 0.859 | -0.52 | -2.43 | -0.065(.230) | -0.073(.226) |
| RetrosplenialTemporal-lhLingual   | -9  | -50 | 4   | 0.759 | 0.945 | -0.31 | -2.52 | -0.056(.280) | -0.061(.261) |
| RetrosplenialTemporal-lhFusiform  | -34 | -33 | -15 | 0.218 | 0.641 | 1.23  | -1.81 | -0.059(.201) | -0.043(.186) |
| RetrosplenialTemporal-lhFusiform  | -22 | -37 | -15 | 0.432 | 0.75  | 0.79  | -2.25 | -0.054(.219) | -0.042(.216) |
| RetrosplenialTemporal-rhCalcarine | 14  | -54 | 11  | 0.119 | 0.56  | 1.56  | -1.37 | -0.093(.238) | -0.069(.224) |
| RetrosplenialTemporal-rhFusiform  | 35  | -36 | -12 | 0.739 | 0.943 | 0.33  | -2.5  | -0.057(.238) | -0.052(.229) |

|                                  |     |     |     |       |       |       |       |              |              |
|----------------------------------|-----|-----|-----|-------|-------|-------|-------|--------------|--------------|
| RetrosplenialTemporal-rhFusiform | 35  | -24 | -20 | 0.835 | 0.966 | 0.21  | -2.53 | -0.024(.232) | -0.021(.218) |
| RetrosplenialTemporal-rhFusiform | 24  | -36 | -13 | 0.551 | 0.815 | 0.6   | -2.37 | -0.057(.242) | -0.048(.226) |
| SaliencelhAnteriorCingulum       | -10 | 34  | 22  | 0.084 | 0.552 | 1.73  | -1.09 | 0.044(.223)  | 0.071(.222)  |
| SaliencelhInsula                 | -32 | 17  | -8  | 0.015 | 0.476 | 2.44  | 0.36  | 0.062(.290)  | 0.107(.263)  |
| SaliencerhAnteriorCingulum       | 8   | 35  | 23  | 0.164 | 0.602 | 1.39  | -1.6  | 0.057(.224)  | 0.080(.234)  |
| SaliencerhInsula                 | 31  | 23  | -5  | 0.022 | 0.482 | 2.29  | 0.02  | 0.097(.289)  | 0.140(.270)  |
| SMhand-lhSuperiorParietal        | -19 | -49 | 65  | 0.052 | 0.552 | 1.95  | -0.69 | -0.036(.180) | -0.013(.167) |
| SMhand-lhPrecuneus               | -11 | -48 | 60  | 0.015 | 0.476 | 2.42  | 0.33  | -0.039(.219) | -0.003(.215) |
| SMhand-lhLobuleParacentral       | -16 | -33 | 66  | 0.244 | 0.666 | 1.17  | -1.9  | 0.006(.274)  | 0.027(.258)  |
| SMhand-lhLobuleParacentral       | -11 | -29 | 70  | 0.145 | 0.584 | 1.46  | -1.5  | 0.001(.175)  | 0.019(.173)  |
| SMhand-lhLobuleParacentral       | -7  | -20 | 74  | 0.25  | 0.672 | 1.15  | -1.88 | -0.017(.228) | 0.001(.211)  |
| SMhand-lhPrecuneus               | -11 | -41 | 65  | 0.554 | 0.815 | 0.59  | -2.38 | -0.024(.197) | -0.016(.184) |
| SMhand-lhLobuleParacentral       | -5  | -28 | 60  | 0.107 | 0.56  | 1.61  | -1.29 | -0.026(.185) | -0.006(.179) |
| SMhand-lhMiddleCingulum          | -5  | -16 | 49  | 0.905 | 0.98  | 0.12  | -2.56 | 0.021(.221)  | 0.023(.200)  |
| SMhand-lhPostcentral             | -36 | -30 | 54  | 0.183 | 0.624 | 1.33  | -1.69 | 0.041(.268)  | 0.066(.269)  |
| SMhand-lhPrecentral              | -37 | -23 | 62  | 0.89  | 0.98  | 0.14  | -2.53 | 0.051(.183)  | 0.053(.180)  |
| SMhand-lhPrecentral              | -20 | -25 | 64  | 0.896 | 0.98  | 0.13  | -2.53 | 0.014(.196)  | 0.016(.181)  |
| SMhand-lhPrecentral              | -23 | -14 | 64  | 0.139 | 0.584 | 1.48  | -1.48 | 0.026(.176)  | 0.042(.161)  |
| SMhand-lhLobuleParacentral       | -17 | -9  | 68  | 0.163 | 0.602 | 1.39  | -1.6  | 0.019(.160)  | 0.033(.144)  |
| SMhand-lhSuperiorParietal        | -29 | -45 | 62  | 0.089 | 0.552 | 1.7   | -1.14 | -0.022(.186) | -0.001(.180) |
| SMhand-lhInferiorParietal        | -54 | -21 | 41  | 0.282 | 0.676 | 1.08  | -1.99 | -0.002(.203) | 0.013(.207)  |
| SMhand-lhPostcentral             | -35 | -35 | 42  | 0.084 | 0.552 | 1.73  | -1.1  | -0.005(.204) | 0.018(.198)  |
| SMhand-lhPostcentral             | -28 | -37 | 61  | 0.372 | 0.75  | 0.89  | -2.16 | -0.011(.187) | -0.000(.165) |
| SMhand-lhPostcentral             | -47 | -31 | 55  | 0.37  | 0.75  | 0.9   | -2.16 | 0.025(.202)  | 0.038(.207)  |
| SMhand-rhSuperiorParietal        | 21  | -48 | 66  | 0.154 | 0.598 | 1.42  | -1.56 | -0.038(.184) | -0.021(.167) |
| SMhand-rhPostcentral             | 16  | -33 | 68  | 0.094 | 0.552 | 1.67  | -1.17 | -0.020(.265) | 0.010(.255)  |
| SMhand-rhLobuleParacentral       | 5   | -27 | 65  | 0.83  | 0.966 | 0.21  | -2.53 | -0.018(.184) | -0.015(.180) |
| SMhand-rhPostcentral             | 12  | -41 | 67  | 0.639 | 0.879 | -0.47 | -2.44 | -0.009(.198) | -0.015(.180) |
| SMhand-rhSupplementaryMotor      | 5   | -17 | 52  | 0.06  | 0.552 | 1.88  | -0.82 | -0.036(.250) | -0.008(.213) |
| SMhand-rhMiddleCingulum          | 7   | -8  | 51  | 0.016 | 0.476 | 2.4   | 0.27  | -0.005(.210) | 0.028(.196)  |
| SMhand-rhPrecentral              | 38  | -22 | 60  | 0.991 | 0.999 | -0.01 | -2.54 | 0.011(.157)  | 0.011(.157)  |
| SMhand-rhPrecentral              | 20  | -25 | 65  | 0.023 | 0.482 | 2.28  | 0     | -0.020(.183) | 0.008(.178)  |
| SMhand-rhPrecentral              | 12  | -28 | 70  | 0.415 | 0.75  | 0.82  | -2.23 | 0.004(.192)  | 0.015(.183)  |
| SMhand-rhPrecentral              | 29  | -14 | 64  | 0.083 | 0.552 | 1.73  | -1.09 | 0.002(.193)  | 0.024(.182)  |
| SMhand-rhPrecentral              | 17  | -17 | 71  | 0.029 | 0.482 | 2.19  | -0.2  | 0.003(.181)  | 0.030(.173)  |

|                                         |           |           |           |          |              |            |             |                    |                    |
|-----------------------------------------|-----------|-----------|-----------|----------|--------------|------------|-------------|--------------------|--------------------|
| SMhand-rhSuperiorFrontal                | 21        | -6        | 65        | 0.018    | 0.476        | 2.38       | 0.21        | 0.001(.160)        | 0.025(.147)        |
| SMhand-rhPostcentral                    | 30        | -42       | 60        | 0.177    | 0.617        | 1.35       | -1.67       | -0.042(.214)       | -0.023(.193)       |
| SMhand-rhInferiorParietal               | 34        | -41       | 52        | 0.084    | 0.552        | 1.73       | -1.09       | -0.041(.218)       | -0.014(.224)       |
| SMhand-rhSupraMarginal                  | 40        | -32       | 40        | 0.107    | 0.56         | 1.61       | -1.28       | -0.013(.205)       | 0.007(.186)        |
| SMhand-rhPostcentral                    | 28        | -35       | 63        | 0.123    | 0.56         | 1.54       | -1.38       | -0.036(.178)       | -0.019(.160)       |
| SMhand-rhPostcentral                    | 39        | -35       | 58        | 0.849    | 0.969        | 0.19       | -2.53       | -0.012(.197)       | -0.010(.191)       |
| SMhand-rhPostcentral                    | 37        | -26       | 51        | 0.21     | 0.635        | 1.25       | -1.78       | -0.016(.237)       | 0.003(.224)        |
| SMhand-rhPostcentral                    | 49        | -26       | 52        | 0.126    | 0.56         | 1.53       | -1.4        | -0.024(.212)       | -0.002(.198)       |
| SMhand-rhSupraMarginal                  | 53        | -23       | 39        | 0.088    | 0.552        | 1.71       | -1.14       | -0.020(.196)       | 0.002(.192)        |
| SMmouth-lhPostcentral                   | -52       | -8        | 38        | 0.441    | 0.75         | 0.77       | -2.27       | -0.003(.195)       | 0.008(.190)        |
| SMmouth-lhPostcentral                   | -42       | -12       | 50        | 0.42     | 0.75         | 0.81       | -2.23       | 0.037(.203)        | 0.048(.184)        |
| SMmouth-lhPostcentral                   | -52       | -12       | 30        | 0.415    | 0.75         | 0.82       | -2.24       | -0.030(.271)       | -0.014(.287)       |
| SMmouth-lhPostcentral                   | -46       | -18       | 53        | 0.183    | 0.624        | 1.33       | -1.69       | 0.041(.278)        | 0.066(.276)        |
| SMmouth-rhPostcentral                   | 50        | -7        | 36        | 0.493    | 0.786        | 0.69       | -2.33       | 0.000(.206)        | 0.010(.208)        |
| SMmouth-rhPrecentral                    | 42        | -11       | 47        | 0.326    | 0.723        | 0.98       | -2.08       | 0.028(.180)        | 0.040(.176)        |
| SMmouth-rhPostcentral                   | 54        | -8        | 26        | 0.28     | 0.676        | 1.08       | -1.99       | -0.043(.264)       | -0.022(.283)       |
| SMmouth-rhPrecentral                    | 48        | -15       | 49        | 0.391    | 0.75         | 0.86       | -2.2        | 0.001(.254)        | 0.017(.259)        |
| Subcortical-lhCerebellum                | NA        | NA        | NA        | 0.853    | 0.969        | -0.19      | -2.54       | 0.060(.258)        | 0.057(.260)        |
| Subcortical-lhThalamus                  | NA        | NA        | NA        | 0.928    | 0.983        | -0.09      | -2.56       | 0.044(.161)        | 0.043(.146)        |
| Subcortical-lhCaudate                   | NA        | NA        | NA        | 0.726    | 0.933        | 0.35       | -2.5        | 0.098(.235)        | 0.103(.216)        |
| Subcortical-lhPutamen                   | NA        | NA        | NA        | 0.184    | 0.624        | 1.33       | -1.69       | 0.059(.192)        | 0.076(.178)        |
| <b>Subcortical-lhPallidum</b>           | <b>NA</b> | <b>NA</b> | <b>NA</b> | <b>0</b> | <b>0.112</b> | <b>3.6</b> | <b>3.81</b> | <b>0.024(.157)</b> | <b>0.062(.152)</b> |
| Subcortical-brainStem                   | NA        | NA        | NA        | 0.516    | 0.81         | 0.65       | -2.33       | 0.032(.185)        | 0.040(.177)        |
| Subcortical-lhHippocampus               | NA        | NA        | NA        | 0.116    | 0.56         | 1.57       | -1.34       | -0.018(.142)       | -0.002(.148)       |
| Subcortical-lhAmygdala                  | NA        | NA        | NA        | 0.659    | 0.895        | -0.44      | -2.46       | -0.021(.192)       | -0.027(.179)       |
| Subcortical-lhAccumbens                 | NA        | NA        | NA        | 0.832    | 0.966        | -0.21      | -2.54       | 0.115(.247)        | 0.112(.236)        |
| Subcortical-lhVentraldc                 | NA        | NA        | NA        | 0.197    | 0.631        | 1.29       | -1.73       | 0.050(.196)        | 0.067(.188)        |
| Subcortical-rhCerebellum                | NA        | NA        | NA        | 0.837    | 0.966        | 0.21       | -2.53       | 0.045(.256)        | 0.049(.250)        |
| Subcortical-rhThalamus                  | NA        | NA        | NA        | 0.234    | 0.665        | 1.19       | -1.86       | 0.045(.171)        | 0.058(.158)        |
| Subcortical-rhCaudate                   | NA        | NA        | NA        | 0.301    | 0.692        | 1.04       | -2.04       | 0.105(.247)        | 0.121(.228)        |
| Subcortical-rhPutamen                   | NA        | NA        | NA        | 0.166    | 0.604        | 1.38       | -1.62       | 0.064(.206)        | 0.082(.185)        |
| Subcortical-rhPallidum                  | NA        | NA        | NA        | 0.08     | 0.552        | 1.75       | -1.05       | 0.041(.166)        | 0.060(.152)        |
| Subcortical-rhHippocampus               | NA        | NA        | NA        | 0.015    | 0.476        | 2.44       | 0.35        | -0.020(.158)       | 0.005(.151)        |
| Subcortical-rhAmygdala                  | NA        | NA        | NA        | 0.768    | 0.945        | -0.3       | -2.51       | -0.014(.208)       | -0.018(.192)       |
| Subcortical-rhAccumbens                 | NA        | NA        | NA        | 0.869    | 0.971        | 0.17       | -2.54       | 0.096(.247)        | 0.099(.227)        |
| Subcortical-rhVentraldc                 | NA        | NA        | NA        | 0.317    | 0.716        | 1          | -2.07       | 0.056(.204)        | 0.069(.188)        |
| VentralAttn-lhSupplementaryMotor        | -4        | 12        | 65        | 0.011    | 0.476        | 2.53       | 0.59        | -0.013(.170)       | 0.015(.161)        |
| VentralAttn-lhMiddleTemporal            | -45       | -54       | 15        | 0.125    | 0.56         | 1.53       | -1.41       | -0.042(.231)       | -0.018(.221)       |
| VentralAttn-lhMiddleTemporal            | -52       | -56       | 11        | 0.057    | 0.552        | 1.91       | -0.77       | -0.055(.235)       | -0.026(.221)       |
| VentralAttn-lhMiddleTemporal            | -48       | -40       | 2         | 0.079    | 0.552        | 1.76       | -1.05       | -0.070(.187)       | -0.048(.180)       |
| VentralAttn-lhTriangularInferiorFrontal | -50       | 21        | 11        | 0.424    | 0.75         | 0.8        | -2.25       | -0.077(.246)       | -0.064(.228)       |
| VentralAttn-lhOrbitalInferiorFrontal    | -47       | 39        | -9        | 0.288    | 0.676        | -1.06      | -1.98       | -0.079(.359)       | -0.103(.323)       |
| VentralAttn-lhInsula                    | -29       | 20        | -14       | 0.523    | 0.81         | -0.64      | -2.35       | -0.007(.203)       | -0.016(.201)       |

|                                         |     |     |     |       |       |       |       |              |              |
|-----------------------------------------|-----|-----|-----|-------|-------|-------|-------|--------------|--------------|
| VentralAttn-lhOrbitalInferiorFrontal    | -44 | 33  | -7  | 0.423 | 0.75  | 0.8   | -2.23 | -0.103(.260) | -0.088(.266) |
| VentralAttn-lhTriangularInferiorFrontal | -45 | 29  | 1   | 0.264 | 0.673 | -1.12 | -1.94 | -0.083(.309) | -0.104(.270) |
| VentralAttn-lhPrecentral                | -39 | 5   | 48  | 0.161 | 0.601 | 1.4   | -1.59 | -0.022(.205) | -0.002(.199) |
| VentralAttn-lhMiddleTemporal            | -59 | -18 | -3  | 0.6   | 0.859 | 0.52  | -2.43 | -0.049(.237) | -0.041(.225) |
| VentralAttn-rhMiddleTemporal            | 58  | -45 | 9   | 0.305 | 0.695 | 1.03  | -2.03 | -0.035(.225) | -0.020(.207) |
| VentralAttn-rhMiddleTemporal            | 61  | -39 | 2   | 0.278 | 0.676 | 1.09  | -1.98 | -0.056(.217) | -0.040(.212) |
| VentralAttn-rhSuperiorTemporal          | 57  | -17 | -3  | 0.096 | 0.552 | 1.67  | -1.18 | -0.032(.217) | -0.007(.211) |
| VentralAttn-rhSuperiorTemporal          | 47  | -40 | 13  | 0.356 | 0.75  | 0.92  | -2.15 | -0.011(.226) | 0.002(.209)  |
| VentralAttn-rhMiddleTemporal            | 46  | -37 | 3   | 0.438 | 0.75  | 0.78  | -2.27 | -0.031(.218) | -0.020(.205) |
| VentralAttn-rhSuperiorTemporal          | 48  | -26 | 0   | 0.764 | 0.945 | 0.3   | -2.52 | -0.015(.195) | -0.012(.187) |
| VentralAttn-rhTriangularInferiorFrontal | 52  | 24  | 10  | 0.234 | 0.665 | 1.19  | -1.85 | -0.053(.271) | -0.033(.244) |
| VentralAttn-rhOrbitalInferiorFrontal    | 48  | 38  | -9  | 0.975 | 0.989 | 0.03  | -2.55 | -0.079(.345) | -0.079(.319) |
| VentralAttn-rhOrbitalInferiorFrontal    | 45  | 31  | -6  | 0.5   | 0.789 | 0.68  | -2.32 | -0.049(.249) | -0.038(.221) |
| VentralAttn-rhInsula                    | 27  | 20  | -15 | 0.215 | 0.635 | 1.24  | -1.78 | 0.015(.224)  | 0.033(.206)  |
| VentralAttn-rhSuperiorTemporal          | 57  | -6  | -8  | 0.41  | 0.75  | 0.82  | -2.22 | -0.042(.218) | -0.030(.212) |
| VentralAttn-rhMiddleTemporal            | 47  | -22 | -8  | 0.432 | 0.75  | -0.79 | -2.26 | -0.007(.287) | -0.021(.257) |
| Visual-lhSuperiorOccipital              | -18 | -86 | 22  | 0.418 | 0.75  | 0.81  | -2.24 | -0.038(.241) | -0.026(.220) |
| Visual-lhLingual                        | -17 | -60 | -5  | 0.777 | 0.945 | 0.28  | -2.52 | 0.000(.257)  | 0.005(.239)  |
| Visual-lhCalcarine                      | -11 | -83 | 4   | 0.478 | 0.777 | 0.71  | -2.32 | 0.026(.354)  | 0.043(.339)  |
| Visual-lhLingual                        | -22 | -58 | 2   | 0.669 | 0.901 | 0.43  | -2.46 | -0.021(.380) | -0.011(.359) |
| Visual-lhLingual                        | -10 | -58 | 3   | 0.802 | 0.946 | 0.25  | -2.52 | -0.096(.502) | -0.087(.520) |
| Visual-lhLingual                        | -17 | -46 | -4  | 0.642 | 0.879 | 0.47  | -2.45 | -0.024(.317) | -0.013(.314) |
| Visual-lhSuperiorOccipital              | -14 | -77 | 27  | 0.112 | 0.56  | 1.59  | -1.32 | -0.026(.219) | -0.002(.214) |
| Visual-lhMiddleOccipital                | -31 | -84 | 9   | 0.199 | 0.631 | 1.28  | -1.75 | -0.076(.269) | -0.054(.246) |
| Visual-lhMiddleOccipital                | -34 | -87 | 0   | 0.224 | 0.649 | 1.22  | -1.82 | -0.058(.279) | -0.035(.277) |
| Visual-lhMiddleOccipital                | -43 | -68 | 10  | 0.204 | 0.635 | 1.27  | -1.77 | -0.018(.210) | -0.001(.193) |
| Visual-lhFusiform                       | -29 | -59 | -9  | 0.102 | 0.56  | 1.64  | -1.25 | -0.023(.254) | 0.003(.232)  |
| Visual-lhFusiform                       | -34 | -64 | -16 | 0.026 | 0.482 | 2.22  | -0.12 | -0.003(.320) | 0.042(.293)  |
| Visual-lhFusiform                       | -34 | -44 | -22 | 0.137 | 0.584 | 1.49  | -1.46 | -0.038(.236) | -0.013(.246) |
| Visual-lhCuneus                         | -5  | -88 | 19  | 0.914 | 0.983 | -0.11 | -2.56 | 0.028(.285)  | 0.027(.238)  |
| Visual-lhLingual                        | -9  | -78 | -4  | 0.421 | 0.75  | 0.8   | -2.24 | 0.043(.337)  | 0.061(.319)  |
| Visual-lhInferiorOccipital              | -41 | -72 | -6  | 0.816 | 0.958 | 0.23  | -2.53 | -0.031(.234) | -0.028(.229) |
| Visual-lhInferiorOccipital              | -25 | -97 | -8  | 0.244 | 0.666 | 1.17  | -1.88 | -0.061(.461) | -0.025(.440) |
| Visual-lhLingual                        | -23 | -82 | -12 | 0.071 | 0.552 | 1.81  | -0.96 | 0.042(.338)  | 0.080(.306)  |
| Visual-rhSuperiorOccipital              | 22  | -85 | 24  | 0.275 | 0.676 | 1.09  | -1.97 | -0.046(.249) | -0.028(.228) |
| Visual-rhFusiform                       | 22  | -46 | -10 | 0.047 | 0.552 | 1.99  | -0.61 | -0.037(.257) | -0.003(.240) |
| Visual-rhCalcarine                      | 16  | -74 | 9   | 0.146 | 0.584 | 1.46  | -1.53 | 0.009(.349)  | 0.043(.338)  |

|                           |           |            |           |              |              |             |             |                     |                    |
|---------------------------|-----------|------------|-----------|--------------|--------------|-------------|-------------|---------------------|--------------------|
| Visual-rhLingual          | 20        | -45        | -4        | 0.432        | 0.75         | 0.79        | -2.25       | -0.029(.308)        | -0.012(.309)       |
| Visual-rhLingual          | 16        | -60        | -5        | 0.092        | 0.552        | 1.69        | -1.17       | -0.017(.274)        | 0.015(.270)        |
| Visual-rhInferiorParietal | 27        | -55        | 54        | 0.369        | 0.75         | 0.9         | -2.15       | 0.004(.212)         | 0.016(.198)        |
| <b>Visual-rhCuneus</b>    | <b>18</b> | <b>-78</b> | <b>34</b> | <b>0.005</b> | <b>0.431</b> | <b>2.78</b> | <b>1.23</b> | <b>-0.036(.241)</b> | <b>0.006(.220)</b> |
| Visual-rhCuneus           | 8         | -86        | 32        | 0.025        | 0.482        | 2.25        | -0.06       | -0.026(.293)        | 0.017(.267)        |
| Visual-rhMiddleOccipital  | 35        | -77        | 21        | 0.767        | 0.945        | 0.3         | -2.52       | -0.019(.233)        | -0.015(.218)       |
| Visual-rhMiddleOccipital  | 32        | -86        | 2         | 0.084        | 0.552        | 1.73        | -1.08       | 0.040(.260)         | 0.073(.270)        |
| Visual-rhMiddleTemporal   | 44        | -67        | 2         | 0.087        | 0.552        | 1.71        | -1.12       | -0.008(.194)        | 0.014(.187)        |
| Visual-rhInferiorTemporal | 47        | -52        | -12       | 0.149        | 0.584        | 1.44        | -1.52       | 0.012(.205)         | 0.032(.190)        |
| Visual-rhMiddleTemporal   | 49        | -54        | 9         | 0.007        | 0.431        | 2.68        | 0.97        | -0.036(.207)        | 0.000(.194)        |
| Visual-rhFusiform         | 31        | -46        | -6        | 0.854        | 0.969        | 0.18        | -2.54       | -0.030(.291)        | -0.027(.264)       |
| Visual-rhFusiform         | 27        | -69        | -7        | 0.199        | 0.631        | 1.28        | -1.75       | 0.052(.286)         | 0.074(.251)        |
| Visual-rhFusiform         | 35        | -44        | -20       | 0.498        | 0.789        | -0.68       | -2.32       | 0.064(.255)         | 0.052(.250)        |
| Visual-rhCuneus           | 14        | -92        | 15        | 0.729        | 0.933        | 0.35        | -2.5        | -0.035(.296)        | -0.028(.271)       |
| Visual-rhLingual          | 10        | -74        | -2        | 0.727        | 0.933        | -0.35       | -2.5        | 0.054(.325)         | 0.047(.295)        |
| Visual-rhLingual          | 20        | -87        | -7        | 0.086        | 0.552        | 1.72        | -1.12       | 0.112(.374)         | 0.158(.397)        |
| Visual-rhCuneus           | 5         | -80        | 23        | 0.789        | 0.945        | 0.27        | -2.53       | 0.024(.305)         | 0.029(.274)        |
| Visual-rhCuneus           | 15        | -70        | 23        | 0.289        | 0.676        | 1.06        | -2.01       | -0.021(.279)        | -0.002(.254)       |

\* = qFDR < .05. Bold = qFDR < .05 or  $\ln(\text{BF}_{10}) > 1.1$ . Note that x, y and z values here refer to the Montreal Neurological Institute (MNI) coordinates at the centroid of each cortical-surface region-of-interest (ROI) of a standard MNI brain. The label for each cortical-surface ROI is based on the Automated Anatomical Labeling (AAL) algorithm<sup>2</sup> via the mni2aal R package (<https://github.com/yunshiuang/label4MRI>). The label for each subcortical-volumetric ROI is based on Freesurfer's segmentation algorithm<sup>3</sup>, applied on each participant's individual brain space. Given that individual brain space was used for subcortical ROIs, their x, y and z coordinates are not given here. \* = qFDR < .05. Bold = qFDR < .05 or  $\ln(\text{BF}_{10}) > 1.1$ . The value of  $\ln(\text{BF}_{10}) > 1.1$  and  $< -1.2$  are interpreted as substantial evidence for the alternative (of there being a difference), and null hypotheses (of there being *no* difference), respectively.

**eTable 8.** Group differences between children with vs. without anxiety during reward anticipation [Large Reward > Neutral Cue] in the MID task-fMRI activation

| Name: Network-ROI             | x   | y   | z  | <i>p</i> | <i>q</i> <sub>FDR</sub> | <i>t</i> | ln(BF <sub>10</sub> ) | With Anxiety<br><i>M</i> ( <i>SD</i> ) | Without Anxiety<br><i>M</i> ( <i>SD</i> ) |
|-------------------------------|-----|-----|----|----------|-------------------------|----------|-----------------------|----------------------------------------|-------------------------------------------|
| Auditory-lhHeschl             | -32 | -29 | 16 | 0.943    | 0.989                   | -0.07    | -2.09                 | -0.004(.245)                           | -0.006(.238)                              |
| Auditory-lhSupraMarginal      | -46 | -41 | 26 | 0.062    | 0.825                   | -1.87    | -0.41                 | 0.042(.255)                            | -0.013(.258)                              |
| Auditory-lhOpercularRolandic  | -36 | -34 | 20 | 0.662    | 0.974                   | -0.44    | -1.99                 | 0.006(.283)                            | -0.007(.276)                              |
| Auditory-lhSuperiorTemporal   | -53 | -21 | 5  | 0.477    | 0.923                   | -0.71    | -1.84                 | 0.034(.248)                            | 0.018(.203)                               |
| Auditory-lhSuperiorTemporal   | -60 | -38 | 16 | 0.777    | 0.974                   | 0.28     | -2.03                 | -0.011(.212)                           | -0.005(.199)                              |
| Auditory-lhSuperiorTemporal   | -59 | -30 | 11 | 0.74     | 0.974                   | 0.33     | -2.03                 | -0.005(.212)                           | 0.003(.200)                               |
| Auditory-lhSuperiorTemporal   | -41 | -38 | 14 | 0.16     | 0.835                   | -1.41    | -1.12                 | 0.038(.243)                            | -0.001(.240)                              |
| Auditory-lhInsula             | -34 | -22 | 10 | 0.975    | 0.989                   | 0.03     | -2.07                 | -0.008(.207)                           | -0.008(.215)                              |
| Auditory-lhInsula             | -37 | -14 | 19 | 0.628    | 0.974                   | -0.48    | -1.96                 | -0.015(.233)                           | -0.028(.241)                              |
| Auditory-lhOpercularRolandic  | -52 | -14 | 15 | 0.194    | 0.839                   | -1.3     | -1.25                 | 0.016(.274)                            | -0.027(.282)                              |
| Auditory-lhSupraMarginal      | -51 | -22 | 19 | 0.038    | 0.825                   | -2.08    | -0.02                 | 0.037(.241)                            | -0.016(.222)                              |
| Auditory-lhSuperiorTemporal   | -54 | -1  | -1 | 0.244    | 0.854                   | -1.16    | -1.44                 | 0.013(.169)                            | -0.009(.172)                              |
| Auditory-rhInsula             | 34  | -22 | 13 | 0.107    | 0.825                   | -1.61    | -0.84                 | 0.023(.230)                            | -0.017(.216)                              |
| Auditory-rhOpercularRolandic  | 36  | -31 | 19 | 0.202    | 0.846                   | -1.28    | -1.31                 | 0.016(.228)                            | -0.018(.236)                              |
| Auditory-rhSuperiorTemporal   | 54  | -16 | 5  | 0.638    | 0.974                   | -0.47    | -1.98                 | 0.017(.256)                            | 0.006(.209)                               |
| Auditory-rhSuperiorTemporal   | 59  | -39 | 15 | 0.791    | 0.974                   | -0.27    | -2.06                 | 0.007(.209)                            | 0.001(.187)                               |
| Auditory-rhSuperiorTemporal   | 62  | -24 | 1  | 0.761    | 0.974                   | -0.3     | -2.03                 | 0.001(.242)                            | -0.006(.207)                              |
| Auditory-rhSuperiorTemporal   | 60  | -25 | 10 | 0.238    | 0.854                   | -1.18    | -1.41                 | 0.014(.219)                            | -0.012(.193)                              |
| Auditory-rhInsula             | 38  | -12 | 20 | 0.927    | 0.989                   | -0.09    | -2.06                 | -0.042(.282)                           | -0.045(.267)                              |
| Auditory-rhInsula             | 37  | -10 | 12 | 0.966    | 0.989                   | -0.04    | -2.08                 | -0.013(.252)                           | -0.014(.247)                              |
| Auditory-rhOpercularRolandic  | 61  | -2  | 11 | 0.846    | 0.989                   | -0.19    | -2.07                 | -0.009(.285)                           | -0.014(.266)                              |
| Auditory-rhOpercularRolandic  | 54  | -14 | 17 | 0.809    | 0.979                   | 0.24     | -2.06                 | -0.042(.305)                           | -0.036(.244)                              |
| Auditory-rhSuperiorTemporal   | 40  | -22 | 3  | 0.467    | 0.923                   | -0.73    | -1.83                 | 0.006(.381)                            | -0.025(.379)                              |
| Auditory-rhSuperiorTemporal   | 56  | 2   | -2 | 0.723    | 0.974                   | -0.35    | -2                    | 0.002(.158)                            | -0.004(.161)                              |
| CinguloOperc-lhMiddleCingulum | -17 | -36 | 43 | 0.963    | 0.989                   | 0.05     | -2.07                 | -0.010(.196)                           | -0.009(.177)                              |
| CinguloOperc-lhMiddleCingulum | -9  | 0   | 43 | 0.381    | 0.918                   | -0.88    | -1.68                 | 0.059(.178)                            | 0.041(.171)                               |

|                                         |     |     |     |       |       |       |       |              |              |
|-----------------------------------------|-----|-----|-----|-------|-------|-------|-------|--------------|--------------|
| CinguloOperc-lhMiddleCingulum           | -8  | 15  | 34  | 0.344 | 0.913 | -0.95 | -1.64 | 0.061(.201)  | 0.040(.193)  |
| CinguloOperc-lhAnteriorCingulum         | -9  | 25  | 28  | 0.809 | 0.979 | -0.24 | -2.06 | 0.060(.237)  | 0.053(.247)  |
| CinguloOperc-lhSupplementaryMotor       | -8  | -9  | 63  | 0.728 | 0.974 | -0.35 | -2.01 | 0.057(.189)  | 0.050(.162)  |
| CinguloOperc-lhPrecentral               | -42 | -4  | 47  | 0.584 | 0.974 | -0.55 | -1.94 | 0.051(.210)  | 0.038(.208)  |
| CinguloOperc-lhSupraMarginal            | -58 | -41 | 36  | 0.389 | 0.918 | -0.86 | -1.71 | 0.008(.193)  | -0.012(.194) |
| CinguloOperc-lhSuperiorTemporal         | -39 | -16 | -5  | 0.175 | 0.835 | -1.36 | -1.19 | 0.007(.188)  | -0.022(.190) |
| CinguloOperc-lhInsula                   | -39 | -2  | -12 | 0.015 | 0.825 | -2.43 | 0.75  | 0.039(.200)  | -0.012(.184) |
| CinguloOperc-lhInsula                   | -38 | 3   | 12  | 0.214 | 0.854 | -1.24 | -1.33 | 0.052(.167)  | 0.026(.185)  |
| CinguloOperc-lhInsula                   | -37 | 1   | 6   | 0.933 | 0.989 | 0.08  | -2.09 | 0.008(.221)  | 0.010(.196)  |
| CinguloOperc-lhInsula                   | -37 | 9   | -1  | 0.917 | 0.989 | -0.1  | -2.07 | 0.031(.216)  | 0.029(.203)  |
| CinguloOperc-lhInsula                   | -29 | 24  | 8   | 0.144 | 0.831 | -1.46 | -1.05 | 0.119(.199)  | 0.086(.200)  |
| CinguloOperc-lhOpercularRolandic        | -60 | -4  | 9   | 0.159 | 0.835 | 1.41  | -1.13 | -0.067(.306) | -0.023(.271) |
| CinguloOperc-lhSuperiorTemporal         | -55 | -32 | 23  | 0.179 | 0.835 | -1.34 | -1.22 | -0.003(.247) | -0.037(.219) |
| CinguloOperc-lhSupraMarginal            | -59 | -24 | 31  | 0.438 | 0.923 | -0.78 | -1.79 | 0.004(.213)  | -0.013(.191) |
| CinguloOperc-lhOpercularRolandic        | -52 | -1  | 5   | 0.844 | 0.989 | 0.2   | -2.05 | 0.013(.215)  | 0.018(.215)  |
| CinguloOperc-lhOpercularInferiorFrontal | -49 | 8   | 11  | 0.581 | 0.974 | -0.55 | -1.93 | 0.007(.208)  | -0.005(.197) |
| CinguloOperc-lhMiddleFrontal            | -27 | 47  | 21  | 0.089 | 0.825 | -1.7  | -0.69 | 0.056(.261)  | 0.009(.239)  |
| CinguloOperc-lhMiddleFrontal            | -29 | 38  | 28  | 0.613 | 0.974 | 0.51  | -1.93 | -0.008(.209) | 0.005(.210)  |
| CinguloOperc-rhMiddleCingulum           | 16  | -33 | 43  | 0.081 | 0.825 | -1.75 | -0.63 | 0.029(.185)  | -0.005(.173) |
| CinguloOperc-rhSupplementaryMotor       | 7   | 5   | 56  | 0.394 | 0.918 | -0.85 | -1.71 | 0.098(.198)  | 0.078(.197)  |
| CinguloOperc-rhMiddleCingulum           | 9   | 4   | 40  | 0.071 | 0.825 | -1.8  | -0.52 | 0.076(.193)  | 0.040(.175)  |
| CinguloOperc-rhMiddleCingulum           | 9   | 11  | 46  | 0.624 | 0.974 | -0.49 | -1.96 | 0.081(.214)  | 0.069(.209)  |
| CinguloOperc-rhMiddleCingulum           | 6   | 22  | 32  | 0.797 | 0.974 | -0.26 | -2.04 | 0.062(.218)  | 0.056(.202)  |
| CinguloOperc-rhSupplementaryMotor       | 16  | 1   | 68  | 0.546 | 0.971 | 0.6   | -1.9  | 0.023(.159)  | 0.034(.163)  |
| CinguloOperc-rhSupplementaryMotor       | 8   | -6  | 64  | 0.942 | 0.989 | -0.07 | -2.06 | 0.055(.180)  | 0.054(.163)  |
| CinguloOperc-rhPrecentral               | 42  | -2  | 47  | 0.898 | 0.989 | -0.13 | -2.05 | 0.046(.180)  | 0.043(.196)  |
| CinguloOperc-rhSupraMarginal            | 58  | -40 | 35  | 0.678 | 0.974 | -0.42 | -2    | 0.024(.182)  | 0.015(.177)  |
| CinguloOperc-rhSupraMarginal            | 55  | -27 | 30  | 0.051 | 0.825 | -1.96 | -0.26 | 0.013(.194)  | -0.027(.178) |
| CinguloOperc-rhInsula                   | 39  | -14 | -5  | 0.033 | 0.825 | -2.13 | 0.09  | 0.028(.171)  | -0.019(.193) |
| CinguloOperc-rhInsula                   | 40  | 1   | -13 | 0.6   | 0.974 | -0.52 | -1.96 | 0.007(.215)  | -0.005(.209) |

|                                  |     |     |     |       |       |       |       |              |              |
|----------------------------------|-----|-----|-----|-------|-------|-------|-------|--------------|--------------|
| CinguloOperc-rhInsula            | 37  | 5   | 13  | 0.287 | 0.854 | -1.07 | -1.54 | 0.049(.204)  | 0.024(.203)  |
| CinguloOperc-rhInsula            | 40  | 10  | -2  | 0.418 | 0.923 | -0.81 | -1.77 | 0.063(.168)  | 0.045(.186)  |
| CinguloOperc-rhInsula            | 36  | 6   | 6   | 0.685 | 0.974 | -0.41 | -2.01 | 0.033(.190)  | 0.025(.189)  |
| CinguloOperc-rhInsula            | 34  | 23  | 4   | 0.361 | 0.918 | -0.91 | -1.7  | 0.171(.273)  | 0.145(.248)  |
| CinguloOperc-rhInsula            | 34  | 24  | 10  | 0.276 | 0.854 | -1.09 | -1.51 | 0.121(.231)  | 0.094(.217)  |
| CinguloOperc-rhOpercularRolandic | 50  | 3   | 4   | 0.656 | 0.974 | 0.45  | -1.98 | 0.017(.178)  | 0.027(.191)  |
| CinguloOperc-rhSuperiorFrontal   | 24  | 51  | 24  | 0.873 | 0.989 | -0.16 | -2.06 | 0.002(.244)  | -0.003(.229) |
| CinguloOperc-rhMiddleFrontal     | 31  | 40  | 26  | 0.433 | 0.923 | -0.78 | -1.8  | 0.039(.258)  | 0.020(.208)  |
| CinguloParietal-lhMiddleCingulum | -6  | -26 | 28  | 0.099 | 0.825 | -1.65 | -0.78 | 0.084(.285)  | 0.035(.259)  |
| CinguloParietal-lhPrecuneus      | -13 | -65 | 32  | 0.075 | 0.825 | -1.78 | -0.57 | 0.037(.268)  | -0.013(.247) |
| CinguloParietal-lhPrecuneus      | -11 | -73 | 43  | 0.759 | 0.974 | -0.31 | -2.02 | 0.018(.239)  | 0.010(.238)  |
| CinguloParietal-rhMiddleCingulum | 8   | -27 | 28  | 0.402 | 0.923 | -0.84 | -1.74 | 0.065(.272)  | 0.040(.264)  |
| CinguloParietal-rhCuneus         | 16  | -70 | 40  | 0.8   | 0.974 | 0.25  | -2.05 | 0.015(.272)  | 0.021(.223)  |
| Default-lhPrecuneus              | -11 | -52 | 36  | 0.525 | 0.958 | -0.64 | -1.87 | 0.015(.202)  | 0.000(.201)  |
| Default-lhSuperiorFrontal        | -12 | 27  | 57  | 0.353 | 0.913 | -0.93 | -1.65 | 0.004(.158)  | -0.012(.152) |
| Default-lhAngular                | -47 | -58 | 31  | 0.195 | 0.839 | -1.3  | -1.27 | 0.019(.191)  | -0.008(.183) |
| Default-lhMedialSuperiorFrontal  | -6  | 42  | 35  | 0.855 | 0.989 | -0.18 | -2.06 | 0.010(.213)  | 0.006(.190)  |
| Default-lhMiddleCingulum         | -2  | -18 | 39  | 0.476 | 0.923 | -0.71 | -1.83 | 0.024(.248)  | 0.006(.212)  |
| Default-lhSuperiorFrontal        | -20 | 30  | 46  | 0.362 | 0.918 | -0.91 | -1.68 | 0.030(.165)  | 0.013(.164)  |
| Default-lhMiddleOccipital        | -39 | -74 | 38  | 0.37  | 0.918 | -0.9  | -1.69 | 0.028(.209)  | 0.008(.197)  |
| Default-lhOrbitalSuperiorFrontal | -28 | 54  | 0   | 0.198 | 0.839 | -1.29 | -1.28 | 0.089(.369)  | 0.040(.331)  |
| Default-lhOrbitalMedialFrontal   | -6  | 55  | -11 | 0.239 | 0.854 | -1.18 | -1.42 | 0.005(.387)  | -0.046(.387) |
| Default-lhOrbitalMedialFrontal   | -7  | 38  | -9  | 0.181 | 0.835 | -1.34 | -1.22 | 0.064(.328)  | 0.013(.340)  |
| Default-lhMiddleTemporal         | -63 | -29 | -7  | 0.795 | 0.974 | -0.26 | -2    | 0.018(.315)  | 0.010(.275)  |
| Default-lhMiddleTemporal         | -53 | -11 | -16 | 0.568 | 0.974 | -0.57 | -1.92 | -0.021(.219) | -0.035(.221) |
| Default-lhSuperiorFrontal        | -16 | 49  | 37  | 0.433 | 0.923 | -0.78 | -1.77 | 0.007(.197)  | -0.010(.192) |
| Default-lhSuperiorFrontal        | -20 | 56  | 28  | 0.298 | 0.854 | -1.04 | -1.54 | 0.005(.217)  | -0.020(.206) |
| Default-lhMedialSuperiorFrontal  | -6  | 55  | 18  | 0.339 | 0.913 | -0.96 | -1.63 | 0.015(.224)  | -0.007(.203) |
| Default-lhSuperiorFrontal        | -16 | 65  | 14  | 0.022 | 0.825 | -2.3  | 0.45  | 0.085(.351)  | 0.006(.301)  |
| Default-lhAnteriorCingulum       | -6  | 45  | 6   | 0.6   | 0.974 | -0.52 | -1.94 | 0.058(.241)  | 0.045(.218)  |
| Default-lhMiddleFrontal          | -26 | 27  | 39  | 0.276 | 0.854 | -1.09 | -1.51 | 0.028(.206)  | 0.002(.205)  |
| Default-lhMiddleFrontal          | -29 | 17  | 51  | 0.028 | 0.825 | -2.19 | 0.23  | 0.086(.207)  | 0.038(.188)  |
| Default-lhMiddleFrontal          | -42 | 16  | 48  | 0.014 | 0.825 | -2.47 | 0.86  | 0.058(.170)  | 0.005(.182)  |
| Default-rhPrecuneus              | 12  | -52 | 34  | 0.306 | 0.861 | -1.02 | -1.57 | 0.016(.196)  | -0.006(.192) |
| Default-rhSupplementaryMotor     | 12  | 22  | 60  | 0.281 | 0.854 | -1.08 | -1.5  | -0.004(.145) | -0.022(.144) |
| Default-rhAnteriorCingulum       | 8   | 44  | 6   | 0.275 | 0.854 | -1.09 | -1.51 | 0.077(.216)  | 0.051(.213)  |

|                                        |     |     |     |       |       |       |       |              |              |
|----------------------------------------|-----|-----|-----|-------|-------|-------|-------|--------------|--------------|
| Default-rhMiddleCingulum               | 3   | -20 | 38  | 0.506 | 0.948 | -0.66 | -1.87 | 0.014(.255)  | -0.004(.226) |
| Default-rhSuperiorFrontal              | 22  | 21  | 46  | 0.718 | 0.974 | -0.36 | -2.02 | 0.017(.177)  | 0.010(.171)  |
| Default-rhAngular                      | 49  | -53 | 29  | 0.034 | 0.825 | -2.12 | 0.06  | 0.026(.189)  | -0.019(.186) |
| Default-rhMiddleTemporal               | 62  | -26 | -6  | 0.284 | 0.854 | -1.07 | -1.53 | 0.026(.240)  | -0.003(.237) |
| Default-rhPrecuneus                    | 7   | -69 | 50  | 0.629 | 0.974 | -0.48 | -1.95 | 0.059(.252)  | 0.044(.268)  |
| Default-rhAngular                      | 46  | -67 | 36  | 0.607 | 0.974 | -0.51 | -1.94 | 0.022(.174)  | 0.011(.188)  |
| Default-rhOrbitalMedialFrontal         | 5   | 65  | -7  | 0.106 | 0.825 | -1.62 | -0.81 | 0.056(.393)  | -0.023(.425) |
| Default-rhOrbitalMedialFrontal         | 7   | 48  | -10 | 0.947 | 0.989 | -0.07 | -2.08 | -0.050(.330) | -0.052(.375) |
| Default-rhMiddleTemporal               | 58  | -7  | -16 | 0.64  | 0.974 | -0.47 | -1.98 | -0.017(.224) | -0.029(.220) |
| Default-rhMiddleFrontal                | 21  | 33  | 42  | 0.545 | 0.971 | -0.61 | -1.9  | 0.009(.180)  | -0.003(.178) |
| Default-rhSuperiorFrontal              | 21  | 43  | 35  | 0.713 | 0.974 | 0.37  | -2.02 | -0.009(.206) | -0.001(.197) |
| Default-rhSuperiorFrontal              | 16  | 61  | 20  | 0.967 | 0.989 | -0.04 | -2.07 | -0.017(.253) | -0.018(.245) |
| Default-rhMedialSuperiorFrontal        | 8   | 54  | 14  | 0.757 | 0.974 | 0.31  | -2.02 | -0.020(.224) | -0.013(.206) |
| Default-rhMedialSuperiorFrontal        | 6   | 55  | 29  | 0.443 | 0.923 | -0.77 | -1.79 | -0.018(.234) | -0.037(.216) |
| Default-rhSuperiorFrontal              | 14  | 47  | 42  | 0.215 | 0.854 | -1.24 | -1.33 | 0.005(.191)  | -0.021(.183) |
| Default-rhMedialSuperiorFrontal        | 7   | 44  | 35  | 0.466 | 0.923 | -0.73 | -1.8  | 0.027(.195)  | 0.011(.183)  |
| Default-rhMiddleFrontal                | 31  | 19  | 49  | 0.225 | 0.854 | -1.21 | -1.36 | 0.059(.217)  | 0.031(.201)  |
| Default-rhSuperiorTemporal             | 54  | 1   | -13 | 0.962 | 0.989 | -0.05 | -2.07 | -0.014(.198) | -0.015(.221) |
| DorsalAttn-lhPrecentral                | -27 | -7  | 46  | 0.297 | 0.854 | -1.04 | -1.55 | 0.049(.193)  | 0.027(.178)  |
| DorsalAttn-lhMiddleFrontal             | -27 | 2   | 53  | 0.279 | 0.854 | -1.08 | -1.52 | 0.045(.198)  | 0.024(.170)  |
| DorsalAttn-lhSuperiorFrontal           | -20 | 6   | 56  | 0.045 | 0.825 | -2.01 | -0.14 | 0.060(.192)  | 0.019(.182)  |
| DorsalAttn-lhSuperiorFrontal           | -21 | 0   | 63  | 0.132 | 0.83  | -1.51 | -0.99 | 0.045(.174)  | 0.019(.154)  |
| DorsalAttn-lhInferiorParietal          | -31 | -49 | 47  | 0.14  | 0.831 | -1.47 | -1.04 | 0.068(.206)  | 0.035(.195)  |
| DorsalAttn-lhInferiorParietal          | -43 | -45 | 43  | 0.475 | 0.923 | -0.72 | -1.83 | 0.103(.204)  | 0.086(.197)  |
| DorsalAttn-lhInferiorParietal          | -52 | -31 | 40  | 0.347 | 0.913 | -0.94 | -1.65 | 0.041(.196)  | 0.021(.189)  |
| DorsalAttn-lhTriangularInferiorFrontal | -44 | 36  | 8   | 0.346 | 0.913 | -0.94 | -1.65 | -0.006(.264) | -0.034(.259) |
| DorsalAttn-lhSuperiorParietal          | -20 | -65 | 51  | 0.576 | 0.974 | -0.56 | -1.92 | 0.020(.215)  | 0.007(.203)  |
| DorsalAttn-lhMiddleOccipital           | -26 | -65 | 32  | 0.458 | 0.923 | -0.74 | -1.82 | 0.062(.247)  | 0.044(.218)  |
| DorsalAttn-lhPrecuneus                 | -10 | -57 | 60  | 0.101 | 0.825 | -1.64 | -0.79 | 0.034(.202)  | -0.001(.184) |
| DorsalAttn-lhPrecuneus                 | -7  | -64 | 55  | 0.964 | 0.989 | 0.05  | -2.07 | 0.025(.242)  | 0.026(.238)  |
| DorsalAttn-lhMiddleOccipital           | -30 | -74 | 36  | 0.824 | 0.987 | 0.22  | -2.05 | 0.042(.234)  | 0.048(.228)  |
| DorsalAttn-lhInferiorTemporal          | -46 | -58 | -8  | 0.882 | 0.989 | -0.15 | -2.04 | 0.000(.181)  | -0.003(.180) |
| DorsalAttn-lhPrecentral                | -45 | 3   | 32  | 0.244 | 0.854 | -1.17 | -1.42 | 0.063(.204)  | 0.035(.210)  |
| DorsalAttn-lhPrecentral                | -35 | 6   | 34  | 0.407 | 0.923 | -0.83 | -1.76 | 0.054(.286)  | 0.028(.275)  |

|                                            |     |     |    |       |       |       |       |             |              |
|--------------------------------------------|-----|-----|----|-------|-------|-------|-------|-------------|--------------|
| DorsalAttn-lhMiddleFrontal                 | -38 | 38  | 17 | 0.852 | 0.989 | -0.19 | -2.06 | 0.043(.245) | 0.038(.241)  |
| DorsalAttn-lhOpercularInferiorFrontal      | -42 | 9   | 22 | 0.054 | 0.825 | -1.92 | -0.3  | 0.071(.239) | 0.016(.248)  |
| DorsalAttn-lhMiddleFrontal                 | -36 | 33  | 32 | 0.297 | 0.854 | -1.04 | -1.56 | 0.046(.246) | 0.022(.205)  |
| DorsalAttn-rhPrecuneus                     | 10  | -57 | 58 | 0.394 | 0.918 | -0.85 | -1.68 | 0.028(.172) | 0.009(.187)  |
| DorsalAttn-rhMiddleFrontal                 | 29  | 2   | 52 | 0.082 | 0.825 | -1.74 | -0.62 | 0.064(.181) | 0.031(.168)  |
| DorsalAttn-rhPrecentral                    | 30  | -8  | 47 | 0.916 | 0.989 | 0.11  | -2.07 | 0.032(.195) | 0.034(.191)  |
| DorsalAttn-rhSuperiorFrontal               | 23  | 6   | 58 | 0.189 | 0.839 | -1.31 | -1.23 | 0.060(.172) | 0.034(.169)  |
| DorsalAttn-rhInferiorParietal              | 39  | -43 | 40 | 0.723 | 0.974 | -0.35 | -2.02 | 0.101(.222) | 0.093(.213)  |
| DorsalAttn-rhMiddleFrontal                 | 37  | 38  | 13 | 0.669 | 0.974 | -0.43 | -1.98 | 0.071(.249) | 0.060(.228)  |
| DorsalAttn-rhTriangularInferiorFrontal     | 48  | 38  | 2  | 0.012 | 0.825 | -2.5  | 0.91  | 0.032(.312) | -0.051(.291) |
| DorsalAttn-rhSuperiorParietal              | 23  | -66 | 52 | 0.235 | 0.854 | -1.19 | -1.4  | 0.041(.228) | 0.013(.203)  |
| DorsalAttn-rhMiddleOccipital               | 32  | -64 | 34 | 0.832 | 0.989 | -0.21 | -2.06 | 0.071(.217) | 0.066(.216)  |
| DorsalAttn-rhInferiorParietal              | 34  | -48 | 49 | 0.423 | 0.923 | -0.8  | -1.77 | 0.079(.216) | 0.061(.199)  |
| DorsalAttn-rhMiddleTemporal                | 57  | -54 | -1 | 0.025 | 0.825 | -2.25 | 0.33  | 0.063(.226) | 0.009(.213)  |
| DorsalAttn-rhPrecentral                    | 47  | 2   | 38 | 0.539 | 0.968 | -0.61 | -1.89 | 0.082(.217) | 0.066(.224)  |
| DorsalAttn-rhOpercularInferiorFrontal      | 47  | 8   | 19 | 0.126 | 0.83  | -1.53 | -0.97 | 0.078(.211) | 0.044(.192)  |
| FrontoParietal-lhMiddleFrontal             | -38 | 49  | 10 | 0.625 | 0.974 | -0.49 | -1.96 | 0.056(.289) | 0.040(.274)  |
| FrontoParietal-lhInferiorTemporal          | -56 | -48 | -9 | 0.04  | 0.825 | -2.06 | -0.03 | 0.098(.257) | 0.042(.232)  |
| FrontoParietal-lhMedialSuperiorFrontal     | -6  | 29  | 44 | 0.379 | 0.918 | -0.88 | -1.69 | 0.042(.181) | 0.024(.176)  |
| FrontoParietal-lhOrbitalMiddleFrontal      | -40 | 50  | -5 | 0.275 | 0.854 | -1.09 | -1.49 | 0.049(.330) | 0.006(.337)  |
| FrontoParietal-lhAngular                   | -34 | -61 | 42 | 0.754 | 0.974 | -0.31 | -2.04 | 0.098(.247) | 0.090(.224)  |
| FrontoParietal-lhOpercularInferiorFrontal  | -43 | 19  | 34 | 0.096 | 0.825 | -1.67 | -0.75 | 0.074(.269) | 0.026(.254)  |
| FrontoParietal-lhTriangularInferiorFrontal | -40 | 24  | 23 | 0.023 | 0.825 | -2.27 | 0.39  | 0.067(.264) | 0.005(.240)  |
| FrontoParietal-lhSuperiorFrontal           | -21 | 63  | 2  | 0.409 | 0.923 | -0.83 | -1.71 | 0.071(.264) | 0.041(.310)  |
| FrontoParietal-lhMiddleFrontal             | -29 | 51  | 10 | 0.11  | 0.825 | -1.6  | -0.86 | 0.098(.317) | 0.047(.279)  |
| FrontoParietal-rhSupraMarginal             | 48  | -42 | 42 | 0.132 | 0.83  | -1.51 | -1.01 | 0.133(.212) | 0.098(.203)  |
| FrontoParietal-rhMiddleFrontal             | 38  | 46  | 8  | 0.084 | 0.825 | -1.73 | -0.66 | 0.102(.287) | 0.051(.261)  |

|                                                |            |            |            |              |              |              |             |                    |                    |
|------------------------------------------------|------------|------------|------------|--------------|--------------|--------------|-------------|--------------------|--------------------|
| FrontoParietal-rhInferiorTemporal              | 60         | -41        | -11        | 0.113        | 0.827        | -1.58        | -0.88       | 0.095(.243)        | 0.051(.245)        |
| FrontoParietal-rhSupplementaryMotor            | 7          | 26         | 47         | 0.464        | 0.923        | -0.73        | -1.82       | 0.083(.220)        | 0.067(.182)        |
| <b>FrontoParietal-rhOrbitalInferiorFrontal</b> | <b>43</b>  | <b>48</b>  | <b>-5</b>  | <b>0.008</b> | <b>0.825</b> | <b>-2.64</b> | <b>1.27</b> | <b>0.122(.327)</b> | <b>0.026(.309)</b> |
| FrontoParietal-rhInferiorParietal              | 42         | -54        | 44         | 0.35         | 0.913        | -0.93        | -1.66       | 0.111(.222)        | 0.086(.233)        |
| FrontoParietal-rhAngular                       | 36         | -57        | 45         | 0.21         | 0.854        | -1.25        | -1.32       | 0.135(.250)        | 0.098(.256)        |
| FrontoParietal-rhMiddleFrontal                 | 38         | 29         | 36         | 0.972        | 0.989        | 0.04         | -2.06       | 0.038(.216)        | 0.039(.209)        |
| FrontoParietal-rhTriangularInferiorFrontal     | 42         | 29         | 22         | 0.183        | 0.835        | -1.33        | -1.23       | 0.094(.259)        | 0.057(.247)        |
| FrontoParietal-rhTriangularInferiorFrontal     | 39         | 19         | 26         | 0.597        | 0.974        | -0.53        | -1.95       | 0.027(.298)        | 0.011(.260)        |
| FrontoParietal-rhOrbitalSuperiorFrontal        | 28         | 57         | -5         | 0.296        | 0.854        | -1.05        | -1.56       | 0.080(.374)        | 0.038(.352)        |
| FrontoParietal-rhSuperiorFrontal               | 24         | 59         | 5          | 0.095        | 0.825        | -1.67        | -0.73       | 0.094(.282)        | 0.038(.285)        |
| FrontoParietal-rhSuperiorFrontal               | 31         | 52         | 10         | 0.906        | 0.989        | -0.12        | -2.06       | 0.057(.316)        | 0.054(.284)        |
| FrontoParietal-rhMiddleFrontal                 | 42         | 20         | 48         | 0.168        | 0.835        | -1.38        | -1.15       | 0.053(.182)        | 0.024(.177)        |
| FrontoParietal-rhMiddleFrontal                 | 39         | 10         | 43         | 0.455        | 0.923        | -0.75        | -1.82       | 0.030(.212)        | 0.012(.217)        |
| None-lhSuperiorPoleTemporal                    | -29        | 5          | -27        | 0.138        | 0.831        | -1.48        | -1.03       | 0.026(.264)        | -0.020(.272)       |
| None-lhParaHippocampal                         | -29        | -36        | -8         | 0.713        | 0.974        | -0.37        | -2.02       | 0.028(.182)        | 0.020(.184)        |
| None-lhLingual                                 | -18        | -39        | -1         | 0.251        | 0.854        | -1.15        | -1.45       | 0.049(.224)        | 0.019(.233)        |
| None-lhMiddlePoleTemporal                      | -34        | 17         | -32        | 0.868        | 0.989        | 0.17         | -2.04       | -0.032(.203)       | -0.028(.214)       |
| None-lhOrbitalSuperiorFrontal                  | -23        | 61         | -7         | 0.839        | 0.989        | 0.2          | -2.03       | 0.027(.448)        | 0.039(.497)        |
| None-lhAmygdala                                | -32        | 3          | -17        | 0.639        | 0.974        | 0.47         | -1.98       | -0.008(.376)       | 0.011(.360)        |
| None-lhOrbitalInferiorFrontal                  | -35        | 36         | -10        | 0.967        | 0.989        | -0.04        | -2.08       | -0.083(.339)       | -0.085(.321)       |
| None-lhOrbitalMiddleFrontal                    | -22        | 32         | -14        | 0.077        | 0.825        | -1.77        | -0.57       | 0.048(.259)        | -0.005(.264)       |
| None-lhOrbitalSuperiorFrontal                  | -24        | 52         | -13        | 0.796        | 0.974        | -0.26        | -2.03       | 0.076(.382)        | 0.064(.413)        |
| None-lhOrbitalSuperiorFrontal                  | -17        | 47         | -18        | 0.707        | 0.974        | 0.38         | -2          | 0.026(.480)        | 0.047(.505)        |
| None-lhOrbitalSuperiorFrontal                  | -13        | 24         | -16        | 0.534        | 0.964        | -0.62        | -1.89       | 0.056(.442)        | 0.021(.491)        |
| None-lhRectus                                  | -9         | 46         | -21        | 0.786        | 0.974        | 0.27         | -2.02       | -0.099(1.127)      | -0.059(1.279)      |
| None-lhRectus                                  | -2         | 34         | -26        | 0.32         | 0.888        | 0.99         | -1.61       | -0.258(1.391)      | -0.089(1.496)      |
| None-lhInferiorTemporal                        | -53        | -13        | -29        | 0.456        | 0.923        | -0.74        | -1.8        | 0.015(.470)        | -0.029(.506)       |
| None-lhInferiorTemporal                        | -45        | 9          | -37        | 0.494        | 0.935        | -0.68        | -1.84       | -0.036(.205)       | -0.052(.196)       |
| <b>None-lhInferiorTemporal</b>                 | <b>-55</b> | <b>-40</b> | <b>-16</b> | <b>0.01</b>  | <b>0.825</b> | <b>-2.58</b> | <b>1.12</b> | <b>0.152(.327)</b> | <b>0.056(.319)</b> |
| None-lhFusiform                                | -32        | -4         | -45        | 0.959        | 0.989        | -0.05        | -2.07       | -0.075(.401)       | -0.077(.414)       |
| None-lhInferiorTemporal                        | -39        | -13        | -27        | 0.798        | 0.974        | 0.26         | -2.02       | -0.057(.234)       | -0.049(.264)       |

|                                   |     |     |     |       |       |       |       |              |               |
|-----------------------------------|-----|-----|-----|-------|-------|-------|-------|--------------|---------------|
| None-lhParaHippocampal            | -20 | -13 | -24 | 0.626 | 0.974 | -0.49 | -1.95 | 0.015(.280)  | -0.001(.284)  |
| None-lhParaHippocampal            | -22 | -22 | -17 | 0.236 | 0.854 | 1.19  | -1.42 | -0.049(.285) | -0.012(.279)  |
| None-lhSuperiorPoleTemporal       | -51 | 7   | -20 | 0.122 | 0.83  | -1.55 | -0.93 | -0.022(.182) | -0.054(.184)  |
| None-rhSuperiorPoleTemporal       | 32  | 14  | -30 | 0.663 | 0.974 | -0.44 | -1.97 | 0.005(.255)  | -0.007(.235)  |
| None-rhParaHippocampal            | 25  | -36 | -5  | 0.973 | 0.989 | 0.03  | -2.09 | 0.033(.203)  | 0.034(.206)   |
| None-rhParaHippocampal            | 19  | -30 | -10 | 0.489 | 0.933 | -0.69 | -1.83 | 0.010(.353)  | -0.019(.364)  |
| None-rhRectus                     | 3   | 19  | -23 | 0.362 | 0.918 | -0.91 | -1.67 | 0.075(.738)  | -0.001(.725)  |
| None-rhOrbitalInferiorFrontal     | 35  | 37  | -8  | 0.296 | 0.854 | -1.05 | -1.55 | -0.035(.310) | -0.068(.270)  |
| None-rhOlfactory                  | 25  | 9   | -16 | 0.571 | 0.974 | -0.57 | -1.91 | 0.042(.285)  | 0.020(.335)   |
| None-rhOrbitalSuperiorFrontal     | 21  | 30  | -15 | 0.17  | 0.835 | -1.37 | -1.19 | 0.046(.261)  | 0.004(.274)   |
| None-rhOrbitalSuperiorFrontal     | 22  | 51  | -14 | 0.079 | 0.825 | -1.76 | -0.59 | 0.148(.419)  | 0.062(.423)   |
| None-rhOrbitalSuperiorFrontal     | 12  | 26  | -25 | 0.383 | 0.918 | -0.87 | -1.73 | 0.167(1.072) | 0.049(1.214)  |
| None-rhRectus                     | 14  | 20  | -15 | 0.29  | 0.854 | -1.06 | -1.55 | 0.111(.358)  | 0.066(.382)   |
| None-rhRectus                     | 11  | 39  | -20 | 0.812 | 0.979 | 0.24  | -2.06 | -0.036(.779) | -0.014(.821)  |
| None-lhRectus                     | 2   | 39  | -26 | 0.173 | 0.835 | -1.36 | -1.2  | 0.024(1.343) | -0.193(1.415) |
| None-rhInferiorTemporal           | 62  | -26 | -16 | 0.985 | 0.993 | -0.02 | -2.07 | 0.064(.361)  | 0.063(.387)   |
| None-rhInferiorTemporal           | 55  | -8  | -27 | 0.18  | 0.835 | -1.34 | -1.2  | 0.011(.427)  | -0.048(.376)  |
| None-rhMiddlePoleTemporal         | 45  | 14  | -30 | 0.397 | 0.918 | -0.85 | -1.72 | -0.017(.169) | -0.034(.175)  |
| None-rhParaHippocampal            | 20  | -21 | -22 | 0.079 | 0.825 | -1.76 | -0.59 | 0.051(.309)  | -0.009(.298)  |
| None-rhFusiform                   | 28  | 0   | -37 | 0.453 | 0.923 | -0.75 | -1.81 | 0.065(.531)  | 0.020(.533)   |
| None-rhInferiorTemporal           | 37  | 8   | -38 | 0.319 | 0.888 | -1    | -1.6  | 0.002(.281)  | -0.028(.260)  |
| None-rhInferiorTemporal           | 54  | -10 | -37 | 0.47  | 0.923 | -0.72 | -1.8  | 0.012(.489)  | -0.025(.439)  |
| None-rhInferiorTemporal           | 56  | -27 | -19 | 0.35  | 0.913 | 0.93  | -1.64 | -0.015(.518) | 0.057(.668)   |
| None-rhFusiform                   | 31  | 2   | -46 | 0.155 | 0.835 | -1.42 | -1.1  | 0.082(.513)  | -0.001(.504)  |
| None-rhFusiform                   | 40  | -12 | -30 | 0.446 | 0.923 | -0.76 | -1.78 | 0.019(.264)  | -0.007(.295)  |
| None-rhFusiform                   | 32  | -9  | -36 | 0.585 | 0.974 | -0.55 | -1.9  | 0.031(.388)  | 0.006(.390)   |
| None-rhInferiorTemporal           | 43  | -24 | -21 | 0.961 | 0.989 | 0.05  | -2.03 | -0.011(.348) | -0.008(.358)  |
| None-rhParaHippocampal            | 20  | -11 | -25 | 0.785 | 0.974 | -0.27 | -2.02 | -0.008(.264) | -0.017(.272)  |
| None-rhParaHippocampal            | 30  | -19 | -19 | 0.787 | 0.974 | 0.27  | -2.04 | -0.014(.285) | -0.005(.293)  |
| RetrosplenialTemporal-lhCalcarine | -14 | -58 | 18  | 0.29  | 0.854 | -1.06 | -1.53 | -0.046(.231) | -0.073(.226)  |
| RetrosplenialTemporal-lhLingual   | -9  | -50 | 4   | 0.908 | 0.989 | -0.12 | -2.05 | -0.058(.292) | -0.061(.262)  |
| RetrosplenialTemporal-lhFusiform  | -34 | -33 | -15 | 0.444 | 0.923 | 0.77  | -1.8  | -0.060(.218) | -0.044(.186)  |
| RetrosplenialTemporal-lhFusiform  | -22 | -37 | -15 | 0.613 | 0.974 | 0.51  | -1.96 | -0.055(.259) | -0.043(.215)  |
| RetrosplenialTemporal-rhCalcarine | 14  | -54 | 11  | 0.98  | 0.991 | 0.03  | -2.06 | -0.072(.253) | -0.071(.225)  |
| RetrosplenialTemporal-rhFusiform  | 35  | -36 | -12 | 0.703 | 0.974 | -0.38 | -2.01 | -0.043(.244) | -0.053(.229)  |
| RetrosplenialTemporal-rhFusiform  | 35  | -24 | -20 | 0.019 | 0.825 | 2.36  | 0.57  | -0.078(.220) | -0.020(.219)  |

|                                      |     |     |     |       |       |       |       |              |              |
|--------------------------------------|-----|-----|-----|-------|-------|-------|-------|--------------|--------------|
| RetrosplenialTemporal-<br>rhFusiform | 24  | -36 | -13 | 0.346 | 0.913 | -0.94 | -1.63 | -0.025(.249) | -0.050(.227) |
| Saliency-<br>lhAnteriorCingulum      | -10 | 34  | 22  | 0.688 | 0.974 | -0.4  | -2    | 0.078(.241)  | 0.068(.222)  |
| Saliency-lhInsula                    | -32 | 17  | -8  | 0.947 | 0.989 | -0.07 | -2.08 | 0.105(.222)  | 0.103(.267)  |
| Saliency-<br>rhAnteriorCingulum      | 8   | 35  | 23  | 0.672 | 0.974 | -0.42 | -1.99 | 0.088(.239)  | 0.077(.233)  |
| Saliency-rhInsula                    | 31  | 23  | -5  | 0.789 | 0.974 | -0.27 | -2.05 | 0.144(.276)  | 0.136(.272)  |
| SMhand-<br>lhSuperiorParietal        | -19 | -49 | 65  | 0.181 | 0.835 | -1.34 | -1.21 | 0.010(.190)  | -0.016(.167) |
| SMhand-lhPrecuneus                   | -11 | -48 | 60  | 0.588 | 0.974 | -0.54 | -1.94 | 0.006(.208)  | -0.007(.216) |
| SMhand-<br>lhLobuleParacentral       | -16 | -33 | 66  | 0.947 | 0.989 | -0.07 | -2.07 | 0.027(.275)  | 0.025(.260)  |
| SMhand-<br>lhLobuleParacentral       | -11 | -29 | 70  | 0.404 | 0.923 | -0.83 | -1.73 | 0.034(.174)  | 0.017(.173)  |
| SMhand-<br>lhLobuleParacentral       | -7  | -20 | 74  | 0.792 | 0.974 | 0.26  | -2.01 | -0.007(.227) | -0.001(.212) |
| SMhand-lhPrecuneus                   | -11 | -41 | 65  | 0.843 | 0.989 | -0.2  | -2.05 | -0.012(.207) | -0.017(.185) |
| SMhand-<br>lhLobuleParacentral       | -5  | -28 | 60  | 0.619 | 0.974 | -0.5  | -1.97 | 0.002(.198)  | -0.008(.179) |
| SMhand-<br>lhMiddleCingulum          | -5  | -16 | 49  | 0.884 | 0.989 | -0.15 | -2.05 | 0.026(.200)  | 0.023(.202)  |
| SMhand-lhPostcentral                 | -36 | -30 | 54  | 0.196 | 0.839 | -1.29 | -1.26 | 0.102(.281)  | 0.062(.269)  |
| SMhand-lhPrecentral                  | -37 | -23 | 62  | 0.194 | 0.839 | -1.3  | -1.26 | 0.079(.196)  | 0.052(.180)  |
| SMhand-lhPrecentral                  | -20 | -25 | 64  | 0.916 | 0.989 | -0.11 | -2.05 | 0.018(.182)  | 0.016(.182)  |
| SMhand-lhPrecentral                  | -23 | -14 | 64  | 0.375 | 0.918 | -0.89 | -1.7  | 0.057(.185)  | 0.040(.162)  |
| SMhand-<br>lhLobuleParacentral       | -17 | -9  | 68  | 0.612 | 0.974 | -0.51 | -1.96 | 0.040(.169)  | 0.031(.145)  |
| SMhand-<br>lhSuperiorParietal        | -29 | -45 | 62  | 0.521 | 0.956 | -0.64 | -1.86 | 0.011(.195)  | -0.003(.180) |
| SMhand-lhInferiorParietal            | -54 | -21 | 41  | 0.075 | 0.825 | -1.78 | -0.57 | 0.052(.222)  | 0.011(.206)  |
| SMhand-lhPostcentral                 | -35 | -35 | 42  | 0.231 | 0.854 | -1.2  | -1.39 | 0.042(.211)  | 0.015(.198)  |
| SMhand-lhPostcentral                 | -28 | -37 | 61  | 0.927 | 0.989 | -0.09 | -2.08 | 0.000(.197)  | -0.001(.166) |
| SMhand-lhPostcentral                 | -47 | -31 | 55  | 0.136 | 0.831 | -1.49 | -1    | 0.072(.224)  | 0.036(.206)  |
| SMhand-<br>rhSuperiorParietal        | 21  | -48 | 66  | 0.237 | 0.854 | -1.18 | -1.41 | -0.000(.186) | -0.023(.168) |
| SMhand-rhPostcentral                 | 16  | -33 | 68  | 0.709 | 0.974 | -0.37 | -2    | 0.018(.258)  | 0.007(.256)  |
| SMhand-<br>rhLobuleParacentral       | 5   | -27 | 65  | 0.69  | 0.974 | -0.4  | -2    | -0.007(.207) | -0.015(.180) |
| SMhand-rhPostcentral                 | 12  | -41 | 67  | 0.375 | 0.918 | -0.89 | -1.69 | 0.003(.214)  | -0.015(.180) |
| SMhand-<br>rhSupplementaryMotor      | 5   | -17 | 52  | 0.769 | 0.974 | -0.29 | -2.03 | -0.004(.226) | -0.011(.216) |
| SMhand-<br>rhMiddleCingulum          | 7   | -8  | 51  | 0.122 | 0.83  | -1.55 | -0.94 | 0.058(.217)  | 0.024(.196)  |
| SMhand-rhPrecentral                  | 38  | -22 | 60  | 0.027 | 0.825 | -2.21 | 0.26  | 0.050(.174)  | 0.010(.156)  |
| SMhand-rhPrecentral                  | 20  | -25 | 65  | 0.877 | 0.989 | 0.15  | -2.05 | 0.002(.182)  | 0.005(.179)  |
| SMhand-rhPrecentral                  | 12  | -28 | 70  | 0.554 | 0.974 | -0.59 | -1.92 | 0.026(.190)  | 0.013(.184)  |
| SMhand-rhPrecentral                  | 29  | -14 | 64  | 0.064 | 0.825 | -1.86 | -0.43 | 0.059(.200)  | 0.021(.182)  |
| SMhand-rhPrecentral                  | 17  | -17 | 71  | 0.998 | 0.998 | 0     | -2.08 | 0.027(.168)  | 0.027(.174)  |
| SMhand-rhSuperiorFrontal             | 21  | -6  | 65  | 0.124 | 0.83  | -1.54 | -0.94 | 0.048(.156)  | 0.022(.148)  |
| SMhand-rhPostcentral                 | 30  | -42 | 60  | 0.049 | 0.825 | -1.97 | -0.22 | 0.017(.214)  | -0.027(.194) |

|                                         |     |     |     |       |       |       |       |              |              |
|-----------------------------------------|-----|-----|-----|-------|-------|-------|-------|--------------|--------------|
| SMhand-rhInferiorParietal               | 34  | -41 | 52  | 0.247 | 0.854 | -1.16 | -1.43 | 0.012(.211)  | -0.017(.224) |
| SMhand-rhSupraMarginal                  | 40  | -32 | 40  | 0.129 | 0.83  | -1.52 | -0.97 | 0.037(.202)  | 0.004(.188)  |
| SMhand-rhPostcentral                    | 28  | -35 | 63  | 0.668 | 0.974 | 0.43  | -1.99 | -0.028(.197) | -0.020(.160) |
| SMhand-rhPostcentral                    | 39  | -35 | 58  | 0.433 | 0.923 | -0.78 | -1.76 | 0.007(.201)  | -0.011(.191) |
| SMhand-rhPostcentral                    | 37  | -26 | 51  | 0.096 | 0.825 | -1.66 | -0.75 | 0.043(.246)  | -0.000(.225) |
| SMhand-rhPostcentral                    | 49  | -26 | 52  | 0.039 | 0.825 | -2.06 | -0.04 | 0.041(.217)  | -0.006(.198) |
| SMhand-rhSupraMarginal                  | 53  | -23 | 39  | 0.917 | 0.989 | -0.1  | -2.08 | 0.002(.221)  | -0.000(.192) |
| SMmouth-lhPostcentral                   | -52 | -8  | 38  | 0.931 | 0.989 | 0.09  | -2.07 | 0.005(.227)  | 0.007(.189)  |
| SMmouth-lhPostcentral                   | -42 | -12 | 50  | 0.831 | 0.989 | -0.21 | -2.04 | 0.051(.191)  | 0.047(.185)  |
| SMmouth-lhPostcentral                   | -52 | -12 | 30  | 0.183 | 0.835 | 1.33  | -1.24 | -0.057(.286) | -0.014(.286) |
| SMmouth-lhPostcentral                   | -46 | -18 | 53  | 0.299 | 0.854 | -1.04 | -1.56 | 0.095(.290)  | 0.063(.275)  |
| SMmouth-rhPostcentral                   | 50  | -7  | 36  | 0.78  | 0.974 | -0.28 | -2.03 | 0.016(.219)  | 0.009(.207)  |
| SMmouth-rhPrecentral                    | 42  | -11 | 47  | 0.722 | 0.974 | 0.36  | -2.01 | 0.032(.184)  | 0.039(.176)  |
| SMmouth-rhPostcentral                   | 54  | -8  | 26  | 0.485 | 0.932 | 0.7   | -1.85 | -0.045(.291) | -0.023(.281) |
| SMmouth-rhPrecentral                    | 48  | -15 | 49  | 0.705 | 0.974 | -0.38 | -2.02 | 0.026(.287)  | 0.015(.257)  |
| Subcortical-lhCerebellum                | NA  | NA  | NA  | 0.29  | 0.854 | -1.06 | -1.54 | 0.087(.302)  | 0.056(.258)  |
| Subcortical-lhThalamus                  | NA  | NA  | NA  | 0.332 | 0.913 | -0.97 | -1.62 | 0.059(.152)  | 0.042(.147)  |
| Subcortical-lhCaudate                   | NA  | NA  | NA  | 0.044 | 0.825 | -2.02 | -0.13 | 0.151(.215)  | 0.101(.218)  |
| Subcortical-lhPutamen                   | NA  | NA  | NA  | 0.097 | 0.825 | -1.66 | -0.74 | 0.108(.171)  | 0.073(.180)  |
| Subcortical-lhPallidum                  | NA  | NA  | NA  | 0.594 | 0.974 | 0.53  | -1.94 | 0.049(.159)  | 0.059(.152)  |
| Subcortical-brainStem                   | NA  | NA  | NA  | 0.451 | 0.923 | -0.75 | -1.8  | 0.054(.170)  | 0.038(.178)  |
| Subcortical-lhHippocampus               | NA  | NA  | NA  | 0.251 | 0.854 | -1.15 | -1.43 | 0.016(.153)  | -0.004(.147) |
| Subcortical-lhAmygdala                  | NA  | NA  | NA  | 0.784 | 0.974 | 0.27  | -2.04 | -0.032(.193) | -0.026(.180) |
| Subcortical-lhAccumbens                 | NA  | NA  | NA  | 0.677 | 0.974 | 0.42  | -1.98 | 0.101(.253)  | 0.112(.236)  |
| Subcortical-lhVentraldc                 | NA  | NA  | NA  | 0.645 | 0.974 | -0.46 | -1.96 | 0.076(.183)  | 0.066(.189)  |
| Subcortical-rhCerebellum                | NA  | NA  | NA  | 0.51  | 0.949 | -0.66 | -1.86 | 0.067(.267)  | 0.048(.250)  |
| Subcortical-rhThalamus                  | NA  | NA  | NA  | 0.108 | 0.825 | -1.61 | -0.83 | 0.086(.159)  | 0.056(.159)  |
| Subcortical-rhCaudate                   | NA  | NA  | NA  | 0.287 | 0.854 | -1.07 | -1.54 | 0.146(.245)  | 0.118(.229)  |
| Subcortical-rhPutamen                   | NA  | NA  | NA  | 0.462 | 0.923 | -0.74 | -1.81 | 0.095(.180)  | 0.080(.187)  |
| Subcortical-rhPallidum                  | NA  | NA  | NA  | 0.088 | 0.825 | 1.71  | -0.67 | 0.029(.156)  | 0.059(.154)  |
| Subcortical-rhHippocampus               | NA  | NA  | NA  | 0.303 | 0.859 | -1.03 | -1.57 | 0.020(.150)  | 0.002(.152)  |
| Subcortical-rhAmygdala                  | NA  | NA  | NA  | 0.933 | 0.989 | 0.08  | -2.06 | -0.019(.181) | -0.018(.194) |
| Subcortical-rhAccumbens                 | NA  | NA  | NA  | 0.974 | 0.989 | 0.03  | -2.08 | 0.098(.220)  | 0.099(.229)  |
| Subcortical-rhVentraldc                 | NA  | NA  | NA  | 0.182 | 0.835 | -1.34 | -1.22 | 0.096(.188)  | 0.067(.189)  |
| VentralAttn-lhSupplementaryMotor        | -4  | 12  | 65  | 0.519 | 0.956 | -0.65 | -1.85 | 0.025(.144)  | 0.012(.162)  |
| VentralAttn-lhMiddleTemporal            | -45 | -54 | 15  | 0.823 | 0.987 | 0.22  | -2.05 | -0.026(.231) | -0.020(.221) |
| VentralAttn-lhMiddleTemporal            | -52 | -56 | 11  | 0.659 | 0.974 | -0.44 | -1.99 | -0.018(.229) | -0.029(.222) |
| VentralAttn-lhMiddleTemporal            | -48 | -40 | 2   | 0.469 | 0.923 | -0.72 | -1.82 | -0.036(.189) | -0.051(.180) |
| VentralAttn-lhTriangularInferiorFrontal | -50 | 21  | 11  | 0.056 | 0.825 | -1.91 | -0.33 | -0.017(.235) | -0.067(.229) |
| VentralAttn-lhOrbitalInferiorFrontal    | -47 | 39  | -9  | 0.213 | 0.854 | -1.24 | -1.33 | -0.056(.305) | -0.102(.327) |
| VentralAttn-lhInsula                    | -29 | 20  | -14 | 0.654 | 0.974 | -0.45 | -1.98 | -0.005(.186) | -0.016(.202) |
| VentralAttn-lhOrbitalInferiorFrontal    | -44 | 33  | -7  | 0.998 | 0.998 | 0     | -2.06 | -0.089(.230) | -0.089(.267) |

|                                         |     |     |     |       |       |       |       |              |              |
|-----------------------------------------|-----|-----|-----|-------|-------|-------|-------|--------------|--------------|
| VentralAttn-lhTriangularInferiorFrontal | -45 | 29  | 1   | 0.868 | 0.989 | 0.17  | -2.06 | -0.107(.309) | -0.102(.273) |
| VentralAttn-lhPrecentral                | -39 | 5   | 48  | 0.115 | 0.827 | -1.58 | -0.89 | 0.030(.205)  | -0.005(.199) |
| VentralAttn-lhMiddleTemporal            | -59 | -18 | -3  | 0.25  | 0.854 | -1.15 | -1.45 | -0.013(.251) | -0.043(.226) |
| VentralAttn-rhMiddleTemporal            | 58  | -45 | 9   | 0.798 | 0.974 | -0.26 | -2.03 | -0.015(.229) | -0.021(.208) |
| VentralAttn-rhMiddleTemporal            | 61  | -39 | 2   | 0.967 | 0.989 | -0.04 | -2.07 | -0.041(.191) | -0.042(.213) |
| VentralAttn-rhSuperiorTemporal          | 57  | -17 | -3  | 0.689 | 0.974 | 0.4   | -2    | -0.019(.245) | -0.009(.210) |
| VentralAttn-rhSuperiorTemporal          | 47  | -40 | 13  | 0.419 | 0.923 | -0.81 | -1.78 | 0.019(.219)  | 0.000(.210)  |
| VentralAttn-rhMiddleTemporal            | 46  | -37 | 3   | 0.708 | 0.974 | -0.37 | -2.01 | -0.012(.218) | -0.021(.206) |
| VentralAttn-rhSuperiorTemporal          | 48  | -26 | 0   | 0.678 | 0.974 | -0.41 | -2    | -0.003(.212) | -0.012(.187) |
| VentralAttn-rhTriangularInferiorFrontal | 52  | 24  | 10  | 0.607 | 0.974 | -0.51 | -1.96 | -0.021(.260) | -0.035(.246) |
| VentralAttn-rhOrbitalInferiorFrontal    | 48  | 38  | -9  | 0.142 | 0.831 | -1.47 | -1.05 | -0.027(.345) | -0.081(.321) |
| VentralAttn-rhOrbitalInferiorFrontal    | 45  | 31  | -6  | 0.59  | 0.974 | -0.54 | -1.93 | -0.025(.223) | -0.039(.224) |
| VentralAttn-rhInsula                    | 27  | 20  | -15 | 0.993 | 0.998 | -0.01 | -2.07 | 0.032(.230)  | 0.032(.207)  |
| VentralAttn-rhSuperiorTemporal          | 57  | -6  | -8  | 0.959 | 0.989 | 0.05  | -2.06 | -0.032(.209) | -0.031(.212) |
| VentralAttn-rhMiddleTemporal            | 47  | -22 | -8  | 0.474 | 0.923 | -0.72 | -1.85 | 0.000(.260)  | -0.021(.260) |
| Visual-lhSuperiorOccipital              | -18 | -86 | 22  | 0.903 | 0.989 | 0.12  | -2.08 | -0.030(.227) | -0.027(.222) |
| Visual-lhLingual                        | -17 | -60 | -5  | 0.689 | 0.974 | 0.4   | -2    | -0.006(.239) | 0.005(.241)  |
| Visual-lhCalcarine                      | -11 | -83 | 4   | 0.582 | 0.974 | -0.55 | -1.92 | 0.062(.315)  | 0.041(.341)  |
| Visual-lhLingual                        | -22 | -58 | 2   | 0.519 | 0.956 | -0.64 | -1.87 | 0.014(.354)  | -0.012(.361) |
| Visual-lhLingual                        | -10 | -58 | 3   | 0.792 | 0.974 | -0.26 | -2.04 | -0.072(.536) | -0.088(.518) |
| Visual-lhLingual                        | -17 | -46 | -4  | 0.882 | 0.989 | -0.15 | -2.07 | -0.009(.345) | -0.015(.313) |
| Visual-lhSuperiorOccipital              | -14 | -77 | 27  | 0.278 | 0.854 | 1.09  | -1.51 | -0.030(.223) | -0.004(.214) |
| Visual-lhMiddleOccipital                | -31 | -84 | 9   | 0.683 | 0.974 | -0.41 | -2    | -0.045(.283) | -0.057(.247) |
| Visual-lhMiddleOccipital                | -34 | -87 | 0   | 0.49  | 0.933 | 0.69  | -1.84 | -0.058(.298) | -0.036(.276) |
| Visual-lhMiddleOccipital                | -43 | -68 | 10  | 0.087 | 0.825 | -1.71 | -0.69 | 0.033(.211)  | -0.004(.194) |
| Visual-lhFusiform                       | -29 | -59 | -9  | 0.529 | 0.96  | -0.63 | -1.88 | 0.017(.259)  | 0.000(.233)  |
| Visual-lhFusiform                       | -34 | -64 | -16 | 0.023 | 0.825 | -2.27 | 0.39  | 0.112(.336)  | 0.036(.294)  |
| Visual-lhFusiform                       | -34 | -44 | -22 | 0.609 | 0.974 | -0.51 | -1.94 | -0.001(.265) | -0.015(.244) |
| Visual-lhCuneus                         | -5  | -88 | 19  | 0.181 | 0.835 | 1.34  | -1.23 | -0.009(.243) | 0.028(.243)  |
| Visual-lhLingual                        | -9  | -78 | -4  | 0.431 | 0.923 | 0.79  | -1.77 | 0.031(.308)  | 0.060(.322)  |
| Visual-lhInferiorOccipital              | -41 | -72 | -6  | 0.885 | 0.989 | 0.14  | -2.05 | -0.032(.222) | -0.028(.230) |
| Visual-lhInferiorOccipital              | -25 | -97 | -8  | 0.781 | 0.974 | 0.28  | -2.03 | -0.042(.461) | -0.028(.442) |
| Visual-lhLingual                        | -23 | -82 | -12 | 0.387 | 0.918 | -0.87 | -1.7  | 0.107(.309)  | 0.076(.310)  |
| Visual-rhSuperiorOccipital              | 22  | -85 | 24  | 0.872 | 0.989 | -0.16 | -2.07 | -0.026(.245) | -0.030(.230) |
| Visual-rhFusiform                       | 22  | -46 | -10 | 0.181 | 0.835 | 1.34  | -1.2  | -0.043(.223) | -0.005(.242) |
| Visual-rhCalcarine                      | 16  | -74 | 9   | 0.56  | 0.974 | 0.58  | -1.92 | 0.018(.360)  | 0.041(.339)  |
| Visual-rhLingual                        | 20  | -45 | -4  | 0.574 | 0.974 | 0.56  | -1.93 | -0.033(.363) | -0.013(.307) |
| Visual-rhLingual                        | 16  | -60 | -5  | 0.271 | 0.854 | -1.1  | -1.51 | 0.044(.276)  | 0.011(.270)  |

|                           |    |     |     |       |       |       |       |              |              |
|---------------------------|----|-----|-----|-------|-------|-------|-------|--------------|--------------|
| Visual-rhInferiorParietal | 27 | -55 | 54  | 0.736 | 0.974 | -0.34 | -2.02 | 0.023(.189)  | 0.015(.200)  |
| Visual-rhCuneus           | 18 | -78 | 34  | 0.768 | 0.974 | -0.29 | -2.04 | 0.010(.253)  | 0.002(.221)  |
| Visual-rhCuneus           | 8  | -86 | 32  | 0.933 | 0.989 | 0.08  | -2.06 | 0.010(.279)  | 0.013(.269)  |
| Visual-rhMiddleOccipital  | 35 | -77 | 21  | 0.937 | 0.989 | -0.08 | -2.06 | -0.013(.256) | -0.015(.219) |
| Visual-rhMiddleOccipital  | 32 | -86 | 2   | 0.889 | 0.989 | 0.14  | -2.08 | 0.065(.267)  | 0.070(.269)  |
| Visual-rhMiddleTemporal   | 44 | -67 | 2   | 0.792 | 0.974 | -0.26 | -2.04 | 0.017(.195)  | 0.012(.188)  |
| Visual-rhInferiorTemporal | 47 | -52 | -12 | 0.394 | 0.918 | -0.85 | -1.72 | 0.048(.205)  | 0.029(.191)  |
| Visual-rhMiddleTemporal   | 49 | -54 | 9   | 0.5   | 0.942 | -0.67 | -1.87 | 0.011(.218)  | -0.004(.195) |
| Visual-rhFusiform         | 31 | -46 | -6  | 0.59  | 0.974 | -0.54 | -1.93 | -0.011(.278) | -0.027(.267) |
| Visual-rhFusiform         | 27 | -69 | -7  | 0.259 | 0.854 | -1.13 | -1.48 | 0.104(.271)  | 0.071(.254)  |
| Visual-rhFusiform         | 35 | -44 | -20 | 0.784 | 0.974 | -0.27 | -2.03 | 0.061(.239)  | 0.053(.250)  |
| Visual-rhCuneus           | 14 | -92 | 15  | 0.908 | 0.989 | 0.12  | -2.07 | -0.033(.268) | -0.029(.273) |
| Visual-rhLingual          | 10 | -74 | -2  | 0.751 | 0.974 | 0.32  | -2.03 | 0.037(.306)  | 0.048(.298)  |
| Visual-rhLingual          | 20 | -87 | -7  | 0.276 | 0.854 | -1.09 | -1.49 | 0.202(.447)  | 0.152(.393)  |
| Visual-rhCuneus           | 5  | -80 | 23  | 0.759 | 0.974 | -0.31 | -2.03 | 0.038(.307)  | 0.028(.276)  |
| Visual-rhCuneus           | 15 | -70 | 23  | 0.392 | 0.918 | 0.86  | -1.73 | -0.028(.268) | -0.003(.256) |

\* = qFDR < .05. Bold = qFDR < .05 or  $\ln(\text{BF}_{10}) > 1.1$ . Note that x, y and z values here refer to the Montreal Neurological Institute (MNI) coordinates at the centroid of each cortical-surface region-of-interest (ROI) of a standard MNI brain. The label for each cortical-surface ROI is based on the Automated Anatomical Labeling (AAL) algorithm<sup>2</sup> via the mni2aal R package (<https://github.com/yunshiuian/label4MRI>). The label for each subcortical-volumetric ROI is based on Freesurfer' segmentation algorithm<sup>3</sup>, applied on each participant's individual brain space. Given that individual brain space was used for subcortical ROIs, their x, y and z coordinates are not given here. \* = qFDR < .05. Bold = qFDR < .05 or  $\ln(\text{BF}_{10}) > 1.1$ . The value of  $\ln(\text{BF}_{10}) > 1.1$  and < -1.2 are interpreted as substantial evidence for the alternative (of there being a difference), and null hypotheses (of there being *no* difference), respectively.

**eTable 9.** Group differences between children with vs. without ADHD during reward anticipation [Large Reward > Neutral Cue] in the MID task-fMRI activation

| Name: Network-ROI                    | x         | y        | z         | p            | q <sub>FDR</sub> | t           | ln(BF <sub>10</sub> ) | With ADHD<br>M(SD) | Without ADHD<br>M(SD) |
|--------------------------------------|-----------|----------|-----------|--------------|------------------|-------------|-----------------------|--------------------|-----------------------|
| Auditory-lhHeschl                    | -32       | -29      | 16        | 0.421        | 0.703            | 0.8         | -2.49                 | -0.015(.250)       | -0.005(.235)          |
| Auditory-lhSupraMarginal             | -46       | -41      | 26        | 0.042        | 0.385            | 2.03        | -0.76                 | -0.035(.258)       | -0.007(.258)          |
| Auditory-lhOpercularRolandic         | -36       | -34      | 20        | 0.881        | 0.969            | 0.15        | -2.79                 | -0.009(.278)       | -0.007(.276)          |
| Auditory-lhSuperiorTemporal          | -53       | -21      | 5         | 0.983        | 0.996            | -0.02       | -2.79                 | 0.019(.210)        | 0.018(.203)           |
| Auditory-lhSuperiorTemporal          | -60       | -38      | 16        | 0.763        | 0.899            | -0.3        | -2.74                 | -0.003(.207)       | -0.006(.199)          |
| Auditory-lhSuperiorTemporal          | -59       | -30      | 11        | 0.364        | 0.65             | -0.91       | -2.39                 | 0.010(.216)        | 0.000(.198)           |
| Auditory-lhSuperiorTemporal          | -41       | -38      | 14        | 0.21         | 0.555            | 1.26        | -2.03                 | -0.013(.255)       | 0.003(.236)           |
| Auditory-lhInsula                    | -34       | -22      | 10        | 0.752        | 0.891            | -0.32       | -2.75                 | -0.004(.220)       | -0.008(.213)          |
| Auditory-lhInsula                    | -37       | -14      | 19        | 0.429        | 0.709            | 0.79        | -2.49                 | -0.036(.241)       | -0.026(.240)          |
| Auditory-lhOpercularRolandic         | -52       | -14      | 15        | 0.766        | 0.899            | -0.3        | -2.76                 | -0.022(.296)       | -0.026(.279)          |
| Auditory-lhSupraMarginal             | -51       | -22      | 19        | 0.136        | 0.506            | 1.49        | -1.7                  | -0.030(.231)       | -0.012(.222)          |
| Auditory-lhSuperiorTemporal          | -54       | -1       | -1        | 0.728        | 0.887            | -0.35       | -2.72                 | -0.006(.181)       | -0.009(.170)          |
| Auditory-rhInsula                    | 34        | -22      | 13        | 0.899        | 0.97             | -0.13       | -2.8                  | -0.014(.221)       | -0.016(.216)          |
| Auditory-rhOpercularRolandic         | 36        | -31      | 19        | 0.476        | 0.735            | 0.71        | -2.55                 | -0.025(.243)       | -0.016(.234)          |
| Auditory-rhSuperiorTemporal          | 54        | -16      | 5         | 0.445        | 0.714            | 0.76        | -2.51                 | -0.001(.219)       | 0.007(.208)           |
| Auditory-rhSuperiorTemporal          | 59        | -39      | 15        | 0.637        | 0.834            | 0.47        | -2.69                 | -0.003(.195)       | 0.002(.186)           |
| Auditory-rhSuperiorTemporal          | 62        | -24      | 1         | 0.258        | 0.594            | -1.13       | -2.16                 | 0.005(.223)        | -0.008(.205)          |
| Auditory-rhSuperiorTemporal          | 60        | -25      | 10        | 0.285        | 0.616            | 1.07        | -2.23                 | -0.021(.210)       | -0.010(.190)          |
| Auditory-rhInsula                    | 38        | -12      | 20        | 0.366        | 0.65             | 0.9         | -2.4                  | -0.055(.287)       | -0.042(.262)          |
| Auditory-rhInsula                    | 37        | -10      | 12        | 0.222        | 0.569            | 1.22        | -2.06                 | -0.028(.253)       | -0.012(.246)          |
| Auditory-rhOpercularRolandic         | 61        | -2       | 11        | 0.302        | 0.629            | 1.03        | -2.27                 | -0.027(.274)       | -0.012(.266)          |
| Auditory-rhOpercularRolandic         | 54        | -14      | 17        | 0.205        | 0.551            | 1.27        | -2                    | -0.049(.254)       | -0.032(.244)          |
| Auditory-rhSuperiorTemporal          | 40        | -22      | 3         | 0.283        | 0.615            | 1.07        | -2.22                 | -0.042(.382)       | -0.020(.378)          |
| Auditory-rhSuperiorTemporal          | 56        | 2        | -2        | 0.138        | 0.506            | 1.48        | -1.7                  | -0.015(.169)       | -0.002(.158)          |
| CinguloOperc-lhMiddleCingulum        | -17       | -36      | 43        | 0.039        | 0.385            | 2.06        | -0.7                  | -0.025(.174)       | -0.006(.178)          |
| <b>CinguloOperc-lhMiddleCingulum</b> | <b>-9</b> | <b>0</b> | <b>43</b> | <b>0.004</b> | <b>0.214</b>     | <b>2.91</b> | <b>1.38</b>           | <b>0.020(.173)</b> | <b>0.047(.170)</b>    |

|                                          |            |            |           |              |              |             |             |                     |                     |
|------------------------------------------|------------|------------|-----------|--------------|--------------|-------------|-------------|---------------------|---------------------|
| CinguloOperc-lhMiddleCingulum            | -8         | 15         | 34        | 0.149        | 0.506        | 1.44        | -1.77       | 0.028(.190)         | 0.043(.194)         |
| CinguloOperc-lhAnteriorCingulum          | -9         | 25         | 28        | 0.017        | 0.358        | 2.38        | 0           | 0.027(.252)         | 0.059(.245)         |
| <b>CinguloOperc-lhSupplementaryMotor</b> | <b>-8</b>  | <b>-9</b>  | <b>63</b> | <b>0.002</b> | <b>0.214</b> | <b>3.16</b> | <b>2.12</b> | <b>0.027(.164)</b>  | <b>0.055(.163)</b>  |
| CinguloOperc-lhPrecentral                | -42        | -4         | 47        | 0.733        | 0.887        | 0.34        | -2.74       | 0.035(.209)         | 0.039(.208)         |
| CinguloOperc-lhSupraMarginal             | -58        | -41        | 36        | 0.03         | 0.385        | 2.17        | -0.48       | -0.030(.199)        | -0.008(.192)        |
| CinguloOperc-lhSuperiorTemporal          | -39        | -16        | -5        | 0.819        | 0.939        | 0.23        | -2.77       | -0.023(.192)        | -0.021(.191)        |
| CinguloOperc-lhInsula                    | -39        | -2         | -12       | 0.225        | 0.569        | 1.21        | -2.07       | -0.020(.181)        | -0.008(.185)        |
| CinguloOperc-lhInsula                    | -38        | 3          | 12        | 0.967        | 0.987        | 0.04        | -2.8        | 0.026(.193)         | 0.026(.183)         |
| CinguloOperc-lhInsula                    | -37        | 1          | 6         | 0.034        | 0.385        | 2.12        | -0.59       | -0.009(.204)        | 0.014(.195)         |
| CinguloOperc-lhInsula                    | -37        | 9          | -1        | 0.85         | 0.957        | -0.19       | -2.78       | 0.031(.204)         | 0.029(.204)         |
| CinguloOperc-lhInsula                    | -29        | 24         | 8         | 0.316        | 0.64         | 1           | -2.3        | 0.077(.207)         | 0.088(.198)         |
| CinguloOperc-lhOpercularRolandic         | -60        | -4         | 9         | 0.596        | 0.797        | 0.53        | -2.65       | -0.031(.280)        | -0.023(.272)        |
| <b>CinguloOperc-lhSuperiorTemporal</b>   | <b>-55</b> | <b>-32</b> | <b>23</b> | <b>0.003</b> | <b>0.214</b> | <b>2.96</b> | <b>1.51</b> | <b>-0.065(.231)</b> | <b>-0.029(.217)</b> |
| CinguloOperc-lhSupraMarginal             | -59        | -24        | 31        | 0.04         | 0.385        | 2.06        | -0.7        | -0.030(.193)        | -0.009(.191)        |
| CinguloOperc-lhOpercularRolandic         | -52        | -1         | 5         | 0.157        | 0.506        | 1.42        | -1.81       | 0.004(.230)         | 0.021(.213)         |
| CinguloOperc-lhOpercularInferiorFrontal  | -49        | 8          | 11        | 0.128        | 0.506        | 1.52        | -1.67       | -0.018(.213)        | -0.002(.193)        |
| CinguloOperc-lhMiddleFrontal             | -27        | 47         | 21        | 0.283        | 0.615        | 1.07        | -2.22       | -0.001(.251)        | 0.013(.237)         |
| CinguloOperc-lhMiddleFrontal             | -29        | 38         | 28        | 0.093        | 0.482        | 1.68        | -1.41       | -0.011(.219)        | 0.008(.208)         |
| CinguloOperc-rhMiddleCingulum            | 16         | -33        | 43        | 0.153        | 0.506        | 1.43        | -1.8        | -0.015(.171)        | -0.001(.174)        |
| CinguloOperc-rhSupplementaryMotor        | 7          | 5          | 56        | 0.054        | 0.42         | 1.93        | -0.96       | 0.061(.206)         | 0.082(.195)         |
| CinguloOperc-rhMiddleCingulum            | 9          | 4          | 40        | 0.03         | 0.385        | 2.17        | -0.47       | 0.024(.183)         | 0.045(.174)         |
| CinguloOperc-rhMiddleCingulum            | 9          | 11         | 46        | 0.04         | 0.385        | 2.06        | -0.7        | 0.050(.202)         | 0.073(.209)         |
| CinguloOperc-rhMiddleCingulum            | 6          | 22         | 32        | 0.084        | 0.482        | 1.73        | -1.33       | 0.041(.206)         | 0.060(.202)         |
| CinguloOperc-rhSupplementaryMotor        | 16         | 1          | 68        | 0.163        | 0.506        | 1.4         | -1.84       | 0.023(.159)         | 0.036(.164)         |
| CinguloOperc-rhSupplementaryMotor        | 8          | -6         | 64        | 0.09         | 0.482        | 1.7         | -1.38       | 0.041(.162)         | 0.056(.163)         |
| CinguloOperc-rhPrecentral                | 42         | -2         | 47        | 0.164        | 0.506        | 1.39        | -1.85       | 0.031(.201)         | 0.045(.194)         |
| CinguloOperc-rhSupraMarginal             | 58         | -40        | 35        | 0.545        | 0.759        | 0.6         | -2.62       | 0.011(.178)         | 0.017(.177)         |
| CinguloOperc-rhSupraMarginal             | 55         | -27        | 30        | 0.031        | 0.385        | 2.16        | -0.5        | -0.043(.179)        | -0.022(.178)        |
| CinguloOperc-rhInsula                    | 39         | -14        | -5        | 0.085        | 0.482        | 1.73        | -1.33       | -0.032(.201)        | -0.014(.191)        |
| CinguloOperc-rhInsula                    | 40         | 1          | -13       | 0.347        | 0.646        | 0.94        | -2.36       | -0.013(.221)        | -0.003(.206)        |

|                                  |     |     |     |       |       |       |       |              |              |
|----------------------------------|-----|-----|-----|-------|-------|-------|-------|--------------|--------------|
| CinguloOperc-rhInsula            | 37  | 5   | 13  | 0.132 | 0.506 | 1.51  | -1.67 | 0.012(.209)  | 0.029(.201)  |
| CinguloOperc-rhInsula            | 40  | 10  | -2  | 0.012 | 0.349 | 2.5   | 0.29  | 0.025(.193)  | 0.050(.185)  |
| CinguloOperc-rhInsula            | 36  | 6   | 6   | 0.029 | 0.385 | 2.19  | -0.42 | 0.007(.191)  | 0.029(.188)  |
| CinguloOperc-rhInsula            | 34  | 23  | 4   | 0.134 | 0.506 | 1.5   | -1.69 | 0.129(.251)  | 0.149(.248)  |
| CinguloOperc-rhInsula            | 34  | 24  | 10  | 0.397 | 0.67  | 0.85  | -2.45 | 0.086(.229)  | 0.096(.216)  |
| CinguloOperc-rhOpercularRolandic | 50  | 3   | 4   | 0.793 | 0.924 | -0.26 | -2.76 | 0.030(.196)  | 0.027(.190)  |
| CinguloOperc-rhSuperiorFrontal   | 24  | 51  | 24  | 0.072 | 0.482 | 1.8   | -1.2  | -0.021(.236) | 0.002(.229)  |
| CinguloOperc-rhMiddleFrontal     | 31  | 40  | 26  | 0.296 | 0.627 | 1.05  | -2.26 | 0.011(.218)  | 0.023(.207)  |
| CinguloParietal-lhMiddleCingulum | -6  | -26 | 28  | 0.302 | 0.629 | 1.03  | -2.28 | 0.024(.262)  | 0.038(.260)  |
| CinguloParietal-lhPrecuneus      | -13 | -65 | 32  | 0.055 | 0.421 | 1.92  | -0.99 | -0.032(.243) | -0.006(.248) |
| CinguloParietal-lhPrecuneus      | -11 | -73 | 43  | 0.169 | 0.508 | 1.38  | -1.87 | -0.005(.236) | 0.013(.238)  |
| CinguloParietal-rhMiddleCingulum | 8   | -27 | 28  | 0.026 | 0.385 | 2.22  | -0.37 | 0.015(.262)  | 0.046(.263)  |
| CinguloParietal-rhCuneus         | 16  | -70 | 40  | 0.332 | 0.643 | 0.97  | -2.34 | 0.011(.219)  | 0.023(.225)  |
| Default-lhPrecuneus              | -11 | -52 | 36  | 0.568 | 0.777 | 0.57  | -2.65 | -0.004(.203) | 0.002(.200)  |
| Default-lhSuperiorFrontal        | -12 | 27  | 57  | 0.166 | 0.508 | 1.39  | -1.85 | -0.021(.149) | -0.010(.152) |
| Default-lhAngular                | -47 | -58 | 31  | 0.337 | 0.643 | 0.96  | -2.35 | -0.014(.179) | -0.005(.183) |
| Default-lhMedialSuperiorFrontal  | -6  | 42  | 35  | 0.259 | 0.594 | 1.13  | -2.17 | -0.003(.182) | 0.008(.192)  |
| Default-lhMiddleCingulum         | -2  | -18 | 39  | 0.531 | 0.749 | 0.63  | -2.61 | 0.001(.217)  | 0.008(.212)  |
| Default-lhSuperiorFrontal        | -20 | 30  | 46  | 0.305 | 0.629 | 1.03  | -2.28 | 0.006(.166)  | 0.016(.164)  |
| Default-lhMiddleOccipital        | -39 | -74 | 38  | 0.532 | 0.749 | -0.63 | -2.61 | 0.014(.201)  | 0.008(.196)  |
| Default-lhOrbitalSuperiorFrontal | -28 | 54  | 0   | 0.091 | 0.482 | 1.69  | -1.38 | 0.016(.357)  | 0.047(.327)  |
| Default-lhOrbitalMedialFrontal   | -6  | 55  | -11 | 0.265 | 0.594 | -1.11 | -2.17 | -0.024(.428) | -0.048(.378) |
| Default-lhOrbitalMedialFrontal   | -7  | 38  | -9  | 0.264 | 0.594 | -1.12 | -2.18 | 0.031(.355)  | 0.011(.334)  |
| Default-lhMiddleTemporal         | -63 | -29 | -7  | 0.531 | 0.749 | 0.63  | -2.58 | 0.002(.291)  | 0.012(.275)  |
| Default-lhMiddleTemporal         | -53 | -11 | -16 | 0.523 | 0.749 | -0.64 | -2.58 | -0.028(.217) | -0.036(.222) |
| Default-lhSuperiorFrontal        | -16 | 49  | 37  | 0.154 | 0.506 | 1.43  | -1.8  | -0.022(.204) | -0.007(.189) |
| Default-lhSuperiorFrontal        | -20 | 56  | 28  | 0.38  | 0.656 | 0.88  | -2.4  | -0.027(.202) | -0.017(.207) |
| Default-lhMedialSuperiorFrontal  | -6  | 55  | 18  | 0.718 | 0.887 | 0.36  | -2.73 | -0.009(.215) | -0.005(.201) |
| Default-lhSuperiorFrontal        | -16 | 65  | 14  | 0.693 | 0.876 | 0.39  | -2.7  | 0.004(.323)  | 0.010(.297)  |
| Default-lhAnteriorCingulum       | -6  | 45  | 6   | 0.928 | 0.983 | 0.09  | -2.79 | 0.045(.226)  | 0.046(.218)  |
| Default-lhMiddleFrontal          | -26 | 27  | 39  | 0.531 | 0.749 | -0.63 | -2.6  | 0.009(.197)  | 0.002(.206)  |
| Default-lhMiddleFrontal          | -29 | 17  | 51  | 0.351 | 0.65  | 0.93  | -2.37 | 0.032(.195)  | 0.042(.188)  |
| Default-lhMiddleFrontal          | -42 | 16  | 48  | 0.098 | 0.482 | 1.66  | -1.45 | -0.007(.173) | 0.010(.184)  |
| Default-rhPrecuneus              | 12  | -52 | 34  | 0.69  | 0.876 | 0.4   | -2.73 | -0.010(.188) | -0.005(.191) |
| Default-rhSupplementaryMotor     | 12  | 22  | 60  | 0.944 | 0.983 | -0.07 | -2.79 | -0.020(.144) | -0.021(.144) |
| Default-rhAnteriorCingulum       | 8   | 44  | 6   | 0.326 | 0.642 | 0.98  | -2.32 | 0.042(.215)  | 0.054(.211)  |

|                                        |     |     |     |       |       |       |       |              |              |
|----------------------------------------|-----|-----|-----|-------|-------|-------|-------|--------------|--------------|
| Default-rhMiddleCingulum               | 3   | -20 | 38  | 0.237 | 0.579 | -1.18 | -2.12 | 0.009(.235)  | -0.005(.224) |
| Default-rhSuperiorFrontal              | 22  | 21  | 46  | 0.579 | 0.787 | 0.55  | -2.65 | 0.006(.167)  | 0.011(.171)  |
| Default-rhAngular                      | 49  | -53 | 29  | 0.932 | 0.983 | 0.09  | -2.8  | -0.019(.186) | -0.018(.186) |
| Default-rhMiddleTemporal               | 62  | -26 | -6  | 0.226 | 0.569 | -1.21 | -2.06 | 0.011(.241)  | -0.005(.235) |
| Default-rhPrecuneus                    | 7   | -69 | 50  | 0.287 | 0.617 | 1.06  | -2.24 | 0.031(.266)  | 0.046(.267)  |
| Default-rhAngular                      | 46  | -67 | 36  | 0.697 | 0.876 | 0.39  | -2.73 | 0.008(.188)  | 0.012(.188)  |
| Default-rhOrbitalMedialFrontal         | 5   | 65  | -7  | 0.872 | 0.965 | 0.16  | -2.75 | -0.023(.468) | -0.019(.413) |
| Default-rhOrbitalMedialFrontal         | 7   | 48  | -10 | 0.425 | 0.706 | 0.8   | -2.47 | -0.064(.394) | -0.048(.368) |
| Default-rhMiddleTemporal               | 58  | -7  | -16 | 0.147 | 0.506 | 1.45  | -1.73 | -0.043(.224) | -0.025(.219) |
| Default-rhMiddleFrontal                | 21  | 33  | 42  | 0.796 | 0.924 | -0.26 | -2.77 | -0.001(.171) | -0.003(.180) |
| Default-rhSuperiorFrontal              | 21  | 43  | 35  | 0.741 | 0.891 | 0.33  | -2.75 | -0.004(.197) | -0.000(.196) |
| Default-rhSuperiorFrontal              | 16  | 61  | 20  | 0.366 | 0.65  | 0.9   | -2.38 | -0.028(.254) | -0.016(.245) |
| Default-rhMedialSuperiorFrontal        | 8   | 54  | 14  | 0.728 | 0.887 | 0.35  | -2.74 | -0.016(.229) | -0.012(.201) |
| Default-rhMedialSuperiorFrontal        | 6   | 55  | 29  | 0.246 | 0.592 | 1.16  | -2.12 | -0.047(.223) | -0.033(.215) |
| Default-rhSuperiorFrontal              | 14  | 47  | 42  | 0.663 | 0.855 | 0.44  | -2.7  | -0.023(.191) | -0.019(.183) |
| Default-rhMedialSuperiorFrontal        | 7   | 44  | 35  | 0.382 | 0.656 | 0.87  | -2.42 | 0.005(.189)  | 0.013(.181)  |
| Default-rhMiddleFrontal                | 31  | 19  | 49  | 0.569 | 0.777 | 0.57  | -2.64 | 0.027(.212)  | 0.033(.199)  |
| Default-rhSuperiorTemporal             | 54  | 1   | -13 | 0.159 | 0.506 | -1.41 | -1.82 | -0.000(.212) | -0.017(.223) |
| DorsalAttn-lhPrecentral                | -27 | -7  | 46  | 0.019 | 0.364 | 2.35  | -0.06 | 0.009(.182)  | 0.032(.178)  |
| DorsalAttn-lhMiddleFrontal             | -27 | 2   | 53  | 0.344 | 0.644 | 0.95  | -2.36 | 0.018(.166)  | 0.026(.172)  |
| DorsalAttn-lhSuperiorFrontal           | -20 | 6   | 56  | 0.012 | 0.349 | 2.51  | 0.31  | -0.001(.187) | 0.024(.182)  |
| DorsalAttn-lhSuperiorFrontal           | -21 | 0   | 63  | 0.112 | 0.506 | 1.59  | -1.54 | 0.008(.165)  | 0.022(.152)  |
| DorsalAttn-lhInferiorParietal          | -31 | -49 | 47  | 0.015 | 0.349 | 2.44  | 0.12  | 0.015(.199)  | 0.041(.194)  |
| DorsalAttn-lhInferiorParietal          | -43 | -45 | 43  | 0.043 | 0.385 | 2.02  | -0.78 | 0.068(.202)  | 0.090(.196)  |
| DorsalAttn-lhInferiorParietal          | -52 | -31 | 40  | 0.056 | 0.421 | 1.91  | -1    | 0.005(.195)  | 0.024(.189)  |
| DorsalAttn-lhTriangularInferiorFrontal | -44 | 36  | 8   | 0.953 | 0.983 | -0.06 | -2.8  | -0.032(.264) | -0.033(.258) |
| DorsalAttn-lhSuperiorParietal          | -20 | -65 | 51  | 0.189 | 0.529 | 1.31  | -1.96 | -0.005(.195) | 0.009(.205)  |
| DorsalAttn-lhMiddleOccipital           | -26 | -65 | 32  | 0.186 | 0.528 | 1.32  | -1.95 | 0.031(.222)  | 0.047(.218)  |
| DorsalAttn-lhPrecuneus                 | -10 | -57 | 60  | 0.892 | 0.97  | 0.14  | -2.8  | -0.001(.188) | -0.000(.185) |
| DorsalAttn-lhPrecuneus                 | -7  | -64 | 55  | 0.207 | 0.553 | 1.26  | -2.02 | 0.012(.240)  | 0.028(.238)  |
| DorsalAttn-lhMiddleOccipital           | -30 | -74 | 36  | 0.091 | 0.482 | 1.69  | -1.4  | 0.031(.237)  | 0.052(.227)  |
| DorsalAttn-lhInferiorTemporal          | -46 | -58 | -8  | 0.927 | 0.983 | -0.09 | -2.79 | -0.003(.186) | -0.003(.180) |
| DorsalAttn-lhPrecentral                | -45 | 3   | 32  | 0.115 | 0.506 | 1.58  | -1.57 | 0.021(.213)  | 0.039(.209)  |
| DorsalAttn-lhPrecentral                | -35 | 6   | 34  | 0.048 | 0.394 | 1.97  | -0.88 | 0.004(.280)  | 0.033(.274)  |

|                                            |            |           |           |              |              |             |             |                    |                    |
|--------------------------------------------|------------|-----------|-----------|--------------|--------------|-------------|-------------|--------------------|--------------------|
| DorsalAttn-lhMiddleFrontal                 | -38        | 38        | 17        | 0.014        | 0.349        | 2.45        | 0.16        | 0.012(.247)        | 0.044(.240)        |
| DorsalAttn-lhOpercularInferiorFrontal      | -42        | 9         | 22        | 0.886        | 0.969        | 0.14        | -2.8        | 0.016(.249)        | 0.018(.248)        |
| DorsalAttn-lhMiddleFrontal                 | -36        | 33        | 32        | 0.014        | 0.349        | 2.45        | 0.16        | -0.000(.210)       | 0.027(.205)        |
| DorsalAttn-rhPrecuneus                     | 10         | -57       | 58        | 0.386        | 0.66         | 0.87        | -2.43       | 0.002(.189)        | 0.011(.186)        |
| DorsalAttn-rhMiddleFrontal                 | 29         | 2         | 52        | 0.099        | 0.482        | 1.65        | -1.46       | 0.019(.173)        | 0.034(.167)        |
| DorsalAttn-rhPrecentral                    | 30         | -8        | 47        | 0.043        | 0.385        | 2.02        | -0.78       | 0.017(.203)        | 0.038(.189)        |
| DorsalAttn-rhSuperiorFrontal               | 23         | 6         | 58        | 0.049        | 0.394        | 1.97        | -0.89       | 0.020(.163)        | 0.038(.169)        |
| DorsalAttn-rhInferiorParietal              | 39         | -43       | 40        | 0.144        | 0.506        | 1.46        | -1.76       | 0.079(.220)        | 0.096(.212)        |
| DorsalAttn-rhMiddleFrontal                 | 37         | 38        | 13        | 0.458        | 0.719        | 0.74        | -2.53       | 0.053(.237)        | 0.062(.227)        |
| DorsalAttn-rhTriangularInferiorFrontal     | 48         | 38        | 2         | 0.823        | 0.94         | -0.22       | -2.77       | -0.046(.302)       | -0.049(.289)       |
| DorsalAttn-rhSuperiorParietal              | 23         | -66       | 52        | 0.367        | 0.65         | 0.9         | -2.41       | 0.005(.208)        | 0.015(.204)        |
| DorsalAttn-rhMiddleOccipital               | 32         | -64       | 34        | 0.027        | 0.385        | 2.21        | -0.39       | 0.044(.225)        | 0.070(.214)        |
| DorsalAttn-rhInferiorParietal              | 34         | -48       | 49        | 0.038        | 0.385        | 2.08        | -0.68       | 0.043(.201)        | 0.065(.199)        |
| DorsalAttn-rhMiddleTemporal                | 57         | -54       | -1        | 0.75         | 0.891        | -0.32       | -2.75       | 0.013(.206)        | 0.010(.214)        |
| DorsalAttn-rhPrecentral                    | 47         | 2         | 38        | 0.489        | 0.737        | 0.69        | -2.57       | 0.059(.237)        | 0.068(.221)        |
| DorsalAttn-rhOpercularInferiorFrontal      | 47         | 8         | 19        | 0.16         | 0.506        | 1.41        | -1.83       | 0.034(.202)        | 0.048(.191)        |
| <b>FrontoParietal-lhMiddleFrontal</b>      | <b>-38</b> | <b>49</b> | <b>10</b> | <b>0.002</b> | <b>0.214</b> | <b>3.06</b> | <b>1.82</b> | <b>0.003(.280)</b> | <b>0.048(.273)</b> |
| FrontoParietal-lhInferiorTemporal          | -56        | -48       | -9        | 0.435        | 0.71         | 0.78        | -2.48       | 0.035(.238)        | 0.045(.234)        |
| FrontoParietal-lhMedialSuperiorFrontal     | -6         | 29        | 44        | 0.085        | 0.482        | 1.72        | -1.34       | 0.010(.173)        | 0.027(.177)        |
| FrontoParietal-lhOrbitalMiddleFrontal      | -40        | 50        | -5        | 0.017        | 0.358        | 2.4         | 0.08        | -0.032(.363)       | 0.014(.328)        |
| FrontoParietal-lhAngular                   | -34        | -61       | 42        | 0.097        | 0.482        | 1.66        | -1.45       | 0.073(.223)        | 0.093(.224)        |
| FrontoParietal-lhOpercularInferiorFrontal  | -43        | 19        | 34        | 0.718        | 0.887        | 0.36        | -2.75       | 0.024(.253)        | 0.029(.254)        |
| FrontoParietal-lhTriangularInferiorFrontal | -40        | 24        | 23        | 0.531        | 0.749        | 0.63        | -2.62       | 0.000(.246)        | 0.009(.240)        |
| FrontoParietal-lhSuperiorFrontal           | -21        | 63        | 2         | 0.324        | 0.642        | 0.99        | -2.29       | 0.028(.321)        | 0.045(.305)        |
| FrontoParietal-lhMiddleFrontal             | -29        | 51        | 10        | 0.041        | 0.385        | 2.04        | -0.73       | 0.024(.284)        | 0.055(.278)        |
| FrontoParietal-rhSupraMarginal             | 48         | -42       | 42        | 0.117        | 0.506        | 1.57        | -1.6        | 0.085(.216)        | 0.102(.200)        |
| FrontoParietal-rhMiddleFrontal             | 38         | 46        | 8         | 0.223        | 0.569        | 1.22        | -2.07       | 0.037(.273)        | 0.055(.260)        |

|                                                |     |     |     |       |       |       |       |              |               |
|------------------------------------------------|-----|-----|-----|-------|-------|-------|-------|--------------|---------------|
| FrontoParietal-<br>rhInferiorTemporal          | 60  | -41 | -11 | 0.268 | 0.594 | 1.11  | -2.18 | 0.040(.249)  | 0.055(.244)   |
| FrontoParietal-<br>rhSupplementaryMotor        | 7   | 26  | 47  | 0.084 | 0.482 | 1.73  | -1.33 | 0.054(.185)  | 0.071(.181)   |
| FrontoParietal-<br>rhOrbitalInferiorFrontal    | 43  | 48  | -5  | 0.953 | 0.983 | 0.06  | -2.74 | 0.028(.325)  | 0.029(.306)   |
| FrontoParietal-<br>rhInferiorParietal          | 42  | -54 | 44  | 0.181 | 0.521 | 1.34  | -1.92 | 0.072(.229)  | 0.089(.233)   |
| FrontoParietal-rhAngular                       | 36  | -57 | 45  | 0.025 | 0.385 | 2.25  | -0.31 | 0.073(.247)  | 0.104(.257)   |
| FrontoParietal-<br>rhMiddleFrontal             | 38  | 29  | 36  | 0.064 | 0.44  | 1.85  | -1.1  | 0.022(.211)  | 0.043(.207)   |
| FrontoParietal-<br>rhTriangularInferiorFrontal | 42  | 29  | 22  | 0.044 | 0.385 | 2.02  | -0.79 | 0.035(.249)  | 0.062(.249)   |
| FrontoParietal-<br>rhTriangularInferiorFrontal | 39  | 19  | 26  | 0.946 | 0.983 | -0.07 | -2.8  | 0.013(.258)  | 0.012(.261)   |
| FrontoParietal-<br>rhOrbitalSuperiorFrontal    | 28  | 57  | -5  | 0.163 | 0.506 | 1.4   | -1.8  | 0.016(.368)  | 0.044(.349)   |
| FrontoParietal-<br>rhSuperiorFrontal           | 24  | 59  | 5   | 0.257 | 0.594 | 1.13  | -2.15 | 0.026(.308)  | 0.044(.280)   |
| FrontoParietal-<br>rhSuperiorFrontal           | 31  | 52  | 10  | 0.024 | 0.385 | 2.26  | -0.27 | 0.023(.289)  | 0.058(.285)   |
| FrontoParietal-<br>rhMiddleFrontal             | 42  | 20  | 48  | 0.257 | 0.594 | 1.13  | -2.17 | 0.016(.179)  | 0.027(.176)   |
| FrontoParietal-<br>rhMiddleFrontal             | 39  | 10  | 43  | 0.922 | 0.983 | -0.1  | -2.8  | 0.014(.227)  | 0.012(.215)   |
| None-<br>lhSuperiorPoleTemporal                | -29 | 5   | -27 | 0.092 | 0.482 | -1.69 | -1.38 | 0.004(.281)  | -0.022(.269)  |
| None-lhParaHippocampal                         | -29 | -36 | -8  | 0.258 | 0.594 | -1.13 | -2.17 | 0.031(.197)  | 0.019(.180)   |
| None-lhLingual                                 | -18 | -39 | -1  | 0.838 | 0.954 | -0.2  | -2.78 | 0.021(.235)  | 0.019(.232)   |
| None-<br>lhMiddlePoleTemporal                  | -34 | 17  | -32 | 0.699 | 0.876 | -0.39 | -2.7  | -0.025(.230) | -0.029(.209)  |
| None-<br>lhOrbitalSuperiorFrontal              | -23 | 61  | -7  | 0.874 | 0.965 | 0.16  | -2.74 | 0.035(.510)  | 0.040(.492)   |
| None-lhAmygdala                                | -32 | 3   | -17 | 0.515 | 0.749 | -0.65 | -2.57 | 0.022(.354)  | 0.009(.362)   |
| None-<br>lhOrbitalInferiorFrontal              | -35 | 36  | -10 | 0.1   | 0.482 | -1.65 | -1.45 | -0.060(.331) | -0.089(.318)  |
| None-<br>lhOrbitalMiddleFrontal                | -22 | 32  | -14 | 0.731 | 0.887 | 0.34  | -2.73 | -0.007(.268) | -0.002(.263)  |
| None-<br>lhOrbitalSuperiorFrontal              | -24 | 52  | -13 | 0.693 | 0.876 | 0.39  | -2.69 | 0.056(.430)  | 0.065(.408)   |
| None-<br>lhOrbitalSuperiorFrontal              | -17 | 47  | -18 | 0.173 | 0.511 | 1.36  | -1.85 | 0.016(.519)  | 0.054(.501)   |
| None-<br>lhOrbitalSuperiorFrontal              | -13 | 24  | -16 | 0.501 | 0.745 | -0.67 | -2.56 | 0.037(.482)  | 0.019(.491)   |
| None-lhRectus                                  | -9  | 46  | -21 | 0.377 | 0.656 | -0.88 | -2.38 | 0.001(1.346) | -0.064(1.265) |
| None-lhRectus                                  | -2  | 34  | -26 | 0.125 | 0.506 | 1.54  | -1.63 | 0.194(1.590) | -0.068(1.474) |
| None-lhInferiorTemporal                        | -53 | -13 | -29 | 0.145 | 0.506 | 1.46  | -1.72 | -0.063(.553) | -0.022(.493)  |
| None-lhInferiorTemporal                        | -45 | 9   | -37 | 0.67  | 0.859 | -0.43 | -2.69 | -0.047(.197) | -0.052(.196)  |
| None-lhInferiorTemporal                        | -55 | -40 | -16 | 0.339 | 0.643 | 0.96  | -2.32 | 0.045(.330)  | 0.062(.317)   |

|                                   |     |     |     |       |       |       |       |              |               |
|-----------------------------------|-----|-----|-----|-------|-------|-------|-------|--------------|---------------|
| None-lhFusiform                   | -32 | -4  | -45 | 0.589 | 0.793 | -0.54 | -2.61 | -0.067(.447) | -0.080(.403)  |
| None-lhInferiorTemporal           | -39 | -13 | -27 | 0.59  | 0.793 | -0.54 | -2.62 | -0.044(.278) | -0.052(.258)  |
| None-lhParaHippocampal            | -20 | -13 | -24 | 0.324 | 0.642 | 0.99  | -2.3  | -0.014(.282) | 0.001(.283)   |
| None-lhParaHippocampal            | -22 | -22 | -17 | 0.54  | 0.754 | -0.61 | -2.61 | -0.006(.290) | -0.015(.276)  |
| None-lhSuperiorPoleTemporal       | -51 | 7   | -20 | 0.481 | 0.736 | -0.71 | -2.55 | -0.047(.197) | -0.054(.182)  |
| None-rhSuperiorPoleTemporal       | 32  | 14  | -30 | 0.419 | 0.703 | -0.81 | -2.45 | 0.002(.251)  | -0.009(.232)  |
| None-rhParaHippocampal            | 25  | -36 | -5  | 0.732 | 0.887 | 0.34  | -2.75 | 0.031(.218)  | 0.035(.204)   |
| None-rhParaHippocampal            | 19  | -30 | -10 | 0.649 | 0.843 | 0.45  | -2.68 | -0.025(.372) | -0.016(.361)  |
| None-rhRectus                     | 3   | 19  | -23 | 0.37  | 0.651 | -0.9  | -2.38 | 0.035(.742)  | -0.001(.719)  |
| None-rhOrbitalInferiorFrontal     | 35  | 37  | -8  | 0.335 | 0.643 | -0.96 | -2.33 | -0.054(.278) | -0.069(.271)  |
| None-rhOlfactory                  | 25  | 9   | -16 | 0.099 | 0.482 | 1.65  | -1.45 | -0.005(.352) | 0.025(.327)   |
| None-rhOrbitalSuperiorFrontal     | 21  | 30  | -15 | 0.897 | 0.97  | 0.13  | -2.78 | 0.004(.289)  | 0.006(.270)   |
| None-rhOrbitalSuperiorFrontal     | 22  | 51  | -14 | 0.597 | 0.797 | 0.53  | -2.63 | 0.057(.429)  | 0.069(.416)   |
| None-rhOrbitalSuperiorFrontal     | 12  | 26  | -25 | 0.642 | 0.837 | 0.46  | -2.67 | 0.028(1.274) | 0.059(1.197)  |
| None-rhRectus                     | 14  | 20  | -15 | 0.851 | 0.957 | -0.19 | -2.78 | 0.070(.400)  | 0.066(.376)   |
| None-rhRectus                     | 11  | 39  | -20 | 0.34  | 0.643 | 0.96  | -2.32 | -0.049(.831) | -0.005(.817)  |
| None-lhRectus                     | 2   | 39  | -26 | 0.48  | 0.736 | 0.71  | -2.53 | 0.227(1.510) | -0.172(1.388) |
| None-rhInferiorTemporal           | 62  | -26 | -16 | 0.136 | 0.506 | 1.49  | -1.66 | 0.035(.385)  | 0.068(.386)   |
| None-rhInferiorTemporal           | 55  | -8  | -27 | 0.108 | 0.506 | 1.61  | -1.48 | -0.076(.386) | -0.041(.377)  |
| None-rhMiddlePoleTemporal         | 45  | 14  | -30 | 0.453 | 0.718 | -0.75 | -2.5  | -0.028(.184) | -0.035(.172)  |
| None-rhParaHippocampal            | 20  | -21 | -22 | 0.519 | 0.749 | 0.65  | -2.58 | -0.016(.319) | -0.005(.294)  |
| None-rhFusiform                   | 28  | 0   | -37 | 0.049 | 0.394 | -1.97 | -0.85 | 0.071(.575)  | 0.012(.521)   |
| None-rhInferiorTemporal           | 37  | 8   | -38 | 0.932 | 0.983 | -0.09 | -2.77 | -0.025(.274) | -0.026(.259)  |
| None-rhInferiorTemporal           | 54  | -10 | -37 | 0.904 | 0.974 | 0.12  | -2.73 | -0.025(.455) | -0.022(.435)  |
| None-rhInferiorTemporal           | 56  | -27 | -19 | 0.329 | 0.643 | 0.98  | -2.31 | 0.026(.707)  | 0.062(.655)   |
| None-rhFusiform                   | 31  | 2   | -46 | 0.195 | 0.538 | -1.29 | -1.93 | 0.033(.535)  | -0.003(.496)  |
| None-rhFusiform                   | 40  | -12 | -30 | 0.127 | 0.506 | 1.53  | -1.61 | -0.027(.300) | -0.002(.293)  |
| None-rhFusiform                   | 32  | -9  | -36 | 0.859 | 0.957 | -0.18 | -2.73 | 0.013(.390)  | 0.009(.388)   |
| None-rhInferiorTemporal           | 43  | -24 | -21 | 0.849 | 0.957 | -0.19 | -2.75 | -0.006(.390) | -0.010(.349)  |
| None-rhParaHippocampal            | 20  | -11 | -25 | 1     | 1     | 0     | -2.77 | -0.016(.290) | -0.016(.269)  |
| None-rhParaHippocampal            | 30  | -19 | -19 | 0.495 | 0.739 | -0.68 | -2.57 | 0.003(.280)  | -0.008(.294)  |
| RetrosplenialTemporal-lhCalcarine | -14 | -58 | 18  | 0.112 | 0.506 | -1.59 | -1.56 | -0.056(.220) | -0.076(.228)  |
| RetrosplenialTemporal-lhLingual   | -9  | -50 | 4   | 0.941 | 0.983 | -0.07 | -2.8  | -0.061(.268) | -0.062(.262)  |
| RetrosplenialTemporal-lhFusiform  | -34 | -33 | -15 | 0.133 | 0.506 | -1.5  | -1.68 | -0.032(.193) | -0.047(.187)  |
| RetrosplenialTemporal-lhFusiform  | -22 | -37 | -15 | 0.928 | 0.983 | 0.09  | -2.8  | -0.043(.224) | -0.042(.215)  |
| RetrosplenialTemporal-rhCalcarine | 14  | -54 | 11  | 0.486 | 0.737 | -0.7  | -2.57 | -0.064(.230) | -0.072(.224)  |
| RetrosplenialTemporal-rhFusiform  | 35  | -36 | -12 | 0.195 | 0.538 | -1.3  | -1.98 | -0.039(.232) | -0.055(.229)  |

|                                  |           |            |           |              |              |             |             |                     |                    |
|----------------------------------|-----------|------------|-----------|--------------|--------------|-------------|-------------|---------------------|--------------------|
| RetrosplenialTemporal-rhFusiform | 35        | -24        | -20       | 0.435        | 0.71         | 0.78        | -2.49       | -0.030(.215)        | -0.020(.220)       |
| RetrosplenialTemporal-rhFusiform | 24        | -36        | -13       | 0.433        | 0.71         | -0.78       | -2.49       | -0.041(.229)        | -0.051(.227)       |
| SaliencelhAnteriorCingulum       | -10       | 34         | 22        | 0.044        | 0.385        | 2.02        | -0.79       | 0.048(.224)         | 0.072(.220)        |
| SaliencelhInsula                 | -32       | 17         | -8        | 0.214        | 0.559        | 1.24        | -2.04       | 0.088(.258)         | 0.106(.267)        |
| SaliencerhAnteriorCingulum       | 8         | 35         | 23        | 0.023        | 0.385        | 2.28        | -0.23       | 0.053(.232)         | 0.082(.233)        |
| SaliencerhInsula                 | 31        | 23         | -5        | 0.134        | 0.506        | 1.5         | -1.7        | 0.118(.279)         | 0.140(.271)        |
| SMhand-lhSuperiorParietal        | -19       | -49        | 65        | 0.157        | 0.506        | 1.42        | -1.81       | -0.026(.177)        | -0.013(.166)       |
| SMhand-lhPrecuneus               | -11       | -48        | 60        | 0.242        | 0.589        | 1.17        | -2.12       | -0.019(.208)        | -0.005(.218)       |
| SMhand-lhLobuleParacentral       | -16       | -33        | 66        | 0.157        | 0.506        | 1.42        | -1.82       | 0.008(.270)         | 0.028(.259)        |
| SMhand-lhLobuleParacentral       | -11       | -29        | 70        | 0.44         | 0.714        | 0.77        | -2.5        | 0.010(.180)         | 0.018(.172)        |
| SMhand-lhLobuleParacentral       | -7        | -20        | 74        | 0.952        | 0.983        | 0.06        | -2.78       | -0.002(.231)        | -0.001(.210)       |
| SMhand-lhPrecuneus               | -11       | -41        | 65        | 0.261        | 0.594        | 1.12        | -2.17       | -0.026(.195)        | -0.015(.183)       |
| SMhand-lhLobuleParacentral       | -5        | -28        | 60        | 0.074        | 0.482        | 1.79        | -1.23       | -0.023(.186)        | -0.006(.179)       |
| SMhand-lhMiddleCingulum          | -5        | -16        | 49        | 0.087        | 0.482        | 1.71        | -1.36       | 0.008(.201)         | 0.027(.201)        |
| SMhand-lhPostcentral             | -36       | -30        | 54        | 0.235        | 0.579        | 1.19        | -2.11       | 0.049(.278)         | 0.067(.267)        |
| SMhand-lhPrecentral              | -37       | -23        | 62        | 0.073        | 0.482        | 1.8         | -1.2        | 0.038(.181)         | 0.056(.179)        |
| SMhand-lhPrecentral              | -20       | -25        | 64        | 0.122        | 0.506        | 1.55        | -1.6        | 0.003(.177)         | 0.018(.183)        |
| SMhand-lhPrecentral              | -23       | -14        | 64        | 0.398        | 0.67         | 0.85        | -2.45       | 0.034(.168)         | 0.042(.161)        |
| SMhand-lhLobuleParacentral       | -17       | -9         | 68        | 0.934        | 0.983        | -0.08       | -2.79       | 0.032(.144)         | 0.031(.146)        |
| SMhand-lhSuperiorParietal        | -29       | -45        | 62        | 0.187        | 0.528        | 1.32        | -1.95       | -0.013(.185)        | -0.000(.180)       |
| SMhand-lhInferiorParietal        | -54       | -21        | 41        | 0.048        | 0.394        | 1.98        | -0.88       | -0.006(.214)        | 0.016(.205)        |
| SMhand-lhPostcentral             | -35       | -35        | 42        | 0.163        | 0.506        | 1.4         | -1.85       | 0.003(.209)         | 0.018(.196)        |
| SMhand-lhPostcentral             | -28       | -37        | 61        | 0.013        | 0.349        | 2.49        | 0.25        | -0.019(.169)        | 0.003(.166)        |
| SMhand-lhPostcentral             | -47       | -31        | 55        | 0.062        | 0.438        | 1.87        | -1.08       | 0.019(.217)         | 0.040(.204)        |
| SMhand-rhSuperiorParietal        | 21        | -48        | 66        | 0.627        | 0.826        | 0.49        | -2.69       | -0.027(.165)        | -0.022(.168)       |
| SMhand-rhPostcentral             | 16        | -33        | 68        | 0.526        | 0.749        | 0.63        | -2.6        | -0.001(.262)        | 0.008(.255)        |
| SMhand-rhLobuleParacentral       | 5         | -27        | 65        | 0.97         | 0.987        | 0.04        | -2.79       | -0.015(.176)        | -0.015(.182)       |
| SMhand-rhPostcentral             | 12        | -41        | 67        | 0.202        | 0.548        | 1.28        | -1.99       | -0.025(.180)        | -0.013(.182)       |
| SMhand-rhSupplementaryMotor      | 5         | -17        | 52        | 0.803        | 0.928        | 0.25        | -2.77       | -0.013(.222)        | -0.010(.215)       |
| SMhand-rhMiddleCingulum          | 7         | -8         | 51        | 0.484        | 0.737        | 0.7         | -2.56       | 0.019(.200)         | 0.026(.196)        |
| SMhand-rhPrecentral              | 38        | -22        | 60        | 0.969        | 0.987        | 0.04        | -2.79       | 0.011(.156)         | 0.011(.157)        |
| SMhand-rhPrecentral              | 20        | -25        | 65        | 0.039        | 0.385        | 2.07        | -0.69       | -0.011(.177)        | 0.009(.180)        |
| <b>SMhand-rhPrecentral</b>       | <b>12</b> | <b>-28</b> | <b>70</b> | <b>0.003</b> | <b>0.214</b> | <b>2.95</b> | <b>1.51</b> | <b>-0.011(.196)</b> | <b>0.019(.183)</b> |
| SMhand-rhPrecentral              | 29        | -14        | 64        | 0.582        | 0.788        | -0.55       | -2.65       | 0.026(.188)         | 0.021(.181)        |
| SMhand-rhPrecentral              | 17        | -17        | 71        | 0.704        | 0.876        | -0.38       | -2.72       | 0.030(.173)         | 0.027(.174)        |

|                                         |     |     |     |       |       |       |       |              |              |
|-----------------------------------------|-----|-----|-----|-------|-------|-------|-------|--------------|--------------|
| SMhand-rhSuperiorFrontal                | 21  | -6  | 65  | 0.1   | 0.482 | 1.65  | -1.47 | 0.012(.153)  | 0.026(.147)  |
| SMhand-rhPostcentral                    | 30  | -42 | 60  | 0.084 | 0.482 | 1.73  | -1.33 | -0.041(.192) | -0.022(.195) |
| SMhand-rhInferiorParietal               | 34  | -41 | 52  | 0.518 | 0.749 | 0.65  | -2.6  | -0.023(.226) | -0.015(.223) |
| SMhand-rhSupraMarginal                  | 40  | -32 | 40  | 0.119 | 0.506 | 1.56  | -1.61 | -0.008(.193) | 0.007(.186)  |
| SMhand-rhPostcentral                    | 28  | -35 | 63  | 0.17  | 0.508 | 1.37  | -1.87 | -0.030(.163) | -0.018(.161) |
| SMhand-rhPostcentral                    | 39  | -35 | 58  | 0.367 | 0.65  | 0.9   | -2.4  | -0.018(.201) | -0.009(.189) |
| SMhand-rhPostcentral                    | 37  | -26 | 51  | 0.889 | 0.969 | 0.14  | -2.78 | -0.001(.230) | 0.001(.225)  |
| SMhand-rhPostcentral                    | 49  | -26 | 52  | 0.09  | 0.482 | 1.7   | -1.38 | -0.020(.198) | -0.001(.199) |
| SMhand-rhSupraMarginal                  | 53  | -23 | 39  | 0.011 | 0.349 | 2.54  | 0.39  | -0.022(.197) | 0.005(.192)  |
| SMmouth-lhPostcentral                   | -52 | -8  | 38  | 0.457 | 0.719 | -0.74 | -2.53 | 0.013(.193)  | 0.005(.190)  |
| SMmouth-lhPostcentral                   | -42 | -12 | 50  | 0.249 | 0.594 | 1.15  | -2.14 | 0.037(.188)  | 0.048(.185)  |
| SMmouth-lhPostcentral                   | -52 | -12 | 30  | 0.492 | 0.737 | -0.69 | -2.58 | -0.007(.292) | -0.018(.284) |
| SMmouth-lhPostcentral                   | -46 | -18 | 53  | 0.268 | 0.594 | 1.11  | -2.19 | 0.050(.263)  | 0.066(.278)  |
| SMmouth-rhPostcentral                   | 50  | -7  | 36  | 0.474 | 0.735 | -0.72 | -2.55 | 0.016(.207)  | 0.008(.208)  |
| SMmouth-rhPrecentral                    | 42  | -11 | 47  | 0.512 | 0.749 | 0.66  | -2.59 | 0.033(.179)  | 0.040(.176)  |
| SMmouth-rhPostcentral                   | 54  | -8  | 26  | 0.379 | 0.656 | -0.88 | -2.42 | -0.013(.284) | -0.027(.282) |
| SMmouth-rhPrecentral                    | 48  | -15 | 49  | 0.355 | 0.65  | -0.93 | -2.37 | 0.026(.262)  | 0.013(.258)  |
| Subcortical-lhCerebellum                | NA  | NA  | NA  | 0.492 | 0.737 | 0.69  | -2.57 | 0.048(.275)  | 0.058(.255)  |
| Subcortical-lhThalamus                  | NA  | NA  | NA  | 0.448 | 0.714 | 0.76  | -2.53 | 0.038(.154)  | 0.044(.145)  |
| Subcortical-lhCaudate                   | NA  | NA  | NA  | 0.178 | 0.518 | 1.35  | -1.9  | 0.090(.229)  | 0.106(.215)  |
| Subcortical-lhPutamen                   | NA  | NA  | NA  | 0.291 | 0.621 | 1.06  | -2.25 | 0.066(.184)  | 0.076(.178)  |
| Subcortical-lhPallidum                  | NA  | NA  | NA  | 0.967 | 0.987 | 0.04  | -2.79 | 0.058(.162)  | 0.058(.151)  |
| Subcortical-brainStem                   | NA  | NA  | NA  | 0.445 | 0.714 | 0.76  | -2.5  | 0.033(.179)  | 0.040(.176)  |
| Subcortical-lhHippocampus               | NA  | NA  | NA  | 0.629 | 0.826 | -0.48 | -2.68 | 0.000(.151)  | -0.003(.147) |
| Subcortical-lhAmygdala                  | NA  | NA  | NA  | 0.531 | 0.749 | -0.63 | -2.59 | -0.021(.188) | -0.027(.178) |
| Subcortical-lhAccumbens                 | NA  | NA  | NA  | 0.629 | 0.826 | 0.48  | -2.68 | 0.107(.239)  | 0.113(.236)  |
| Subcortical-lhVentraldc                 | NA  | NA  | NA  | 0.281 | 0.615 | 1.08  | -2.22 | 0.056(.197)  | 0.068(.188)  |
| Subcortical-rhCerebellum                | NA  | NA  | NA  | 0.79  | 0.924 | -0.27 | -2.76 | 0.052(.264)  | 0.048(.247)  |
| Subcortical-rhThalamus                  | NA  | NA  | NA  | 0.141 | 0.506 | 1.47  | -1.73 | 0.046(.161)  | 0.059(.159)  |
| Subcortical-rhCaudate                   | NA  | NA  | NA  | 0.014 | 0.349 | 2.46  | 0.18  | 0.094(.238)  | 0.124(.227)  |
| Subcortical-rhPutamen                   | NA  | NA  | NA  | 0.186 | 0.528 | 1.32  | -1.94 | 0.069(.186)  | 0.082(.188)  |
| Subcortical-rhPallidum                  | NA  | NA  | NA  | 0.175 | 0.514 | 1.36  | -1.89 | 0.048(.164)  | 0.060(.151)  |
| Subcortical-rhHippocampus               | NA  | NA  | NA  | 0.476 | 0.735 | -0.71 | -2.54 | 0.008(.150)  | 0.002(.152)  |
| Subcortical-rhAmygdala                  | NA  | NA  | NA  | 0.159 | 0.506 | -1.41 | -1.81 | -0.005(.202) | -0.020(.192) |
| Subcortical-rhAccumbens                 | NA  | NA  | NA  | 0.308 | 0.629 | 1.02  | -2.28 | 0.088(.230)  | 0.101(.228)  |
| Subcortical-rhVentraldc                 | NA  | NA  | NA  | 0.448 | 0.714 | 0.76  | -2.51 | 0.061(.191)  | 0.069(.189)  |
| VentralAttn-lhSupplementaryMotor        | -4  | 12  | 65  | 0.153 | 0.506 | 1.43  | -1.79 | 0.002(.164)  | 0.014(.162)  |
| VentralAttn-lhMiddleTemporal            | -45 | -54 | 15  | 0.955 | 0.983 | 0.06  | -2.8  | -0.021(.228) | -0.020(.220) |
| VentralAttn-lhMiddleTemporal            | -52 | -56 | 11  | 0.997 | 1     | 0     | -2.8  | -0.029(.228) | -0.029(.221) |
| VentralAttn-lhMiddleTemporal            | -48 | -40 | 2   | 0.742 | 0.891 | 0.33  | -2.75 | -0.053(.183) | -0.050(.180) |
| VentralAttn-lhTriangularInferiorFrontal | -50 | 21  | 11  | 0.84  | 0.954 | 0.2   | -2.78 | -0.068(.231) | -0.065(.229) |
| VentralAttn-lhOrbitalInferiorFrontal    | -47 | 39  | -9  | 0.389 | 0.662 | -0.86 | -2.42 | -0.087(.333) | -0.103(.325) |
| VentralAttn-lhInsula                    | -29 | 20  | -14 | 0.704 | 0.876 | -0.38 | -2.73 | -0.012(.217) | -0.016(.197) |

|                                         |           |            |           |              |              |             |             |                    |                    |
|-----------------------------------------|-----------|------------|-----------|--------------|--------------|-------------|-------------|--------------------|--------------------|
| VentralAttn-lhOrbitalInferiorFrontal    | -44       | 33         | -7        | 0.565        | 0.777        | -0.57       | -2.62       | -0.082(.264)       | -0.091(.268)       |
| VentralAttn-lhTriangularInferiorFrontal | -45       | 29         | 1         | 0.083        | 0.482        | -1.74       | -1.3        | -0.081(.286)       | -0.107(.271)       |
| VentralAttn-lhPrecentral                | -39       | 5          | 48        | 0.309        | 0.629        | 1.02        | -2.29       | -0.014(.201)       | -0.003(.199)       |
| VentralAttn-lhMiddleTemporal            | -59       | -18        | -3        | 0.298        | 0.628        | -1.04       | -2.26       | -0.031(.233)       | -0.044(.225)       |
| VentralAttn-rhMiddleTemporal            | 58        | -45        | 9         | 0.344        | 0.644        | -0.95       | -2.35       | -0.012(.205)       | -0.023(.209)       |
| VentralAttn-rhMiddleTemporal            | 61        | -39        | 2         | 0.152        | 0.506        | 1.43        | -1.79       | -0.056(.214)       | -0.039(.212)       |
| VentralAttn-rhSuperiorTemporal          | 57        | -17        | -3        | 0.888        | 0.969        | 0.14        | -2.79       | -0.011(.232)       | -0.009(.207)       |
| VentralAttn-rhSuperiorTemporal          | 47        | -40        | 13        | 0.729        | 0.887        | -0.35       | -2.74       | 0.004(.218)        | -0.000(.209)       |
| VentralAttn-rhMiddleTemporal            | 46        | -37        | 3         | 0.655        | 0.847        | 0.45        | -2.71       | -0.025(.214)       | -0.020(.205)       |
| VentralAttn-rhSuperiorTemporal          | 48        | -26        | 0         | 0.988        | 0.996        | -0.02       | -2.81       | -0.012(.187)       | -0.012(.187)       |
| VentralAttn-rhTriangularInferiorFrontal | 52        | 24         | 10        | 0.262        | 0.594        | 1.12        | -2.18       | -0.047(.248)       | -0.032(.246)       |
| VentralAttn-rhOrbitalInferiorFrontal    | 48        | 38         | -9        | 0.234        | 0.579        | -1.19       | -2.08       | -0.060(.333)       | -0.082(.319)       |
| VentralAttn-rhOrbitalInferiorFrontal    | 45        | 31         | -6        | 0.114        | 0.506        | -1.58       | -1.55       | -0.023(.236)       | -0.042(.221)       |
| VentralAttn-rhInsula                    | 27        | 20         | -15       | 0.353        | 0.65         | 0.93        | -2.36       | 0.024(.216)        | 0.034(.204)        |
| VentralAttn-rhSuperiorTemporal          | 57        | -6         | -8        | 0.563        | 0.777        | 0.58        | -2.63       | -0.036(.215)       | -0.029(.211)       |
| VentralAttn-rhMiddleTemporal            | 47        | -22        | -8        | 0.381        | 0.656        | 0.88        | -2.42       | -0.030(.274)       | -0.018(.257)       |
| Visual-lhSuperiorOccipital              | -18       | -86        | 22        | 0.337        | 0.643        | 0.96        | -2.35       | -0.037(.226)       | -0.025(.222)       |
| Visual-lhLingual                        | -17       | -60        | -5        | 0.308        | 0.629        | 1.02        | -2.29       | -0.006(.251)       | 0.007(.239)        |
| Visual-lhCalcarine                      | -11       | -83        | 4         | 0.228        | 0.569        | 1.21        | -2.09       | 0.023(.365)        | 0.045(.335)        |
| Visual-lhLingual                        | -22       | -58        | 2         | 0.767        | 0.899        | 0.3         | -2.76       | -0.018(.389)       | -0.012(.357)       |
| Visual-lhLingual                        | -10       | -58        | 3         | 0.866        | 0.962        | -0.17       | -2.77       | -0.083(.547)       | -0.088(.514)       |
| Visual-lhLingual                        | -17       | -46        | -4        | 0.264        | 0.594        | 1.12        | -2.18       | -0.031(.318)       | -0.011(.314)       |
| Visual-lhSuperiorOccipital              | -14       | -77        | 27        | 0.038        | 0.385        | 2.08        | -0.67       | -0.025(.225)       | -0.001(.212)       |
| Visual-lhMiddleOccipital                | -31       | -84        | 9         | 0.856        | 0.957        | 0.18        | -2.79       | -0.060(.245)       | -0.057(.249)       |
| Visual-lhMiddleOccipital                | -34       | -87        | 0         | 0.459        | 0.719        | 0.74        | -2.52       | -0.047(.280)       | -0.036(.276)       |
| Visual-lhMiddleOccipital                | -43       | -68        | 10        | 0.702        | 0.876        | 0.38        | -2.73       | -0.006(.195)       | -0.002(.195)       |
| Visual-lhFusiform                       | -29       | -59        | -9        | 0.142        | 0.506        | 1.47        | -1.74       | -0.014(.232)       | 0.004(.234)        |
| Visual-lhFusiform                       | -34       | -64        | -16       | 0.362        | 0.65         | 0.91        | -2.38       | 0.025(.298)        | 0.040(.296)        |
| Visual-lhFusiform                       | -34       | -44        | -22       | 0.809        | 0.93         | 0.24        | -2.76       | -0.018(.265)       | -0.015(.241)       |
| Visual-lhCuneus                         | -5        | -88        | 19        | 0.32         | 0.642        | 0.99        | -2.31       | 0.016(.250)        | 0.029(.242)        |
| <b>Visual-lhLingual</b>                 | <b>-9</b> | <b>-78</b> | <b>-4</b> | <b>0.003</b> | <b>0.214</b> | <b>3.02</b> | <b>1.71</b> | <b>0.016(.336)</b> | <b>0.068(.318)</b> |
| Visual-lhInferiorOccipital              | -41       | -72        | -6        | 0.114        | 0.506        | 1.58        | -1.57       | -0.045(.232)       | -0.026(.230)       |
| Visual-lhInferiorOccipital              | -25       | -97        | -8        | 0.325        | 0.642        | 0.98        | -2.31       | -0.049(.465)       | -0.025(.437)       |
| Visual-lhLingual                        | -23       | -82        | -12       | 0.169        | 0.508        | 1.38        | -1.87       | 0.057(.306)        | 0.080(.310)        |
| Visual-rhSuperiorOccipital              | 22        | -85        | 24        | 0.804        | 0.928        | 0.25        | -2.77       | -0.033(.240)       | -0.030(.229)       |
| Visual-rhFusiform                       | 22        | -46        | -10       | 0.607        | 0.807        | -0.51       | -2.67       | -0.000(.250)       | -0.007(.239)       |
| Visual-rhCalcarine                      | 16        | -74        | 9         | 0.858        | 0.957        | 0.18        | -2.8        | 0.037(.359)        | 0.040(.336)        |

|                           |           |            |           |              |              |             |             |                     |                    |
|---------------------------|-----------|------------|-----------|--------------|--------------|-------------|-------------|---------------------|--------------------|
| Visual-rhLingual          | 20        | -45        | -4        | 0.994        | 1            | 0.01        | -2.8        | -0.014(.320)        | -0.014(.308)       |
| Visual-rhLingual          | 16        | -60        | -5        | 0.154        | 0.506        | 1.42        | -1.8        | -0.005(.279)        | 0.016(.268)        |
| Visual-rhInferiorParietal | 27        | -55        | 54        | 0.212        | 0.558        | 1.25        | -2.04       | 0.004(.207)         | 0.017(.198)        |
| <b>Visual-rhCuneus</b>    | <b>18</b> | <b>-78</b> | <b>34</b> | <b>0.004</b> | <b>0.218</b> | <b>2.86</b> | <b>1.22</b> | <b>-0.026(.228)</b> | <b>0.008(.221)</b> |
| Visual-rhCuneus           | 8         | -86        | 32        | 0.752        | 0.891        | 0.32        | -2.74       | 0.009(.282)         | 0.014(.267)        |
| Visual-rhMiddleOccipital  | 35        | -77        | 21        | 0.985        | 0.996        | -0.02       | -2.81       | -0.015(.233)        | -0.016(.217)       |
| Visual-rhMiddleOccipital  | 32        | -86        | 2         | 0.057        | 0.422        | 1.9         | -1          | 0.047(.258)         | 0.075(.270)        |
| Visual-rhMiddleTemporal   | 44        | -67        | 2         | 0.552        | 0.764        | 0.6         | -2.63       | 0.007(.189)         | 0.013(.187)        |
| Visual-rhInferiorTemporal | 47        | -52        | -12       | 0.513        | 0.749        | 0.65        | -2.59       | 0.024(.193)         | 0.030(.191)        |
| Visual-rhMiddleTemporal   | 49        | -54        | 9         | 0.227        | 0.569        | 1.21        | -2.09       | -0.014(.194)        | -0.001(.195)       |
| Visual-rhFusiform         | 31        | -46        | -6        | 0.671        | 0.859        | -0.43       | -2.71       | -0.020(.274)        | -0.026(.264)       |
| Visual-rhFusiform         | 27        | -69        | -7        | 0.943        | 0.983        | 0.07        | -2.8        | 0.073(.254)         | 0.074(.253)        |
| Visual-rhFusiform         | 35        | -44        | -20       | 0.539        | 0.754        | 0.61        | -2.61       | 0.046(.255)         | 0.054(.249)        |
| Visual-rhCuneus           | 14        | -92        | 15        | 0.359        | 0.65         | 0.92        | -2.38       | -0.041(.276)        | -0.027(.273)       |
| Visual-rhLingual          | 10        | -74        | -2        | 0.2          | 0.545        | 1.28        | -1.99       | 0.031(.316)         | 0.052(.293)        |
| Visual-rhLingual          | 20        | -87        | -7        | 0.745        | 0.891        | -0.33       | -2.75       | 0.159(.407)         | 0.152(.393)        |
| Visual-rhCuneus           | 5         | -80        | 23        | 0.121        | 0.506        | 1.55        | -1.61       | 0.010(.291)         | 0.033(.274)        |
| Visual-rhCuneus           | 15        | -70        | 23        | 0.062        | 0.438        | 1.87        | -1.08       | -0.025(.265)        | 0.001(.254)        |

\* = qFDR < .05. Bold = qFDR < .05 or  $\ln(\text{BF}_{10}) > 1.1$ . Note that x, y and z values here refer to the Montreal Neurological Institute (MNI) coordinates at the centroid of each cortical-surface region-of-interest (ROI) of a standard MNI brain. The label for each cortical-surface ROI is based on the Automated Anatomical Labeling (AAL) algorithm<sup>2</sup> via the mni2aal R package (<https://github.com/yunshuan/label4MRI>). The label for each subcortical-volumetric ROI is based on Freesurfer' segmentation algorithm<sup>3</sup>, applied on each participant's individual brain space. Given that individual brain space was used for subcortical ROIs, their x, y and z coordinates are not given here. \* = qFDR < .05. Bold = qFDR < .05 or  $\ln(\text{BF}_{10}) > 1.1$ . The value of  $\ln(\text{BF}_{10}) > 1.1$  and  $< -1.2$  are interpreted as substantial evidence for the alternative (of there being a difference), and null hypotheses (of there being *no* difference), respectively.

**eTable 10.** Group differences between children with vs. without anhedonia during working-memory [Two-Back > Zero-Back] in the N-Back task-fMRI activation

| Name: Network-ROI             | x   | y   | z  | p     | q <sub>FDR</sub> | t     | ln(BF <sub>10</sub> ) | With Anhedonia M(SD) | Without Anhedonia M(SD) |
|-------------------------------|-----|-----|----|-------|------------------|-------|-----------------------|----------------------|-------------------------|
| Auditory-lhHeschl             | -32 | -29 | 16 | 0.151 | 0.465            | -1.44 | -1.42                 | -0.043(.205)         | -0.067(.215)            |
| Auditory-lhSupraMarginal      | -46 | -41 | 26 | 0.469 | 0.722            | 0.72  | -2.17                 | -0.085(.260)         | -0.070(.253)            |
| Auditory-lhOpercularRolandic  | -36 | -34 | 20 | 0.694 | 0.86             | -0.39 | -2.35                 | -0.078(.258)         | -0.085(.245)            |
| Auditory-lhSuperiorTemporal   | -53 | -21 | 5  | 0.034 | 0.298            | -2.12 | -0.23                 | -0.028(.201)         | -0.061(.190)            |
| Auditory-lhSuperiorTemporal   | -60 | -38 | 16 | 0.586 | 0.799            | -0.54 | -2.28                 | -0.040(.188)         | -0.048(.198)            |
| Auditory-lhSuperiorTemporal   | -59 | -30 | 11 | 0.031 | 0.279            | -2.16 | -0.14                 | -0.038(.195)         | -0.070(.180)            |
| Auditory-lhSuperiorTemporal   | -41 | -38 | 14 | 0.176 | 0.476            | -1.35 | -1.54                 | -0.045(.231)         | -0.068(.218)            |
| Auditory-lhInsula             | -34 | -22 | 10 | 0.326 | 0.604            | -0.98 | -1.93                 | -0.037(.177)         | -0.052(.192)            |
| Auditory-lhInsula             | -37 | -14 | 19 | 0.012 | 0.249            | -2.51 | 0.64                  | -0.075(.245)         | -0.122(.237)            |
| Auditory-lhOpercularRolandic  | -52 | -14 | 15 | 0.189 | 0.477            | -1.31 | -1.58                 | -0.104(.243)         | -0.131(.264)            |
| Auditory-lhSupraMarginal      | -51 | -22 | 19 | 0.224 | 0.513            | -1.22 | -1.71                 | -0.090(.210)         | -0.111(.221)            |
| Auditory-lhSuperiorTemporal   | -54 | -1  | -1 | 0.018 | 0.269            | -2.38 | 0.35                  | -0.026(.173)         | -0.058(.169)            |
| Auditory-rhInsula             | 34  | -22 | 13 | 0.899 | 0.948            | -0.13 | -2.42                 | -0.063(.214)         | -0.065(.207)            |
| Auditory-rhOpercularRolandic  | 36  | -31 | 19 | 0.107 | 0.412            | -1.61 | -1.15                 | -0.060(.226)         | -0.089(.228)            |
| Auditory-rhSuperiorTemporal   | 54  | -16 | 5  | 0.104 | 0.406            | -1.63 | -1.13                 | -0.028(.186)         | -0.052(.187)            |
| Auditory-rhSuperiorTemporal   | 59  | -39 | 15 | 0.398 | 0.664            | -0.85 | -2.07                 | -0.014(.190)         | -0.026(.183)            |
| Auditory-rhSuperiorTemporal   | 62  | -24 | 1  | 0.478 | 0.722            | -0.71 | -2.17                 | -0.043(.235)         | -0.056(.222)            |
| Auditory-rhSuperiorTemporal   | 60  | -25 | 10 | 0.122 | 0.438            | -1.55 | -1.25                 | -0.046(.190)         | -0.069(.186)            |
| Auditory-rhInsula             | 38  | -12 | 20 | 0.026 | 0.273            | -2.23 | -0.01                 | -0.098(.239)         | -0.142(.248)            |
| Auditory-rhInsula             | 37  | -10 | 12 | 0.059 | 0.314            | -1.89 | -0.69                 | -0.043(.238)         | -0.077(.227)            |
| Auditory-rhOpercularRolandic  | 61  | -2  | 11 | 0.931 | 0.972            | -0.09 | -2.42                 | -0.125(.260)         | -0.127(.259)            |
| Auditory-rhOpercularRolandic  | 54  | -14 | 17 | 0.057 | 0.314            | -1.9  | -0.66                 | -0.099(.237)         | -0.135(.242)            |
| Auditory-rhSuperiorTemporal   | 40  | -22 | 3  | 0.697 | 0.861            | 0.39  | -2.35                 | -0.122(.359)         | -0.111(.350)            |
| Auditory-rhSuperiorTemporal   | 56  | 2   | -2 | 0.205 | 0.486            | -1.27 | -1.62                 | -0.046(.162)         | -0.062(.157)            |
| CinguloOperc-lhMiddleCingulum | -17 | -36 | 43 | 0.24  | 0.524            | -1.18 | -1.75                 | -0.033(.157)         | -0.049(.167)            |
| CinguloOperc-lhMiddleCingulum | -9  | 0   | 43 | 0.794 | 0.897            | 0.26  | -2.4                  | -0.013(.168)         | -0.010(.158)            |

|                                             |            |           |            |              |              |             |             |                     |                     |
|---------------------------------------------|------------|-----------|------------|--------------|--------------|-------------|-------------|---------------------|---------------------|
| CinguloOperc-<br>lhMiddleCingulum           | -8         | 15        | 34         | 0.806        | 0.901        | 0.24        | -2.4        | 0.035(.189)         | 0.039(.183)         |
| CinguloOperc-<br>lhAnteriorCingulum         | -9         | 25        | 28         | 0.195        | 0.486        | 1.3         | -1.6        | 0.075(.269)         | 0.102(.254)         |
| CinguloOperc-<br>lhSupplementaryMotor       | -8         | -9        | 63         | 0.413        | 0.679        | -0.82       | -2.09       | -0.018(.153)        | -0.028(.151)        |
| CinguloOperc-lhPrecentral                   | -42        | -4        | 47         | 0.95         | 0.978        | 0.06        | -2.42       | 0.067(.214)         | 0.068(.226)         |
| CinguloOperc-<br>lhSupraMarginal            | -58        | -41       | 36         | 0.648        | 0.842        | 0.46        | -2.34       | 0.018(.205)         | 0.025(.209)         |
| CinguloOperc-<br>lhSuperiorTemporal         | -39        | -16       | -5         | 0.167        | 0.475        | -1.38       | -1.49       | -0.047(.197)        | -0.067(.185)        |
| <b>CinguloOperc-lhInsula</b>                | <b>-39</b> | <b>-2</b> | <b>-12</b> | <b>0.005</b> | <b>0.167</b> | <b>-2.8</b> | <b>1.39</b> | <b>-0.031(.186)</b> | <b>-0.070(.170)</b> |
| CinguloOperc-lhInsula                       | -38        | 3         | 12         | 0.344        | 0.621        | -0.95       | -1.99       | -0.024(.182)        | -0.038(.180)        |
| CinguloOperc-lhInsula                       | -37        | 1         | 6          | 0.114        | 0.432        | -1.58       | -1.21       | -0.031(.178)        | -0.053(.178)        |
| CinguloOperc-lhInsula                       | -37        | 9         | -1         | 0.19         | 0.477        | -1.31       | -1.6        | 0.020(.205)         | -0.000(.193)        |
| CinguloOperc-lhInsula                       | -29        | 24        | 8          | 0.285        | 0.582        | 1.07        | -1.88       | 0.092(.238)         | 0.111(.225)         |
| CinguloOperc-<br>lhOpercularRolandic        | -60        | -4        | 9          | 0.059        | 0.314        | -1.89       | -0.67       | -0.082(.250)        | -0.122(.265)        |
| CinguloOperc-<br>lhSuperiorTemporal         | -55        | -32       | 23         | 0.378        | 0.656        | -0.88       | -2.05       | -0.106(.205)        | -0.121(.213)        |
| CinguloOperc-<br>lhSupraMarginal            | -59        | -24       | 31         | 0.044        | 0.298        | -2.01       | -0.46       | -0.043(.197)        | -0.074(.199)        |
| CinguloOperc-<br>lhOpercularRolandic        | -52        | -1        | 5          | 0.154        | 0.465        | -1.43       | -1.44       | -0.070(.212)        | -0.093(.208)        |
| CinguloOperc-<br>lhOpercularInferiorFrontal | -49        | 8         | 11         | 0.764        | 0.888        | -0.3        | -2.38       | 0.041(.209)         | 0.037(.209)         |
| CinguloOperc-<br>lhMiddleFrontal            | -27        | 47        | 21         | 0.848        | 0.919        | 0.19        | -2.42       | 0.060(.291)         | 0.064(.268)         |
| CinguloOperc-<br>lhMiddleFrontal            | -29        | 38        | 28         | 0.992        | 0.996        | -0.01       | -2.43       | 0.026(.230)         | 0.025(.231)         |
| CinguloOperc-<br>rhMiddleCingulum           | 16         | -33       | 43         | 0.476        | 0.722        | -0.71       | -2.17       | -0.017(.162)        | -0.026(.159)        |
| CinguloOperc-<br>rhSupplementaryMotor       | 7          | 5         | 56         | 0.579        | 0.796        | 0.56        | -2.28       | 0.040(.220)         | 0.050(.208)         |
| CinguloOperc-<br>rhMiddleCingulum           | 9          | 4         | 40         | 0.486        | 0.731        | -0.7        | -2.19       | -0.005(.165)        | -0.014(.164)        |
| CinguloOperc-<br>rhMiddleCingulum           | 9          | 11        | 46         | 0.568        | 0.794        | 0.57        | -2.27       | 0.110(.262)         | 0.120(.228)         |
| CinguloOperc-<br>rhMiddleCingulum           | 6          | 22        | 32         | 0.993        | 0.996        | -0.01       | -2.43       | 0.084(.216)         | 0.084(.199)         |
| CinguloOperc-<br>rhSupplementaryMotor       | 16         | 1         | 68         | 0.051        | 0.298        | 1.95        | -0.55       | 0.028(.180)         | 0.056(.171)         |
| CinguloOperc-<br>rhSupplementaryMotor       | 8          | -6        | 64         | 0.614        | 0.819        | -0.5        | -2.29       | -0.020(.155)        | -0.026(.152)        |
| CinguloOperc-rhPrecentral                   | 42         | -2        | 47         | 0.882        | 0.943        | 0.15        | -2.42       | 0.057(.212)         | 0.059(.212)         |
| CinguloOperc-<br>rhSupraMarginal            | 58         | -40       | 35         | 0.176        | 0.476        | 1.35        | -1.55       | 0.104(.218)         | 0.128(.227)         |
| CinguloOperc-<br>rhSupraMarginal            | 55         | -27       | 30         | 0.375        | 0.656        | -0.89       | -2.04       | -0.063(.181)        | -0.075(.182)        |
| CinguloOperc-rhInsula                       | 39         | -14       | -5         | 0.142        | 0.455        | -1.47       | -1.38       | -0.048(.184)        | -0.068(.175)        |
| CinguloOperc-rhInsula                       | 40         | 1         | -13        | 0.083        | 0.367        | -1.73       | -0.95       | -0.047(.200)        | -0.074(.194)        |

|                                       |            |            |            |              |              |             |             |                     |                     |
|---------------------------------------|------------|------------|------------|--------------|--------------|-------------|-------------|---------------------|---------------------|
| CinguloOperc-rhInsula                 | 37         | 5          | 13         | 0.95         | 0.978        | -0.06       | -2.43       | -0.081(.205)        | -0.082(.195)        |
| CinguloOperc-rhInsula                 | 40         | 10         | -2         | 0.367        | 0.649        | 0.9         | -2.03       | 0.007(.202)         | 0.020(.180)         |
| CinguloOperc-rhInsula                 | 36         | 6          | 6          | 0.162        | 0.471        | -1.4        | -1.48       | -0.012(.187)        | -0.032(.173)        |
| CinguloOperc-rhInsula                 | 34         | 23         | 4          | 0.064        | 0.318        | 1.85        | -0.76       | 0.169(.289)         | 0.209(.276)         |
| CinguloOperc-rhInsula                 | 34         | 24         | 10         | 0.068        | 0.327        | 1.82        | -0.81       | 0.078(.244)         | 0.112(.242)         |
| CinguloOperc-rhOpercularRolandic      | 50         | 3          | 4          | 0.328        | 0.604        | -0.98       | -1.96       | -0.031(.186)        | -0.046(.183)        |
| CinguloOperc-rhSuperiorFrontal        | 24         | 51         | 24         | 0.67         | 0.858        | 0.43        | -2.34       | 0.035(.271)         | 0.044(.258)         |
| CinguloOperc-rhMiddleFrontal          | 31         | 40         | 26         | 0.04         | 0.298        | 2.06        | -0.36       | 0.072(.245)         | 0.109(.226)         |
| CinguloParietal-lhMiddleCingulum      | -6         | -26        | 28         | 0.216        | 0.496        | -1.24       | -1.69       | 0.067(.265)         | 0.041(.266)         |
| CinguloParietal-lhPrecuneus           | -13        | -65        | 32         | 0.721        | 0.867        | 0.36        | -2.38       | -0.019(.288)        | -0.012(.257)        |
| CinguloParietal-lhPrecuneus           | -11        | -73        | 43         | 0.444        | 0.704        | 0.77        | -2.12       | 0.039(.249)         | 0.054(.249)         |
| CinguloParietal-rhMiddleCingulum      | 8          | -27        | 28         | 0.749        | 0.88         | -0.32       | -2.38       | 0.047(.269)         | 0.040(.263)         |
| CinguloParietal-rhCuneus              | 16         | -70        | 40         | 0.895        | 0.948        | 0.13        | -2.41       | 0.040(.251)         | 0.043(.234)         |
| Default-lhPrecuneus                   | -11        | -52        | 36         | 0.381        | 0.656        | -0.88       | -2.07       | -0.000(.212)        | -0.013(.192)        |
| Default-lhSuperiorFrontal             | -12        | 27         | 57         | 0.14         | 0.455        | -1.48       | -1.36       | 0.024(.175)         | 0.005(.162)         |
| Default-lhAngular                     | -47        | -58        | 31         | 0.77         | 0.889        | 0.29        | -2.4        | 0.055(.215)         | 0.060(.200)         |
| Default-lhMedialSuperiorFrontal       | -6         | 42         | 35         | 0.475        | 0.722        | 0.71        | -2.19       | 0.005(.217)         | 0.016(.208)         |
| <b>Default-lhMiddleCingulum</b>       | <b>-2</b>  | <b>-18</b> | <b>39</b>  | <b>0.003</b> | <b>0.154</b> | <b>3.02</b> | <b>2.03</b> | <b>0.006(.203)</b>  | <b>-0.042(.203)</b> |
| Default-lhSuperiorFrontal             | -20        | 30         | 46         | 0.326        | 0.604        | -0.98       | -1.94       | 0.038(.179)         | 0.024(.174)         |
| Default-lhMiddleOccipital             | -39        | -74        | 38         | 0.738        | 0.872        | 0.33        | -2.38       | 0.036(.227)         | 0.042(.217)         |
| Default-lhOrbitalSuperiorFrontal      | -28        | 54         | 0          | 0.79         | 0.897        | -0.27       | -2.37       | 0.102(.401)         | 0.093(.382)         |
| <b>Default-lhOrbitalMedialFrontal</b> | <b>-6</b>  | <b>55</b>  | <b>-11</b> | <b>0.002</b> | <b>0.154</b> | <b>3.11</b> | <b>2.33</b> | <b>-0.059(.426)</b> | <b>-0.161(.402)</b> |
| Default-lhOrbitalMedialFrontal        | -7         | 38         | -9         | 0.061        | 0.314        | -1.87       | -0.71       | -0.128(.384)        | -0.182(.361)        |
| Default-lhMiddleTemporal              | -63        | -29        | -7         | 0.089        | 0.389        | 1.7         | -1          | -0.026(.322)        | 0.017(.314)         |
| <b>Default-lhMiddleTemporal</b>       | <b>-53</b> | <b>-11</b> | <b>-16</b> | <b>0.003</b> | <b>0.154</b> | <b>3.01</b> | <b>1.99</b> | <b>-0.020(.235)</b> | <b>-0.076(.231)</b> |
| <b>Default-lhSuperiorFrontal</b>      | <b>-16</b> | <b>49</b>  | <b>37</b>  | <b>0.003</b> | <b>0.154</b> | <b>2.97</b> | <b>1.86</b> | <b>-0.024(.194)</b> | <b>-0.069(.190)</b> |
| Default-lhSuperiorFrontal             | -20        | 56         | 28         | 0.02         | 0.271        | -2.33       | 0.22        | 0.001(.210)         | -0.041(.230)        |
| Default-lhMedialSuperiorFrontal       | -6         | 55         | 18         | 0.062        | 0.314        | -1.87       | -0.71       | -0.081(.197)        | -0.112(.213)        |
| Default-lhSuperiorFrontal             | -16        | 65         | 14         | 0.011        | 0.249        | -2.53       | 0.71        | 0.017(.309)         | -0.050(.331)        |
| Default-lhAnteriorCingulum            | -6         | 45         | 6          | 0.102        | 0.406        | -1.64       | -1.12       | -0.039(.211)        | -0.068(.222)        |
| Default-lhMiddleFrontal               | -26        | 27         | 39         | 0.096        | 0.398        | 1.66        | -1.08       | 0.031(.240)         | 0.061(.225)         |
| Default-lhMiddleFrontal               | -29        | 17         | 51         | 0.261        | 0.553        | -1.12       | -1.81       | 0.142(.261)         | 0.121(.234)         |
| Default-lhMiddleFrontal               | -42        | 16         | 48         | 0.911        | 0.954        | 0.11        | -2.43       | 0.083(.222)         | 0.085(.211)         |
| Default-rhPrecuneus                   | 12         | -52        | 34         | 0.689        | 0.86         | -0.4        | -2.37       | 0.019(.223)         | 0.013(.191)         |

|                                        |          |           |           |              |              |             |             |                     |                     |
|----------------------------------------|----------|-----------|-----------|--------------|--------------|-------------|-------------|---------------------|---------------------|
| Default-rhSupplementaryMotor           | 12       | 22        | 60        | 0.182        | 0.476        | -1.34       | -1.55       | 0.030(.159)         | 0.014(.158)         |
| Default-rhAnteriorCingulum             | 8        | 44        | 6         | 0.121        | 0.437        | -1.55       | -1.25       | -0.009(.212)        | -0.035(.213)        |
| Default-rhMiddleCingulum               | 3        | -20       | 38        | 0.064        | 0.318        | -1.85       | -0.75       | 0.007(.236)         | -0.026(.219)        |
| Default-rhSuperiorFrontal              | 22       | 21        | 46        | 0.661        | 0.853        | 0.44        | -2.35       | 0.111(.217)         | 0.118(.202)         |
| Default-rhAngular                      | 49       | -53       | 29        | 0.029        | 0.273        | 2.18        | -0.13       | 0.046(.212)         | 0.083(.221)         |
| Default-rhMiddleTemporal               | 62       | -26       | -6        | 0.561        | 0.79         | 0.58        | -2.25       | 0.034(.253)         | 0.046(.262)         |
| Default-rhPrecuneus                    | 7        | -69       | 50        | 0.468        | 0.722        | 0.73        | -2.18       | 0.297(.380)         | 0.319(.374)         |
| Default-rhAngular                      | 46       | -67       | 36        | 0.119        | 0.437        | 1.56        | -1.23       | 0.052(.201)         | 0.077(.204)         |
| Default-rhOrbitalMedialFrontal         | 5        | 65        | -7        | 0.187        | 0.476        | -1.32       | -1.52       | 0.010(.463)         | -0.041(.457)        |
| Default-rhOrbitalMedialFrontal         | 7        | 48        | -10       | 0.155        | 0.465        | -1.42       | -1.42       | -0.105(.389)        | -0.152(.403)        |
| Default-rhMiddleTemporal               | 58       | -7        | -16       | 0.075        | 0.348        | -1.78       | -0.85       | -0.015(.247)        | -0.049(.233)        |
| Default-rhMiddleFrontal                | 21       | 33        | 42        | 0.173        | 0.475        | 1.36        | -1.52       | 0.011(.208)         | 0.031(.187)         |
| Default-rhSuperiorFrontal              | 21       | 43        | 35        | 0.847        | 0.919        | -0.19       | -2.41       | 0.019(.222)         | 0.015(.211)         |
| Default-rhSuperiorFrontal              | 16       | 61        | 20        | 0.131        | 0.454        | -1.51       | -1.31       | 0.003(.278)         | -0.027(.255)        |
| <b>Default-rhMedialSuperiorFrontal</b> | <b>8</b> | <b>54</b> | <b>14</b> | <b>0.004</b> | <b>0.167</b> | <b>2.88</b> | <b>1.61</b> | <b>-0.039(.231)</b> | <b>-0.089(.219)</b> |
| Default-rhMedialSuperiorFrontal        | 6        | 55        | 29        | 0.126        | 0.443        | -1.53       | -1.27       | -0.064(.206)        | -0.091(.224)        |
| Default-rhSuperiorFrontal              | 14       | 47        | 42        | 0.05         | 0.298        | -1.96       | -0.56       | -0.024(.198)        | -0.054(.193)        |
| Default-rhMedialSuperiorFrontal        | 7        | 44        | 35        | 0.399        | 0.664        | 0.84        | -2.08       | -0.008(.201)        | 0.005(.194)         |
| Default-rhMiddleFrontal                | 31       | 19        | 49        | 0.12         | 0.437        | 1.56        | -1.26       | 0.117(.245)         | 0.147(.243)         |
| Default-rhSuperiorTemporal             | 54       | 1         | -13       | 0.457        | 0.714        | 0.74        | -2.13       | -0.070(.196)        | -0.058(.201)        |
| DorsalAttn-lhPrecentral                | -27      | -7        | 46        | 0.398        | 0.664        | 0.85        | -2.08       | 0.100(.242)         | 0.115(.218)         |
| DorsalAttn-lhMiddleFrontal             | -27      | 2         | 53        | 0.206        | 0.486        | 1.26        | -1.66       | 0.169(.251)         | 0.192(.230)         |
| DorsalAttn-lhSuperiorFrontal           | -20      | 6         | 56        | 0.306        | 0.586        | 1.02        | -1.92       | 0.161(.243)         | 0.181(.241)         |
| DorsalAttn-lhSuperiorFrontal           | -21      | 0         | 63        | 0.933        | 0.972        | 0.08        | -2.41       | 0.085(.204)         | 0.086(.181)         |
| DorsalAttn-lhInferiorParietal          | -31      | -49       | 47        | 0.295        | 0.586        | 1.05        | -1.89       | 0.114(.230)         | 0.133(.230)         |
| DorsalAttn-lhInferiorParietal          | -43      | -45       | 43        | 0.521        | 0.764        | 0.64        | -2.24       | 0.198(.290)         | 0.211(.258)         |
| DorsalAttn-lhInferiorParietal          | -52      | -31       | 40        | 0.268        | 0.562        | -1.11       | -1.84       | 0.039(.213)         | 0.021(.206)         |
| DorsalAttn-lhTriangularInferiorFrontal | -44      | 36        | 8         | 0.117        | 0.437        | -1.57       | -1.22       | -0.001(.244)        | -0.033(.256)        |
| DorsalAttn-lhSuperiorParietal          | -20      | -65       | 51        | 0.607        | 0.812        | 0.51        | -2.3        | 0.081(.256)         | 0.091(.236)         |
| DorsalAttn-lhMiddleOccipital           | -26      | -65       | 32        | 0.978        | 0.992        | 0.03        | -2.44       | 0.033(.243)         | 0.034(.223)         |
| DorsalAttn-lhPrecuneus                 | -10      | -57       | 60        | 0.199        | 0.486        | 1.29        | -1.64       | 0.048(.221)         | 0.070(.210)         |
| DorsalAttn-lhPrecuneus                 | -7       | -64       | 55        | 0.022        | 0.271        | 2.29        | 0.12        | 0.224(.327)         | 0.283(.329)         |
| DorsalAttn-lhMiddleOccipital           | -30      | -74       | 36        | 0.582        | 0.797        | -0.55       | -2.29       | 0.103(.284)         | 0.091(.262)         |

|                                                |     |     |    |       |       |       |       |              |              |
|------------------------------------------------|-----|-----|----|-------|-------|-------|-------|--------------|--------------|
| DorsalAttn-<br>lhInferiorTemporal              | -46 | -58 | -8 | 0.054 | 0.306 | -1.93 | -0.61 | -0.031(.200) | -0.059(.182) |
| DorsalAttn-lhPrecentral                        | -45 | 3   | 32 | 0.727 | 0.868 | -0.35 | -2.37 | 0.083(.216)  | 0.077(.233)  |
| DorsalAttn-lhPrecentral                        | -35 | 6   | 34 | 0.553 | 0.782 | -0.59 | -2.26 | 0.106(.304)  | 0.092(.300)  |
| DorsalAttn-<br>lhMiddleFrontal                 | -38 | 38  | 17 | 0.381 | 0.656 | -0.88 | -2.05 | 0.058(.279)  | 0.040(.270)  |
| DorsalAttn-<br>lhOpercularInferiorFrontal      | -42 | 9   | 22 | 0.167 | 0.475 | -1.38 | -1.5  | 0.092(.294)  | 0.063(.264)  |
| DorsalAttn-<br>lhMiddleFrontal                 | -36 | 33  | 32 | 0.665 | 0.855 | 0.43  | -2.34 | 0.106(.264)  | 0.114(.250)  |
| DorsalAttn-rhPrecuneus                         | 10  | -57 | 58 | 0.016 | 0.262 | 2.4   | 0.39  | 0.095(.261)  | 0.140(.237)  |
| DorsalAttn-<br>rhMiddleFrontal                 | 29  | 2   | 52 | 0.35  | 0.628 | 0.94  | -2.01 | 0.175(.256)  | 0.193(.235)  |
| DorsalAttn-rhPrecentral                        | 30  | -8  | 47 | 0.55  | 0.782 | 0.6   | -2.26 | 0.105(.252)  | 0.116(.235)  |
| DorsalAttn-<br>rhSuperiorFrontal               | 23  | 6   | 58 | 0.05  | 0.298 | 1.96  | -0.56 | 0.176(.268)  | 0.214(.245)  |
| DorsalAttn-<br>rhInferiorParietal              | 39  | -43 | 40 | 0.024 | 0.273 | 2.26  | 0.04  | 0.206(.306)  | 0.259(.300)  |
| DorsalAttn-<br>rhMiddleFrontal                 | 37  | 38  | 13 | 0.427 | 0.695 | -0.8  | -2.11 | 0.071(.234)  | 0.056(.248)  |
| DorsalAttn-<br>rhTriangularInferiorFrontal     | 48  | 38  | 2  | 0.097 | 0.399 | -1.66 | -1.1  | -0.013(.301) | -0.054(.316) |
| DorsalAttn-<br>rhSuperiorParietal              | 23  | -66 | 52 | 0.374 | 0.656 | 0.89  | -2.05 | 0.102(.255)  | 0.120(.254)  |
| DorsalAttn-<br>rhMiddleOccipital               | 32  | -64 | 34 | 0.506 | 0.748 | -0.67 | -2.23 | 0.073(.245)  | 0.061(.224)  |
| DorsalAttn-<br>rhInferiorParietal              | 34  | -48 | 49 | 0.173 | 0.475 | 1.36  | -1.53 | 0.130(.263)  | 0.157(.256)  |
| DorsalAttn-<br>rhMiddleTemporal                | 57  | -54 | -1 | 0.4   | 0.664 | 0.84  | -2.08 | 0.016(.236)  | 0.032(.245)  |
| DorsalAttn-rhPrecentral                        | 47  | 2   | 38 | 0.684 | 0.86  | 0.41  | -2.35 | 0.047(.240)  | 0.055(.241)  |
| DorsalAttn-<br>rhOpercularInferiorFrontal      | 47  | 8   | 19 | 0.755 | 0.88  | -0.31 | -2.38 | 0.077(.203)  | 0.072(.205)  |
| FrontoParietal-<br>lhMiddleFrontal             | -38 | 49  | 10 | 0.396 | 0.664 | 0.85  | -2.09 | 0.113(.342)  | 0.135(.330)  |
| FrontoParietal-<br>lhInferiorTemporal          | -56 | -48 | -9 | 0.185 | 0.476 | -1.33 | -1.57 | 0.010(.265)  | -0.017(.256) |
| FrontoParietal-<br>lhMedialSuperiorFrontal     | -6  | 29  | 44 | 0.288 | 0.582 | 1.06  | -1.89 | 0.111(.239)  | 0.129(.212)  |
| FrontoParietal-<br>lhOrbitalMiddleFrontal      | -40 | 50  | -5 | 0.949 | 0.978 | -0.06 | -2.41 | 0.099(.404)  | 0.097(.383)  |
| FrontoParietal-lhAngular                       | -34 | -61 | 42 | 0.14  | 0.455 | 1.48  | -1.37 | 0.121(.270)  | 0.152(.268)  |
| FrontoParietal-<br>lhOpercularInferiorFrontal  | -43 | 19  | 34 | 0.211 | 0.489 | 1.25  | -1.66 | 0.142(.322)  | 0.173(.317)  |
| FrontoParietal-<br>lhTriangularInferiorFrontal | -40 | 24  | 23 | 0.248 | 0.531 | -1.16 | -1.79 | 0.089(.275)  | 0.065(.269)  |
| FrontoParietal-<br>lhSuperiorFrontal           | -21 | 63  | 2  | 0.779 | 0.896 | 0.28  | -2.37 | 0.054(.350)  | 0.062(.373)  |
| FrontoParietal-<br>lhMiddleFrontal             | -29 | 51  | 10 | 0.708 | 0.866 | 0.38  | -2.36 | 0.129(.329)  | 0.139(.334)  |

|                                            |            |           |            |              |              |             |             |                     |                     |
|--------------------------------------------|------------|-----------|------------|--------------|--------------|-------------|-------------|---------------------|---------------------|
| FrontoParietal-rhSupraMarginal             | 48         | -42       | 42         | 0.011        | 0.249        | 2.53        | 0.69        | 0.194(.280)         | 0.248(.269)         |
| FrontoParietal-rhMiddleFrontal             | 38         | 46        | 8          | 0.943        | 0.978        | -0.07       | -2.43       | 0.085(.306)         | 0.083(.292)         |
| FrontoParietal-rhInferiorTemporal          | 60         | -41       | -11        | 0.303        | 0.586        | 1.03        | -1.92       | 0.047(.266)         | 0.068(.267)         |
| FrontoParietal-rhSupplementaryMotor        | 7          | 26        | 47         | 0.96         | 0.985        | 0.05        | -2.44       | 0.134(.230)         | 0.135(.221)         |
| FrontoParietal-rhOrbitalInferiorFrontal    | 43         | 48        | -5         | 0.795        | 0.897        | -0.26       | -2.36       | 0.111(.354)         | 0.104(.356)         |
| FrontoParietal-rhInferiorParietal          | 42         | -54       | 44         | 0.201        | 0.486        | 1.28        | -1.64       | 0.148(.305)         | 0.177(.291)         |
| FrontoParietal-rhAngular                   | 36         | -57       | 45         | 0.029        | 0.273        | 2.18        | -0.1        | 0.115(.316)         | 0.168(.302)         |
| FrontoParietal-rhMiddleFrontal             | 38         | 29        | 36         | 0.423        | 0.693        | 0.8         | -2.13       | 0.170(.287)         | 0.187(.271)         |
| FrontoParietal-rhTriangularInferiorFrontal | 42         | 29        | 22         | 0.833        | 0.915        | -0.21       | -2.42       | 0.047(.251)         | 0.043(.258)         |
| FrontoParietal-rhTriangularInferiorFrontal | 39         | 19        | 26         | 0.457        | 0.714        | 0.74        | -2.17       | 0.016(.272)         | 0.032(.282)         |
| FrontoParietal-rhOrbitalSuperiorFrontal    | 28         | 57        | -5         | 0.567        | 0.794        | 0.57        | -2.24       | 0.078(.458)         | 0.097(.398)         |
| FrontoParietal-rhSuperiorFrontal           | 24         | 59        | 5          | 0.274        | 0.568        | -1.09       | -1.83       | 0.096(.345)         | 0.068(.323)         |
| FrontoParietal-rhSuperiorFrontal           | 31         | 52        | 10         | 0.714        | 0.866        | 0.37        | -2.35       | 0.108(.342)         | 0.118(.327)         |
| FrontoParietal-rhMiddleFrontal             | 42         | 20        | 48         | 0.736        | 0.872        | 0.34        | -2.37       | 0.118(.244)         | 0.124(.223)         |
| FrontoParietal-rhMiddleFrontal             | 39         | 10        | 43         | 0.806        | 0.901        | 0.25        | -2.4        | 0.089(.263)         | 0.094(.244)         |
| None-lhSuperiorPoleTemporal                | -29        | 5         | -27        | 0.683        | 0.86         | -0.41       | -2.34       | -0.059(.276)        | -0.067(.253)        |
| None-lhParaHippocampal                     | -29        | -36       | -8         | 0.171        | 0.475        | -1.37       | -1.5        | -0.016(.170)        | -0.033(.153)        |
| None-lhLingual                             | -18        | -39       | -1         | 0.502        | 0.747        | -0.67       | -2.21       | -0.014(.214)        | -0.025(.202)        |
| None-lhMiddlePoleTemporal                  | -34        | 17        | -32        | 0.77         | 0.889        | 0.29        | -2.35       | -0.079(.206)        | -0.074(.216)        |
| None-lhOrbitalSuperiorFrontal              | -23        | 61        | -7         | 0.873        | 0.939        | -0.16       | -2.38       | 0.077(.571)         | 0.070(.559)         |
| None-lhAmygdala                            | -32        | 3         | -17        | 0.541        | 0.777        | -0.61       | -2.23       | -0.080(.325)        | -0.096(.324)        |
| <b>None-lhOrbitalInferiorFrontal</b>       | <b>-35</b> | <b>36</b> | <b>-10</b> | <b>0.002</b> | <b>0.154</b> | <b>3.09</b> | <b>2.22</b> | <b>-0.132(.360)</b> | <b>-0.216(.347)</b> |
| None-lhOrbitalMiddleFrontal                | -22        | 32        | -14        | 0.024        | 0.273        | -2.26       | 0.07        | -0.020(.273)        | -0.068(.268)        |
| None-lhOrbitalSuperiorFrontal              | -24        | 52        | -13        | 0.021        | 0.271        | -2.31       | 0.19        | 0.206(.497)         | 0.118(.472)         |
| None-lhOrbitalSuperiorFrontal              | -17        | 47        | -18        | 0.048        | 0.298        | 1.98        | -0.5        | -0.010(.564)        | 0.082(.573)         |
| None-lhOrbitalSuperiorFrontal              | -13        | 24        | -16        | 0.014        | 0.251        | -2.45       | 0.51        | 0.134(.498)         | 0.024(.560)         |
| None-lhRectus                              | -9         | 46        | -21        | 0.805        | 0.901        | 0.25        | -2.38       | 0.035(1.343)        | -0.009(1.311)       |
| None-lhRectus                              | -2         | 34        | -26        | 0.249        | 0.531        | -1.15       | -1.76       | 0.067(1.540)        | -0.087(1.663)       |

|                                      |            |            |            |              |              |             |             |                     |                     |
|--------------------------------------|------------|------------|------------|--------------|--------------|-------------|-------------|---------------------|---------------------|
| None-lhInferiorTemporal              | -53        | -13        | -29        | 0.124        | 0.441        | -1.54       | -1.26       | 0.019(.570)         | -0.048(.540)        |
| None-lhInferiorTemporal              | -45        | 9          | -37        | 0.271        | 0.564        | -1.1        | -1.82       | -0.077(.214)        | -0.096(.208)        |
| None-lhInferiorTemporal              | -55        | -40        | -16        | 0.59         | 0.802        | -0.54       | -2.27       | 0.059(.307)         | 0.044(.344)         |
| None-lhFusiform                      | -32        | -4         | -45        | 0.536        | 0.774        | -0.62       | -2.21       | -0.057(.358)        | -0.078(.419)        |
| None-lhInferiorTemporal              | -39        | -13        | -27        | 0.159        | 0.467        | -1.41       | -1.41       | -0.038(.290)        | -0.070(.268)        |
| <b>None-lhParaHippocampal</b>        | <b>-20</b> | <b>-13</b> | <b>-24</b> | <b>0.005</b> | <b>0.167</b> | <b>-2.8</b> | <b>1.4</b>  | <b>0.011(.298)</b>  | <b>-0.052(.279)</b> |
| None-lhParaHippocampal               | -22        | -22        | -17        | 0.819        | 0.904        | -0.23       | -2.39       | -0.051(.258)        | -0.056(.253)        |
| None-lhSuperiorPoleTemporal          | -51        | 7          | -20        | 0.733        | 0.872        | -0.34       | -2.37       | -0.063(.194)        | -0.068(.189)        |
| None-rhSuperiorPoleTemporal          | 32         | 14         | -30        | 0.393        | 0.664        | -0.85       | -2.02       | -0.035(.223)        | -0.051(.226)        |
| None-rhParaHippocampal               | 25         | -36        | -5         | 0.875        | 0.939        | 0.16        | -2.4        | -0.014(.178)        | -0.012(.171)        |
| None-rhParaHippocampal               | 19         | -30        | -10        | 0.333        | 0.61         | -0.97       | -1.94       | -0.027(.343)        | -0.055(.356)        |
| None-rhRectus                        | 3          | 19         | -23        | 0.411        | 0.679        | -0.82       | -2.08       | 0.021(.733)         | -0.027(.735)        |
| <b>None-rhOrbitalInferiorFrontal</b> | <b>35</b>  | <b>37</b>  | <b>-8</b>  | <b>0.002</b> | <b>0.154</b> | <b>-3.1</b> | <b>2.27</b> | <b>-0.078(.321)</b> | <b>-0.152(.301)</b> |
| None-rhOlfactory                     | 25         | 9          | -16        | 0.014        | 0.251        | -2.46       | 0.56        | -0.016(.310)        | -0.079(.315)        |
| None-rhOrbitalSuperiorFrontal        | 21         | 30         | -15        | 0.442        | 0.704        | -0.77       | -2.13       | -0.030(.264)        | -0.047(.275)        |
| None-rhOrbitalSuperiorFrontal        | 22         | 51         | -14        | 0.691        | 0.86         | 0.4         | -2.33       | 0.150(.524)         | 0.166(.493)         |
| None-rhOrbitalSuperiorFrontal        | 12         | 26         | -25        | 0.027        | 0.273        | -2.22       | -0.02       | 0.200(1.218)        | -0.019(1.236)       |
| None-rhRectus                        | 14         | 20         | -15        | 0.786        | 0.897        | 0.27        | -2.39       | 0.066(.385)         | 0.074(.390)         |
| None-rhRectus                        | 11         | 39         | -20        | 0.644        | 0.842        | -0.46       | -2.3        | 0.048(.855)         | 0.014(.917)         |
| None-lhRectus                        | 2          | 39         | -26        | 0.627        | 0.829        | -0.49       | -2.27       | 0.022(1.420)        | -0.040(1.559)       |
| None-rhInferiorTemporal              | 62         | -26        | -16        | 0.716        | 0.866        | 0.36        | -2.33       | 0.119(.471)         | 0.133(.469)         |
| None-rhInferiorTemporal              | 55         | -8         | -27        | 0.726        | 0.868        | -0.35       | -2.35       | -0.049(.442)        | -0.061(.412)        |
| None-rhMiddlePoleTemporal            | 45         | 14         | -30        | 0.228        | 0.518        | -1.21       | -1.72       | -0.061(.185)        | -0.079(.179)        |
| None-rhParaHippocampal               | 20         | -21        | -22        | 0.896        | 0.948        | -0.13       | -2.4        | -0.033(.294)        | -0.036(.271)        |
| None-rhFusiform                      | 28         | 0          | -37        | 0.443        | 0.704        | -0.77       | -2.11       | -0.037(.492)        | -0.069(.507)        |
| None-rhInferiorTemporal              | 37         | 8          | -38        | 0.148        | 0.465        | -1.45       | -1.38       | -0.049(.269)        | -0.081(.271)        |
| <b>None-rhInferiorTemporal</b>       | <b>54</b>  | <b>-10</b> | <b>-37</b> | <b>0.001</b> | <b>0.154</b> | <b>3.36</b> | <b>3.13</b> | <b>0.091(.515)</b>  | <b>-0.044(.479)</b> |
| None-rhInferiorTemporal              | 56         | -27        | -19        | 0.785        | 0.897        | -0.27       | -2.35       | 0.101(.765)         | 0.085(.719)         |
| None-rhFusiform                      | 31         | 2          | -46        | 0.478        | 0.722        | 0.71        | -2.15       | -0.079(.468)        | -0.051(.478)        |
| None-rhFusiform                      | 40         | -12        | -30        | 0.529        | 0.767        | -0.63       | -2.2        | -0.049(.322)        | -0.064(.297)        |
| None-rhFusiform                      | 32         | -9         | -36        | 0.99         | 0.996        | -0.01       | -2.39       | -0.024(.389)        | -0.024(.393)        |
| None-rhInferiorTemporal              | 43         | -24        | -21        | 0.336        | 0.612        | -0.96       | -1.94       | -0.042(.368)        | -0.072(.380)        |
| None-rhParaHippocampal               | 20         | -11        | -25        | 0.035        | 0.298        | -2.11       | -0.25       | -0.017(.304)        | -0.062(.267)        |
| None-rhParaHippocampal               | 30         | -19        | -19        | 0.022        | 0.271        | -2.29       | 0.14        | -0.017(.260)        | -0.065(.260)        |
| RetrosplenialTemporal-lhCalcarine    | -14        | -58        | 18         | 0.384        | 0.657        | -0.87       | -2.06       | -0.107(.239)        | -0.122(.225)        |
| RetrosplenialTemporal-lhLingual      | -9         | -50        | 4          | 0.049        | 0.298        | -1.97       | -0.52       | -0.094(.255)        | -0.135(.255)        |
| RetrosplenialTemporal-lhFusiform     | -34        | -33        | -15        | 0.095        | 0.396        | -1.67       | -1.06       | -0.092(.213)        | -0.117(.190)        |
| RetrosplenialTemporal-lhFusiform     | -22        | -37        | -15        | 0.244        | 0.527        | -1.16       | -1.77       | -0.089(.233)        | -0.108(.206)        |

|                                       |            |            |           |              |              |             |             |                    |                     |
|---------------------------------------|------------|------------|-----------|--------------|--------------|-------------|-------------|--------------------|---------------------|
| RetrosplenialTemporal-<br>rhCalcarine | 14         | -54        | 11        | 0.21         | 0.489        | -1.25       | -1.66       | -0.068(.243)       | -0.090(.221)        |
| RetrosplenialTemporal-<br>rhFusiform  | 35         | -36        | -12       | 0.046        | 0.298        | -1.99       | -0.49       | -0.079(.240)       | -0.114(.221)        |
| RetrosplenialTemporal-<br>rhFusiform  | 35         | -24        | -20       | 0.029        | 0.273        | -2.18       | -0.1        | -0.044(.247)       | -0.083(.225)        |
| RetrosplenialTemporal-<br>rhFusiform  | 24         | -36        | -13       | 0.441        | 0.704        | -0.77       | -2.13       | -0.085(.243)       | -0.099(.220)        |
| Saliency-<br>lhAnteriorCingulum       | -10        | 34         | 22        | 0.969        | 0.989        | -0.04       | -2.43       | 0.079(.224)        | 0.078(.226)         |
| Saliency-lhInsula                     | -32        | 17         | -8        | 0.029        | 0.273        | 2.18        | -0.1        | 0.068(.282)        | 0.115(.270)         |
| Saliency-<br>rhAnteriorCingulum       | 8          | 35         | 23        | 0.082        | 0.364        | 1.74        | -0.94       | 0.055(.244)        | 0.088(.236)         |
| Saliency-rhInsula                     | 31         | 23         | -5        | 0.015        | 0.251        | 2.43        | 0.46        | 0.113(.317)        | 0.171(.299)         |
| SMhand-lhSuperiorParietal             | -19        | -49        | 65        | 0.268        | 0.562        | -1.11       | -1.81       | -0.044(.156)       | -0.058(.156)        |
| SMhand-lhPrecuneus                    | -11        | -48        | 60        | 0.458        | 0.714        | -0.74       | -2.15       | -0.050(.216)       | -0.062(.200)        |
| SMhand-<br>lhLobuleParacentral        | -16        | -33        | 66        | 0.893        | 0.948        | 0.13        | -2.41       | -0.116(.241)       | -0.113(.224)        |
| SMhand-<br>lhLobuleParacentral        | -11        | -29        | 70        | 0.232        | 0.518        | -1.19       | -1.71       | -0.041(.176)       | -0.056(.151)        |
| SMhand-<br>lhLobuleParacentral        | -7         | -20        | 74        | 0.207        | 0.486        | 1.26        | -1.63       | -0.059(.238)       | -0.038(.207)        |
| SMhand-lhPrecuneus                    | -11        | -41        | 65        | 0.203        | 0.486        | -1.27       | -1.63       | -0.031(.213)       | -0.049(.176)        |
| SMhand-<br>lhLobuleParacentral        | -5         | -28        | 60        | 0.303        | 0.586        | -1.03       | -1.9        | -0.042(.177)       | -0.056(.165)        |
| SMhand-lhMiddleCingulum               | -5         | -16        | 49        | 0.24         | 0.524        | -1.18       | -1.75       | -0.064(.188)       | -0.082(.194)        |
| SMhand-lhPostcentral                  | -36        | -30        | 54        | 0.142        | 0.455        | -1.47       | -1.38       | -0.060(.235)       | -0.088(.247)        |
| SMhand-lhPrecentral                   | -37        | -23        | 62        | 0.092        | 0.394        | -1.69       | -1.03       | -0.030(.164)       | -0.052(.168)        |
| SMhand-lhPrecentral                   | -20        | -25        | 64        | 0.167        | 0.475        | -1.38       | -1.48       | -0.036(.164)       | -0.055(.164)        |
| SMhand-lhPrecentral                   | -23        | -14        | 64        | 0.205        | 0.486        | -1.27       | -1.63       | -0.017(.156)       | -0.033(.151)        |
| SMhand-<br>lhLobuleParacentral        | -17        | -9         | 68        | 0.382        | 0.656        | -0.87       | -2.04       | -0.014(.134)       | -0.024(.138)        |
| SMhand-lhSuperiorParietal             | -29        | -45        | 62        | 0.151        | 0.465        | -1.43       | -1.42       | -0.049(.172)       | -0.069(.175)        |
| SMhand-lhInferiorParietal             | -54        | -21        | 41        | 0.011        | 0.249        | -2.54       | 0.71        | -0.025(.202)       | -0.064(.197)        |
| SMhand-lhPostcentral                  | -35        | -35        | 42        | 0.057        | 0.314        | -1.91       | -0.67       | 0.028(.201)        | -0.003(.209)        |
| SMhand-lhPostcentral                  | -28        | -37        | 61        | 0.134        | 0.454        | -1.5        | -1.32       | -0.032(.155)       | -0.050(.153)        |
| <b>SMhand-lhPostcentral</b>           | <b>-47</b> | <b>-31</b> | <b>55</b> | <b>0.004</b> | <b>0.167</b> | <b>2.85</b> | <b>1.53</b> | <b>0.004(.190)</b> | <b>-0.040(.195)</b> |
| SMhand-rhSuperiorParietal             | 21         | -48        | 66        | 0.525        | 0.766        | 0.64        | -2.23       | -0.064(.176)       | -0.055(.161)        |
| SMhand-rhPostcentral                  | 16         | -33        | 68        | 0.713        | 0.866        | -0.37       | -2.36       | -0.107(.257)       | -0.114(.242)        |
| SMhand-<br>rhLobuleParacentral        | 5          | -27        | 65        | 0.306        | 0.586        | -1.02       | -1.91       | -0.041(.189)       | -0.055(.172)        |
| SMhand-rhPostcentral                  | 12         | -41        | 67        | 0.298        | 0.586        | 1.04        | -1.87       | -0.063(.178)       | -0.048(.177)        |
| SMhand-<br>rhSupplementaryMotor       | 5          | -17        | 52        | 0.229        | 0.518        | -1.2        | -1.72       | -0.059(.217)       | -0.078(.206)        |
| SMhand-<br>rhMiddleCingulum           | 7          | -8         | 51        | 0.184        | 0.476        | -1.33       | -1.55       | -0.062(.213)       | -0.082(.185)        |
| SMhand-rhPrecentral                   | 38         | -22        | 60        | 0.693        | 0.86         | -0.4        | -2.33       | -0.053(.154)       | -0.058(.152)        |
| SMhand-rhPrecentral                   | 20         | -25        | 65        | 0.637        | 0.837        | -0.47       | -2.3        | -0.050(.182)       | -0.056(.159)        |
| SMhand-rhPrecentral                   | 12         | -28        | 70        | 0.597        | 0.806        | -0.53       | -2.27       | -0.043(.179)       | -0.050(.158)        |
| SMhand-rhPrecentral                   | 29         | -14        | 64        | 0.134        | 0.454        | -1.5        | -1.31       | -0.027(.184)       | -0.049(.181)        |

|                                         |     |     |     |       |       |       |       |              |              |
|-----------------------------------------|-----|-----|-----|-------|-------|-------|-------|--------------|--------------|
| SMhand-rhPrecentral                     | 17  | -17 | 71  | 0.184 | 0.476 | -1.33 | -1.55 | -0.042(.156) | -0.058(.152) |
| SMhand-rhSuperiorFrontal                | 21  | -6  | 65  | 0.905 | 0.951 | -0.12 | -2.42 | 0.012(.161)  | 0.011(.160)  |
| SMhand-rhPostcentral                    | 30  | -42 | 60  | 0.038 | 0.298 | -2.08 | -0.32 | -0.052(.194) | -0.084(.191) |
| SMhand-rhInferiorParietal               | 34  | -41 | 52  | 0.575 | 0.796 | -0.56 | -2.29 | 0.005(.254)  | -0.006(.245) |
| SMhand-rhSupraMarginal                  | 40  | -32 | 40  | 0.965 | 0.987 | 0.04  | -2.43 | 0.012(.200)  | 0.013(.213)  |
| SMhand-rhPostcentral                    | 28  | -35 | 63  | 0.789 | 0.897 | -0.27 | -2.38 | -0.043(.160) | -0.046(.150) |
| SMhand-rhPostcentral                    | 39  | -35 | 58  | 0.678 | 0.858 | -0.42 | -2.33 | -0.038(.194) | -0.044(.182) |
| SMhand-rhPostcentral                    | 37  | -26 | 51  | 0.047 | 0.298 | -1.99 | -0.5  | -0.070(.238) | -0.106(.227) |
| SMhand-rhPostcentral                    | 49  | -26 | 52  | 0.042 | 0.298 | -2.04 | -0.41 | -0.025(.187) | -0.055(.193) |
| SMhand-rhSupraMarginal                  | 53  | -23 | 39  | 0.28  | 0.577 | -1.08 | -1.87 | -0.032(.197) | -0.048(.198) |
| SMmouth-lhPostcentral                   | -52 | -8  | 38  | 0.013 | 0.251 | -2.49 | 0.59  | -0.031(.172) | -0.065(.175) |
| SMmouth-lhPostcentral                   | -42 | -12 | 50  | 0.315 | 0.599 | -1.01 | -1.93 | -0.023(.182) | -0.037(.174) |
| SMmouth-lhPostcentral                   | -52 | -12 | 30  | 0.009 | 0.249 | -2.61 | 0.89  | -0.053(.255) | -0.104(.254) |
| SMmouth-lhPostcentral                   | -46 | -18 | 53  | 0.01  | 0.249 | -2.58 | 0.84  | -0.040(.221) | -0.091(.253) |
| SMmouth-rhPostcentral                   | 50  | -7  | 36  | 0.065 | 0.318 | -1.85 | -0.77 | -0.044(.184) | -0.071(.185) |
| SMmouth-rhPrecentral                    | 42  | -11 | 47  | 0.075 | 0.348 | -1.78 | -0.87 | -0.026(.173) | -0.050(.171) |
| SMmouth-rhPostcentral                   | 54  | -8  | 26  | 0.306 | 0.586 | -1.02 | -1.94 | -0.087(.258) | -0.106(.247) |
| SMmouth-rhPrecentral                    | 48  | -15 | 49  | 0.469 | 0.722 | -0.72 | -2.17 | -0.103(.235) | -0.116(.231) |
| Subcortical-lhCerebellum                | NA  | NA  | NA  | 0.503 | 0.747 | -0.67 | -2.23 | 0.081(.231)  | 0.067(.261)  |
| Subcortical-lhThalamus                  | NA  | NA  | NA  | 0.598 | 0.806 | 0.53  | -2.33 | 0.023(.136)  | 0.028(.130)  |
| Subcortical-lhCaudate                   | NA  | NA  | NA  | 0.601 | 0.807 | 0.52  | -2.35 | 0.028(.214)  | 0.036(.199)  |
| Subcortical-lhPutamen                   | NA  | NA  | NA  | 0.815 | 0.904 | -0.23 | -2.44 | -0.017(.176) | -0.019(.165) |
| Subcortical-lhPallidum                  | NA  | NA  | NA  | 0.553 | 0.782 | -0.59 | -2.28 | 0.013(.133)  | 0.007(.133)  |
| Subcortical-brainStem                   | NA  | NA  | NA  | 0.753 | 0.88  | -0.31 | -2.4  | 0.038(.166)  | 0.034(.159)  |
| Subcortical-lhHippocampus               | NA  | NA  | NA  | 0.043 | 0.298 | -2.02 | -0.47 | -0.051(.158) | -0.075(.152) |
| Subcortical-lhAmygdala                  | NA  | NA  | NA  | 0.019 | 0.271 | -2.36 | 0.25  | -0.038(.203) | -0.072(.188) |
| Subcortical-lhAccumbens                 | NA  | NA  | NA  | 0.103 | 0.406 | -1.63 | -1.15 | -0.014(.226) | -0.041(.210) |
| Subcortical-lhVentraldc                 | NA  | NA  | NA  | 0.579 | 0.796 | -0.56 | -2.31 | 0.039(.184)  | 0.032(.166)  |
| Subcortical-rhCerebellum                | NA  | NA  | NA  | 0.243 | 0.527 | 1.17  | -1.79 | 0.035(.268)  | 0.058(.254)  |
| Subcortical-rhThalamus                  | NA  | NA  | NA  | 0.286 | 0.582 | 1.07  | -1.91 | 0.029(.148)  | 0.040(.144)  |
| Subcortical-rhCaudate                   | NA  | NA  | NA  | 0.998 | 0.998 | 0     | -2.47 | 0.034(.200)  | 0.034(.201)  |
| Subcortical-rhPutamen                   | NA  | NA  | NA  | 0.341 | 0.619 | 0.95  | -2.02 | -0.030(.173) | -0.018(.167) |
| Subcortical-rhPallidum                  | NA  | NA  | NA  | 0.155 | 0.465 | 1.42  | -1.47 | 0.012(.150)  | 0.027(.136)  |
| Subcortical-rhHippocampus               | NA  | NA  | NA  | 0.04  | 0.298 | -2.06 | -0.39 | -0.042(.158) | -0.067(.153) |
| Subcortical-rhAmygdala                  | NA  | NA  | NA  | 0.069 | 0.327 | -1.82 | -0.85 | -0.036(.209) | -0.064(.195) |
| Subcortical-rhAccumbens                 | NA  | NA  | NA  | 0.453 | 0.714 | 0.75  | -2.18 | -0.035(.196) | -0.024(.189) |
| Subcortical-rhVentraldc                 | NA  | NA  | NA  | 0.972 | 0.989 | -0.03 | -2.47 | 0.039(.173)  | 0.038(.163)  |
| VentralAttn-lhSupplementaryMotor        | -4  | 12  | 65  | 0.675 | 0.858 | 0.42  | -2.34 | 0.067(.164)  | 0.072(.168)  |
| VentralAttn-lhMiddleTemporal            | -45 | -54 | 15  | 0.357 | 0.636 | 0.92  | -2.02 | 0.025(.241)  | 0.042(.232)  |
| VentralAttn-lhMiddleTemporal            | -52 | -56 | 11  | 0.436 | 0.704 | 0.78  | -2.14 | -0.006(.230) | 0.008(.224)  |
| VentralAttn-lhMiddleTemporal            | -48 | -40 | 2   | 0.71  | 0.866 | 0.37  | -2.37 | -0.021(.165) | -0.016(.175) |
| VentralAttn-lhTriangularInferiorFrontal | -50 | 21  | 11  | 0.046 | 0.298 | -2    | -0.48 | 0.028(.241)  | -0.009(.238) |
| VentralAttn-lhOrbitalInferiorFrontal    | -47 | 39  | -9  | 0.093 | 0.394 | -1.68 | -1.05 | 0.022(.408)  | -0.025(.347) |
| VentralAttn-lhInsula                    | -29 | 20  | -14 | 0.051 | 0.298 | -1.95 | -0.58 | -0.028(.210) | -0.060(.205) |

|                                         |     |     |     |       |       |       |       |              |              |
|-----------------------------------------|-----|-----|-----|-------|-------|-------|-------|--------------|--------------|
| VentralAttn-lhOrbitalInferiorFrontal    | -44 | 33  | -7  | 0.328 | 0.604 | -0.98 | -1.97 | -0.055(.271) | -0.076(.272) |
| VentralAttn-lhTriangularInferiorFrontal | -45 | 29  | 1   | 0.296 | 0.586 | -1.05 | -1.9  | -0.080(.256) | -0.101(.257) |
| VentralAttn-lhPrecentral                | -39 | 5   | 48  | 0.042 | 0.298 | 2.03  | -0.42 | 0.079(.234)  | 0.115(.229)  |
| VentralAttn-lhMiddleTemporal            | -59 | -18 | -3  | 0.573 | 0.796 | -0.56 | -2.27 | -0.049(.220) | -0.058(.209) |
| VentralAttn-rhMiddleTemporal            | 58  | -45 | 9   | 0.898 | 0.948 | 0.13  | -2.43 | -0.013(.217) | -0.011(.200) |
| VentralAttn-rhMiddleTemporal            | 61  | -39 | 2   | 0.837 | 0.915 | -0.21 | -2.42 | 0.004(.239)  | 0.001(.225)  |
| VentralAttn-rhSuperiorTemporal          | 57  | -17 | -3  | 0.049 | 0.298 | -1.97 | -0.52 | -0.025(.208) | -0.055(.190) |
| VentralAttn-rhSuperiorTemporal          | 47  | -40 | 13  | 0.529 | 0.767 | -0.63 | -2.23 | -0.009(.200) | -0.018(.199) |
| VentralAttn-rhMiddleTemporal            | 46  | -37 | 3   | 0.02  | 0.271 | -2.33 | 0.24  | 0.004(.189)  | -0.030(.181) |
| VentralAttn-rhSuperiorTemporal          | 48  | -26 | 0   | 0.295 | 0.586 | -1.05 | -1.9  | -0.024(.187) | -0.039(.181) |
| VentralAttn-rhTriangularInferiorFrontal | 52  | 24  | 10  | 0.619 | 0.822 | -0.5  | -2.31 | 0.004(.272)  | -0.007(.272) |
| VentralAttn-rhOrbitalInferiorFrontal    | 48  | 38  | -9  | 0.323 | 0.604 | -0.99 | -1.96 | -0.001(.338) | -0.027(.330) |
| VentralAttn-rhOrbitalInferiorFrontal    | 45  | 31  | -6  | 0.232 | 0.518 | -1.2  | -1.74 | -0.053(.267) | -0.075(.239) |
| VentralAttn-rhInsula                    | 27  | 20  | -15 | 0.71  | 0.866 | -0.37 | -2.37 | -0.014(.228) | -0.021(.222) |
| VentralAttn-rhSuperiorTemporal          | 57  | -6  | -8  | 0.028 | 0.273 | -2.2  | -0.06 | -0.034(.199) | -0.067(.189) |
| VentralAttn-rhMiddleTemporal            | 47  | -22 | -8  | 0.358 | 0.636 | -0.92 | -2.01 | -0.005(.241) | -0.022(.233) |
| Visual-lhSuperiorOccipital              | -18 | -86 | 22  | 0.183 | 0.476 | -1.33 | -1.55 | 0.007(.208)  | -0.016(.212) |
| Visual-lhLingual                        | -17 | -60 | -5  | 0.646 | 0.842 | -0.46 | -2.33 | 0.033(.244)  | 0.025(.241)  |
| Visual-lhCalcarine                      | -11 | -83 | 4   | 0.156 | 0.465 | -1.42 | -1.46 | 0.137(.323)  | 0.102(.319)  |
| Visual-lhLingual                        | -22 | -58 | 2   | 0.171 | 0.475 | 1.37  | -1.51 | 0.021(.320)  | 0.058(.341)  |
| Visual-lhLingual                        | -10 | -58 | 3   | 0.052 | 0.298 | -1.95 | -0.57 | -0.003(.499) | -0.078(.482) |
| Visual-lhLingual                        | -17 | -46 | -4  | 0.05  | 0.298 | -1.96 | -0.56 | 0.039(.310)  | -0.006(.289) |
| Visual-lhSuperiorOccipital              | -14 | -77 | 27  | 0.146 | 0.464 | -1.45 | -1.4  | -0.006(.212) | -0.029(.199) |
| Visual-lhMiddleOccipital                | -31 | -84 | 9   | 0.439 | 0.704 | -0.77 | -2.13 | -0.032(.232) | -0.046(.235) |
| Visual-lhMiddleOccipital                | -34 | -87 | 0   | 0.238 | 0.524 | -1.18 | -1.74 | -0.027(.266) | -0.052(.263) |
| Visual-lhMiddleOccipital                | -43 | -68 | 10  | 0.301 | 0.586 | -1.03 | -1.91 | -0.025(.193) | -0.040(.183) |
| Visual-lhFusiform                       | -29 | -59 | -9  | 0.18  | 0.476 | -1.34 | -1.55 | -0.016(.222) | -0.040(.221) |
| Visual-lhFusiform                       | -34 | -64 | -16 | 0.651 | 0.842 | -0.45 | -2.33 | 0.015(.314)  | 0.005(.292)  |
| Visual-lhFusiform                       | -34 | -44 | -22 | 0.203 | 0.486 | -1.27 | -1.63 | -0.003(.248) | -0.029(.252) |
| Visual-lhCuneus                         | -5  | -88 | 19  | 0.846 | 0.919 | -0.19 | -2.41 | 0.027(.233)  | 0.024(.229)  |
| Visual-lhLingual                        | -9  | -78 | -4  | 0.869 | 0.938 | -0.16 | -2.42 | 0.096(.293)  | 0.092(.304)  |
| Visual-lhInferiorOccipital              | -41 | -72 | -6  | 0.197 | 0.486 | -1.29 | -1.63 | -0.049(.249) | -0.072(.230) |
| Visual-lhInferiorOccipital              | -25 | -97 | -8  | 0.754 | 0.88  | 0.31  | -2.34 | -0.053(.442) | -0.042(.431) |
| Visual-lhLingual                        | -23 | -82 | -12 | 0.837 | 0.915 | -0.21 | -2.4  | 0.068(.301)  | 0.064(.280)  |
| Visual-rhSuperiorOccipital              | 22  | -85 | 24  | 0.06  | 0.314 | -1.88 | -0.7  | -0.006(.221) | -0.039(.226) |
| Visual-rhFusiform                       | 22  | -46 | -10 | 0.132 | 0.454 | -1.5  | -1.32 | -0.019(.217) | -0.045(.221) |
| Visual-rhCalcarine                      | 16  | -74 | 9   | 0.722 | 0.867 | -0.36 | -2.38 | 0.070(.290)  | 0.061(.315)  |

|                           |    |     |     |       |       |       |       |              |              |
|---------------------------|----|-----|-----|-------|-------|-------|-------|--------------|--------------|
| Visual-rhLingual          | 20 | -45 | -4  | 0.815 | 0.904 | -0.23 | -2.4  | -0.011(.290) | -0.017(.295) |
| Visual-rhLingual          | 16 | -60 | -5  | 0.135 | 0.454 | -1.49 | -1.34 | 0.048(.271)  | 0.018(.247)  |
| Visual-rhInferiorParietal | 27 | -55 | 54  | 0.077 | 0.352 | 1.77  | -0.9  | 0.013(.227)  | 0.044(.223)  |
| Visual-rhCuneus           | 18 | -78 | 34  | 0.182 | 0.476 | -1.34 | -1.54 | -0.013(.211) | -0.034(.202) |
| Visual-rhCuneus           | 8  | -86 | 32  | 0.551 | 0.782 | -0.6  | -2.25 | -0.007(.250) | -0.019(.264) |
| Visual-rhMiddleOccipital  | 35 | -77 | 21  | 0.114 | 0.432 | -1.58 | -1.2  | -0.025(.231) | -0.055(.233) |
| Visual-rhMiddleOccipital  | 32 | -86 | 2   | 0.675 | 0.858 | -0.42 | -2.34 | -0.073(.281) | -0.083(.277) |
| Visual-rhMiddleTemporal   | 44 | -67 | 2   | 0.159 | 0.467 | -1.41 | -1.47 | -0.056(.207) | -0.077(.189) |
| Visual-rhInferiorTemporal | 47 | -52 | -12 | 0.099 | 0.402 | -1.65 | -1.1  | -0.050(.190) | -0.075(.197) |
| Visual-rhMiddleTemporal   | 49 | -54 | 9   | 0.508 | 0.749 | -0.66 | -2.22 | -0.005(.203) | -0.015(.189) |
| Visual-rhFusiform         | 31 | -46 | -6  | 0.078 | 0.352 | -1.76 | -0.91 | -0.075(.269) | -0.112(.273) |
| Visual-rhFusiform         | 27 | -69 | -7  | 0.635 | 0.837 | -0.47 | -2.32 | 0.007(.241)  | -0.002(.242) |
| Visual-rhFusiform         | 35 | -44 | -20 | 0.044 | 0.298 | -2.01 | -0.45 | -0.006(.272) | -0.047(.258) |
| Visual-rhCuneus           | 14 | -92 | 15  | 0.497 | 0.745 | -0.68 | -2.2  | 0.014(.273)  | 0.000(.252)  |
| Visual-rhLingual          | 10 | -74 | -2  | 0.818 | 0.904 | -0.23 | -2.41 | 0.066(.292)  | 0.061(.289)  |
| Visual-rhLingual          | 20 | -87 | -7  | 0.138 | 0.455 | -1.48 | -1.35 | 0.034(.332)  | -0.005(.328) |
| Visual-rhCuneus           | 5  | -80 | 23  | 0.994 | 0.996 | 0.01  | -2.44 | 0.039(.276)  | 0.039(.254)  |
| Visual-rhCuneus           | 15 | -70 | 23  | 0.324 | 0.604 | -0.99 | -1.96 | 0.030(.266)  | 0.012(.234)  |

\* = qFDR < .05. Bold = qFDR < .05 or  $\ln(\text{BF}_{10}) > 1.1$ . Note that x, y and z values here refer to the Montreal Neurological Institute (MNI) coordinates at the centroid of each cortical-surface region-of-interest (ROI) of a standard MNI brain. The label for each cortical-surface ROI is based on the Automated Anatomical Labeling (AAL) algorithm<sup>2</sup> via the mni2aal R package (<https://github.com/yunshiuang/label4MRI>). The label for each subcortical-volumetric ROI is based on Freesurfer's segmentation algorithm<sup>3</sup>, applied on each participant's individual brain space. Given that individual brain space was used for subcortical ROIs, their x, y and z coordinates are not given here. \* = qFDR < .05. Bold = qFDR < .05 or  $\ln(\text{BF}_{10}) > 1.1$ . The value of  $\ln(\text{BF}_{10}) > 1.1$  and  $< -1.2$  are interpreted as substantial evidence for the alternative (of there being a difference), and null hypotheses (of there being *no* difference), respectively.

**eTable 11.** Group differences between children with vs. without low mood during working-memory [Two-Back > Zero-Back] in the N-Back task-fMRI activation

| Name: Network-ROI                 | x   | y   | z   | $\rho$ | $q_{FDR}$ | t     | ln(BF <sub>10</sub> ) | With Low Mood<br>M(SD) | Without Low Mood<br>M(SD) |
|-----------------------------------|-----|-----|-----|--------|-----------|-------|-----------------------|------------------------|---------------------------|
| Auditory-lhHeschl                 | -32 | -29 | 16  | 0.25   | 0.994     | -1.15 | -1.81                 | -0.048(.204)           | -0.067(.215)              |
| Auditory-lhSupraMarginal          | -46 | -41 | 26  | 0.814  | 0.994     | -0.24 | -2.43                 | -0.067(.256)           | -0.072(.253)              |
| Auditory-lhOpercularRolandic      | -36 | -34 | 20  | 0.498  | 0.994     | 0.68  | -2.23                 | -0.097(.251)           | -0.084(.245)              |
| Auditory-lhSuperiorTemporal       | -53 | -21 | 5   | 0.435  | 0.994     | -0.78 | -2.15                 | -0.047(.193)           | -0.059(.191)              |
| Auditory-lhSuperiorTemporal       | -60 | -38 | 16  | 0.752  | 0.994     | -0.32 | -2.41                 | -0.043(.202)           | -0.048(.196)              |
| Auditory-lhSuperiorTemporal       | -59 | -30 | 11  | 0.638  | 0.994     | -0.47 | -2.34                 | -0.061(.189)           | -0.068(.181)              |
| Auditory-lhSuperiorTemporal       | -41 | -38 | 14  | 0.215  | 0.994     | -1.24 | -1.71                 | -0.047(.228)           | -0.068(.218)              |
| Auditory-lhInsula                 | -34 | -22 | 10  | 0.576  | 0.994     | 0.56  | -2.3                  | -0.058(.197)           | -0.050(.190)              |
| Auditory-lhInsula                 | -37 | -14 | 19  | 0.268  | 0.994     | -1.11 | -1.87                 | -0.100(.239)           | -0.120(.237)              |
| Auditory-lhOpercularRolandic      | -52 | -14 | 15  | 0.964  | 0.994     | -0.04 | -2.46                 | -0.128(.270)           | -0.129(.262)              |
| Auditory-lhSupraMarginal          | -51 | -22 | 19  | 0.668  | 0.994     | 0.43  | -2.38                 | -0.116(.228)           | -0.109(.220)              |
| Auditory-lhSuperiorTemporal       | -54 | -1  | -1  | 0.341  | 0.994     | -0.95 | -2                    | -0.044(.166)           | -0.057(.170)              |
| Auditory-rhInsula                 | 34  | -22 | 13  | 0.863  | 0.994     | -0.17 | -2.45                 | -0.062(.221)           | -0.065(.206)              |
| Auditory-rhOpercularRolandic      | 36  | -31 | 19  | 0.487  | 0.994     | 0.69  | -2.22                 | -0.098(.236)           | -0.085(.227)              |
| Auditory-rhSuperiorTemporal       | 54  | -16 | 5   | 0.253  | 0.994     | -1.14 | -1.81                 | -0.035(.182)           | -0.052(.187)              |
| Auditory-rhSuperiorTemporal       | 59  | -39 | 15  | 0.534  | 0.994     | -0.62 | -2.27                 | -0.017(.183)           | -0.026(.184)              |
| Auditory-rhSuperiorTemporal       | 62  | -24 | 1   | 0.943  | 0.994     | 0.07  | -2.45                 | -0.056(.219)           | -0.054(.224)              |
| Auditory-rhSuperiorTemporal       | 60  | -25 | 10  | 0.986  | 0.994     | 0.02  | -2.45                 | -0.067(.190)           | -0.067(.187)              |
| Auditory-rhInsula                 | 38  | -12 | 20  | 0.736  | 0.994     | -0.34 | -2.4                  | -0.133(.248)           | -0.139(.248)              |
| Auditory-rhInsula                 | 37  | -10 | 12  | 0.724  | 0.994     | -0.35 | -2.4                  | -0.068(.237)           | -0.075(.227)              |
| Auditory-rhOpercularRolandic      | 61  | -2  | 11  | 0.172  | 0.954     | 1.37  | -1.55                 | -0.152(.265)           | -0.125(.258)              |
| Auditory-rhOpercularRolandic      | 54  | -14 | 17  | 0.637  | 0.994     | -0.47 | -2.34                 | -0.124(.248)           | -0.133(.242)              |
| Auditory-rhSuperiorTemporal       | 40  | -22 | 3   | 0.142  | 0.906     | -1.47 | -1.39                 | -0.075(.362)           | -0.116(.349)              |
| Auditory-rhSuperiorTemporal       | 56  | 2   | -2  | 0.493  | 0.994     | 0.69  | -2.21                 | -0.069(.154)           | -0.060(.158)              |
| CinguloOperc-lhMiddleCingulum     | -17 | -36 | 43  | 0.805  | 0.994     | 0.25  | -2.42                 | -0.051(.166)           | -0.048(.166)              |
| CinguloOperc-lhMiddleCingulum     | -9  | 0   | 43  | 0.436  | 0.994     | 0.78  | -2.17                 | -0.019(.167)           | -0.010(.158)              |
| CinguloOperc-lhMiddleCingulum     | -8  | 15  | 34  | 0.177  | 0.954     | -1.35 | -1.57                 | 0.056(.178)            | 0.037(.184)               |
| CinguloOperc-lhAnteriorCingulum   | -9  | 25  | 28  | 0.526  | 0.994     | -0.63 | -2.27                 | 0.111(.267)            | 0.098(.254)               |
| CinguloOperc-lhSupplementaryMotor | -8  | -9  | 63  | 0.59   | 0.994     | -0.54 | -2.32                 | -0.022(.158)           | -0.028(.150)              |
| CinguloOperc-lhPrecentral         | -42 | -4  | 47  | 0.267  | 0.994     | 1.11  | -1.86                 | 0.051(.231)            | 0.070(.224)               |
| CinguloOperc-lhSupraMarginal      | -58 | -41 | 36  | 0.345  | 0.994     | 0.94  | -2.03                 | 0.011(.204)            | 0.026(.209)               |
| CinguloOperc-lhSuperiorTemporal   | -39 | -16 | -5  | 0.983  | 0.994     | -0.02 | -2.46                 | -0.066(.185)           | -0.066(.186)              |
| CinguloOperc-lhInsula             | -39 | -2  | -12 | 0.806  | 0.994     | -0.25 | -2.43                 | -0.064(.180)           | -0.067(.171)              |
| CinguloOperc-lhInsula             | -38 | 3   | 12  | 0.583  | 0.994     | 0.55  | -2.31                 | -0.043(.191)           | -0.036(.179)              |
| CinguloOperc-lhInsula             | -37 | 1   | 6   | 0.777  | 0.994     | 0.28  | -2.42                 | -0.055(.180)           | -0.051(.178)              |
| CinguloOperc-lhInsula             | -37 | 9   | -1  | 0.533  | 0.994     | 0.62  | -2.28                 | -0.007(.204)           | 0.002(.193)               |
| CinguloOperc-lhInsula             | -29 | 24  | 8   | 0.83   | 0.994     | 0.22  | -2.45                 | 0.106(.237)            | 0.110(.225)               |

|                                             |     |     |     |       |       |       |       |              |              |
|---------------------------------------------|-----|-----|-----|-------|-------|-------|-------|--------------|--------------|
| CinguloOperc-<br>lhOpercularRolandic        | -60 | -4  | 9   | 0.339 | 0.994 | 0.96  | -2.01 | -0.137(.253) | -0.117(.265) |
| CinguloOperc-<br>lhSuperiorTemporal         | -55 | -32 | 23  | 0.874 | 0.994 | -0.16 | -2.44 | -0.117(.213) | -0.120(.212) |
| CinguloOperc-<br>lhSupraMarginal            | -59 | -24 | 31  | 0.487 | 0.994 | 0.69  | -2.24 | -0.081(.195) | -0.070(.199) |
| CinguloOperc-<br>lhOpercularRolandic        | -52 | -1  | 5   | 0.228 | 0.994 | 1.21  | -1.75 | -0.109(.207) | -0.090(.209) |
| CinguloOperc-<br>lhOpercularInferiorFrontal | -49 | 8   | 11  | 0.399 | 0.994 | 0.84  | -2.12 | 0.025(.225)  | 0.038(.207)  |
| CinguloOperc-lhMiddleFrontal                | -27 | 47  | 21  | 0.182 | 0.954 | -1.34 | -1.59 | 0.089(.261)  | 0.062(.271)  |
| CinguloOperc-lhMiddleFrontal                | -29 | 38  | 28  | 0.789 | 0.994 | -0.27 | -2.42 | 0.030(.227)  | 0.025(.231)  |
| CinguloOperc-<br>rhMiddleCingulum           | 16  | -33 | 43  | 0.343 | 0.994 | -0.95 | -2.01 | -0.014(.157) | -0.026(.160) |
| CinguloOperc-<br>rhSupplementaryMotor       | 7   | 5   | 56  | 0.021 | 0.837 | 2.32  | 0.17  | 0.015(.230)  | 0.052(.207)  |
| CinguloOperc-<br>rhMiddleCingulum           | 9   | 4   | 40  | 0.481 | 0.994 | 0.7   | -2.21 | -0.022(.161) | -0.013(.164) |
| CinguloOperc-<br>rhMiddleCingulum           | 9   | 11  | 46  | 0.102 | 0.906 | 1.64  | -1.15 | 0.093(.247)  | 0.122(.229)  |
| CinguloOperc-<br>rhMiddleCingulum           | 6   | 22  | 32  | 0.311 | 0.994 | -1.01 | -1.97 | 0.098(.213)  | 0.082(.199)  |
| CinguloOperc-<br>rhSupplementaryMotor       | 16  | 1   | 68  | 0.701 | 0.994 | 0.38  | -2.38 | 0.049(.165)  | 0.054(.173)  |
| CinguloOperc-<br>rhSupplementaryMotor       | 8   | -6  | 64  | 0.284 | 0.994 | -1.07 | -1.89 | -0.015(.160) | -0.027(.152) |
| CinguloOperc-rhPrecentral                   | 42  | -2  | 47  | 0.538 | 0.994 | 0.62  | -2.28 | 0.050(.237)  | 0.060(.210)  |
| CinguloOperc-<br>rhSupraMarginal            | 58  | -40 | 35  | 0.923 | 0.994 | 0.1   | -2.48 | 0.124(.220)  | 0.126(.227)  |
| CinguloOperc-<br>rhSupraMarginal            | 55  | -27 | 30  | 0.559 | 0.994 | -0.58 | -2.29 | -0.067(.192) | -0.075(.181) |
| CinguloOperc-rhInsula                       | 39  | -14 | -5  | 0.422 | 0.994 | -0.8  | -2.14 | -0.057(.175) | -0.067(.176) |
| CinguloOperc-rhInsula                       | 40  | 1   | -13 | 0.683 | 0.994 | 0.41  | -2.36 | -0.078(.185) | -0.072(.196) |
| CinguloOperc-rhInsula                       | 37  | 5   | 13  | 0.861 | 0.994 | 0.17  | -2.44 | -0.084(.196) | -0.082(.196) |
| CinguloOperc-rhInsula                       | 40  | 10  | -2  | 0.307 | 0.994 | 1.02  | -1.94 | 0.005(.192)  | 0.020(.181)  |
| CinguloOperc-rhInsula                       | 36  | 6   | 6   | 0.41  | 0.994 | -0.82 | -2.13 | -0.020(.187) | -0.031(.173) |
| CinguloOperc-rhInsula                       | 34  | 23  | 4   | 0.831 | 0.994 | 0.21  | -2.45 | 0.202(.269)  | 0.206(.278)  |
| CinguloOperc-rhInsula                       | 34  | 24  | 10  | 0.107 | 0.906 | 1.61  | -1.2  | 0.083(.257)  | 0.112(.241)  |
| CinguloOperc-<br>rhOpercularRolandic        | 50  | 3   | 4   | 0.34  | 0.994 | 0.95  | -2.02 | -0.057(.200) | -0.043(.182) |
| CinguloOperc-<br>rhSuperiorFrontal          | 24  | 51  | 24  | 0.716 | 0.994 | -0.36 | -2.39 | 0.050(.260)  | 0.042(.259)  |
| CinguloOperc-<br>rhMiddleFrontal            | 31  | 40  | 26  | 0.13  | 0.906 | 1.52  | -1.34 | 0.082(.224)  | 0.108(.228)  |
| CinguloParietal-<br>lhMiddleCingulum        | -6  | -26 | 28  | 0.913 | 0.994 | 0.11  | -2.46 | 0.042(.251)  | 0.044(.268)  |
| CinguloParietal-lhPrecuneus                 | -13 | -65 | 32  | 0.632 | 0.994 | -0.48 | -2.34 | -0.003(.285) | -0.013(.257) |
| CinguloParietal-lhPrecuneus                 | -11 | -73 | 43  | 0.824 | 0.994 | 0.22  | -2.44 | 0.049(.257)  | 0.053(.248)  |
| CinguloParietal-<br>rhMiddleCingulum        | 8   | -27 | 28  | 0.615 | 0.994 | 0.5   | -2.34 | 0.032(.246)  | 0.042(.265)  |
| CinguloParietal-rhCuneus                    | 16  | -70 | 40  | 0.862 | 0.994 | -0.17 | -2.43 | 0.045(.234)  | 0.042(.235)  |

|                                        |            |           |           |              |              |              |             |                     |                     |
|----------------------------------------|------------|-----------|-----------|--------------|--------------|--------------|-------------|---------------------|---------------------|
| Default-lhPrecuneus                    | -11        | -52       | 36        | 0.04         | 0.837        | -2.05        | -0.41       | 0.015(.199)         | -0.015(.193)        |
| Default-lhSuperiorFrontal              | -12        | 27        | 57        | 0.357        | 0.994        | -0.92        | -2.05       | 0.017(.160)         | 0.006(.163)         |
| Default-lhAngular                      | -47        | -58       | 31        | 0.482        | 0.994        | -0.7         | -2.23       | 0.069(.206)         | 0.058(.201)         |
| Default-lhMedialSuperiorFrontal        | -6         | 42        | 35        | 0.226        | 0.994        | -1.21        | -1.76       | 0.033(.232)         | 0.013(.206)         |
| Default-lhMiddleCingulum               | -2         | -18       | 39        | 0.011        | 0.818        | -2.54        | 0.69        | -0.003(.192)        | -0.042(.204)        |
| Default-lhSuperiorFrontal              | -20        | 30        | 46        | 0.315        | 0.994        | -1.01        | -1.96       | 0.037(.177)         | 0.024(.174)         |
| Default-lhMiddleOccipital              | -39        | -74       | 38        | 0.595        | 0.994        | -0.53        | -2.32       | 0.049(.209)         | 0.041(.219)         |
| Default-lhOrbitalSuperiorFrontal       | -28        | 54        | 0         | 0.777        | 0.994        | -0.28        | -2.42       | 0.102(.393)         | 0.093(.383)         |
| Default-lhOrbitalMedialFrontal         | -6         | 55        | -11       | 0.923        | 0.994        | 0.1          | -2.43       | -0.156(.428)        | -0.153(.402)        |
| Default-lhOrbitalMedialFrontal         | -7         | 38        | -9        | 0.078        | 0.906        | -1.77        | -0.94       | -0.133(.366)        | -0.182(.362)        |
| Default-lhMiddleTemporal               | -63        | -29       | -7        | 0.974        | 0.994        | 0.03         | -2.43       | 0.013(.315)         | 0.014(.315)         |
| Default-lhMiddleTemporal               | -53        | -11       | -16       | 0.031        | 0.837        | -2.16        | -0.18       | -0.036(.232)        | -0.075(.231)        |
| <b>Default-lhSuperiorFrontal</b>       | <b>-16</b> | <b>49</b> | <b>37</b> | <b>0.005</b> | <b>0.722</b> | <b>-2.78</b> | <b>1.33</b> | <b>-0.028(.198)</b> | <b>-0.068(.190)</b> |
| Default-lhSuperiorFrontal              | -20        | 56        | 28        | 0.91         | 0.994        | 0.11         | -2.45       | -0.039(.248)        | -0.037(.227)        |
| Default-lhMedialSuperiorFrontal        | -6         | 55        | 18        | 0.553        | 0.994        | -0.59        | -2.29       | -0.101(.236)        | -0.111(.209)        |
| Default-lhSuperiorFrontal              | -16        | 65        | 14        | 0.236        | 0.994        | -1.18        | -1.77       | -0.017(.331)        | -0.047(.330)        |
| Default-lhAnteriorCingulum             | -6         | 45        | 6         | 0.371        | 0.994        | -0.89        | -2.08       | -0.052(.239)        | -0.067(.219)        |
| Default-lhMiddleFrontal                | -26        | 27        | 39        | 0.805        | 0.994        | 0.25         | -2.44       | 0.055(.230)         | 0.059(.226)         |
| Default-lhMiddleFrontal                | -29        | 17        | 51        | 0.336        | 0.994        | 0.96         | -2.01       | 0.107(.225)         | 0.124(.237)         |
| Default-lhMiddleFrontal                | -42        | 16        | 48        | 0.328        | 0.994        | -0.98        | -1.99       | 0.099(.212)         | 0.084(.212)         |
| Default-rhPrecuneus                    | 12         | -52       | 34        | 0.443        | 0.994        | -0.77        | -2.17       | 0.024(.208)         | 0.013(.193)         |
| Default-rhSupplementaryMotor           | 12         | 22        | 60        | 0.428        | 0.994        | -0.79        | -2.15       | 0.024(.156)         | 0.014(.159)         |
| Default-rhAnteriorCingulum             | 8          | 44        | 6         | 0.08         | 0.906        | -1.75        | -0.96       | -0.007(.223)        | -0.035(.212)        |
| Default-rhMiddleCingulum               | 3          | -20       | 38        | 0.037        | 0.837        | -2.09        | -0.33       | 0.009(.232)         | -0.026(.219)        |
| Default-rhSuperiorFrontal              | 22         | 21        | 46        | 0.972        | 0.994        | 0.03         | -2.48       | 0.117(.209)         | 0.117(.203)         |
| Default-rhAngular                      | 49         | -53       | 29        | 0.127        | 0.906        | -1.53        | -1.33       | 0.103(.210)         | 0.078(.222)         |
| Default-rhMiddleTemporal               | 62         | -26       | -6        | 0.877        | 0.994        | -0.15        | -2.44       | 0.048(.239)         | 0.045(.264)         |
| Default-rhPrecuneus                    | 7          | -69       | 50        | 0.873        | 0.994        | 0.16         | -2.45       | 0.313(.382)         | 0.317(.374)         |
| Default-rhAngular                      | 46         | -67       | 36        | 0.398        | 0.994        | 0.85         | -2.1        | 0.063(.185)         | 0.076(.205)         |
| Default-rhOrbitalMedialFrontal         | 5          | 65        | -7        | 0.128        | 0.906        | 1.52         | -1.3        | -0.087(.451)        | -0.032(.458)        |
| Default-rhOrbitalMedialFrontal         | 7          | 48        | -10       | 0.343        | 0.994        | 0.95         | -2.01       | -0.175(.387)        | -0.145(.403)        |
| Default-rhMiddleTemporal               | 58         | -7        | -16       | 0.91         | 0.994        | 0.11         | -2.43       | -0.048(.248)        | -0.046(.233)        |
| Default-rhMiddleFrontal                | 21         | 33        | 42        | 0.804        | 0.994        | 0.25         | -2.43       | 0.027(.195)         | 0.030(.188)         |
| Default-rhSuperiorFrontal              | 21         | 43        | 35        | 0.463        | 0.994        | -0.73        | -2.19       | 0.027(.220)         | 0.015(.211)         |
| Default-rhSuperiorFrontal              | 16         | 61        | 20        | 0.978        | 0.994        | 0.03         | -2.45       | -0.025(.273)        | -0.025(.255)        |
| Default-rhMedialSuperiorFrontal        | 8          | 54        | 14        | 0.016        | 0.818        | -2.4         | 0.36        | -0.048(.241)        | -0.089(.218)        |
| <b>Default-rhMedialSuperiorFrontal</b> | <b>6</b>   | <b>55</b> | <b>29</b> | <b>0.001</b> | <b>0.423</b> | <b>-3.24</b> | <b>2.69</b> | <b>-0.038(.227)</b> | <b>-0.094(.222)</b> |
| Default-rhSuperiorFrontal              | 14         | 47        | 42        | 0.036        | 0.837        | -2.09        | -0.31       | -0.023(.203)        | -0.054(.193)        |
| Default-rhMedialSuperiorFrontal        | 7          | 44        | 35        | 0.05         | 0.906        | -1.96        | -0.58       | 0.031(.196)         | 0.002(.194)         |
| Default-rhMiddleFrontal                | 31         | 19        | 49        | 0.996        | 0.996        | 0.01         | -2.47       | 0.144(.236)         | 0.144(.244)         |

|                                            |     |     |     |       |       |       |       |              |              |
|--------------------------------------------|-----|-----|-----|-------|-------|-------|-------|--------------|--------------|
| Default-rhSuperiorTemporal                 | 54  | 1   | -13 | 0.108 | 0.906 | 1.61  | -1.18 | -0.082(.201) | -0.057(.200) |
| DorsalAttn-lhPrecentral                    | -27 | -7  | 46  | 0.078 | 0.906 | 1.76  | -0.96 | 0.087(.237)  | 0.116(.218)  |
| DorsalAttn-lhMiddleFrontal                 | -27 | 2   | 53  | 0.953 | 0.994 | 0.06  | -2.46 | 0.190(.238)  | 0.191(.231)  |
| DorsalAttn-lhSuperiorFrontal               | -20 | 6   | 56  | 0.081 | 0.906 | 1.75  | -0.98 | 0.150(.223)  | 0.182(.243)  |
| DorsalAttn-lhSuperiorFrontal               | -21 | 0   | 63  | 0.866 | 0.994 | 0.17  | -2.43 | 0.084(.181)  | 0.086(.183)  |
| DorsalAttn-lhInferiorParietal              | -31 | -49 | 47  | 0.644 | 0.994 | 0.46  | -2.37 | 0.124(.222)  | 0.132(.231)  |
| DorsalAttn-lhInferiorParietal              | -43 | -45 | 43  | 0.315 | 0.994 | 1.01  | -1.97 | 0.192(.250)  | 0.212(.262)  |
| DorsalAttn-lhInferiorParietal              | -52 | -31 | 40  | 0.978 | 0.994 | 0.03  | -2.47 | 0.022(.211)  | 0.022(.206)  |
| DorsalAttn-lhTriangularInferiorFrontal     | -44 | 36  | 8   | 0.379 | 0.994 | 0.88  | -2.09 | -0.046(.270) | -0.029(.254) |
| DorsalAttn-lhSuperiorParietal              | -20 | -65 | 51  | 0.97  | 0.994 | -0.04 | -2.47 | 0.091(.248)  | 0.090(.237)  |
| DorsalAttn-lhMiddleOccipital               | -26 | -65 | 32  | 0.841 | 0.994 | -0.2  | -2.46 | 0.037(.224)  | 0.033(.225)  |
| DorsalAttn-lhPrecuneus                     | -10 | -57 | 60  | 0.971 | 0.994 | -0.04 | -2.47 | 0.068(.212)  | 0.068(.211)  |
| DorsalAttn-lhPrecuneus                     | -7  | -64 | 55  | 0.393 | 0.994 | 0.85  | -2.11 | 0.258(.321)  | 0.280(.330)  |
| DorsalAttn-lhMiddleOccipital               | -30 | -74 | 36  | 0.337 | 0.994 | -0.96 | -2.03 | 0.109(.260)  | 0.090(.265)  |
| DorsalAttn-lhInferiorTemporal              | -46 | -58 | -8  | 0.987 | 0.994 | 0.02  | -2.44 | -0.057(.187) | -0.057(.184) |
| DorsalAttn-lhPrecentral                    | -45 | 3   | 32  | 0.43  | 0.994 | 0.79  | -2.17 | 0.065(.246)  | 0.079(.231)  |
| DorsalAttn-lhPrecentral                    | -35 | 6   | 34  | 0.391 | 0.994 | 0.86  | -2.1  | 0.075(.268)  | 0.095(.303)  |
| DorsalAttn-lhMiddleFrontal                 | -38 | 38  | 17  | 0.716 | 0.994 | 0.36  | -2.4  | 0.034(.284)  | 0.042(.269)  |
| DorsalAttn-lhOpercularInferiorFrontal      | -42 | 9   | 22  | 0.62  | 0.994 | 0.5   | -2.35 | 0.056(.266)  | 0.066(.267)  |
| DorsalAttn-lhMiddleFrontal                 | -36 | 33  | 32  | 0.647 | 0.994 | -0.46 | -2.37 | 0.121(.264)  | 0.113(.249)  |
| DorsalAttn-rhPrecuneus                     | 10  | -57 | 58  | 0.149 | 0.906 | 1.44  | -1.44 | 0.112(.246)  | 0.139(.238)  |
| DorsalAttn-rhMiddleFrontal                 | 29  | 2   | 52  | 0.552 | 0.994 | 0.59  | -2.3  | 0.181(.265)  | 0.192(.234)  |
| DorsalAttn-rhPrecentral                    | 30  | -8  | 47  | 0.268 | 0.994 | 1.11  | -1.86 | 0.097(.236)  | 0.117(.237)  |
| DorsalAttn-rhSuperiorFrontal               | 23  | 6   | 58  | 0.037 | 0.837 | 2.09  | -0.35 | 0.176(.260)  | 0.214(.246)  |
| DorsalAttn-rhInferiorParietal              | 39  | -43 | 40  | 0.436 | 0.994 | 0.78  | -2.18 | 0.238(.311)  | 0.256(.300)  |
| DorsalAttn-rhMiddleFrontal                 | 37  | 38  | 13  | 0.308 | 0.994 | -1.02 | -1.95 | 0.074(.249)  | 0.055(.246)  |
| DorsalAttn-rhTriangularInferiorFrontal     | 48  | 38  | 2   | 0.137 | 0.906 | 1.49  | -1.38 | -0.083(.326) | -0.047(.314) |
| DorsalAttn-rhSuperiorParietal              | 23  | -66 | 52  | 0.896 | 0.994 | -0.13 | -2.46 | 0.121(.262)  | 0.118(.253)  |
| DorsalAttn-rhMiddleOccipital               | 32  | -64 | 34  | 0.733 | 0.994 | 0.34  | -2.41 | 0.057(.220)  | 0.063(.227)  |
| DorsalAttn-rhInferiorParietal              | 34  | -48 | 49  | 0.729 | 0.994 | 0.35  | -2.4  | 0.149(.244)  | 0.155(.258)  |
| DorsalAttn-rhMiddleTemporal                | 57  | -54 | -1  | 0.234 | 0.994 | 1.19  | -1.77 | 0.011(.258)  | 0.033(.243)  |
| DorsalAttn-rhPrecentral                    | 47  | 2   | 38  | 0.055 | 0.906 | 1.92  | -0.67 | 0.022(.258)  | 0.057(.239)  |
| DorsalAttn-rhOpercularInferiorFrontal      | 47  | 8   | 19  | 0.423 | 0.994 | 0.8   | -2.16 | 0.061(.211)  | 0.074(.204)  |
| FrontoParietal-lhMiddleFrontal             | -38 | 49  | 10  | 0.689 | 0.994 | -0.4  | -2.39 | 0.142(.329)  | 0.132(.331)  |
| FrontoParietal-lhInferiorTemporal          | -56 | -48 | -9  | 0.569 | 0.994 | 0.57  | -2.3  | -0.025(.256) | -0.014(.257) |
| FrontoParietal-lhMedialSuperiorFrontal     | -6  | 29  | 44  | 0.866 | 0.994 | 0.17  | -2.45 | 0.125(.236)  | 0.128(.212)  |
| FrontoParietal-lhOrbitalMiddleFrontal      | -40 | 50  | -5  | 0.803 | 0.994 | 0.25  | -2.41 | 0.090(.383)  | 0.097(.385)  |
| FrontoParietal-lhAngular                   | -34 | -61 | 42  | 0.399 | 0.994 | -0.84 | -2.13 | 0.165(.256)  | 0.148(.270)  |
| FrontoParietal-lhOpercularInferiorFrontal  | -43 | 19  | 34  | 0.842 | 0.994 | -0.2  | -2.44 | 0.175(.312)  | 0.170(.318)  |
| FrontoParietal-lhTriangularInferiorFrontal | -40 | 24  | 23  | 0.107 | 0.906 | -1.61 | -1.2  | 0.097(.265)  | 0.064(.270)  |

|                                            |     |     |     |       |       |       |       |               |               |
|--------------------------------------------|-----|-----|-----|-------|-------|-------|-------|---------------|---------------|
| FrontoParietal-lhSuperiorFrontal           | -21 | 63  | 2   | 0.466 | 0.994 | -0.73 | -2.19 | 0.080(.331)   | 0.059(.375)   |
| FrontoParietal-lhMiddleFrontal             | -29 | 51  | 10  | 0.889 | 0.994 | 0.14  | -2.46 | 0.135(.351)   | 0.139(.332)   |
| FrontoParietal-rhSupraMarginal             | 48  | -42 | 42  | 0.801 | 0.994 | 0.25  | -2.44 | 0.239(.269)   | 0.244(.270)   |
| FrontoParietal-rhMiddleFrontal             | 38  | 46  | 8   | 0.899 | 0.994 | -0.13 | -2.46 | 0.086(.292)   | 0.083(.294)   |
| FrontoParietal-rhInferiorTemporal          | 60  | -41 | -11 | 0.745 | 0.994 | 0.33  | -2.4  | 0.060(.249)   | 0.067(.268)   |
| FrontoParietal-rhSupplementaryMotor        | 7   | 26  | 47  | 0.819 | 0.994 | -0.23 | -2.45 | 0.138(.222)   | 0.134(.222)   |
| FrontoParietal-rhOrbitalInferiorFrontal    | 43  | 48  | -5  | 0.839 | 0.994 | -0.2  | -2.4  | 0.110(.343)   | 0.104(.357)   |
| FrontoParietal-rhInferiorParietal          | 42  | -54 | 44  | 0.257 | 0.994 | 1.13  | -1.84 | 0.152(.267)   | 0.177(.295)   |
| FrontoParietal-rhAngular                   | 36  | -57 | 45  | 0.026 | 0.837 | 2.23  | -0.02 | 0.116(.289)   | 0.168(.305)   |
| FrontoParietal-rhMiddleFrontal             | 38  | 29  | 36  | 0.931 | 0.994 | 0.09  | -2.48 | 0.184(.275)   | 0.186(.272)   |
| FrontoParietal-rhTriangularInferiorFrontal | 42  | 29  | 22  | 0.072 | 0.906 | -1.8  | -0.88 | 0.075(.263)   | 0.040(.257)   |
| FrontoParietal-rhTriangularInferiorFrontal | 39  | 19  | 26  | 0.744 | 0.994 | -0.33 | -2.42 | 0.037(.282)   | 0.030(.281)   |
| FrontoParietal-rhOrbitalSuperiorFrontal    | 28  | 57  | -5  | 0.88  | 0.994 | -0.15 | -2.43 | 0.100(.396)   | 0.095(.404)   |
| FrontoParietal-rhSuperiorFrontal           | 24  | 59  | 5   | 0.882 | 0.994 | -0.15 | -2.44 | 0.073(.327)   | 0.070(.324)   |
| FrontoParietal-rhSuperiorFrontal           | 31  | 52  | 10  | 0.52  | 0.994 | 0.64  | -2.26 | 0.103(.327)   | 0.119(.329)   |
| FrontoParietal-rhMiddleFrontal             | 42  | 20  | 48  | 0.799 | 0.994 | 0.25  | -2.43 | 0.119(.220)   | 0.124(.225)   |
| FrontoParietal-rhMiddleFrontal             | 39  | 10  | 43  | 0.381 | 0.994 | -0.88 | -2.09 | 0.109(.245)   | 0.092(.245)   |
| None-lhSuperiorPoleTemporal                | -29 | 5   | -27 | 0.495 | 0.994 | -0.68 | -2.2  | -0.054(.253)  | -0.068(.255)  |
| None-lhParaHippocampal                     | -29 | -36 | -8  | 0.842 | 0.994 | -0.2  | -2.42 | -0.029(.165)  | -0.032(.154)  |
| None-lhLingual                             | -18 | -39 | -1  | 0.422 | 0.994 | -0.8  | -2.14 | -0.013(.203)  | -0.025(.203)  |
| None-lhMiddlePoleTemporal                  | -34 | 17  | -32 | 0.562 | 0.994 | 0.58  | -2.27 | -0.083(.217)  | -0.073(.215)  |
| None-lhOrbitalSuperiorFrontal              | -23 | 61  | -7  | 0.764 | 0.994 | 0.3   | -2.37 | 0.058(.539)   | 0.071(.561)   |
| None-lhAmygdala                            | -32 | 3   | -17 | 0.442 | 0.994 | 0.77  | -2.17 | -0.112(.333)  | -0.093(.323)  |
| None-lhOrbitalInferiorFrontal              | -35 | 36  | -10 | 0.127 | 0.906 | -1.52 | -1.33 | -0.172(.384)  | -0.213(.345)  |
| None-lhOrbitalMiddleFrontal                | -22 | 32  | -14 | 0.179 | 0.954 | -1.34 | -1.56 | -0.038(.253)  | -0.066(.270)  |
| None-lhOrbitalSuperiorFrontal              | -24 | 52  | -13 | 0.251 | 0.994 | -1.15 | -1.79 | 0.164(.501)   | 0.122(.472)   |
| None-lhOrbitalSuperiorFrontal              | -17 | 47  | -18 | 0.176 | 0.954 | 1.35  | -1.53 | 0.018(.616)   | 0.080(.568)   |
| None-lhOrbitalSuperiorFrontal              | -13 | 24  | -16 | 0.801 | 0.994 | -0.25 | -2.41 | 0.043(.612)   | 0.032(.551)   |
| None-lhRectus                              | -9  | 46  | -21 | 0.824 | 0.994 | 0.22  | -2.42 | -0.032(1.242) | -0.009(1.320) |
| None-lhRectus                              | -2  | 34  | -26 | 0.14  | 0.906 | -1.47 | -1.4  | 0.094(1.691)  | -0.092(1.649) |
| None-lhInferiorTemporal                    | -53 | -13 | -29 | 0.519 | 0.994 | -0.64 | -2.24 | -0.017(.559)  | -0.045(.541)  |

|                                      |           |           |            |              |              |              |             |                    |                     |
|--------------------------------------|-----------|-----------|------------|--------------|--------------|--------------|-------------|--------------------|---------------------|
| None-lhInferiorTemporal              | -45       | 9         | -37        | 0.921        | 0.994        | 0.1          | -2.42       | -0.096(.208)       | -0.094(.209)        |
| None-lhInferiorTemporal              | -55       | -40       | -16        | 0.245        | 0.994        | 1.16         | -1.77       | 0.017(.344)        | 0.048(.340)         |
| None-lhFusiform                      | -32       | -4        | -45        | 0.929        | 0.994        | -0.09        | -2.43       | -0.073(.372)       | -0.076(.418)        |
| None-lhInferiorTemporal              | -39       | -13       | -27        | 0.199        | 0.994        | -1.28        | -1.61       | -0.042(.294)       | -0.070(.268)        |
| None-lhParaHippocampal               | -20       | -13       | -24        | 0.788        | 0.994        | -0.27        | -2.39       | -0.042(.300)       | -0.048(.280)        |
| None-lhParaHippocampal               | -22       | -22       | -17        | 0.858        | 0.994        | -0.18        | -2.44       | -0.052(.287)       | -0.056(.250)        |
| None-lhSuperiorPoleTemporal          | -51       | 7         | -20        | 0.456        | 0.994        | -0.75        | -2.19       | -0.058(.199)       | -0.069(.189)        |
| None-rhSuperiorPoleTemporal          | 32        | 14        | -30        | 0.499        | 0.994        | -0.68        | -2.21       | -0.039(.223)       | -0.051(.226)        |
| None-rhParaHippocampal               | 25        | -36       | -5         | 0.832        | 0.994        | -0.21        | -2.43       | -0.010(.170)       | -0.012(.172)        |
| None-rhParaHippocampal               | 19        | -30       | -10        | 0.227        | 0.994        | -1.21        | -1.74       | -0.023(.336)       | -0.056(.356)        |
| None-rhRectus                        | 3         | 19        | -23        | 0.349        | 0.994        | -0.94        | -2.03       | 0.024(.706)        | -0.028(.737)        |
| None-rhOrbitalInferiorFrontal        | 35        | 37        | -8         | 0.689        | 0.994        | -0.4         | -2.39       | -0.137(.300)       | -0.146(.304)        |
| None-rhOlfactory                     | 25        | 9         | -16        | 0.126        | 0.906        | -1.53        | -1.31       | -0.040(.333)       | -0.078(.313)        |
| <b>None-rhOrbitalSuperiorFrontal</b> | <b>21</b> | <b>30</b> | <b>-15</b> | <b>0.006</b> | <b>0.722</b> | <b>-2.74</b> | <b>1.22</b> | <b>0.007(.271)</b> | <b>-0.051(.274)</b> |
| None-rhOrbitalSuperiorFrontal        | 22        | 51        | -14        | 0.365        | 0.994        | -0.91        | -2.04       | 0.197(.525)        | 0.162(.492)         |
| None-rhOrbitalSuperiorFrontal        | 12        | 26        | -25        | 0.507        | 0.994        | -0.66        | -2.24       | 0.056(1.192)       | -0.007(1.240)       |
| None-rhRectus                        | 14        | 20        | -15        | 0.549        | 0.994        | -0.6         | -2.28       | 0.090(.398)        | 0.072(.389)         |
| None-rhRectus                        | 11        | 39        | -20        | 0.49         | 0.994        | 0.69         | -2.2        | -0.029(.993)       | 0.021(.904)         |
| None-lhRectus                        | 2         | 39        | -26        | 0.928        | 0.994        | 0.09         | -2.43       | -0.045(1.464)      | -0.034(1.556)       |
| None-rhInferiorTemporal              | 62        | -26       | -16        | 0.587        | 0.994        | -0.54        | -2.31       | 0.150(.464)        | 0.130(.470)         |
| None-rhInferiorTemporal              | 55        | -8        | -27        | 0.115        | 0.906        | -1.58        | -1.22       | -0.013(.440)       | -0.064(.411)        |
| None-rhMiddlePoleTemporal            | 45        | 14        | -30        | 0.233        | 0.994        | -1.19        | -1.75       | -0.062(.190)       | -0.079(.179)        |
| None-rhParaHippocampal               | 20        | -21       | -22        | 0.296        | 0.994        | -1.05        | -1.91       | -0.016(.292)       | -0.038(.270)        |
| None-rhFusiform                      | 28        | 0         | -37        | 0.836        | 0.994        | -0.21        | -2.42       | -0.059(.539)       | -0.067(.502)        |
| None-rhInferiorTemporal              | 37        | 8         | -38        | 0.41         | 0.994        | -0.82        | -2.12       | -0.063(.284)       | -0.080(.269)        |
| None-rhInferiorTemporal              | 54        | -10       | -37        | 0.106        | 0.906        | -1.62        | -1.11       | 0.025(.507)        | -0.039(.481)        |
| None-rhInferiorTemporal              | 56        | -27       | -19        | 0.852        | 0.994        | 0.19         | -2.42       | 0.076(.727)        | 0.087(.722)         |
| None-rhFusiform                      | 31        | 2         | -46        | 0.96         | 0.994        | -0.05        | -2.44       | -0.052(.523)       | -0.054(.473)        |
| None-rhFusiform                      | 40        | -12       | -30        | 0.632        | 0.994        | -0.48        | -2.32       | -0.052(.320)       | -0.064(.297)        |
| None-rhFusiform                      | 32        | -9        | -36        | 0.301        | 0.994        | 1.04         | -1.9        | -0.053(.388)       | -0.021(.394)        |
| None-rhInferiorTemporal              | 43        | -24       | -21        | 0.247        | 0.994        | 1.16         | -1.78       | -0.101(.390)       | -0.066(.378)        |
| None-rhParaHippocampal               | 20        | -11       | -25        | 0.072        | 0.906        | -1.8         | -0.84       | -0.023(.281)       | -0.062(.269)        |
| None-rhParaHippocampal               | 30        | -19       | -19        | 0.9          | 0.994        | -0.13        | -2.44       | -0.059(.280)       | -0.061(.259)        |
| RetrosplenialTemporal-lhCalcarine    | -14       | -58       | 18         | 0.083        | 0.906        | -1.73        | -1          | -0.094(.231)       | -0.124(.225)        |
| RetrosplenialTemporal-lhLingual      | -9        | -50       | 4          | 0.778        | 0.994        | 0.28         | -2.43       | -0.136(.245)       | -0.131(.256)        |
| RetrosplenialTemporal-lhFusiform     | -34       | -33       | -15        | 0.921        | 0.994        | -0.1         | -2.45       | -0.114(.213)       | -0.115(.190)        |
| RetrosplenialTemporal-lhFusiform     | -22       | -37       | -15        | 0.124        | 0.906        | -1.54        | -1.3        | -0.084(.232)       | -0.108(.206)        |
| RetrosplenialTemporal-rhCalcarine    | 14        | -54       | 11         | 0.346        | 0.994        | -0.94        | -2.03       | -0.074(.228)       | -0.090(.223)        |
| RetrosplenialTemporal-rhFusiform     | 35        | -36       | -12        | 0.146        | 0.906        | -1.46        | -1.43       | -0.088(.237)       | -0.113(.221)        |
| RetrosplenialTemporal-rhFusiform     | 35        | -24       | -20        | 0.677        | 0.994        | 0.42         | -2.37       | -0.087(.237)       | -0.080(.226)        |

|                                  |     |     |     |       |       |       |       |              |              |
|----------------------------------|-----|-----|-----|-------|-------|-------|-------|--------------|--------------|
| RetrosplenialTemporal-rhFusiform | 24  | -36 | -13 | 0.278 | 0.994 | -1.08 | -1.87 | -0.081(.249) | -0.100(.219) |
| Saliencel-hAnteriorCingulum      | -10 | 34  | 22  | 0.48  | 0.994 | -0.71 | -2.22 | 0.089(.234)  | 0.077(.225)  |
| Saliencel-hInsula                | -32 | 17  | -8  | 0.989 | 0.994 | -0.01 | -2.47 | 0.112(.276)  | 0.111(.271)  |
| Saliencel-rhAnteriorCingulum     | 8   | 35  | 23  | 0.45  | 0.994 | 0.76  | -2.18 | 0.073(.258)  | 0.086(.234)  |
| Saliencel-rhInsula               | 31  | 23  | -5  | 0.448 | 0.994 | -0.76 | -2.19 | 0.182(.298)  | 0.164(.301)  |
| SMhand-lhSuperiorParietal        | -19 | -49 | 65  | 0.929 | 0.994 | -0.09 | -2.44 | -0.056(.163) | -0.057(.156) |
| SMhand-lhPrecuneus               | -11 | -48 | 60  | 0.718 | 0.994 | -0.36 | -2.38 | -0.056(.207) | -0.062(.201) |
| SMhand-lhLobuleParacentral       | -16 | -33 | 66  | 0.178 | 0.954 | -1.35 | -1.56 | -0.092(.226) | -0.115(.225) |
| SMhand-lhLobuleParacentral       | -11 | -29 | 70  | 0.862 | 0.994 | -0.17 | -2.43 | -0.053(.162) | -0.055(.152) |
| SMhand-lhLobuleParacentral       | -7  | -20 | 74  | 0.317 | 0.994 | -1    | -1.96 | -0.025(.203) | -0.041(.211) |
| SMhand-lhPrecuneus               | -11 | -41 | 65  | 0.893 | 0.994 | 0.13  | -2.45 | -0.049(.196) | -0.047(.178) |
| SMhand-lhLobuleParacentral       | -5  | -28 | 60  | 0.145 | 0.906 | -1.46 | -1.41 | -0.038(.190) | -0.056(.164) |
| SMhand-lhMiddleCingulum          | -5  | -16 | 49  | 0.581 | 0.994 | -0.55 | -2.32 | -0.073(.207) | -0.081(.192) |
| SMhand-lhPostcentral             | -36 | -30 | 54  | 0.166 | 0.954 | -1.38 | -1.53 | -0.062(.238) | -0.088(.247) |
| SMhand-lhPrecentral              | -37 | -23 | 62  | 0.714 | 0.994 | -0.37 | -2.38 | -0.046(.179) | -0.051(.166) |
| SMhand-lhPrecentral              | -20 | -25 | 64  | 0.962 | 0.994 | -0.05 | -2.45 | -0.053(.180) | -0.053(.163) |
| SMhand-lhPrecentral              | -23 | -14 | 64  | 0.505 | 0.994 | 0.67  | -2.23 | -0.039(.157) | -0.031(.151) |
| SMhand-lhLobuleParacentral       | -17 | -9  | 68  | 0.568 | 0.994 | 0.57  | -2.29 | -0.029(.142) | -0.022(.138) |
| SMhand-lhSuperiorParietal        | -29 | -45 | 62  | 0.514 | 0.994 | 0.65  | -2.24 | -0.075(.178) | -0.066(.175) |
| SMhand-lhInferiorParietal        | -54 | -21 | 41  | 0.849 | 0.994 | 0.19  | -2.44 | -0.064(.204) | -0.061(.197) |
| SMhand-lhPostcentral             | -35 | -35 | 42  | 0.754 | 0.994 | -0.31 | -2.43 | 0.004(.208)  | -0.001(.209) |
| SMhand-lhPostcentral             | -28 | -37 | 61  | 0.818 | 0.994 | -0.23 | -2.43 | -0.046(.171) | -0.049(.151) |
| SMhand-lhPostcentral             | -47 | -31 | 55  | 0.803 | 0.994 | -0.25 | -2.42 | -0.033(.195) | -0.037(.195) |
| SMhand-rhSuperiorParietal        | 21  | -48 | 66  | 0.318 | 0.994 | 1     | -1.96 | -0.068(.170) | -0.055(.161) |
| SMhand-rhPostcentral             | 16  | -33 | 68  | 0.299 | 0.994 | -1.04 | -1.93 | -0.095(.260) | -0.115(.241) |
| SMhand-rhLobuleParacentral       | 5   | -27 | 65  | 0.178 | 0.954 | -1.35 | -1.56 | -0.037(.189) | -0.055(.172) |
| SMhand-rhPostcentral             | 12  | -41 | 67  | 0.697 | 0.994 | -0.39 | -2.36 | -0.044(.181) | -0.050(.177) |
| SMhand-rhSupplementaryMotor      | 5   | -17 | 52  | 0.434 | 0.994 | -0.78 | -2.15 | -0.065(.215) | -0.078(.206) |
| SMhand-rhMiddleCingulum          | 7   | -8  | 51  | 0.637 | 0.994 | -0.47 | -2.34 | -0.074(.201) | -0.081(.186) |
| SMhand-rhPrecentral              | 38  | -22 | 60  | 0.973 | 0.994 | 0.03  | -2.44 | -0.058(.159) | -0.057(.152) |
| SMhand-rhPrecentral              | 20  | -25 | 65  | 0.606 | 0.994 | -0.52 | -2.32 | -0.050(.169) | -0.056(.160) |
| SMhand-rhPrecentral              | 12  | -28 | 70  | 0.747 | 0.994 | -0.32 | -2.39 | -0.045(.161) | -0.049(.160) |
| SMhand-rhPrecentral              | 29  | -14 | 64  | 0.649 | 0.994 | -0.46 | -2.35 | -0.041(.179) | -0.048(.182) |
| SMhand-rhPrecentral              | 17  | -17 | 71  | 0.565 | 0.994 | 0.57  | -2.27 | -0.063(.165) | -0.056(.151) |
| SMhand-rhSuperiorFrontal         | 21  | -6  | 65  | 0.351 | 0.994 | -0.93 | -2.04 | 0.021(.160)  | 0.010(.160)  |
| SMhand-rhPostcentral             | 30  | -42 | 60  | 0.656 | 0.994 | 0.45  | -2.36 | -0.087(.195) | -0.080(.191) |
| SMhand-rhInferiorParietal        | 34  | -41 | 52  | 0.016 | 0.818 | 2.41  | 0.39  | -0.047(.237) | -0.001(.246) |
| SMhand-rhSupraMarginal           | 40  | -32 | 40  | 0.092 | 0.906 | 1.69  | -1.07 | -0.013(.221) | 0.015(.211)  |
| SMhand-rhPostcentral             | 28  | -35 | 63  | 0.987 | 0.994 | 0.02  | -2.45 | -0.046(.160) | -0.046(.150) |
| SMhand-rhPostcentral             | 39  | -35 | 58  | 0.919 | 0.994 | -0.1  | -2.45 | -0.043(.194) | -0.044(.182) |
| SMhand-rhPostcentral             | 37  | -26 | 51  | 0.283 | 0.994 | -1.07 | -1.89 | -0.085(.238) | -0.104(.227) |
| SMhand-rhPostcentral             | 49  | -26 | 52  | 0.845 | 0.994 | -0.19 | -2.43 | -0.050(.199) | -0.053(.192) |
| SMhand-rhSupraMarginal           | 53  | -23 | 39  | 0.627 | 0.994 | 0.49  | -2.35 | -0.054(.210) | -0.046(.197) |
| SMmouth-lhPostcentral            | -52 | -8  | 38  | 0.586 | 0.994 | -0.54 | -2.31 | -0.056(.181) | -0.063(.174) |
| SMmouth-lhPostcentral            | -42 | -12 | 50  | 0.629 | 0.994 | 0.48  | -2.34 | -0.041(.183) | -0.035(.174) |
| SMmouth-lhPostcentral            | -52 | -12 | 30  | 0.039 | 0.837 | -2.07 | -0.38 | -0.063(.254) | -0.103(.254) |
| SMmouth-lhPostcentral            | -46 | -18 | 53  | 0.499 | 0.994 | -0.68 | -2.24 | -0.075(.259) | -0.088(.250) |
| SMmouth-rhPostcentral            | 50  | -7  | 36  | 0.527 | 0.994 | -0.63 | -2.26 | -0.061(.201) | -0.070(.184) |
| SMmouth-rhPrecentral             | 42  | -11 | 47  | 0.969 | 0.994 | -0.04 | -2.45 | -0.048(.192) | -0.048(.169) |

|                                         |     |     |     |       |       |       |       |              |              |
|-----------------------------------------|-----|-----|-----|-------|-------|-------|-------|--------------|--------------|
| SMmouth-rhPostcentral                   | 54  | -8  | 26  | 0.037 | 0.837 | -2.09 | -0.34 | -0.069(.259) | -0.108(.247) |
| SMmouth-rhPrecentral                    | 48  | -15 | 49  | 0.807 | 0.994 | 0.24  | -2.41 | -0.119(.229) | -0.115(.231) |
| Subcortical-lhCerebellum                | NA  | NA  | NA  | 0.93  | 0.994 | -0.09 | -2.5  | 0.070(.272)  | 0.068(.258)  |
| Subcortical-lhThalamus                  | NA  | NA  | NA  | 0.089 | 0.906 | 1.7   | -1.08 | 0.013(.137)  | 0.029(.130)  |
| Subcortical-lhCaudate                   | NA  | NA  | NA  | 0.781 | 0.994 | -0.28 | -2.47 | 0.039(.224)  | 0.035(.198)  |
| Subcortical-lhPutamen                   | NA  | NA  | NA  | 0.835 | 0.994 | -0.21 | -2.48 | -0.017(.176) | -0.019(.165) |
| Subcortical-lhPallidum                  | NA  | NA  | NA  | 0.715 | 0.994 | 0.37  | -2.42 | 0.004(.141)  | 0.008(.133)  |
| Subcortical-brainStem                   | NA  | NA  | NA  | 0.534 | 0.994 | 0.62  | -2.29 | 0.028(.166)  | 0.035(.159)  |
| Subcortical-lhHippocampus               | NA  | NA  | NA  | 0.397 | 0.994 | -0.85 | -2.14 | -0.064(.155) | -0.074(.153) |
| Subcortical-lhAmygdala                  | NA  | NA  | NA  | 0.116 | 0.906 | -1.57 | -1.27 | -0.049(.194) | -0.071(.189) |
| Subcortical-lhAccumbens                 | NA  | NA  | NA  | 0.149 | 0.906 | -1.44 | -1.47 | -0.018(.219) | -0.040(.211) |
| Subcortical-lhVentraldc                 | NA  | NA  | NA  | 0.763 | 0.994 | -0.3  | -2.44 | 0.036(.170)  | 0.032(.168)  |
| Subcortical-rhCerebellum                | NA  | NA  | NA  | 0.438 | 0.994 | 0.78  | -2.21 | 0.043(.264)  | 0.058(.254)  |
| Subcortical-rhThalamus                  | NA  | NA  | NA  | 0.744 | 0.994 | 0.33  | -2.44 | 0.036(.159)  | 0.040(.143)  |
| Subcortical-rhCaudate                   | NA  | NA  | NA  | 0.765 | 0.994 | 0.3   | -2.46 | 0.030(.217)  | 0.035(.199)  |
| Subcortical-rhPutamen                   | NA  | NA  | NA  | 0.826 | 0.994 | 0.22  | -2.48 | -0.021(.181) | -0.019(.166) |
| Subcortical-rhPallidum                  | NA  | NA  | NA  | 0.24  | 0.994 | 1.18  | -1.81 | 0.015(.145)  | 0.027(.136)  |
| Subcortical-rhHippocampus               | NA  | NA  | NA  | 0.167 | 0.954 | -1.38 | -1.55 | -0.050(.163) | -0.066(.153) |
| Subcortical-rhAmygdala                  | NA  | NA  | NA  | 0.148 | 0.906 | -1.45 | -1.47 | -0.042(.206) | -0.063(.195) |
| Subcortical-rhAccumbens                 | NA  | NA  | NA  | 0.551 | 0.994 | -0.6  | -2.31 | -0.017(.190) | -0.025(.189) |
| Subcortical-rhVentraldc                 | NA  | NA  | NA  | 0.531 | 0.994 | 0.63  | -2.31 | 0.032(.175)  | 0.039(.163)  |
| VentralAttn-lhSupplementaryMotor        | -4  | 12  | 65  | 0.753 | 0.994 | -0.32 | -2.42 | 0.075(.165)  | 0.071(.168)  |
| VentralAttn-lhMiddleTemporal            | -45 | -54 | 15  | 0.927 | 0.994 | -0.09 | -2.47 | 0.042(.229)  | 0.041(.233)  |
| VentralAttn-lhMiddleTemporal            | -52 | -56 | 11  | 0.749 | 0.994 | 0.32  | -2.43 | 0.002(.221)  | 0.007(.225)  |
| VentralAttn-lhMiddleTemporal            | -48 | -40 | 2   | 0.366 | 0.994 | -0.9  | -2.07 | -0.006(.175) | -0.018(.174) |
| VentralAttn-lhTriangularInferiorFrontal | -50 | 21  | 11  | 0.529 | 0.994 | -0.63 | -2.27 | 0.004(.251)  | -0.007(.238) |
| VentralAttn-lhOrbitalInferiorFrontal    | -47 | 39  | -9  | 0.498 | 0.994 | -0.68 | -2.23 | -0.004(.387) | -0.022(.349) |
| VentralAttn-lhInsula                    | -29 | 20  | -14 | 0.025 | 0.837 | -2.25 | 0.01  | -0.025(.206) | -0.060(.206) |
| VentralAttn-lhOrbitalInferiorFrontal    | -44 | 33  | -7  | 0.454 | 0.994 | -0.75 | -2.18 | -0.060(.294) | -0.076(.269) |
| VentralAttn-lhTriangularInferiorFrontal | -45 | 29  | 1   | 0.712 | 0.994 | -0.37 | -2.39 | -0.093(.265) | -0.100(.256) |
| VentralAttn-lhPrecentral                | -39 | 5   | 48  | 0.639 | 0.994 | 0.47  | -2.35 | 0.105(.232)  | 0.113(.230)  |
| VentralAttn-lhMiddleTemporal            | -59 | -18 | -3  | 0.578 | 0.994 | -0.56 | -2.31 | -0.049(.203) | -0.058(.211) |
| VentralAttn-rhMiddleTemporal            | 58  | -45 | 9   | 0.763 | 0.994 | -0.3  | -2.42 | -0.007(.196) | -0.012(.202) |
| VentralAttn-rhMiddleTemporal            | 61  | -39 | 2   | 0.66  | 0.994 | -0.44 | -2.36 | 0.008(.226)  | 0.000(.226)  |
| VentralAttn-rhSuperiorTemporal          | 57  | -17 | -3  | 0.992 | 0.995 | 0.01  | -2.45 | -0.053(.191) | -0.053(.192) |
| VentralAttn-rhSuperiorTemporal          | 47  | -40 | 13  | 0.559 | 0.994 | -0.58 | -2.3  | -0.010(.214) | -0.018(.197) |
| VentralAttn-rhMiddleTemporal            | 46  | -37 | 3   | 0.671 | 0.994 | -0.43 | -2.36 | -0.022(.186) | -0.028(.182) |

|                                         |     |     |     |       |       |       |       |              |              |
|-----------------------------------------|-----|-----|-----|-------|-------|-------|-------|--------------|--------------|
| VentralAttn-rhSuperiorTemporal          | 48  | -26 | 0   | 0.123 | 0.906 | -1.54 | -1.3  | -0.018(.192) | -0.039(.181) |
| VentralAttn-rhTriangularInferiorFrontal | 52  | 24  | 10  | 0.941 | 0.994 | -0.07 | -2.45 | -0.005(.267) | -0.006(.272) |
| VentralAttn-rhOrbitalInferiorFrontal    | 48  | 38  | -9  | 0.58  | 0.994 | -0.55 | -2.3  | -0.012(.342) | -0.026(.330) |
| VentralAttn-rhOrbitalInferiorFrontal    | 45  | 31  | -6  | 0.096 | 0.906 | -1.67 | -1.11 | -0.045(.256) | -0.076(.240) |
| VentralAttn-rhInsula                    | 27  | 20  | -15 | 0.474 | 0.994 | -0.72 | -2.22 | -0.009(.228) | -0.021(.222) |
| VentralAttn-rhSuperiorTemporal          | 57  | -6  | -8  | 0.291 | 0.994 | -1.06 | -1.92 | -0.050(.187) | -0.065(.190) |
| VentralAttn-rhMiddleTemporal            | 47  | -22 | -8  | 0.785 | 0.994 | -0.27 | -2.42 | -0.016(.246) | -0.021(.232) |
| Visual-lhSuperiorOccipital              | -18 | -86 | 22  | 0.235 | 0.994 | -1.19 | -1.77 | 0.004(.209)  | -0.016(.212) |
| Visual-lhLingual                        | -17 | -60 | -5  | 0.338 | 0.994 | 0.96  | -2.02 | 0.009(.259)  | 0.027(.239)  |
| Visual-lhCalcarine                      | -11 | -83 | 4   | 0.785 | 0.994 | 0.27  | -2.43 | 0.098(.318)  | 0.105(.320)  |
| Visual-lhLingual                        | -22 | -58 | 2   | 0.359 | 0.994 | 0.92  | -2.05 | 0.033(.334)  | 0.057(.340)  |
| Visual-lhLingual                        | -10 | -58 | 3   | 0.895 | 0.994 | 0.13  | -2.45 | -0.077(.451) | -0.072(.487) |
| Visual-lhLingual                        | -17 | -46 | -4  | 0.684 | 0.994 | 0.41  | -2.38 | -0.010(.300) | -0.001(.291) |
| Visual-lhSuperiorOccipital              | -14 | -77 | 27  | 0.534 | 0.994 | -0.62 | -2.27 | -0.019(.189) | -0.028(.201) |
| Visual-lhMiddleOccipital                | -31 | -84 | 9   | 0.256 | 0.994 | -1.14 | -1.83 | -0.027(.256) | -0.047(.233) |
| Visual-lhMiddleOccipital                | -34 | -87 | 0   | 0.27  | 0.994 | -1.1  | -1.85 | -0.029(.304) | -0.052(.259) |
| Visual-lhMiddleOccipital                | -43 | -68 | 10  | 0.423 | 0.994 | -0.8  | -2.16 | -0.029(.190) | -0.040(.183) |
| Visual-lhFusiform                       | -29 | -59 | -9  | 0.065 | 0.906 | -1.85 | -0.8  | -0.009(.241) | -0.041(.219) |
| Visual-lhFusiform                       | -34 | -64 | -16 | 0.016 | 0.818 | -2.42 | 0.4   | 0.055(.331)  | 0.001(.289)  |
| Visual-lhFusiform                       | -34 | -44 | -22 | 0.069 | 0.906 | -1.82 | -0.83 | 0.005(.268)  | -0.030(.250) |
| Visual-lhCuneus                         | -5  | -88 | 19  | 0.853 | 0.994 | 0.19  | -2.45 | 0.021(.234)  | 0.024(.229)  |
| Visual-lhLingual                        | -9  | -78 | -4  | 0.983 | 0.994 | -0.02 | -2.46 | 0.092(.315)  | 0.092(.302)  |
| Visual-lhInferiorOccipital              | -41 | -72 | -6  | 0.119 | 0.906 | -1.56 | -1.27 | -0.045(.244) | -0.073(.230) |
| Visual-lhInferiorOccipital              | -25 | -97 | -8  | 0.219 | 0.994 | -1.23 | -1.69 | -0.005(.431) | -0.046(.431) |
| Visual-lhLingual                        | -23 | -82 | -12 | 0.05  | 0.906 | -1.96 | -0.58 | 0.102(.302)  | 0.060(.279)  |
| Visual-rhSuperiorOccipital              | 22  | -85 | 24  | 0.815 | 0.994 | -0.23 | -2.43 | -0.033(.226) | -0.037(.226) |
| Visual-rhFusiform                       | 22  | -46 | -10 | 0.462 | 0.994 | -0.74 | -2.19 | -0.032(.228) | -0.044(.220) |
| Visual-rhCalcarine                      | 16  | -74 | 9   | 0.272 | 0.994 | 1.1   | -1.88 | 0.038(.300)  | 0.064(.314)  |
| Visual-rhLingual                        | 20  | -45 | -4  | 0.732 | 0.994 | 0.34  | -2.41 | -0.024(.312) | -0.016(.293) |
| Visual-rhLingual                        | 16  | -60 | -5  | 0.186 | 0.963 | 1.32  | -1.6  | -0.002(.248) | 0.023(.249)  |
| Visual-rhInferiorParietal               | 27  | -55 | 54  | 0.081 | 0.906 | 1.75  | -0.96 | 0.014(.225)  | 0.044(.223)  |
| Visual-rhCuneus                         | 18  | -78 | 34  | 0.501 | 0.994 | -0.67 | -2.23 | -0.023(.206) | -0.034(.203) |
| Visual-rhCuneus                         | 8   | -86 | 32  | 0.671 | 0.994 | 0.43  | -2.37 | -0.026(.252) | -0.018(.264) |
| Visual-rhMiddleOccipital                | 35  | -77 | 21  | 0.235 | 0.994 | -1.19 | -1.77 | -0.033(.233) | -0.054(.233) |
| Visual-rhMiddleOccipital                | 32  | -86 | 2   | 0.821 | 0.994 | 0.23  | -2.41 | -0.086(.270) | -0.082(.278) |
| Visual-rhMiddleTemporal                 | 44  | -67 | 2   | 0.204 | 0.994 | -1.27 | -1.67 | -0.059(.210) | -0.077(.189) |
| Visual-rhInferiorTemporal               | 47  | -52 | -12 | 0.839 | 0.994 | 0.2   | -2.44 | -0.076(.219) | -0.073(.194) |
| Visual-rhMiddleTemporal                 | 49  | -54 | 9   | 0.278 | 0.994 | 1.09  | -1.89 | -0.029(.200) | -0.013(.189) |
| Visual-rhFusiform                       | 31  | -46 | -6  | 0.083 | 0.906 | -1.73 | -1    | -0.077(.276) | -0.113(.272) |
| Visual-rhFusiform                       | 27  | -69 | -7  | 0.973 | 0.994 | 0.03  | -2.46 | -0.002(.268) | -0.001(.239) |
| Visual-rhFusiform                       | 35  | -44 | -20 | 0.076 | 0.906 | -1.77 | -0.92 | -0.012(.263) | -0.047(.259) |
| Visual-rhCuneus                         | 14  | -92 | 15  | 0.334 | 0.994 | 0.97  | -1.99 | -0.016(.259) | 0.003(.253)  |
| Visual-rhLingual                        | 10  | -74 | -2  | 0.284 | 0.994 | 1.07  | -1.9  | 0.040(.290)  | 0.063(.289)  |
| Visual-rhLingual                        | 20  | -87 | -7  | 0.529 | 0.994 | -0.63 | -2.27 | 0.013(.334)  | -0.003(.328) |
| Visual-rhCuneus                         | 5   | -80 | 23  | 0.279 | 0.994 | 1.08  | -1.88 | 0.020(.247)  | 0.041(.257)  |

|                 |    |     |    |       |       |      |       |             |             |
|-----------------|----|-----|----|-------|-------|------|-------|-------------|-------------|
| Visual-rhCuneus | 15 | -70 | 23 | 0.589 | 0.994 | 0.54 | -2.32 | 0.005(.221) | 0.014(.238) |
|-----------------|----|-----|----|-------|-------|------|-------|-------------|-------------|

\* = qFDR < .05. Bold = qFDR < .05 or  $\ln(\text{BF}_{10}) > 1.1$ . Note that x, y and z values here refer to the Montreal Neurological Institute (MNI) coordinates at the centroid of each cortical-surface region-of-interest (ROI) of a standard MNI brain. The label for each cortical-surface ROI is based on the Automated Anatomical Labeling (AAL) algorithm<sup>2</sup> via the mni2aal R package (<https://github.com/yunshiuai/label4MRI>). The label for each subcortical-volumetric ROI is based on Freesurfer' segmentation algorithm<sup>3</sup>, applied on each participant's individual brain space. Given that individual brain space was used for subcortical ROIs, their x, y and z coordinates are not given here. \* = qFDR < .05. Bold = qFDR < .05 or  $\ln(\text{BF}_{10}) > 1.1$ . The value of  $\ln(\text{BF}_{10}) > 1.1$  and  $< -1.2$  are interpreted as substantial evidence for the alternative (of there being a difference), and null hypotheses (of there being *no* difference), respectively.

**eTable 12.** Group differences between children with vs. without anxiety during working-memory [Two-Back > Zero-Back] in the N-Back task-fMRI activation

| Name: Network-ROI             | x   | y   | z  | <i>p</i> | <i>q</i> <sub>FDR</sub> | <i>t</i> | ln(BF <sub>10</sub> ) | With Anxiety<br><i>M</i> ( <i>SD</i> ) | Without Anxiety<br><i>M</i> ( <i>SD</i> ) |
|-------------------------------|-----|-----|----|----------|-------------------------|----------|-----------------------|----------------------------------------|-------------------------------------------|
| Auditory-lhHeschl             | -32 | -29 | 16 | 0.65     | 0.982                   | 0.45     | -1.92                 | -0.054(.199)                           | -0.066(.215)                              |
| Auditory-lhSupraMarginal      | -46 | -41 | 26 | 0.579    | 0.982                   | 0.55     | -1.87                 | -0.088(.276)                           | -0.071(.252)                              |
| Auditory-lhOpercularRolandic  | -36 | -34 | 20 | 0.432    | 0.982                   | 0.79     | -1.73                 | -0.107(.225)                           | -0.084(.246)                              |
| Auditory-lhSuperiorTemporal   | -53 | -21 | 5  | 0.309    | 0.982                   | 1.02     | -1.51                 | -0.081(.177)                           | -0.057(.191)                              |
| Auditory-lhSuperiorTemporal   | -60 | -38 | 16 | 0.492    | 0.982                   | 0.69     | -1.8                  | -0.032(.180)                           | -0.048(.197)                              |
| Auditory-lhSuperiorTemporal   | -59 | -30 | 11 | 0.282    | 0.982                   | 1.08     | -1.48                 | -0.090(.176)                           | -0.067(.182)                              |
| Auditory-lhSuperiorTemporal   | -41 | -38 | 14 | 0.16     | 0.982                   | 1.41     | -1.09                 | -0.102(.226)                           | -0.065(.219)                              |
| Auditory-lhInsula             | -34 | -22 | 10 | 0.55     | 0.982                   | -0.6     | -1.86                 | -0.037(.202)                           | -0.051(.190)                              |
| Auditory-lhInsula             | -37 | -14 | 19 | 0.894    | 0.991                   | 0.13     | -2.03                 | -0.114(.246)                           | -0.118(.237)                              |
| Auditory-lhOpercularRolandic  | -52 | -14 | 15 | 0.405    | 0.982                   | 0.83     | -1.7                  | -0.154(.255)                           | -0.128(.262)                              |
| Auditory-lhSupraMarginal      | -51 | -22 | 19 | 0.151    | 0.982                   | 1.44     | -1.06                 | -0.146(.211)                           | -0.108(.221)                              |
| Auditory-lhSuperiorTemporal   | -54 | -1  | -1 | 0.117    | 0.982                   | 1.57     | -0.82                 | -0.024(.165)                           | -0.057(.170)                              |
| Auditory-rhInsula             | 34  | -22 | 13 | 0.666    | 0.982                   | 0.43     | -1.93                 | -0.075(.192)                           | -0.064(.208)                              |
| Auditory-rhOpercularRolandic  | 36  | -31 | 19 | 0.647    | 0.982                   | 0.46     | -1.95                 | -0.075(.206)                           | -0.087(.229)                              |
| Auditory-rhSuperiorTemporal   | 54  | -16 | 5  | 0.609    | 0.982                   | 0.51     | -1.9                  | -0.062(.188)                           | -0.050(.187)                              |
| Auditory-rhSuperiorTemporal   | 59  | -39 | 15 | 0.343    | 0.982                   | 0.95     | -1.59                 | -0.046(.190)                           | -0.024(.183)                              |
| Auditory-rhSuperiorTemporal   | 62  | -24 | 1  | 0.299    | 0.982                   | 1.04     | -1.5                  | -0.082(.230)                           | -0.054(.223)                              |
| Auditory-rhSuperiorTemporal   | 60  | -25 | 10 | 0.535    | 0.982                   | 0.62     | -1.84                 | -0.081(.170)                           | -0.067(.187)                              |
| Auditory-rhInsula             | 38  | -12 | 20 | 0.072    | 0.982                   | 1.8      | -0.49                 | -0.190(.244)                           | -0.137(.248)                              |
| Auditory-rhInsula             | 37  | -10 | 12 | 0.939    | 0.991                   | 0.08     | -2.04                 | -0.076(.240)                           | -0.074(.228)                              |
| Auditory-rhOpercularRolandic  | 61  | -2  | 11 | 0.324    | 0.982                   | 0.99     | -1.56                 | -0.157(.228)                           | -0.126(.260)                              |
| Auditory-rhOpercularRolandic  | 54  | -14 | 17 | 0.227    | 0.982                   | 1.21     | -1.35                 | -0.165(.242)                           | -0.131(.242)                              |
| Auditory-rhSuperiorTemporal   | 40  | -22 | 3  | 0.446    | 0.982                   | 0.76     | -1.76                 | -0.143(.415)                           | -0.111(.348)                              |
| Auditory-rhSuperiorTemporal   | 56  | 2   | -2 | 0.789    | 0.982                   | 0.27     | -1.99                 | -0.066(.158)                           | -0.061(.158)                              |
| CinguloOperc-lhMiddleCingulum | -17 | -36 | 43 | 0.685    | 0.982                   | 0.41     | -1.95                 | -0.056(.150)                           | -0.048(.167)                              |

|                                         |     |     |     |       |       |      |       |              |              |
|-----------------------------------------|-----|-----|-----|-------|-------|------|-------|--------------|--------------|
| CinguloOperc-lhMiddleCingulum           | -9  | 0   | 43  | 0.216 | 0.982 | 1.24 | -1.3  | -0.033(.164) | -0.010(.159) |
| CinguloOperc-lhMiddleCingulum           | -8  | 15  | 34  | 0.36  | 0.982 | 0.92 | -1.65 | 0.020(.176)  | 0.039(.184)  |
| CinguloOperc-lhAnteriorCingulum         | -9  | 25  | 28  | 0.343 | 0.982 | 0.95 | -1.61 | 0.072(.223)  | 0.100(.257)  |
| CinguloOperc-lhSupplementaryMotor       | -8  | -9  | 63  | 0.878 | 0.991 | 0.15 | -2.01 | -0.025(.146) | -0.027(.151) |
| CinguloOperc-lhPrecentral               | -42 | -4  | 47  | 0.965 | 0.991 | 0.04 | -2.02 | 0.069(.223)  | 0.068(.225)  |
| CinguloOperc-lhSupraMarginal            | -58 | -41 | 36  | 0.886 | 0.991 | 0.14 | -2.02 | 0.028(.212)  | 0.025(.209)  |
| CinguloOperc-lhSuperiorTemporal         | -39 | -16 | -5  | 0.606 | 0.982 | 0.52 | -1.89 | -0.077(.205) | -0.065(.185) |
| CinguloOperc-lhInsula                   | -39 | -2  | -12 | 0.632 | 0.982 | 0.48 | -1.91 | -0.076(.173) | -0.066(.172) |
| CinguloOperc-lhInsula                   | -38 | 3   | 12  | 0.081 | 0.982 | 1.75 | -0.59 | -0.072(.187) | -0.035(.179) |
| CinguloOperc-lhInsula                   | -37 | 1   | 6   | 0.071 | 0.982 | 1.8  | -0.47 | -0.089(.168) | -0.050(.178) |
| CinguloOperc-lhInsula                   | -37 | 9   | -1  | 0.751 | 0.982 | 0.32 | -1.97 | -0.006(.210) | 0.002(.194)  |
| CinguloOperc-lhInsula                   | -29 | 24  | 8   | 0.312 | 0.982 | 1.01 | -1.55 | 0.083(.239)  | 0.110(.225)  |
| CinguloOperc-lhOpercularRolandic        | -60 | -4  | 9   | 0.2   | 0.982 | 1.28 | -1.24 | -0.159(.275) | -0.118(.263) |
| CinguloOperc-lhSuperiorTemporal         | -55 | -32 | 23  | 0.397 | 0.982 | 0.85 | -1.7  | -0.140(.214) | -0.119(.212) |
| CinguloOperc-lhSupraMarginal            | -59 | -24 | 31  | 0.037 | 0.982 | 2.08 | 0.03  | -0.119(.208) | -0.070(.198) |
| CinguloOperc-lhOpercularRolandic        | -52 | -1  | 5   | 0.32  | 0.982 | 0.99 | -1.57 | -0.115(.224) | -0.091(.208) |
| CinguloOperc-lhOpercularInferiorFrontal | -49 | 8   | 11  | 0.229 | 0.982 | 1.2  | -1.35 | 0.008(.194)  | 0.038(.209)  |
| CinguloOperc-lhMiddleFrontal            | -27 | 47  | 21  | 0.694 | 0.982 | 0.39 | -1.95 | 0.076(.256)  | 0.064(.271)  |
| CinguloOperc-lhMiddleFrontal            | -29 | 38  | 28  | 0.571 | 0.982 | 0.57 | -1.89 | 0.040(.201)  | 0.025(.232)  |
| CinguloOperc-rhMiddleCingulum           | 16  | -33 | 43  | 0.066 | 0.982 | 1.84 | -0.41 | -0.059(.138) | -0.024(.160) |
| CinguloOperc-rhSupplementaryMotor       | 7   | 5   | 56  | 0.533 | 0.982 | 0.62 | -1.82 | 0.033(.202)  | 0.049(.210)  |
| CinguloOperc-rhMiddleCingulum           | 9   | 4   | 40  | 0.418 | 0.982 | 0.81 | -1.72 | -0.029(.148) | -0.013(.164) |
| CinguloOperc-rhMiddleCingulum           | 9   | 11  | 46  | 0.3   | 0.982 | 1.04 | -1.52 | 0.092(.252)  | 0.120(.230)  |
| CinguloOperc-rhMiddleCingulum           | 6   | 22  | 32  | 0.783 | 0.982 | 0.28 | -2.01 | 0.078(.198)  | 0.084(.200)  |
| CinguloOperc-rhSupplementaryMotor       | 16  | 1   | 68  | 0.17  | 0.982 | 1.37 | -1.13 | 0.026(.142)  | 0.054(.173)  |
| CinguloOperc-rhSupplementaryMotor       | 8   | -6  | 64  | 0.205 | 0.982 | 1.27 | -1.26 | -0.004(.150) | -0.027(.152) |
| CinguloOperc-rhPrecentral               | 42  | -2  | 47  | 0.775 | 0.982 | 0.29 | -1.98 | 0.066(.206)  | 0.059(.213)  |
| CinguloOperc-rhSupraMarginal            | 58  | -40 | 35  | 0.783 | 0.982 | 0.28 | -1.99 | 0.119(.225)  | 0.126(.227)  |

|                                  |     |     |     |       |       |      |       |              |              |
|----------------------------------|-----|-----|-----|-------|-------|------|-------|--------------|--------------|
| CinguloOperc-rhSupraMarginal     | 55  | -27 | 30  | 0.087 | 0.982 | 1.71 | -0.63 | -0.111(.157) | -0.073(.182) |
| CinguloOperc-rhInsula            | 39  | -14 | -5  | 0.369 | 0.982 | 0.9  | -1.64 | -0.085(.183) | -0.066(.176) |
| CinguloOperc-rhInsula            | 40  | 1   | -13 | 0.018 | 0.982 | 2.36 | 0.62  | -0.125(.183) | -0.070(.195) |
| CinguloOperc-rhInsula            | 37  | 5   | 13  | 0.136 | 0.982 | 1.49 | -0.97 | -0.116(.192) | -0.081(.196) |
| CinguloOperc-rhInsula            | 40  | 10  | -2  | 0.185 | 0.982 | 1.32 | -1.19 | -0.010(.201) | 0.020(.181)  |
| CinguloOperc-rhInsula            | 36  | 6   | 6   | 0.493 | 0.982 | 0.69 | -1.81 | -0.044(.188) | -0.029(.174) |
| CinguloOperc-rhInsula            | 34  | 23  | 4   | 0.962 | 0.991 | 0.05 | -2.03 | 0.204(.286)  | 0.206(.277)  |
| CinguloOperc-rhInsula            | 34  | 24  | 10  | 0.287 | 0.982 | 1.07 | -1.49 | 0.080(.231)  | 0.111(.243)  |
| CinguloOperc-rhOpercularRolandic | 50  | 3   | 4   | 0.033 | 0.982 | 2.14 | 0.15  | -0.090(.193) | -0.043(.183) |
| CinguloOperc-rhSuperiorFrontal   | 24  | 51  | 24  | 0.6   | 0.982 | 0.53 | -1.9  | 0.059(.259)  | 0.042(.259)  |
| CinguloOperc-rhMiddleFrontal     | 31  | 40  | 26  | 0.568 | 0.982 | 0.57 | -1.88 | 0.091(.211)  | 0.107(.228)  |
| CinguloParietal-lhMiddleCingulum | -6  | -26 | 28  | 0.749 | 0.982 | 0.32 | -1.99 | 0.053(.265)  | 0.043(.266)  |
| CinguloParietal-lhPrecuneus      | -13 | -65 | 32  | 0.3   | 0.982 | 1.04 | -1.52 | -0.043(.280) | -0.011(.259) |
| CinguloParietal-lhPrecuneus      | -11 | -73 | 43  | 0.065 | 0.982 | 1.85 | -0.39 | -0.001(.238) | 0.055(.249)  |
| CinguloParietal-rhMiddleCingulum | 8   | -27 | 28  | 0.646 | 0.982 | 0.46 | -1.93 | 0.027(.252)  | 0.041(.264)  |
| CinguloParietal-rhCuneus         | 16  | -70 | 40  | 0.106 | 0.982 | 1.62 | -0.78 | -0.002(.218) | 0.044(.235)  |
| Default-lhPrecuneus              | -11 | -52 | 36  | 0.542 | 0.982 | 0.61 | -1.86 | 0.001(.195)  | -0.013(.194) |
| Default-lhSuperiorFrontal        | -12 | 27  | 57  | 0.317 | 0.982 | -1   | -1.56 | 0.025(.173)  | 0.006(.162)  |
| Default-lhAngular                | -47 | -58 | 31  | 0.381 | 0.982 | 0.88 | -1.66 | 0.080(.186)  | 0.059(.202)  |
| Default-lhMedialSuperiorFrontal  | -6  | 42  | 35  | 0.199 | 0.982 | 1.29 | -1.26 | 0.046(.213)  | 0.014(.208)  |
| Default-lhMiddleCingulum         | -2  | -18 | 39  | 0.186 | 0.982 | 1.32 | -1.19 | -0.007(.212) | -0.040(.203) |
| Default-lhSuperiorFrontal        | -20 | 30  | 46  | 0.457 | 0.982 | 0.74 | -1.78 | 0.040(.175)  | 0.025(.174)  |
| Default-lhMiddleOccipital        | -39 | -74 | 38  | 0.489 | 0.982 | 0.69 | -1.81 | 0.024(.195)  | 0.042(.219)  |
| Default-lhOrbitalSuperiorFrontal | -28 | 54  | 0   | 0.728 | 0.982 | 0.35 | -1.94 | 0.110(.376)  | 0.093(.384)  |
| Default-lhOrbitalMedialFrontal   | -6  | 55  | -11 | 0.959 | 0.991 | 0.05 | -2.02 | -0.151(.362) | -0.153(.406) |
| Default-lhOrbitalMedialFrontal   | -7  | 38  | -9  | 0.899 | 0.991 | 0.13 | -2.04 | -0.183(.376) | -0.177(.362) |
| Default-lhMiddleTemporal         | -63 | -29 | -7  | 0.278 | 0.982 | 1.09 | -1.44 | -0.027(.343) | 0.015(.314)  |
| Default-lhMiddleTemporal         | -53 | -11 | -16 | 0.911 | 0.991 | 0.11 | -2.01 | -0.068(.236) | -0.071(.231) |
| Default-lhSuperiorFrontal        | -16 | 49  | 37  | 0.308 | 0.982 | 1.02 | -1.54 | -0.043(.198) | -0.066(.191) |
| Default-lhSuperiorFrontal        | -20 | 56  | 28  | 0.658 | 0.982 | 0.44 | -1.93 | -0.026(.209) | -0.038(.230) |
| Default-lhMedialSuperiorFrontal  | -6  | 55  | 18  | 0.103 | 0.982 | 1.63 | -0.76 | -0.070(.215) | -0.111(.212) |

|                                 |     |     |     |       |       |   |      |       |              |              |
|---------------------------------|-----|-----|-----|-------|-------|---|------|-------|--------------|--------------|
| Default-lhSuperiorFrontal       | -16 | 65  | 14  | 0.383 | 0.982 | - | 0.87 | -1.65 | -0.011(.345) | -0.046(.330) |
| Default-lhAnteriorCingulum      | -6  | 45  | 6   | 0.171 | 0.982 | - | 1.37 | -1.15 | -0.031(.213) | -0.067(.221) |
| Default-lhMiddleFrontal         | -26 | 27  | 39  | 0.192 | 0.982 | - | -1.3 | -1.24 | 0.092(.202)  | 0.057(.227)  |
| Default-lhMiddleFrontal         | -29 | 17  | 51  | 0.943 | 0.991 | - | 0.07 | -2.04 | 0.125(.221)  | 0.123(.237)  |
| Default-lhMiddleFrontal         | -42 | 16  | 48  | 0.563 | 0.982 | - | 0.58 | -1.87 | 0.099(.191)  | 0.084(.213)  |
| Default-rhPrecuneus             | 12  | -52 | 34  | 0.713 | 0.982 | - | 0.37 | -1.96 | 0.022(.197)  | 0.013(.194)  |
| Default-rhSupplementaryMotor    | 12  | 22  | 60  | 0.426 | 0.982 | - | -0.8 | -1.71 | 0.030(.150)  | 0.014(.159)  |
| Default-rhAnteriorCingulum      | 8   | 44  | 6   | 0.985 | 0.991 | - | 0.02 | -2.03 | -0.032(.231) | -0.033(.213) |
| Default-rhMiddleCingulum        | 3   | -20 | 38  | 0.283 | 0.982 | - | 1.07 | -1.49 | 0.004(.241)  | -0.024(.220) |
| Default-rhSuperiorFrontal       | 22  | 21  | 46  | 0.866 | 0.991 | - | 0.17 | -2.05 | 0.121(.206)  | 0.117(.204)  |
| Default-rhAngular               | 49  | -53 | 29  | 0.788 | 0.982 | - | 0.27 | -2    | 0.073(.208)  | 0.080(.221)  |
| Default-rhMiddleTemporal        | 62  | -26 | -6  | 0.376 | 0.982 | - | 0.89 | -1.65 | 0.018(.263)  | 0.046(.262)  |
| Default-rhPrecuneus             | 7   | -69 | 50  | 0.047 | 0.982 | - | 1.99 | -0.17 | 0.232(.324)  | 0.320(.376)  |
| Default-rhAngular               | 46  | -67 | 36  | 0.463 | 0.982 | - | 0.73 | -1.78 | 0.058(.192)  | 0.076(.204)  |
| Default-rhOrbitalMedialFrontal  | 5   | 65  | -7  | 0.236 | 0.982 | - | 1.18 | -1.34 | -0.101(.437) | -0.034(.458) |
| Default-rhOrbitalMedialFrontal  | 7   | 48  | -10 | 0.928 | 0.991 | - | 0.09 | -2.04 | -0.144(.421) | -0.148(.401) |
| Default-rhMiddleTemporal        | 58  | -7  | -16 | 0.473 | 0.982 | - | 0.72 | -1.74 | -0.026(.232) | -0.047(.234) |
| Default-rhMiddleFrontal         | 21  | 33  | 42  | 0.275 | 0.982 | - | 1.09 | -1.47 | 0.053(.198)  | 0.029(.188)  |
| Default-rhSuperiorFrontal       | 21  | 43  | 35  | 0.526 | 0.982 | - | 0.63 | -1.85 | 0.031(.229)  | 0.015(.211)  |
| Default-rhSuperiorFrontal       | 16  | 61  | 20  | 0.452 | 0.982 | - | 0.75 | -1.74 | -0.002(.261) | -0.026(.257) |
| Default-rhMedialSuperiorFrontal | 8   | 54  | 14  | 0.463 | 0.982 | - | 0.73 | -1.77 | -0.066(.219) | -0.086(.221) |
| Default-rhMedialSuperiorFrontal | 6   | 55  | 29  | 0.194 | 0.982 | - | -1.3 | -1.21 | -0.055(.217) | -0.090(.223) |
| Default-rhSuperiorFrontal       | 14  | 47  | 42  | 0.707 | 0.982 | - | 0.38 | -1.97 | -0.043(.198) | -0.052(.194) |
| Default-rhMedialSuperiorFrontal | 7   | 44  | 35  | 0.452 | 0.982 | - | 0.75 | -1.76 | 0.021(.198)  | 0.004(.194)  |
| Default-rhMiddleFrontal         | 31  | 19  | 49  | 0.876 | 0.991 | - | 0.16 | -2.02 | 0.140(.249)  | 0.145(.243)  |
| Default-rhSuperiorTemporal      | 54  | 1   | -13 | 0.381 | 0.982 | - | 0.88 | -1.64 | -0.038(.183) | -0.060(.201) |
| DorsalAttn-lhPrecentral         | -27 | -7  | 46  | 0.23  | 0.982 | - | 1.2  | -1.35 | 0.083(.230)  | 0.114(.220)  |
| DorsalAttn-lhMiddleFrontal      | -27 | 2   | 53  | 0.277 | 0.982 | - | 1.09 | -1.46 | 0.161(.223)  | 0.192(.232)  |
| DorsalAttn-lhSuperiorFrontal    | -20 | 6   | 56  | 0.265 | 0.982 | - | 1.12 | -1.44 | 0.148(.230)  | 0.180(.242)  |

|                                            |           |            |           |             |              |             |             |                    |                    |
|--------------------------------------------|-----------|------------|-----------|-------------|--------------|-------------|-------------|--------------------|--------------------|
| DorsalAttn-<br>lhSuperiorFrontal           | -21       | 0          | 63        | 0.568       | 0.982        | 0.57        | -1.86       | 0.074(.169)        | 0.087(.183)        |
| DorsalAttn-<br>lhInferiorParietal          | -31       | -49        | 47        | 0.284       | 0.982        | 1.07        | -1.5        | 0.103(.241)        | 0.132(.230)        |
| DorsalAttn-<br>lhInferiorParietal          | -43       | -45        | 43        | 0.566       | 0.982        | 0.57        | -1.88       | 0.193(.242)        | 0.211(.262)        |
| DorsalAttn-<br>lhInferiorParietal          | -52       | -31        | 40        | 0.501       | 0.982        | 0.67        | -1.82       | 0.007(.207)        | 0.023(.207)        |
| DorsalAttn-<br>lhTriangularInferiorFrontal | -44       | 36         | 8         | 0.366       | 0.982        | 0.91        | -1.63       | -0.058(.235)       | -0.030(.256)       |
| DorsalAttn-<br>lhSuperiorParietal          | -20       | -65        | 51        | 0.291       | 0.982        | 1.06        | -1.52       | 0.062(.247)        | 0.091(.237)        |
| DorsalAttn-<br>lhMiddleOccipital           | -26       | -65        | 32        | 0.999       | 0.999        | 0           | -2.04       | 0.034(.216)        | 0.034(.225)        |
| DorsalAttn-lhPrecuneus                     | -10       | -57        | 60        | 0.339       | 0.982        | 0.96        | -1.62       | 0.045(.223)        | 0.069(.211)        |
| DorsalAttn-lhPrecuneus                     | -7        | -64        | 55        | 0.049       | 0.982        | 1.97        | -0.18       | 0.203(.302)        | 0.280(.330)        |
| DorsalAttn-<br>lhMiddleOccipital           | -30       | -74        | 36        | 0.853       | 0.991        | 0.19        | -2.03       | 0.098(.226)        | 0.092(.266)        |
| DorsalAttn-<br>lhInferiorTemporal          | -46       | -58        | -8        | 0.737       | 0.982        | 0.34        | -1.97       | -0.050(.185)       | -0.057(.184)       |
| DorsalAttn-lhPrecentral                    | -45       | 3          | 32        | 0.529       | 0.982        | 0.63        | -1.85       | 0.060(.206)        | 0.078(.233)        |
| DorsalAttn-lhPrecentral                    | -35       | 6          | 34        | 0.75        | 0.982        | 0.32        | -1.99       | 0.104(.291)        | 0.093(.301)        |
| DorsalAttn-lhMiddleFrontal                 | -38       | 38         | 17        | 0.948       | 0.991        | 0.07        | -2.03       | 0.039(.252)        | 0.041(.271)        |
| DorsalAttn-<br>lhOpercularInferiorFrontal  | -42       | 9          | 22        | 0.637       | 0.982        | 0.47        | -1.93       | 0.079(.259)        | 0.064(.267)        |
| DorsalAttn-lhMiddleFrontal                 | -36       | 33         | 32        | 0.523       | 0.982        | 0.64        | -1.86       | 0.095(.248)        | 0.114(.251)        |
| <b>DorsalAttn-rhPrecuneus</b>              | <b>10</b> | <b>-57</b> | <b>58</b> | <b>0.01</b> | <b>0.982</b> | <b>2.59</b> | <b>1.15</b> | <b>0.066(.251)</b> | <b>0.139(.238)</b> |
| DorsalAttn-rhMiddleFrontal                 | 29        | 2          | 52        | 0.864       | 0.991        | 0.17        | -2.01       | 0.186(.214)        | 0.191(.237)        |
| DorsalAttn-rhPrecentral                    | 30        | -8         | 47        | 0.683       | 0.982        | 0.41        | -1.95       | 0.104(.227)        | 0.116(.237)        |
| DorsalAttn-<br>rhSuperiorFrontal           | 23        | 6          | 58        | 0.577       | 0.982        | 0.56        | -1.89       | 0.195(.259)        | 0.212(.247)        |
| DorsalAttn-<br>rhInferiorParietal          | 39        | -43        | 40        | 0.215       | 0.982        | 1.24        | -1.3        | 0.211(.313)        | 0.256(.301)        |
| DorsalAttn-rhMiddleFrontal                 | 37        | 38         | 13        | 0.46        | 0.982        | 0.74        | -1.76       | 0.035(.254)        | 0.057(.246)        |
| DorsalAttn-<br>rhTriangularInferiorFrontal | 48        | 38         | 2         | 0.221       | 0.982        | 1.22        | -1.32       | -0.006(.312)       | -0.052(.315)       |
| DorsalAttn-<br>rhSuperiorParietal          | 23        | -66        | 52        | 0.068       | 0.982        | 1.82        | -0.47       | 0.067(.260)        | 0.120(.253)        |
| DorsalAttn-<br>rhMiddleOccipital           | 32        | -64        | 34        | 0.976       | 0.991        | 0.03        | -2.03       | 0.061(.230)        | 0.062(.226)        |
| DorsalAttn-<br>rhInferiorParietal          | 34        | -48        | 49        | 0.425       | 0.982        | 0.8         | -1.73       | 0.131(.219)        | 0.156(.258)        |
| DorsalAttn-<br>rhMiddleTemporal            | 57        | -54        | -1        | 0.682       | 0.982        | 0.41        | -1.97       | 0.020(.241)        | 0.031(.245)        |
| DorsalAttn-rhPrecentral                    | 47        | 2          | 38        | 0.036       | 0.982        | 2.09        | 0.06        | -0.005(.192)       | 0.056(.242)        |
| DorsalAttn-<br>rhOpercularInferiorFrontal  | 47        | 8          | 19        | 0.816       | 0.984        | 0.23        | -2          | 0.067(.216)        | 0.073(.204)        |
| FrontoParietal-<br>lhMiddleFrontal         | -38       | 49         | 10        | 0.668       | 0.982        | 0.43        | -1.95       | 0.149(.359)        | 0.132(.330)        |

|                                                |     |     |     |       |       |      |       |              |              |
|------------------------------------------------|-----|-----|-----|-------|-------|------|-------|--------------|--------------|
| FrontoParietal-<br>lhInferiorTemporal          | -56 | -48 | -9  | 0.87  | 0.991 | 0.16 | -2.01 | -0.019(.286) | -0.014(.256) |
| FrontoParietal-<br>lhMedialSuperiorFrontal     | -6  | 29  | 44  | 0.42  | 0.982 | 0.81 | -1.73 | 0.108(.224)  | 0.128(.214)  |
| FrontoParietal-<br>lhOrbitalMiddleFrontal      | -40 | 50  | -5  | 0.842 | 0.991 | -0.2 | -1.97 | 0.106(.330)  | 0.096(.386)  |
| FrontoParietal-lhAngular                       | -34 | -61 | 42  | 0.89  | 0.991 | 0.14 | -2.02 | 0.153(.249)  | 0.149(.269)  |
| FrontoParietal-<br>lhOpercularInferiorFrontal  | -43 | 19  | 34  | 0.353 | 0.982 | 0.93 | -1.61 | 0.205(.337)  | 0.170(.317)  |
| FrontoParietal-<br>lhTriangularInferiorFrontal | -40 | 24  | 23  | 0.167 | 0.982 | 1.38 | -1.13 | 0.110(.252)  | 0.066(.270)  |
| FrontoParietal-<br>lhSuperiorFrontal           | -21 | 63  | 2   | 0.697 | 0.982 | 0.39 | -1.95 | 0.078(.360)  | 0.061(.371)  |
| FrontoParietal-<br>lhMiddleFrontal             | -29 | 51  | 10  | 0.838 | 0.991 | 0.2  | -2.01 | 0.130(.331)  | 0.139(.333)  |
| FrontoParietal-<br>rhSupraMarginal             | 48  | -42 | 42  | 0.284 | 0.982 | 1.07 | -1.49 | 0.210(.253)  | 0.244(.271)  |
| FrontoParietal-<br>rhMiddleFrontal             | 38  | 46  | 8   | 0.968 | 0.991 | 0.04 | -2.01 | 0.082(.299)  | 0.083(.293)  |
| FrontoParietal-<br>rhInferiorTemporal          | 60  | -41 | -11 | 0.751 | 0.982 | 0.32 | -1.98 | 0.076(.235)  | 0.066(.268)  |
| FrontoParietal-<br>rhSupplementaryMotor        | 7   | 26  | 47  | 0.185 | 0.982 | 1.33 | -1.2  | 0.101(.231)  | 0.136(.221)  |
| FrontoParietal-<br>rhOrbitalInferiorFrontal    | 43  | 48  | -5  | 0.786 | 0.982 | 0.27 | -1.93 | 0.116(.333)  | 0.104(.356)  |
| FrontoParietal-<br>rhInferiorParietal          | 42  | -54 | 44  | 0.966 | 0.991 | 0.04 | -2.04 | 0.176(.269)  | 0.175(.293)  |
| FrontoParietal-rhAngular                       | 36  | -57 | 45  | 0.985 | 0.991 | 0.02 | -2.02 | 0.165(.310)  | 0.164(.303)  |
| FrontoParietal-<br>rhMiddleFrontal             | 38  | 29  | 36  | 0.711 | 0.982 | 0.37 | -1.98 | 0.174(.274)  | 0.186(.273)  |
| FrontoParietal-<br>rhTriangularInferiorFrontal | 42  | 29  | 22  | 0.78  | 0.982 | 0.28 | -2    | 0.052(.239)  | 0.043(.258)  |
| FrontoParietal-<br>rhTriangularInferiorFrontal | 39  | 19  | 26  | 0.705 | 0.982 | 0.38 | -1.97 | 0.043(.289)  | 0.030(.281)  |
| FrontoParietal-<br>rhOrbitalSuperiorFrontal    | 28  | 57  | -5  | 0.775 | 0.982 | 0.29 | -1.98 | 0.082(.356)  | 0.096(.405)  |
| FrontoParietal-<br>rhSuperiorFrontal           | 24  | 59  | 5   | 0.614 | 0.982 | 0.51 | -1.89 | 0.051(.344)  | 0.071(.324)  |
| FrontoParietal-<br>rhSuperiorFrontal           | 31  | 52  | 10  | 0.178 | 0.982 | 1.35 | -1.15 | 0.170(.324)  | 0.116(.329)  |
| FrontoParietal-<br>rhMiddleFrontal             | 42  | 20  | 48  | 0.769 | 0.982 | 0.29 | -1.99 | 0.131(.218)  | 0.123(.225)  |
| FrontoParietal-<br>rhMiddleFrontal             | 39  | 10  | 43  | 0.601 | 0.982 | 0.52 | -1.9  | 0.079(.229)  | 0.094(.246)  |
| None-<br>lhSuperiorPoleTemporal                | -29 | 5   | -27 | 0.555 | 0.982 | 0.59 | -1.84 | -0.085(.212) | -0.066(.256) |
| None-lhParaHippocampal                         | -29 | -36 | -8  | 0.085 | 0.982 | 1.72 | -0.59 | 0.000(.144)  | -0.033(.155) |
| None-lhLingual                                 | -18 | -39 | -1  | 0.423 | 0.982 | -0.8 | -1.7  | -0.005(.195) | -0.025(.203) |

|                               |     |     |     |       |       |   |      |       |              |               |
|-------------------------------|-----|-----|-----|-------|-------|---|------|-------|--------------|---------------|
| None-lhMiddlePoleTemporal     | -34 | 17  | -32 | 0.929 | 0.991 | - | 0.09 | -2    | -0.072(.208) | -0.074(.215)  |
| None-lhOrbitalSuperiorFrontal | -23 | 61  | -7  | 0.771 | 0.982 | - | 0.29 | -1.97 | 0.090(.532)  | 0.070(.560)   |
| None-lhAmygdala               | -32 | 3   | -17 | 0.621 | 0.982 | - | 0.49 | -1.88 | -0.114(.341) | -0.094(.323)  |
| None-lhOrbitalInferiorFrontal | -35 | 36  | -10 | 0.364 | 0.982 | - | 0.91 | -1.63 | -0.172(.403) | -0.210(.347)  |
| None-lhOrbitalMiddleFrontal   | -22 | 32  | -14 | 0.053 | 0.982 | - | 1.94 | -0.23 | -0.002(.274) | -0.066(.269)  |
| None-lhOrbitalSuperiorFrontal | -24 | 52  | -13 | 0.982 | 0.991 | - | 0.02 | -2.02 | 0.127(.495)  | 0.125(.474)   |
| None-lhOrbitalSuperiorFrontal | -17 | 47  | -18 | 0.78  | 0.982 | - | 0.28 | -1.96 | 0.055(.540)  | 0.075(.574)   |
| None-lhOrbitalSuperiorFrontal | -13 | 24  | -16 | 0.114 | 0.982 | - | 1.58 | -0.83 | 0.136(.541)  | 0.030(.557)   |
| None-lhRectus                 | -9  | 46  | -21 | 0.771 | 0.982 | - | 0.29 | -1.98 | 0.056(1.325) | -0.010(1.313) |
| None-lhRectus                 | -2  | 34  | -26 | 0.647 | 0.982 | - | 0.46 | -1.92 | 0.163(1.776) | -0.072(1.649) |
| None-lhInferiorTemporal       | -53 | -13 | -29 | 0.616 | 0.982 | - | 0.5  | -1.89 | -0.074(.483) | -0.041(.544)  |
| None-lhInferiorTemporal       | -45 | 9   | -37 | 0.205 | 0.982 | - | 1.27 | -1.25 | -0.125(.201) | -0.093(.209)  |
| None-lhInferiorTemporal       | -55 | -40 | -16 | 0.799 | 0.982 | - | 0.25 | -1.96 | 0.056(.361)  | 0.045(.340)   |
| None-lhFusiform               | -32 | -4  | -45 | 0.243 | 0.982 | - | 1.17 | -1.35 | -0.018(.370) | -0.078(.415)  |
| None-lhInferiorTemporal       | -39 | -13 | -27 | 0.557 | 0.982 | - | 0.59 | -1.81 | -0.048(.266) | -0.068(.270)  |
| None-lhParaHippocampal        | -20 | -13 | -24 | 0.804 | 0.982 | - | 0.25 | -2    | -0.055(.269) | -0.047(.282)  |
| None-lhParaHippocampal        | -22 | -22 | -17 | 0.893 | 0.991 | - | 0.13 | -1.98 | -0.060(.263) | -0.055(.253)  |
| None-lhSuperiorPoleTemporal   | -51 | 7   | -20 | 0.704 | 0.982 | - | 0.38 | -1.96 | -0.059(.206) | -0.068(.189)  |
| None-rhSuperiorPoleTemporal   | 32  | 14  | -30 | 0.607 | 0.982 | - | 0.51 | -1.86 | -0.036(.193) | -0.051(.226)  |
| None-rhParaHippocampal        | 25  | -36 | -5  | 0.624 | 0.982 | - | 0.49 | -1.89 | -0.002(.178) | -0.012(.172)  |
| None-rhParaHippocampal        | 19  | -30 | -10 | 0.123 | 0.982 | - | 1.54 | -0.88 | 0.011(.335)  | -0.055(.355)  |
| None-rhRectus                 | 3   | 19  | -23 | 0.069 | 0.982 | - | 1.82 | -0.44 | -0.180(.729) | -0.018(.734)  |
| None-rhOrbitalInferiorFrontal | 35  | 37  | -8  | 0.306 | 0.982 | - | 1.02 | -1.52 | -0.109(.294) | -0.147(.304)  |
| None-rhOlfactory              | 25  | 9   | -16 | 0.687 | 0.982 | - | 0.4  | -1.93 | -0.089(.303) | -0.074(.315)  |
| None-rhOrbitalSuperiorFrontal | 21  | 30  | -15 | 0.283 | 0.982 | - | 1.07 | -1.48 | -0.012(.283) | -0.047(.274)  |
| None-rhOrbitalSuperiorFrontal | 22  | 51  | -14 | 0.814 | 0.984 | - | 0.24 | -1.97 | 0.179(.481)  | 0.164(.496)   |
| None-rhOrbitalSuperiorFrontal | 12  | 26  | -25 | 0.112 | 0.982 | - | 1.59 | -0.82 | 0.228(1.196) | -0.009(1.236) |
| None-rhRectus                 | 14  | 20  | -15 | 0.344 | 0.982 | - | 0.95 | -1.59 | 0.117(.361)  | 0.072(.390)   |
| None-rhRectus                 | 11  | 39  | -20 | 0.236 | 0.982 | - | 1.19 | -1.34 | -0.112(.881) | 0.021(.913)   |

|                                   |     |     |     |       |       |   |      |       |              |               |
|-----------------------------------|-----|-----|-----|-------|-------|---|------|-------|--------------|---------------|
| None-lhRectus                     | 2   | 39  | -26 | 0.123 | 0.982 | - | 1.54 | -0.88 | 0.248(1.439) | -0.045(1.552) |
| None-rhInferiorTemporal           | 62  | -26 | -16 | 0.351 | 0.982 | - | 0.93 | -1.61 | 0.081(.431)  | 0.134(.471)   |
| None-rhInferiorTemporal           | 55  | -8  | -27 | 0.372 | 0.982 | - | 0.89 | -1.65 | -0.017(.416) | -0.061(.414)  |
| None-rhMiddlePoleTemporal         | 45  | 14  | -30 | 0.905 | 0.991 | - | 0.12 | -2.03 | -0.075(.190) | -0.077(.180)  |
| None-rhParaHippocampal            | 20  | -21 | -22 | 0.029 | 0.982 | - | 2.19 | 0.25  | -0.104(.280) | -0.033(.272)  |
| None-rhFusiform                   | 28  | 0   | -37 | 0.41  | 0.982 | - | 0.82 | -1.66 | -0.117(.481) | -0.065(.507)  |
| None-rhInferiorTemporal           | 37  | 8   | -38 | 0.812 | 0.984 | - | 0.24 | -1.97 | -0.071(.234) | -0.079(.272)  |
| None-rhInferiorTemporal           | 54  | -10 | -37 | 0.216 | 0.982 | - | 1.24 | -1.29 | 0.036(.505)  | -0.036(.482)  |
| None-rhInferiorTemporal           | 56  | -27 | -19 | 0.749 | 0.982 | - | 0.32 | -1.96 | 0.113(.728)  | 0.085(.722)   |
| None-rhFusiform                   | 31  | 2   | -46 | 0.584 | 0.982 | - | 0.55 | -1.86 | -0.084(.424) | -0.052(.479)  |
| None-rhFusiform                   | 40  | -12 | -30 | 0.371 | 0.982 | - | -0.9 | -1.65 | -0.032(.263) | -0.064(.300)  |
| None-rhFusiform                   | 32  | -9  | -36 | 0.902 | 0.991 | - | 0.12 | -1.98 | -0.018(.428) | -0.024(.392)  |
| None-rhInferiorTemporal           | 43  | -24 | -21 | 0.606 | 0.982 | - | 0.52 | -1.89 | -0.092(.339) | -0.068(.381)  |
| None-rhParaHippocampal            | 20  | -11 | -25 | 0.804 | 0.982 | - | 0.25 | -1.97 | -0.050(.270) | -0.059(.271)  |
| None-rhParaHippocampal            | 30  | -19 | -19 | 0.607 | 0.982 | - | 0.51 | -1.9  | -0.045(.282) | -0.062(.260)  |
| RetrosplenialTemporal-lhCalcarine | -14 | -58 | 18  | 0.29  | 0.982 | - | 1.06 | -1.5  | -0.093(.200) | -0.122(.227)  |
| RetrosplenialTemporal-lhLingual   | -9  | -50 | 4   | 0.889 | 0.991 | - | 0.14 | -2.02 | -0.127(.265) | -0.132(.255)  |
| RetrosplenialTemporal-lhFusiform  | -34 | -33 | -15 | 0.878 | 0.991 | - | 0.15 | -2.02 | -0.119(.206) | -0.115(.192)  |
| RetrosplenialTemporal-lhFusiform  | -22 | -37 | -15 | 0.028 | 0.982 | - | -2.2 | 0.28  | -0.053(.209) | -0.108(.208)  |
| RetrosplenialTemporal-rhCalcarine | 14  | -54 | 11  | 0.605 | 0.982 | - | 0.52 | -1.9  | -0.075(.195) | -0.089(.224)  |
| RetrosplenialTemporal-rhFusiform  | 35  | -36 | -12 | 0.105 | 0.982 | - | 1.62 | -0.78 | -0.153(.236) | -0.110(.222)  |
| RetrosplenialTemporal-rhFusiform  | 35  | -24 | -20 | 0.536 | 0.982 | - | 0.62 | -1.86 | -0.096(.231) | -0.080(.226)  |
| RetrosplenialTemporal-rhFusiform  | 24  | -36 | -13 | 0.311 | 0.982 | - | 1.01 | -1.54 | -0.072(.233) | -0.099(.222)  |
| Saliency-lhAnteriorCingulum       | -10 | 34  | 22  | 0.46  | 0.982 | - | 0.74 | -1.76 | 0.098(.193)  | 0.078(.227)   |
| Saliency-lhInsula                 | -32 | 17  | -8  | 0.961 | 0.991 | - | 0.05 | -2.03 | 0.113(.262)  | 0.111(.272)   |
| Saliency-rhAnteriorCingulum       | 8   | 35  | 23  | 0.312 | 0.982 | - | 1.01 | -1.53 | 0.113(.237)  | 0.084(.236)   |
| Saliency-rhInsula                 | 31  | 23  | -5  | 0.58  | 0.982 | - | 0.55 | -1.89 | 0.147(.280)  | 0.167(.301)   |
| SMhand-lhSuperiorParietal         | -19 | -49 | 65  | 0.071 | 0.982 | - | 1.81 | -0.47 | -0.089(.142) | -0.055(.157)  |
| SMhand-lhPrecuneus                | -11 | -48 | 60  | 0.707 | 0.982 | - | 0.38 | -1.95 | -0.070(.199) | -0.061(.202)  |
| SMhand-lhLobuleParacentral        | -16 | -33 | 66  | 0.433 | 0.982 | - | 0.78 | -1.73 | -0.134(.215) | -0.113(.225)  |

|                             |     |     |    |       |       |      |       |              |              |
|-----------------------------|-----|-----|----|-------|-------|------|-------|--------------|--------------|
| SMhand-lhLobuleParacentral  | -11 | -29 | 70 | 0.703 | 0.982 | 0.38 | -1.94 | -0.062(.146) | -0.055(.153) |
| SMhand-lhLobuleParacentral  | -7  | -20 | 74 | 0.088 | 0.982 | 1.71 | -0.61 | -0.083(.211) | -0.038(.210) |
| SMhand-lhPrecuneus          | -11 | -41 | 65 | 0.503 | 0.982 | 0.67 | -1.79 | -0.062(.142) | -0.047(.180) |
| SMhand-lhLobuleParacentral  | -5  | -28 | 60 | 0.767 | 0.982 | 0.3  | -1.98 | -0.061(.184) | -0.055(.166) |
| SMhand-lhMiddleCingulum     | -5  | -16 | 49 | 0.424 | 0.982 | -0.8 | -1.72 | -0.063(.207) | -0.081(.193) |
| SMhand-lhPostcentral        | -36 | -30 | 54 | 0.085 | 0.982 | 1.73 | -0.6  | -0.136(.249) | -0.084(.246) |
| SMhand-lhPrecentral         | -37 | -23 | 62 | 0.336 | 0.982 | 0.96 | -1.57 | -0.070(.165) | -0.050(.168) |
| SMhand-lhPrecentral         | -20 | -25 | 64 | 0.361 | 0.982 | 0.91 | -1.64 | -0.036(.170) | -0.054(.164) |
| SMhand-lhPrecentral         | -23 | -14 | 64 | 0.238 | 0.982 | 1.18 | -1.35 | -0.052(.146) | -0.031(.151) |
| SMhand-lhLobuleParacentral  | -17 | -9  | 68 | 0.704 | 0.982 | 0.38 | -1.95 | -0.029(.143) | -0.023(.138) |
| SMhand-lhSuperiorParietal   | -29 | -45 | 62 | 0.514 | 0.982 | 0.65 | -1.83 | -0.080(.166) | -0.067(.175) |
| SMhand-lhInferiorParietal   | -54 | -21 | 41 | 0.413 | 0.982 | 0.82 | -1.7  | -0.080(.209) | -0.060(.197) |
| SMhand-lhPostcentral        | -35 | -35 | 42 | 0.84  | 0.991 | 0.2  | -2.02 | -0.005(.206) | 0.000(.209)  |
| SMhand-lhPostcentral        | -28 | -37 | 61 | 0.806 | 0.982 | 0.25 | -2    | -0.044(.158) | -0.049(.153) |
| SMhand-lhPostcentral        | -47 | -31 | 55 | 0.143 | 0.982 | 1.46 | -1    | -0.070(.213) | -0.035(.194) |
| SMhand-rhSuperiorParietal   | 21  | -48 | 66 | 0.069 | 0.982 | 1.82 | -0.47 | -0.090(.141) | -0.055(.163) |
| SMhand-rhPostcentral        | 16  | -33 | 68 | 0.58  | 0.982 | 0.55 | -1.88 | -0.129(.232) | -0.113(.243) |
| SMhand-rhLobuleParacentral  | 5   | -27 | 65 | 0.456 | 0.982 | 0.75 | -1.76 | -0.039(.187) | -0.054(.173) |
| SMhand-rhPostcentral        | 12  | -41 | 67 | 0.893 | 0.991 | 0.13 | -2    | -0.046(.166) | -0.049(.178) |
| SMhand-rhSupplementaryMotor | 5   | -17 | 52 | 0.972 | 0.991 | 0.04 | -2.03 | -0.078(.205) | -0.077(.207) |
| SMhand-rhMiddleCingulum     | 7   | -8  | 51 | 0.348 | 0.982 | 0.94 | -1.62 | -0.100(.185) | -0.079(.187) |
| SMhand-rhPrecentral         | 38  | -22 | 60 | 0.387 | 0.982 | 0.87 | -1.67 | -0.073(.150) | -0.057(.152) |
| SMhand-rhPrecentral         | 20  | -25 | 65 | 0.625 | 0.982 | 0.49 | -1.92 | -0.047(.191) | -0.056(.159) |
| SMhand-rhPrecentral         | 12  | -28 | 70 | 0.316 | 0.982 | -1   | -1.54 | -0.030(.163) | -0.050(.160) |
| SMhand-rhPrecentral         | 29  | -14 | 64 | 0.631 | 0.982 | 0.48 | -1.92 | -0.057(.173) | -0.047(.182) |
| SMhand-rhPrecentral         | 17  | -17 | 71 | 0.522 | 0.982 | 0.64 | -1.81 | -0.045(.158) | -0.057(.152) |
| SMhand-rhSuperiorFrontal    | 21  | -6  | 65 | 0.52  | 0.982 | 0.64 | -1.84 | -0.001(.174) | 0.011(.160)  |
| SMhand-rhPostcentral        | 30  | -42 | 60 | 0.117 | 0.982 | 1.57 | -0.87 | -0.115(.209) | -0.080(.191) |
| SMhand-rhInferiorParietal   | 34  | -41 | 52 | 0.458 | 0.982 | 0.74 | -1.75 | 0.017(.260)  | -0.006(.245) |
| SMhand-rhSupraMarginal      | 40  | -32 | 40 | 0.575 | 0.982 | 0.56 | -1.89 | -0.001(.206) | 0.013(.212)  |
| SMhand-rhPostcentral        | 28  | -35 | 63 | 0.994 | 0.997 | 0.01 | -2.01 | -0.046(.156) | -0.046(.151) |
| SMhand-rhPostcentral        | 39  | -35 | 58 | 0.383 | 0.982 | 0.87 | -1.67 | -0.062(.172) | -0.043(.183) |
| SMhand-rhPostcentral        | 37  | -26 | 51 | 0.195 | 0.982 | 1.3  | -1.24 | -0.136(.235) | -0.101(.228) |
| SMhand-rhPostcentral        | 49  | -26 | 52 | 0.794 | 0.982 | 0.26 | -2.01 | -0.059(.176) | -0.053(.193) |
| SMhand-rhSupraMarginal      | 53  | -23 | 39 | 0.795 | 0.982 | 0.26 | -2.01 | -0.053(.212) | -0.047(.197) |
| SMmouth-lhPostcentral       | -52 | -8  | 38 | 0.919 | 0.991 | -0.1 | -2.03 | -0.060(.176) | -0.062(.175) |
| SMmouth-lhPostcentral       | -42 | -12 | 50 | 0.979 | 0.991 | 0.03 | -2.02 | -0.036(.149) | -0.035(.176) |
| SMmouth-lhPostcentral       | -52 | -12 | 30 | 0.806 | 0.982 | 0.25 | -2.01 | -0.107(.229) | -0.100(.255) |
| SMmouth-lhPostcentral       | -46 | -18 | 53 | 0.067 | 0.982 | 1.83 | -0.41 | -0.141(.249) | -0.085(.251) |

|                                         |     |     |     |       |       |      |       |              |              |
|-----------------------------------------|-----|-----|-----|-------|-------|------|-------|--------------|--------------|
| SMmouth-rhPostcentral                   | 50  | -7  | 36  | 0.768 | 0.982 | -0.3 | -2    | -0.063(.177) | -0.069(.185) |
| SMmouth-rhPrecentral                    | 42  | -11 | 47  | 0.324 | 0.982 | 0.99 | -1.58 | -0.029(.145) | -0.049(.172) |
| SMmouth-rhPostcentral                   | 54  | -8  | 26  | 0.081 | 0.982 | 1.75 | -0.59 | -0.154(.252) | -0.103(.248) |
| SMmouth-rhPrecentral                    | 48  | -15 | 49  | 0.949 | 0.991 | 0.06 | -2.02 | -0.113(.226) | -0.115(.231) |
| Subcortical-lhCerebellum                | NA  | NA  | NA  | 0.8   | 0.982 | 0.25 | -2.05 | 0.061(.261)  | 0.069(.259)  |
| Subcortical-lhThalamus                  | NA  | NA  | NA  | 0.681 | 0.982 | 0.41 | -1.98 | 0.022(.137)  | 0.028(.131)  |
| Subcortical-lhCaudate                   | NA  | NA  | NA  | 0.494 | 0.982 | 0.68 | -1.85 | 0.021(.199)  | 0.036(.200)  |
| Subcortical-lhPutamen                   | NA  | NA  | NA  | 0.894 | 0.991 | 0.13 | -2.05 | -0.022(.173) | -0.019(.165) |
| Subcortical-lhPallidum                  | NA  | NA  | NA  | 0.29  | 0.982 | 1.06 | -1.51 | -0.009(.141) | 0.008(.133)  |
| Subcortical-brainStem                   | NA  | NA  | NA  | 0.53  | 0.982 | 0.63 | -1.85 | 0.023(.148)  | 0.035(.160)  |
| Subcortical-lhHippocampus               | NA  | NA  | NA  | 0.466 | 0.982 | 0.73 | -1.79 | -0.060(.154) | -0.073(.153) |
| Subcortical-lhAmygdala                  | NA  | NA  | NA  | 0.979 | 0.991 | 0.03 | -2.05 | -0.070(.198) | -0.069(.189) |
| Subcortical-lhAccumbens                 | NA  | NA  | NA  | 0.473 | 0.982 | 0.72 | -1.82 | -0.055(.232) | -0.038(.211) |
| Subcortical-lhVentraldc                 | NA  | NA  | NA  | 0.747 | 0.982 | 0.32 | -2.01 | 0.039(.157)  | 0.033(.168)  |
| Subcortical-rhCerebellum                | NA  | NA  | NA  | 0.637 | 0.982 | 0.47 | -1.98 | 0.043(.281)  | 0.057(.254)  |
| Subcortical-rhThalamus                  | NA  | NA  | NA  | 0.695 | 0.982 | 0.39 | -2    | 0.033(.150)  | 0.040(.144)  |
| Subcortical-rhCaudate                   | NA  | NA  | NA  | 0.459 | 0.982 | 0.74 | -1.81 | 0.018(.196)  | 0.035(.201)  |
| Subcortical-rhPutamen                   | NA  | NA  | NA  | 0.651 | 0.982 | 0.45 | -1.96 | -0.027(.165) | -0.019(.167) |
| Subcortical-rhPallidum                  | NA  | NA  | NA  | 0.972 | 0.991 | 0.04 | -2.05 | 0.026(.133)  | 0.025(.137)  |
| Subcortical-rhHippocampus               | NA  | NA  | NA  | 0.105 | 0.982 | 1.62 | -0.81 | -0.037(.153) | -0.066(.153) |
| Subcortical-rhAmygdala                  | NA  | NA  | NA  | 0.595 | 0.982 | 0.53 | -1.91 | -0.050(.170) | -0.062(.197) |
| Subcortical-rhAccumbens                 | NA  | NA  | NA  | 0.552 | 0.982 | 0.59 | -1.9  | -0.012(.193) | -0.025(.189) |
| Subcortical-rhVentraldc                 | NA  | NA  | NA  | 0.619 | 0.982 | 0.5  | -1.95 | 0.029(.178)  | 0.039(.163)  |
| VentralAttn-lhSupplementaryMotor        | -4  | 12  | 65  | 0.224 | 0.982 | 1.22 | -1.32 | 0.048(.138)  | 0.073(.169)  |
| VentralAttn-lhMiddleTemporal            | -45 | -54 | 15  | 0.887 | 0.991 | 0.14 | -2.02 | 0.045(.212)  | 0.041(.233)  |
| VentralAttn-lhMiddleTemporal            | -52 | -56 | 11  | 0.729 | 0.982 | 0.35 | -1.98 | -0.002(.197) | 0.007(.225)  |
| VentralAttn-lhMiddleTemporal            | -48 | -40 | 2   | 0.804 | 0.982 | 0.25 | -2.02 | -0.021(.164) | -0.016(.174) |
| VentralAttn-lhTriangularInferiorFrontal | -50 | 21  | 11  | 0.122 | 0.982 | 1.55 | -0.89 | 0.037(.225)  | -0.008(.239) |
| VentralAttn-lhOrbitalInferiorFrontal    | -47 | 39  | -9  | 0.228 | 0.982 | 1.21 | -1.3  | 0.031(.331)  | -0.023(.353) |
| VentralAttn-lhInsula                    | -29 | 20  | -14 | 0.118 | 0.982 | 1.57 | -0.87 | -0.020(.198) | -0.059(.206) |
| VentralAttn-lhOrbitalInferiorFrontal    | -44 | 33  | -7  | 0.566 | 0.982 | 0.57 | -1.86 | -0.056(.240) | -0.075(.273) |
| VentralAttn-lhTriangularInferiorFrontal | -45 | 29  | 1   | 0.428 | 0.982 | 0.79 | -1.7  | -0.124(.258) | -0.099(.257) |
| VentralAttn-lhPrecentral                | -39 | 5   | 48  | 0.107 | 0.982 | 1.61 | -0.8  | 0.070(.211)  | 0.114(.230)  |

|                                         |     |     |     |       |       |      |       |              |              |
|-----------------------------------------|-----|-----|-----|-------|-------|------|-------|--------------|--------------|
| VentralAttn-lhMiddleTemporal            | -59 | -18 | -3  | 0.323 | 0.982 | 0.99 | -1.56 | -0.082(.210) | -0.057(.210) |
| VentralAttn-rhMiddleTemporal            | 58  | -45 | 9   | 0.15  | 0.982 | 1.44 | -1.03 | -0.045(.200) | -0.010(.202) |
| VentralAttn-rhMiddleTemporal            | 61  | -39 | 2   | 0.418 | 0.982 | -    | -1.72 | 0.022(.214)  | 0.000(.227)  |
| VentralAttn-rhSuperiorTemporal          | 57  | -17 | -3  | 0.373 | 0.982 | 0.89 | -1.62 | -0.073(.201) | -0.052(.191) |
| VentralAttn-rhSuperiorTemporal          | 47  | -40 | 13  | 0.348 | 0.982 | 0.94 | -1.62 | -0.039(.206) | -0.017(.198) |
| VentralAttn-rhMiddleTemporal            | 46  | -37 | 3   | 0.89  | 0.991 | 0.14 | -2.01 | -0.030(.202) | -0.027(.182) |
| VentralAttn-rhSuperiorTemporal          | 48  | -26 | 0   | 0.636 | 0.982 | 0.47 | -1.9  | -0.048(.182) | -0.037(.182) |
| VentralAttn-rhTriangularInferiorFrontal | 52  | 24  | 10  | 0.899 | 0.991 | 0.13 | -2.03 | -0.002(.286) | -0.006(.271) |
| VentralAttn-rhOrbitalInferiorFrontal    | 48  | 38  | -9  | 0.213 | 0.982 | 1.25 | -1.28 | 0.024(.341)  | -0.026(.330) |
| VentralAttn-rhOrbitalInferiorFrontal    | 45  | 31  | -6  | 0.957 | 0.991 | 0.05 | -2.03 | -0.072(.243) | -0.074(.241) |
| VentralAttn-rhInsula                    | 27  | 20  | -15 | 0.917 | 0.991 | 0.1  | -2.03 | -0.023(.237) | -0.020(.222) |
| VentralAttn-rhSuperiorTemporal          | 57  | -6  | -8  | 0.898 | 0.991 | 0.13 | -2    | -0.067(.193) | -0.064(.190) |
| VentralAttn-rhMiddleTemporal            | 47  | -22 | -8  | 0.666 | 0.982 | 0.43 | -1.92 | -0.008(.246) | -0.021(.233) |
| Visual-lhSuperiorOccipital              | -18 | -86 | 22  | 0.929 | 0.991 | 0.09 | -2.03 | -0.016(.206) | -0.014(.212) |
| Visual-lhLingual                        | -17 | -60 | -5  | 0.236 | 0.982 | 1.19 | -1.38 | -0.007(.239) | 0.027(.241)  |
| Visual-lhCalcarine                      | -11 | -83 | 4   | 0.231 | 0.982 | 1.2  | -1.36 | 0.061(.325)  | 0.106(.319)  |
| Visual-lhLingual                        | -22 | -58 | 2   | 0.083 | 0.982 | 1.74 | -0.59 | -0.014(.301) | 0.057(.340)  |
| Visual-lhLingual                        | -10 | -58 | 3   | 0.869 | 0.991 | 0.16 | -2.02 | -0.063(.467) | -0.073(.485) |
| Visual-lhLingual                        | -17 | -46 | -4  | 0.27  | 0.982 | -1.1 | -1.47 | 0.034(.280)  | -0.003(.292) |
| Visual-lhSuperiorOccipital              | -14 | -77 | 27  | 0.763 | 0.982 | 0.3  | -1.99 | -0.035(.207) | -0.027(.200) |
| Visual-lhMiddleOccipital                | -31 | -84 | 9   | 0.477 | 0.982 | 0.71 | -1.8  | -0.026(.218) | -0.046(.235) |
| Visual-lhMiddleOccipital                | -34 | -87 | 0   | 0.977 | 0.991 | 0.03 | -2.02 | -0.051(.242) | -0.050(.264) |
| Visual-lhMiddleOccipital                | -43 | -68 | 10  | 0.616 | 0.982 | 0.5  | -1.92 | -0.050(.194) | -0.039(.183) |
| Visual-lhFusiform                       | -29 | -59 | -9  | 0.569 | 0.982 | 0.57 | -1.87 | -0.052(.217) | -0.037(.221) |
| Visual-lhFusiform                       | -34 | -64 | -16 | 0.833 | 0.991 | 0.21 | -2.01 | 0.013(.272)  | 0.005(.294)  |
| Visual-lhFusiform                       | -34 | -44 | -22 | 0.803 | 0.982 | 0.25 | -2.01 | -0.034(.254) | -0.027(.252) |
| Visual-lhCuneus                         | -5  | -88 | 19  | 0.759 | 0.982 | 0.31 | -1.98 | 0.016(.226)  | 0.024(.229)  |
| Visual-lhLingual                        | -9  | -78 | -4  | 0.544 | 0.982 | 0.61 | -1.86 | 0.071(.309)  | 0.093(.303)  |
| Visual-lhInferiorOccipital              | -41 | -72 | -6  | 0.383 | 0.982 | 0.87 | -1.67 | -0.094(.242) | -0.070(.231) |
| Visual-lhInferiorOccipital              | -25 | -97 | -8  | 0.554 | 0.982 | 0.59 | -1.85 | -0.073(.418) | -0.042(.432) |
| Visual-lhLingual                        | -23 | -82 | -12 | 0.66  | 0.982 | 0.44 | -1.95 | 0.050(.298)  | 0.065(.281)  |
| Visual-rhSuperiorOccipital              | 22  | -85 | 24  | 0.414 | 0.982 | 0.82 | -1.73 | -0.015(.209) | -0.037(.226) |
| Visual-rhFusiform                       | 22  | -46 | -10 | 0.65  | 0.982 | 0.45 | -1.91 | -0.055(.206) | -0.043(.221) |
| Visual-rhCalcarine                      | 16  | -74 | 9   | 0.342 | 0.982 | 0.95 | -1.62 | 0.028(.341)  | 0.063(.312)  |
| Visual-rhLingual                        | 20  | -45 | -4  | 0.973 | 0.991 | 0.03 | -2.03 | -0.018(.332) | -0.016(.293) |

|                           |    |     |     |       |       |      |       |              |              |
|---------------------------|----|-----|-----|-------|-------|------|-------|--------------|--------------|
| Visual-rhLingual          | 16 | -60 | -5  | 0.569 | 0.982 | 0.57 | -1.89 | 0.005(.246)  | 0.021(.249)  |
| Visual-rhInferiorParietal | 27 | -55 | 54  | 0.31  | 0.982 | 1.01 | -1.54 | 0.016(.218)  | 0.043(.224)  |
| Visual-rhCuneus           | 18 | -78 | 34  | 0.95  | 0.991 | 0.06 | -2.03 | -0.034(.204) | -0.033(.203) |
| Visual-rhCuneus           | 8  | -86 | 32  | 0.903 | 0.991 | 0.12 | -2.02 | -0.022(.281) | -0.018(.262) |
| Visual-rhMiddleOccipital  | 35 | -77 | 21  | 0.413 | 0.982 | 0.82 | -1.71 | -0.030(.234) | -0.053(.233) |
| Visual-rhMiddleOccipital  | 32 | -86 | 2   | 0.439 | 0.982 | 0.77 | -1.75 | -0.107(.232) | -0.081(.279) |
| Visual-rhMiddleTemporal   | 44 | -67 | 2   | 0.422 | 0.982 | 0.8  | -1.73 | -0.093(.165) | -0.075(.192) |
| Visual-rhInferiorTemporal | 47 | -52 | -12 | 0.773 | 0.982 | 0.29 | -1.99 | -0.080(.188) | -0.073(.197) |
| Visual-rhMiddleTemporal   | 49 | -54 | 9   | 0.935 | 0.991 | 0.08 | -2.02 | -0.013(.199) | -0.014(.190) |
| Visual-rhFusiform         | 31 | -46 | -6  | 0.696 | 0.982 | 0.39 | -1.96 | -0.122(.273) | -0.109(.272) |
| Visual-rhFusiform         | 27 | -69 | -7  | 0.91  | 0.991 | 0.11 | -2.04 | -0.005(.248) | -0.001(.242) |
| Visual-rhFusiform         | 35 | -44 | -20 | 0.157 | 0.982 | 1.41 | -1.08 | -0.002(.293) | -0.046(.258) |
| Visual-rhCuneus           | 14 | -92 | 15  | 0.51  | 0.982 | 0.66 | -1.84 | -0.017(.273) | 0.002(.253)  |
| Visual-rhLingual          | 10 | -74 | -2  | 0.907 | 0.991 | 0.12 | -2.03 | 0.057(.288)  | 0.061(.289)  |
| Visual-rhLingual          | 20 | -87 | -7  | 0.336 | 0.982 | 0.96 | -1.59 | 0.035(.295)  | -0.003(.329) |
| Visual-rhCuneus           | 5  | -80 | 23  | 0.414 | 0.982 | 0.82 | -1.71 | 0.015(.249)  | 0.040(.256)  |
| Visual-rhCuneus           | 15 | -70 | 23  | 0.097 | 0.982 | 1.66 | -0.72 | -0.032(.206) | 0.015(.238)  |

\* = qFDR < .05. Bold = qFDR < .05 or  $\ln(\text{BF}_{10}) > 1.1$ . Note that x, y and z values here refer to the Montreal Neurological Institute (MNI) coordinates at the centroid of each cortical-surface region-of-interest (ROI) of a standard MNI brain. The label for each cortical-surface ROI is based on the Automated Anatomical Labeling (AAL) algorithm<sup>2</sup> via the mni2aal R package (<https://github.com/yunshuan/label4MRI>). The label for each subcortical-volumetric ROI is based on Freesurfer's segmentation algorithm<sup>3</sup>, applied on each participant's individual brain space. Given that individual brain space was used for subcortical ROIs, their x, y and z coordinates are not given here. \* = qFDR < .05. Bold = qFDR < .05 or  $\ln(\text{BF}_{10}) > 1.1$ . The value of  $\ln(\text{BF}_{10}) > 1.1$  and < -1.2 are interpreted as substantial evidence for the alternative (of there being a difference), and null hypotheses (of there being *no* difference), respectively.

**eTable 13.** Group differences between children with vs. without ADHD during working-memory [Two-Back > Zero-Back] in the N-Back task-fMRI activation

| Name: Network-ROI                   | x          | y          | z         | $p$          | $q_{FDR}$     | $t$         | $\ln(BF_{10})$ | With ADHD<br>$M(SD)$ | Without ADHD<br>$M(SD)$ |
|-------------------------------------|------------|------------|-----------|--------------|---------------|-------------|----------------|----------------------|-------------------------|
| <b>Auditory-lhHeschl</b>            | <b>-32</b> | <b>-29</b> | <b>16</b> | <b>0</b>     | <b>0.015*</b> | <b>3.72</b> | <b>4.1</b>     | <b>-0.026(.205)</b>  | <b>-0.073(.215)</b>     |
| Auditory-lhSupraMarginal            | -46        | -41        | 26        | 0.618        | 0.78          | -0.5        | -2.6           | -0.065(.253)         | -0.072(.253)            |
| Auditory-lhOpercularRolandic        | -36        | -34        | 20        | 0.039        | 0.151         | 2.07        | -0.62          | -0.059(.252)         | -0.089(.245)            |
| <b>Auditory-lhSuperiorTemporal</b>  | <b>-53</b> | <b>-21</b> | <b>5</b>  | <b>0.003</b> | <b>0.041*</b> | <b>2.95</b> | <b>1.56</b>    | <b>-0.030(.197)</b>  | <b>-0.064(.190)</b>     |
| Auditory-lhSuperiorTemporal         | -60        | -38        | 16        | 0.743        | 0.86          | 0.33        | -2.67          | -0.044(.214)         | -0.048(.193)            |
| Auditory-lhSuperiorTemporal         | -59        | -30        | 11        | 0.365        | 0.561         | 0.91        | -2.3           | -0.059(.189)         | -0.069(.180)            |
| <b>Auditory-lhSuperiorTemporal</b>  | <b>-41</b> | <b>-38</b> | <b>14</b> | <b>0.002</b> | <b>0.035*</b> | <b>-3.1</b> | <b>2.01</b>    | <b>-0.033(.228)</b>  | <b>-0.072(.216)</b>     |
| Auditory-lhInsula                   | -34        | -22        | 10        | 0.041        | 0.156         | 2.04        | -0.67          | -0.032(.195)         | -0.054(.189)            |
| Auditory-lhInsula                   | -37        | -14        | 19        | 0.016        | 0.099         | -2.4        | 0.11           | -0.090(.233)         | -0.123(.238)            |
| Auditory-lhOpercularRolandic        | -52        | -14        | 15        | 0.033        | 0.136         | 2.14        | -0.47          | -0.102(.269)         | -0.135(.260)            |
| Auditory-lhSupraMarginal            | -51        | -22        | 19        | 0.039        | 0.151         | 2.07        | -0.62          | -0.087(.229)         | -0.114(.218)            |
| Auditory-lhSuperiorTemporal         | -54        | -1         | -1        | 0.01         | 0.074         | 2.56        | 0.53           | -0.034(.177)         | -0.059(.169)            |
| Auditory-rhInsula                   | 34         | -22        | 13        | 0.011        | 0.074         | 2.56        | 0.5            | -0.039(.198)         | -0.070(.209)            |
| <b>Auditory-rhOpercularRolandic</b> | <b>36</b>  | <b>-31</b> | <b>19</b> | <b>0.005</b> | <b>0.052</b>  | <b>2.81</b> | <b>1.16</b>    | <b>-0.054(.235)</b>  | <b>-0.091(.226)</b>     |
| Auditory-rhSuperiorTemporal         | 54         | -16        | 5         | 0.156        | 0.341         | 1.42        | -1.73          | -0.037(.200)         | -0.053(.184)            |
| Auditory-rhSuperiorTemporal         | 59         | -39        | 15        | 0.029        | 0.132         | 2.18        | -0.38          | -0.005(.192)         | -0.029(.182)            |
| Auditory-rhSuperiorTemporal         | 62         | -24        | 1         | 0.018        | 0.1           | 2.37        | 0.06           | -0.029(.229)         | -0.060(.220)            |
| Auditory-rhSuperiorTemporal         | 60         | -25        | 10        | 0.032        | 0.132         | 2.15        | -0.44          | -0.046(.195)         | -0.070(.184)            |
| Auditory-rhInsula                   | 38         | -12        | 20        | 0.01         | 0.074         | 2.59        | 0.58           | -0.107(.251)         | -0.144(.246)            |
| <b>Auditory-rhInsula</b>            | <b>37</b>  | <b>-10</b> | <b>12</b> | <b>0.001</b> | <b>0.021*</b> | <b>-3.4</b> | <b>2.96</b>    | <b>-0.037(.230)</b>  | <b>-0.081(.226)</b>     |
| Auditory-rhOpercularRolandic        | 61         | -2         | 11        | 0.639        | 0.791         | 0.47        | -2.62          | -0.121(.259)         | -0.128(.259)            |
| Auditory-rhOpercularRolandic        | 54         | -14        | 17        | 0.018        | 0.1           | 2.37        | 0.03           | -0.104(.251)         | -0.138(.240)            |
| Auditory-rhSuperiorTemporal         | 40         | -22        | 3         | 0.54         | 0.717         | 0.61        | -2.53          | -0.102(.352)         | -0.114(.349)            |
| Auditory-rhSuperiorTemporal         | 56         | 2          | -2        | 0.337        | 0.53          | 0.96        | -2.25          | -0.053(.168)         | -0.062(.156)            |

|                                               |            |            |           |              |               |          |             |              |                     |                     |
|-----------------------------------------------|------------|------------|-----------|--------------|---------------|----------|-------------|--------------|---------------------|---------------------|
| CinguloOperc-<br>lhMiddleCingulum             | -17        | -36        | 43        | 0.146        | 0.322         | -        | 1.45        | -1.69        | -0.036(.167)        | -0.050(.166)        |
| CinguloOperc-<br>lhMiddleCingulum             | -9         | 0          | 43        | 0.78         | 0.885         | 0.28     | -2.7        | -0.012(.170) | -0.010(.156)        |                     |
| CinguloOperc-<br>lhMiddleCingulum             | -8         | 15         | 34        | 0.388        | 0.581         | 0.86     | -2.36       | 0.031(.192)  | 0.041(.182)         |                     |
| CinguloOperc-<br>lhAnteriorCingulum           | -9         | 25         | 28        | 0.659        | 0.806         | 0.44     | -2.63       | 0.106(.262)  | 0.099(.254)         |                     |
| CinguloOperc-<br>lhSupplementaryMotor         | -8         | -9         | 63        | 0.219        | 0.41          | 1.23     | -1.98       | -0.018(.156) | -0.029(.150)        |                     |
| CinguloOperc-lhPrecentral                     | -42        | -4         | 47        | 0.945        | 0.975         | 0.07     | -2.73       | 0.068(.233)  | 0.069(.223)         |                     |
| CinguloOperc-<br>lhSupraMarginal              | -58        | -41        | 36        | 0.88         | 0.95          | 0.15     | -2.72       | 0.023(.218)  | 0.025(.207)         |                     |
| <b>CinguloOperc-<br/>lhSuperiorTemporal</b>   | <b>-39</b> | <b>-16</b> | <b>-5</b> | <b>0.003</b> | <b>0.04*</b>  | <b>-</b> | <b>2.96</b> | <b>1.6</b>   | <b>-0.038(.191)</b> | <b>-0.071(.184)</b> |
| CinguloOperc-lhInsula                         | -39        | -2         | -12       | 0.254        | 0.448         | 1.14     | -2.08       | -0.057(.177) | -0.068(.171)        |                     |
| CinguloOperc-lhInsula                         | -38        | 3          | 12        | 0.322        | 0.522         | 0.99     | -2.24       | -0.028(.190) | -0.038(.179)        |                     |
| CinguloOperc-lhInsula                         | -37        | 1          | 6         | 0.421        | 0.612         | 0.81     | -2.4        | -0.043(.191) | -0.052(.176)        |                     |
| CinguloOperc-lhInsula                         | -37        | 9          | -1        | 0.483        | 0.677         | 0.7      | -2.48       | -0.004(.210) | 0.003(.191)         |                     |
| <b>CinguloOperc-lhInsula</b>                  | <b>-29</b> | <b>24</b>  | <b>8</b>  | <b>0.001</b> | <b>0.03*</b>  | <b>-</b> | <b>3.22</b> | <b>2.36</b>  | <b>0.075(.228)</b>  | <b>0.117(.225)</b>  |
| CinguloOperc-<br>lhOpercularRolandic          | -60        | -4         | 9         | 0.006        | 0.061         | 2.73     | 0.94        | -0.084(.278) | -0.126(.260)        |                     |
| CinguloOperc-<br>lhSuperiorTemporal           | -55        | -32        | 23        | 0.075        | 0.217         | 1.78     | -1.15       | -0.101(.214) | -0.123(.211)        |                     |
| CinguloOperc-<br>lhSupraMarginal              | -59        | -24        | 31        | 0.327        | 0.527         | 0.98     | -2.27       | -0.062(.202) | -0.073(.198)        |                     |
| CinguloOperc-<br>lhOpercularRolandic          | -52        | -1         | 5         | 0.061        | 0.188         | 1.88     | -0.99       | -0.072(.221) | -0.095(.206)        |                     |
| CinguloOperc-<br>lhOpercularInferiorFrontal   | -49        | 8          | 11        | 0.645        | 0.791         | 0.46     | -2.62       | 0.033(.204)  | 0.038(.210)         |                     |
| CinguloOperc-<br>lhMiddleFrontal              | -27        | 47         | 21        | 0.23         | 0.423         | 1.2      | -2.02       | 0.049(.278)  | 0.068(.267)         |                     |
| CinguloOperc-<br>lhMiddleFrontal              | -29        | 38         | 28        | 0.241        | 0.433         | 1.17     | -2.05       | 0.013(.243)  | 0.029(.228)         |                     |
| CinguloOperc-<br>rhMiddleCingulum             | 16         | -33        | 43        | 0.782        | 0.885         | 0.28     | -2.69       | -0.023(.159) | -0.026(.159)        |                     |
| <b>CinguloOperc-<br/>rhSupplementaryMotor</b> | <b>7</b>   | <b>5</b>   | <b>56</b> | <b>0.004</b> | <b>0.043*</b> | <b>-</b> | <b>2.91</b> | <b>1.44</b>  | <b>0.019(.212)</b>  | <b>0.055(.209)</b>  |
| CinguloOperc-<br>rhMiddleCingulum             | 9          | 4          | 40        | 0.366        | 0.561         | -0.9     | -2.33       | -0.006(.173) | -0.015(.162)        |                     |
| CinguloOperc-<br>rhMiddleCingulum             | 9          | 11         | 46        | 0.02         | 0.106         | 2.33     | -0.06       | 0.094(.237)  | 0.125(.229)         |                     |
| CinguloOperc-<br>rhMiddleCingulum             | 6          | 22         | 32        | 0.052        | 0.177         | 1.95     | -0.85       | 0.065(.208)  | 0.088(.199)         |                     |
| CinguloOperc-<br>rhSupplementaryMotor         | 16         | 1          | 68        | 0.328        | 0.527         | 0.98     | -2.25       | 0.046(.177)  | 0.056(.171)         |                     |
| CinguloOperc-<br>rhSupplementaryMotor         | 8          | -6         | 64        | 0.532        | 0.715         | 0.62     | -2.54       | -0.021(.161) | -0.026(.151)        |                     |

|                                       |           |           |           |          |               |             |             |                     |                     |
|---------------------------------------|-----------|-----------|-----------|----------|---------------|-------------|-------------|---------------------|---------------------|
| CinguloOperc-rhPrecentral             | 42        | -2        | 47        | 0.695    | 0.835         | 0.39        | -2.65       | 0.055(.226)         | 0.060(.210)         |
| CinguloOperc-rhSupraMarginal          | 58        | -40       | 35        | 0.093    | 0.249         | 1.68        | -1.34       | 0.107(.230)         | 0.129(.225)         |
| CinguloOperc-rhSupraMarginal          | 55        | -27       | 30        | 0.054    | 0.182         | 1.93        | -0.9        | -0.057(.182)        | -0.077(.182)        |
| CinguloOperc-rhInsula                 | 39        | -14       | -5        | 0.006    | 0.057         | 2.76        | 1.03        | -0.043(.180)        | -0.071(.175)        |
| CinguloOperc-rhInsula                 | 40        | 1         | -13       | 0.32     | 0.522         | -1          | -2.24       | -0.063(.207)        | -0.074(.192)        |
| CinguloOperc-rhInsula                 | 37        | 5         | 13        | 0.009    | 0.073         | 2.61        | 0.63        | -0.057(.201)        | -0.087(.194)        |
| CinguloOperc-rhInsula                 | 40        | 10        | -2        | 0.246    | 0.439         | 1.16        | -2.06       | 0.008(.187)         | 0.021(.181)         |
| CinguloOperc-rhInsula                 | 36        | 6         | 6         | 0.107    | 0.265         | 1.61        | -1.44       | -0.016(.190)        | -0.032(.171)        |
| CinguloOperc-rhInsula                 | 34        | 23        | 4         | 0.044    | 0.162         | 2.01        | -0.73       | 0.179(.290)         | 0.211(.274)         |
| CinguloOperc-rhInsula                 | 34        | 24        | 10        | 0.022    | 0.113         | 2.28        | -0.16       | 0.084(.248)         | 0.116(.240)         |
| CinguloOperc-rhOpercularRolandic      | 50        | 3         | 4         | 0.707    | 0.841         | 0.38        | -2.65       | -0.048(.197)        | -0.044(.182)        |
| CinguloOperc-rhSuperiorFrontal        | 24        | 51        | 24        | 0.208    | 0.405         | 1.26        | -1.95       | 0.028(.282)         | 0.047(.254)         |
| CinguloOperc-rhMiddleFrontal          | 31        | 40        | 26        | 0.108    | 0.265         | 1.61        | -1.45       | 0.089(.234)         | 0.110(.225)         |
| CinguloParietal-lhMiddleCingulum      | -6        | -26       | 28        | 0.311    | 0.515         | 1.01        | -2.22       | 0.031(.269)         | 0.046(.266)         |
| CinguloParietal-lhPrecuneus           | -13       | -65       | 32        | 0.483    | 0.677         | -0.7        | -2.48       | -0.003(.264)        | -0.013(.257)        |
| CinguloParietal-lhPrecuneus           | -11       | -73       | 43        | 0.538    | 0.717         | 0.62        | -2.54       | 0.046(.251)         | 0.055(.248)         |
| CinguloParietal-rhMiddleCingulum      | 8         | -27       | 28        | 0.061    | 0.188         | 1.88        | -0.99       | 0.017(.264)         | 0.045(.263)         |
| CinguloParietal-rhCuneus              | 16        | -70       | 40        | 0.942    | 0.975         | 0.07        | -2.73       | 0.043(.238)         | 0.042(.234)         |
| Default-lhPrecuneus                   | -11       | -52       | 36        | 0.968    | 0.979         | 0.04        | -2.74       | -0.012(.200)        | -0.013(.192)        |
| Default-lhSuperiorFrontal             | -12       | 27        | 57        | 0.888    | 0.953         | 0.14        | -2.72       | 0.008(.176)         | 0.006(.160)         |
| Default-lhAngular                     | -47       | -58       | 31        | 0.615    | 0.78          | -0.5        | -2.61       | 0.064(.204)         | 0.058(.202)         |
| Default-lhMedialSuperiorFrontal       | -6        | 42        | 35        | 0.99     | 0.997         | 0.01        | -2.73       | 0.016(.215)         | 0.016(.207)         |
| Default-lhMiddleCingulum              | -2        | -18       | 39        | 0.642    | 0.791         | 0.46        | -2.62       | -0.044(.203)        | -0.038(.204)        |
| Default-lhSuperiorFrontal             | -20       | 30        | 46        | 0.618    | 0.78          | 0.5         | -2.6        | 0.021(.175)         | 0.026(.174)         |
| Default-lhMiddleOccipital             | -39       | -74       | 38        | 0.951    | 0.976         | 0.06        | -2.72       | 0.042(.219)         | 0.041(.217)         |
| Default-lhOrbitalSuperiorFrontal      | -28       | 54        | 0         | 0.809    | 0.904         | 0.24        | -2.68       | 0.098(.398)         | 0.093(.381)         |
| Default-lhOrbitalMedialFrontal        | -6        | 55        | -11       | 0.238    | 0.429         | 1.18        | -2.01       | -0.130(.439)        | -0.159(.398)        |
| <b>Default-lhOrbitalMedialFrontal</b> | <b>-7</b> | <b>38</b> | <b>-9</b> | <b>0</b> | <b>0.001*</b> | <b>4.64</b> | <b>7.84</b> | <b>-0.094(.373)</b> | <b>-0.193(.359)</b> |
| Default-lhMiddleTemporal              | -63       | -29       | -7        | 0.639    | 0.791         | 0.47        | -2.6        | 0.006(.338)         | 0.015(.308)         |
| Default-lhMiddleTemporal              | -53       | -11       | -16       | 0.275    | 0.474         | 1.09        | -2.12       | -0.057(.235)        | -0.072(.228)        |

|                                       |            |           |            |              |               |             |             |                     |                     |
|---------------------------------------|------------|-----------|------------|--------------|---------------|-------------|-------------|---------------------|---------------------|
| Default-lhSuperiorFrontal             | -16        | 49        | 37         | 0.115        | 0.276         | 1.58        | -1.5        | -0.049(.202)        | -0.067(.188)        |
| Default-lhSuperiorFrontal             | -20        | 56        | 28         | 0.739        | 0.859         | 0.33        | -2.68       | -0.034(.247)        | -0.038(.226)        |
| Default-lhMedialSuperiorFrontal       | -6         | 55        | 18         | 0.058        | 0.187         | -1.9        | -0.94       | -0.090(.224)        | -0.114(.208)        |
| Default-lhSuperiorFrontal             | -16        | 65        | 14         | 0.05         | 0.173         | 1.96        | -0.8        | -0.012(.352)        | -0.050(.324)        |
| <b>Default-lhAnteriorCingulum</b>     | <b>-6</b>  | <b>45</b> | <b>6</b>   | <b>0.002</b> | <b>0.035*</b> | <b>-3.1</b> | <b>2</b>    | <b>-0.032(.240)</b> | <b>-0.072(.217)</b> |
| Default-lhMiddleFrontal               | -26        | 27        | 39         | 0.427        | 0.619         | 0.79        | -2.42       | 0.051(.248)         | 0.061(.221)         |
| Default-lhMiddleFrontal               | -29        | 17        | 51         | 0.105        | 0.265         | 1.62        | -1.44       | 0.104(.251)         | 0.126(.232)         |
| Default-lhMiddleFrontal               | -42        | 16        | 48         | 0.008        | 0.066         | 2.67        | 0.79        | 0.058(.225)         | 0.090(.209)         |
| Default-rhPrecuneus                   | 12         | -52       | 34         | 0.253        | 0.447         | 1.14        | -2.09       | 0.024(.202)         | 0.012(.192)         |
| Default-rhSupplementaryMotor          | 12         | 22        | 60         | 0.162        | 0.341         | -1.4        | -1.76       | 0.026(.165)         | 0.013(.157)         |
| <b>Default-rhAnteriorCingulum</b>     | <b>8</b>   | <b>44</b> | <b>6</b>   | <b>0</b>     | <b>0.019*</b> | <b>3.53</b> | <b>3.4</b>  | <b>0.005(.224)</b>  | <b>-0.039(.211)</b> |
| Default-rhMiddleCingulum              | 3          | -20       | 38         | 0.218        | 0.41          | 1.23        | -1.99       | -0.011(.218)        | -0.026(.221)        |
| Default-rhSuperiorFrontal             | 22         | 21        | 46         | 0.19         | 0.376         | 1.31        | -1.89       | 0.105(.219)         | 0.120(.200)         |
| Default-rhAngular                     | 49         | -53       | 29         | 0.343        | 0.537         | 0.95        | -2.3        | 0.090(.234)         | 0.078(.218)         |
| Default-rhMiddleTemporal              | 62         | -26       | -6         | 0.142        | 0.319         | 1.47        | -1.65       | 0.027(.280)         | 0.049(.254)         |
| Default-rhPrecuneus                   | 7          | -69       | 50         | 0.031        | 0.132         | 2.16        | -0.44       | 0.278(.391)         | 0.325(.370)         |
| Default-rhAngular                     | 46         | -67       | 36         | 0.738        | 0.859         | 0.33        | -2.67       | 0.078(.210)         | 0.074(.202)         |
| Default-rhOrbitalMedialFrontal        | 5          | 65        | -7         | 0.093        | 0.249         | 1.68        | -1.28       | 0.004(.497)         | -0.044(.453)        |
| <b>Default-rhOrbitalMedialFrontal</b> | <b>7</b>   | <b>48</b> | <b>-10</b> | <b>0.004</b> | <b>0.044*</b> | <b>2.88</b> | <b>1.39</b> | <b>-0.090(.461)</b> | <b>-0.159(.389)</b> |
| Default-rhMiddleTemporal              | 58         | -7        | -16        | 0.4          | 0.589         | 0.84        | -2.35       | -0.056(.239)        | -0.044(.233)        |
| Default-rhMiddleFrontal               | 21         | 33        | 42         | 0.444        | 0.64          | 0.77        | -2.44       | 0.023(.198)         | 0.031(.187)         |
| Default-rhSuperiorFrontal             | 21         | 43        | 35         | 0.942        | 0.975         | 0.07        | -2.72       | 0.016(.217)         | 0.015(.209)         |
| Default-rhSuperiorFrontal             | 16         | 61        | 20         | 0.248        | 0.44          | 1.16        | -2.04       | -0.009(.273)        | -0.027(.254)        |
| Default-rhMedialSuperiorFrontal       | 8          | 54        | 14         | 0.06         | 0.187         | 1.88        | -0.97       | -0.064(.234)        | -0.089(.218)        |
| Default-rhMedialSuperiorFrontal       | 6          | 55        | 29         | 0.018        | 0.1           | 2.37        | 0.06        | -0.062(.230)        | -0.093(.221)        |
| Default-rhSuperiorFrontal             | 14         | 47        | 42         | 0.137        | 0.319         | 1.49        | -1.63       | -0.037(.205)        | -0.054(.192)        |
| Default-rhMedialSuperiorFrontal       | 7          | 44        | 35         | 0.643        | 0.791         | 0.46        | -2.62       | 0.008(.204)         | 0.003(.193)         |
| Default-rhMiddleFrontal               | 31         | 19        | 49         | 0.1          | 0.26          | 1.64        | -1.4        | 0.124(.252)         | 0.148(.241)         |
| Default-rhSuperiorTemporal            | 54         | 1         | -13        | 0.048        | 0.168         | 1.98        | -0.77       | -0.039(.209)        | -0.063(.199)        |
| <b>DorsalAttn-lhPrecentral</b>        | <b>-27</b> | <b>-7</b> | <b>46</b>  | <b>0.005</b> | <b>0.052</b>  | <b>2.82</b> | <b>1.17</b> | <b>0.083(.229)</b>  | <b>0.119(.218)</b>  |

|                                            |            |            |           |              |               |             |             |                    |                    |
|--------------------------------------------|------------|------------|-----------|--------------|---------------|-------------|-------------|--------------------|--------------------|
| <b>DorsalAttn-<br/>lhMiddleFrontal</b>     | <b>-27</b> | <b>2</b>   | <b>53</b> | <b>0.001</b> | <b>0.021*</b> | <b>3.37</b> | <b>2.85</b> | <b>0.153(.247)</b> | <b>0.198(.228)</b> |
| DorsalAttn-<br>lhSuperiorFrontal           | -20        | 6          | 56        | 0.014        | 0.088         | 2.45        | 0.24        | 0.150(.248)        | 0.185(.240)        |
| <b>DorsalAttn-<br/>lhSuperiorFrontal</b>   | <b>-21</b> | <b>0</b>   | <b>63</b> | <b>0.001</b> | <b>0.03*</b>  | <b>3.19</b> | <b>2.29</b> | <b>0.057(.192)</b> | <b>0.092(.180)</b> |
| DorsalAttn-<br>lhInferiorParietal          | -31        | -49        | 47        | 0.018        | 0.1           | 2.36        | 0.02        | 0.105(.228)        | 0.137(.230)        |
| <b>DorsalAttn-<br/>lhInferiorParietal</b>  | <b>-43</b> | <b>-45</b> | <b>43</b> | <b>0</b>     | <b>0.008*</b> | <b>4.08</b> | <b>5.45</b> | <b>0.159(.270)</b> | <b>0.221(.259)</b> |
| DorsalAttn-<br>lhInferiorParietal          | -52        | -31        | 40        | 0.927        | 0.971         | -           | -2.72       | 0.023(.210)        | 0.022(.206)        |
| DorsalAttn-<br>lhTriangularInferiorFrontal | -44        | 36         | 8         | 0.933        | 0.972         | -           | -2.72       | -0.029(.260)       | -0.030(.255)       |
| DorsalAttn-<br>lhSuperiorParietal          | -20        | -65        | 51        | 0.046        | 0.165         | 2           | -0.76       | 0.068(.232)        | 0.095(.238)        |
| DorsalAttn-<br>lhMiddleOccipital           | -26        | -65        | 32        | 0.213        | 0.41          | 1.24        | -1.97       | 0.020(.221)        | 0.036(.225)        |
| DorsalAttn-lhPrecuneus                     | -10        | -57        | 60        | 0.135        | 0.318         | 1.5         | -1.63       | 0.053(.227)        | 0.071(.208)        |
| <b>DorsalAttn-lhPrecuneus</b>              | <b>-7</b>  | <b>-64</b> | <b>55</b> | <b>0.001</b> | <b>0.021*</b> | <b>3.34</b> | <b>2.76</b> | <b>0.225(.355)</b> | <b>0.289(.323)</b> |
| DorsalAttn-<br>lhMiddleOccipital           | -30        | -74        | 36        | 0.333        | 0.529         | 0.97        | -2.27       | 0.079(.266)        | 0.094(.263)        |
| DorsalAttn-<br>lhInferiorTemporal          | -46        | -58        | -8        | 0.746        | 0.861         | 0.32        | -2.67       | -0.059(.185)       | -0.056(.184)       |
| DorsalAttn-lhPrecentral                    | -45        | 3          | 32        | 0.024        | 0.117         | 2.27        | -0.21       | 0.053(.238)        | 0.083(.231)        |
| DorsalAttn-lhPrecentral                    | -35        | 6          | 34        | 0.057        | 0.187         | 1.9         | -0.94       | 0.066(.305)        | 0.100(.300)        |
| DorsalAttn-<br>lhMiddleFrontal             | -38        | 38         | 17        | 0.052        | 0.177         | 1.95        | -0.86       | 0.016(.289)        | 0.046(.267)        |
| DorsalAttn-<br>lhOpercularInferiorFrontal  | -42        | 9          | 22        | 0.22         | 0.41          | 1.23        | -1.97       | 0.049(.279)        | 0.068(.265)        |
| DorsalAttn-<br>lhMiddleFrontal             | -36        | 33         | 32        | 0.2          | 0.392         | 1.28        | -1.93       | 0.098(.257)        | 0.116(.250)        |
| DorsalAttn-rhPrecuneus                     | 10         | -57        | 58        | 0.009        | 0.072         | 2.63        | 0.68        | 0.106(.250)        | 0.142(.236)        |
| <b>DorsalAttn-<br/>rhMiddleFrontal</b>     | <b>29</b>  | <b>2</b>   | <b>52</b> | <b>0.001</b> | <b>0.03*</b>  | <b>3.19</b> | <b>2.27</b> | <b>0.155(.245)</b> | <b>0.199(.234)</b> |
| <b>DorsalAttn-rhPrecentral</b>             | <b>30</b>  | <b>-8</b>  | <b>47</b> | <b>0.003</b> | <b>0.042*</b> | <b>2.93</b> | <b>1.5</b>  | <b>0.082(.257)</b> | <b>0.122(.232)</b> |
| DorsalAttn-<br>rhSuperiorFrontal           | 23         | 6          | 58        | 0.058        | 0.187         | 1.89        | -0.97       | 0.189(.273)        | 0.216(.241)        |
| <b>DorsalAttn-<br/>rhInferiorParietal</b>  | <b>39</b>  | <b>-43</b> | <b>40</b> | <b>0.003</b> | <b>0.04*</b>  | <b>2.99</b> | <b>1.66</b> | <b>0.211(.314)</b> | <b>0.262(.298)</b> |
| DorsalAttn-<br>rhMiddleFrontal             | 37         | 38         | 13        | 0.673        | 0.82          | -           | -2.64       | 0.062(.257)        | 0.056(.244)        |
| DorsalAttn-<br>rhTriangularInferiorFrontal | 48         | 38         | 2         | 0.376        | 0.568         | -           | -2.33       | -0.037(.319)       | -0.053(.313)       |
| DorsalAttn-<br>rhSuperiorParietal          | 23         | -66        | 52        | 0.064        | 0.195         | 1.85        | -1.05       | 0.096(.261)        | 0.123(.252)        |
| DorsalAttn-<br>rhMiddleOccipital           | 32         | -64        | 34        | 0.773        | 0.883         | 0.29        | -2.69       | 0.059(.223)        | 0.063(.226)        |
| DorsalAttn-<br>rhInferiorParietal          | 34         | -48        | 49        | 0.22         | 0.41          | 1.23        | -2          | 0.140(.260)        | 0.158(.256)        |

|                                                  |            |            |           |              |               |             |             |                    |                    |
|--------------------------------------------------|------------|------------|-----------|--------------|---------------|-------------|-------------|--------------------|--------------------|
| DorsalAttn-rhMiddleTemporal                      | 57         | -54        | -1        | 0.488        | 0.679         | 0.69        | -2.49       | 0.040(.235)        | 0.030(.246)        |
| DorsalAttn-rhPrecentral                          | 47         | 2          | 38        | 0.315        | 0.519         | 1           | -2.23       | 0.042(.232)        | 0.057(.243)        |
| DorsalAttn-rhOpercularInferiorFrontal            | 47         | 8          | 19        | 0.507        | 0.695         | 0.66        | -2.51       | 0.066(.211)        | 0.074(.203)        |
| <b>FrontoParietal-lhMiddleFrontal</b>            | <b>-38</b> | <b>49</b>  | <b>10</b> | <b>0</b>     | <b>0.018*</b> | <b>3.58</b> | <b>3.58</b> | <b>0.076(.332)</b> | <b>0.145(.329)</b> |
| FrontoParietal-lhInferiorTemporal                | -56        | -48        | -9        | 0.14         | 0.319         | 1.48        | -1.64       | -0.033(.270)       | -0.011(.254)       |
| FrontoParietal-lhMedialSuperiorFrontal           | -6         | 29         | 44        | 0.028        | 0.127         | 2.21        | -0.33       | 0.105(.230)        | 0.133(.211)        |
| FrontoParietal-lhOrbitalMiddleFrontal            | -40        | 50         | -5        | 0.069        | 0.202         | 1.82        | -1.06       | 0.060(.390)        | 0.103(.384)        |
| FrontoParietal-lhAngular                         | -34        | -61        | 42        | 0.017        | 0.1           | 2.38        | 0.07        | 0.117(.284)        | 0.153(.263)        |
| <b>FrontoParietal-lhOpercularInferiorFrontal</b> | <b>-43</b> | <b>19</b>  | <b>34</b> | <b>0</b>     | <b>0.015*</b> | <b>3.66</b> | <b>3.87</b> | <b>0.114(.325)</b> | <b>0.182(.316)</b> |
| FrontoParietal-lhTriangularInferiorFrontal       | -40        | 24         | 23        | 0.018        | 0.1           | 2.36        | 0.03        | 0.036(.271)        | 0.073(.269)        |
| FrontoParietal-lhSuperiorFrontal                 | -21        | 63         | 2         | 0.873        | 0.946         | 0.16        | -2.69       | 0.065(.399)        | 0.062(.364)        |
| FrontoParietal-lhMiddleFrontal                   | -29        | 51         | 10        | 0.021        | 0.108         | 2.31        | -0.1        | 0.100(.334)        | 0.145(.332)        |
| <b>FrontoParietal-rhSupraMarginal</b>            | <b>48</b>  | <b>-42</b> | <b>42</b> | <b>0.004</b> | <b>0.044*</b> | <b>2.88</b> | <b>1.36</b> | <b>0.205(.278)</b> | <b>0.250(.268)</b> |
| FrontoParietal-rhMiddleFrontal                   | 38         | 46         | 8         | 0.919        | 0.97          | -0.1        | -2.72       | 0.085(.289)        | 0.083(.294)        |
| FrontoParietal-rhInferiorTemporal                | 60         | -41        | -11       | 0.187        | 0.374         | 1.32        | -1.86       | 0.048(.273)        | 0.069(.266)        |
| FrontoParietal-rhSupplementaryMotor              | 7          | 26         | 47        | 0.031        | 0.132         | 2.16        | -0.43       | 0.112(.233)        | 0.140(.220)        |
| FrontoParietal-rhOrbitalInferiorFrontal          | 43         | 48         | -5        | 0.9          | 0.957         | 0.13        | -2.67       | 0.101(.378)        | 0.104(.351)        |
| FrontoParietal-rhInferiorParietal                | 42         | -54        | 44        | 0.143        | 0.319         | 1.46        | -1.68       | 0.154(.314)        | 0.179(.288)        |
| FrontoParietal-rhAngular                         | 36         | -57        | 45        | 0.021        | 0.108         | 2.31        | -0.1        | 0.131(.309)        | 0.171(.300)        |
| FrontoParietal-rhMiddleFrontal                   | 38         | 29         | 36        | 0.056        | 0.186         | 1.91        | -0.93       | 0.162(.284)        | 0.192(.269)        |
| FrontoParietal-rhTriangularInferiorFrontal       | 42         | 29         | 22        | 0.933        | 0.972         | 0.08        | -2.73       | 0.044(.255)        | 0.043(.258)        |
| FrontoParietal-rhTriangularInferiorFrontal       | 39         | 19         | 26        | 0.421        | 0.612         | -0.8        | -2.41       | 0.042(.294)        | 0.029(.278)        |
| FrontoParietal-rhOrbitalSuperiorFrontal          | 28         | 57         | -5        | 0.797        | 0.894         | 0.26        | -2.67       | 0.101(.428)        | 0.095(.398)        |
| FrontoParietal-rhSuperiorFrontal                 | 24         | 59         | 5         | 0.278        | 0.474         | 1.09        | -2.12       | 0.088(.344)        | 0.067(.320)        |
| FrontoParietal-rhSuperiorFrontal                 | 31         | 52         | 10        | 0.854        | 0.934         | 0.18        | -2.7        | 0.114(.348)        | 0.117(.325)        |
| FrontoParietal-rhMiddleFrontal                   | 42         | 20         | 48        | 0.046        | 0.165         | 1.99        | -0.77       | 0.101(.239)        | 0.128(.222)        |
| FrontoParietal-rhMiddleFrontal                   | 39         | 10         | 43        | 0.966        | 0.979         | 0.04        | -2.73       | 0.092(.250)        | 0.092(.243)        |

|                                      |            |           |            |              |               |   |             |             |                     |                     |
|--------------------------------------|------------|-----------|------------|--------------|---------------|---|-------------|-------------|---------------------|---------------------|
| None-lhSuperiorPoleTemporal          | -29        | 5         | -27        | 0.685        | 0.829         | - | 0.41        | -2.61       | -0.062(.284)        | -0.068(.249)        |
| None-lhParaHippocampal               | -29        | -36       | -8         | 0.053        | 0.179         | - | 1.94        | -0.86       | -0.017(.159)        | -0.034(.154)        |
| None-lhLingual                       | -18        | -39       | -1         | 0.161        | 0.341         | - | -1.4        | -1.75       | -0.010(.213)        | -0.027(.201)        |
| None-lhMiddlePoleTemporal            | -34        | 17        | -32        | 0.069        | 0.202         | - | 1.82        | -1.06       | -0.054(.238)        | -0.078(.210)        |
| None-lhOrbitalSuperiorFrontal        | -23        | 61        | -7         | 0.921        | 0.97          | - | 0.1         | -2.67       | 0.068(.560)         | 0.071(.557)         |
| None-lhAmygdala                      | -32        | 3         | -17        | 0.01         | 0.074         | - | 2.57        | 0.54        | -0.054(.315)        | -0.103(.325)        |
| <b>None-lhOrbitalInferiorFrontal</b> | <b>-35</b> | <b>36</b> | <b>-10</b> | <b>0.002</b> | <b>0.037*</b> | - | <b>3.06</b> | <b>1.9</b>  | <b>-0.156(.368)</b> | <b>-0.219(.344)</b> |
| None-lhOrbitalMiddleFrontal          | -22        | 32        | -14        | 0.273        | 0.474         | - | -1.1        | -2.12       | -0.048(.291)        | -0.065(.264)        |
| None-lhOrbitalSuperiorFrontal        | -24        | 52        | -13        | 0.282        | 0.479         | - | 1.08        | -2.1        | 0.099(.506)         | 0.130(.469)         |
| None-lhOrbitalSuperiorFrontal        | -17        | 47        | -18        | 0.173        | 0.358         | - | 1.36        | -1.77       | 0.035(.632)         | 0.082(.559)         |
| None-lhOrbitalSuperiorFrontal        | -13        | 24        | -16        | 0.57         | 0.743         | - | 0.57        | -2.55       | 0.053(.613)         | 0.035(.545)         |
| None-lhRectus                        | -9         | 46        | -21        | 0.364        | 0.561         | - | 0.91        | -2.3        | 0.046(1.449)        | -0.025(1.282)       |
| None-lhRectus                        | -2         | 34        | -26        | 0.736        | 0.859         | - | 0.34        | -2.65       | 0.044(1.759)        | -0.078(1.641)       |
| None-lhInferiorTemporal              | -53        | -13       | -29        | 0.144        | 0.319         | - | 1.46        | -1.65       | -0.003(.583)        | -0.051(.535)        |
| <b>None-lhInferiorTemporal</b>       | <b>-45</b> | <b>9</b>  | <b>-37</b> | <b>0.003</b> | <b>0.04*</b>  | - | <b>3.01</b> | <b>1.75</b> | <b>-0.062(.216)</b> | <b>-0.099(.206)</b> |
| None-lhInferiorTemporal              | -55        | -40       | -16        | 0.238        | 0.429         | - | 1.18        | -2.01       | 0.025(.343)         | 0.049(.340)         |
| None-lhFusiform                      | -32        | -4        | -45        | 0.393        | 0.581         | - | 0.85        | -2.33       | -0.058(.429)        | -0.079(.412)        |
| None-lhInferiorTemporal              | -39        | -13       | -27        | 0.717        | 0.844         | - | 0.36        | -2.63       | -0.062(.288)        | -0.068(.265)        |
| None-lhParaHippocampal               | -20        | -13       | -24        | 0.1          | 0.26          | - | 1.65        | -1.38       | -0.025(.301)        | -0.052(.276)        |
| None-lhParaHippocampal               | -22        | -22       | -17        | 0.027        | 0.127         | - | 2.21        | -0.31       | -0.028(.269)        | -0.061(.249)        |
| <b>None-lhSuperiorPoleTemporal</b>   | <b>-51</b> | <b>7</b>  | <b>-20</b> | <b>0</b>     | <b>0.015*</b> | - | <b>3.68</b> | <b>3.94</b> | <b>-0.034(.204)</b> | <b>-0.075(.185)</b> |
| None-rhSuperiorPoleTemporal          | 32         | 14        | -30        | 0.372        | 0.566         | - | 0.89        | -2.3        | -0.041(.232)        | -0.053(.224)        |
| None-rhParaHippocampal               | 25         | -36       | -5         | 0.236        | 0.429         | - | 1.18        | -2.03       | -0.002(.172)        | -0.013(.171)        |
| None-rhParaHippocampal               | 19         | -30       | -10        | 0.7          | 0.839         | - | 0.38        | -2.64       | -0.045(.361)        | -0.053(.352)        |
| None-rhRectus                        | 3          | 19        | -23        | 0.059        | 0.187         | - | 1.89        | -0.96       | 0.047(.798)         | -0.035(.720)        |
| None-rhOrbitalInferiorFrontal        | 35         | 37        | -8         | 0.075        | 0.217         | - | 1.78        | -1.15       | -0.118(.321)        | -0.149(.299)        |

|                                          |            |            |            |              |               |   |             |             |                     |                     |
|------------------------------------------|------------|------------|------------|--------------|---------------|---|-------------|-------------|---------------------|---------------------|
| None-rhOlfactory                         | 25         | 9          | -16        | 0.076        | 0.218         | - | 1.77        | -1.16       | -0.046(.332)        | -0.079(.309)        |
| None-rhOrbitalSuperiorFrontal            | 21         | 30         | -15        | 0.171        | 0.357         | - | 1.37        | -1.77       | -0.026(.286)        | -0.049(.272)        |
| None-rhOrbitalSuperiorFrontal            | 22         | 51         | -14        | 0.793        | 0.894         | - | 0.26        | -2.66       | 0.170(.511)         | 0.162(.491)         |
| None-rhOrbitalSuperiorFrontal            | 12         | 26         | -25        | 0.856        | 0.934         | - | 0.18        | -2.7        | 0.012(1.297)        | -0.002(1.218)       |
| None-rhRectus                            | 14         | 20         | -15        | 0.781        | 0.885         | - | 0.28        | -2.66       | 0.078(.408)         | 0.072(.384)         |
| None-rhRectus                            | 11         | 39         | -20        | 0.285        | 0.483         | - | 1.07        | -2.14       | 0.069(.999)         | 0.011(.893)         |
| None-lhRectus                            | 2          | 39         | -26        | 0.607        | 0.78          | - | 0.51        | -2.57       | 0.006(1.521)        | -0.041(1.554)       |
| None-rhInferiorTemporal                  | 62         | -26        | -16        | 0.713        | 0.843         | - | 0.37        | -2.63       | 0.122(.525)         | 0.133(.458)         |
| None-rhInferiorTemporal                  | 55         | -8         | -27        | 0.638        | 0.791         | - | 0.47        | -2.59       | -0.050(.426)        | -0.062(.411)        |
| None-rhMiddlePoleTemporal                | 45         | 14         | -30        | 0.238        | 0.429         | - | 1.18        | -2.01       | -0.067(.184)        | -0.080(.179)        |
| None-rhParaHippocampal                   | 20         | -21        | -22        | 0.01         | 0.074         | - | 2.57        | 0.54        | -0.001(.298)        | -0.043(.267)        |
| None-rhFusiform                          | 28         | 0          | -37        | 0.093        | 0.249         | - | 1.68        | -1.28       | -0.024(.563)        | -0.076(.494)        |
| None-rhInferiorTemporal                  | 37         | 8          | -38        | 0.026        | 0.126         | - | 2.23        | -0.26       | -0.048(.288)        | -0.084(.267)        |
| None-rhInferiorTemporal                  | 54         | -10        | -37        | 0.014        | 0.088         | - | 2.46        | 0.31        | 0.029(.480)         | -0.045(.485)        |
| None-rhInferiorTemporal                  | 56         | -27        | -19        | 0.299        | 0.499         | - | 1.04        | -2.16       | 0.048(.732)         | 0.093(.719)         |
| None-rhFusiform                          | 31         | 2          | -46        | 0.102        | 0.262         | - | 1.64        | -1.38       | -0.014(.524)        | -0.061(.472)        |
| None-rhFusiform                          | 40         | -12        | -30        | 0.956        | 0.976         | - | 0.05        | -2.69       | -0.063(.313)        | -0.062(.296)        |
| None-rhFusiform                          | 32         | -9         | -36        | 0.897        | 0.957         | - | 0.13        | -2.66       | -0.022(.414)        | -0.025(.389)        |
| None-rhInferiorTemporal                  | 43         | -24        | -21        | 0.034        | 0.137         | - | 2.12        | -0.47       | -0.028(.372)        | -0.077(.379)        |
| <b>None-rhParaHippocampal</b>            | <b>20</b>  | <b>-11</b> | <b>-25</b> | <b>0.002</b> | <b>0.031*</b> | - | <b>3.17</b> | <b>2.23</b> | <b>-0.016(.299)</b> | <b>-0.067(.265)</b> |
| <b>None-rhParaHippocampal</b>            | <b>30</b>  | <b>-19</b> | <b>-19</b> | <b>0</b>     | <b>0.009*</b> | - | <b>3.96</b> | <b>5</b>    | <b>-0.010(.268)</b> | <b>-0.071(.259)</b> |
| <b>RetrosplenialTemporal-lhCalcarine</b> | <b>-14</b> | <b>-58</b> | <b>18</b>  | <b>0</b>     | <b>0.019*</b> | - | <b>3.49</b> | <b>3.27</b> | <b>-0.083(.239)</b> | <b>-0.128(.222)</b> |
| <b>RetrosplenialTemporal-lhLingual</b>   | <b>-9</b>  | <b>-50</b> | <b>4</b>   | <b>0.001</b> | <b>0.019*</b> | - | <b>3.46</b> | <b>3.17</b> | <b>-0.088(.257)</b> | <b>-0.139(.253)</b> |
| RetrosplenialTemporal-lhFusiform         | -34        | -33        | -15        | 0.007        | 0.062         | - | 2.71        | 0.9         | -0.090(.196)        | -0.120(.191)        |
| RetrosplenialTemporal-lhFusiform         | -22        | -37        | -15        | 0.039        | 0.151         | - | 2.06        | -0.63       | -0.085(.226)        | -0.110(.205)        |
| RetrosplenialTemporal-rhCalcarine        | 14         | -54        | 11         | 0.006        | 0.055         | - | 2.78        | 1.08        | -0.058(.225)        | -0.094(.222)        |
| RetrosplenialTemporal-rhFusiform         | 35         | -36        | -12        | 0.091        | 0.249         | - | 1.69        | -1.32       | -0.093(.233)        | -0.114(.220)        |

|                                  |     |     |     |       |       |      |       |             |              |              |
|----------------------------------|-----|-----|-----|-------|-------|------|-------|-------------|--------------|--------------|
| RetrosplenialTemporal-rhFusiform | 35  | -24 | -20 | 0.037 | 0.146 | -    | 2.09  | -0.57       | -0.057(.235) | -0.085(.224) |
| RetrosplenialTemporal-rhFusiform | 24  | -36 | -13 | 0.046 | 0.165 | -    | -2    | -0.76       | -0.076(.233) | -0.102(.220) |
| SaliencelhlAnteriorCingulum      | -10 | 34  | 22  | 0.488 | 0.679 | 0.69 | -2.5  | 0.071(.238) | 0.080(.224)  |              |
| SaliencelhlInsula                | -32 | 17  | -8  | 0.214 | 0.41  | 1.24 | -1.97 | 0.096(.276) | 0.115(.270)  |              |
| SaliencelrhAnteriorCingulum      | 8   | 35  | 23  | 0.446 | 0.641 | 0.76 | -2.44 | 0.094(.254) | 0.084(.233)  |              |
| SaliencelrhInsula                | 31  | 23  | -5  | 0.349 | 0.544 | 0.94 | -2.3  | 0.152(.315) | 0.169(.297)  |              |
| SMhand-lhSuperiorParietal        | -19 | -49 | 65  | 0.492 | 0.683 | -    | 0.69  | -2.49       | -0.051(.158) | -0.057(.156) |
| SMhand-lhPrecuneus               | -11 | -48 | 60  | 0.107 | 0.265 | -    | 1.61  | -1.43       | -0.045(.218) | -0.064(.199) |
| SMhand-lhLobuleParacentral       | -16 | -33 | 66  | 0.141 | 0.319 | -    | 1.47  | -1.66       | -0.097(.231) | -0.116(.223) |
| SMhand-lhLobuleParacentral       | -11 | -29 | 70  | 0.091 | 0.249 | -    | 1.69  | -1.31       | -0.042(.154) | -0.058(.153) |
| SMhand-lhLobuleParacentral       | -7  | -20 | 74  | 0.693 | 0.835 | -    | -0.4  | -2.62       | -0.034(.202) | -0.039(.209) |
| SMhand-lhPrecuneus               | -11 | -41 | 65  | 0.158 | 0.341 | -    | 1.41  | -1.74       | -0.035(.190) | -0.050(.177) |
| SMhand-lhLobuleParacentral       | -5  | -28 | 60  | 0.042 | 0.157 | -    | 2.03  | -0.69       | -0.038(.175) | -0.058(.164) |
| SMhand-lhMiddleCingulum          | -5  | -16 | 49  | 0.226 | 0.42  | -    | 1.21  | -2          | -0.069(.203) | -0.083(.191) |
| SMhand-lhPostcentral             | -36 | -30 | 54  | 0.098 | 0.26  | -    | 1.66  | -1.38       | -0.067(.240) | -0.090(.247) |
| SMhand-lhPrecentral              | -37 | -23 | 62  | 0.031 | 0.132 | -    | 2.16  | -0.42       | -0.033(.166) | -0.054(.168) |
| SMhand-lhPrecentral              | -20 | -25 | 64  | 0.181 | 0.367 | -    | 1.34  | -1.83       | -0.042(.163) | -0.054(.164) |
| SMhand-lhPrecentral              | -23 | -14 | 64  | 0.51  | 0.695 | -    | 0.66  | -2.51       | -0.026(.154) | -0.032(.151) |
| SMhand-lhLobuleParacentral       | -17 | -9  | 68  | 0.303 | 0.503 | -    | 1.03  | -2.19       | -0.016(.146) | -0.024(.136) |
| SMhand-lhSuperiorParietal        | -29 | -45 | 62  | 0.143 | 0.319 | -    | 1.46  | -1.66       | -0.054(.172) | -0.069(.176) |
| SMhand-lhInferiorParietal        | -54 | -21 | 41  | 0.474 | 0.673 | -    | 0.72  | -2.47       | -0.055(.211) | -0.063(.194) |
| SMhand-lhPostcentral             | -35 | -35 | 42  | 0.618 | 0.78  | -    | 0.5   | -2.62       | -0.006(.215) | 0.000(.207)  |
| SMhand-lhPostcentral             | -28 | -37 | 61  | 0.182 | 0.367 | -    | 1.33  | -1.84       | -0.038(.154) | -0.050(.153) |
| SMhand-lhPostcentral             | -47 | -31 | 55  | 0.18  | 0.367 | -    | 1.34  | -1.83       | -0.024(.200) | -0.039(.194) |
| SMhand-rhSuperiorParietal        | 21  | -48 | 66  | 0.034 | 0.137 | -    | 2.12  | -0.5        | -0.039(.156) | -0.059(.163) |
| SMhand-rhPostcentral             | 16  | -33 | 68  | 0.067 | 0.199 | -    | 1.83  | -1.07       | -0.091(.243) | -0.116(.242) |
| SMhand-rhLobuleParacentral       | 5   | -27 | 65  | 0.031 | 0.132 | -    | 2.16  | -0.41       | -0.035(.187) | -0.057(.170) |

|                             |           |            |           |              |              |   |             |             |                     |                     |
|-----------------------------|-----------|------------|-----------|--------------|--------------|---|-------------|-------------|---------------------|---------------------|
| SMhand-rhPostcentral        | 12        | -41        | 67        | 0.007        | 0.062        | - | 2.71        | 0.89        | -0.025(.174)        | -0.053(.177)        |
| SMhand-rhSupplementaryMotor | 5         | -17        | 52        | 0.042        | 0.157        | - | 2.03        | -0.68       | -0.055(.216)        | -0.080(.206)        |
| SMhand-rhMiddleCingulum     | 7         | -8         | 51        | 0.011        | 0.078        | - | 2.54        | 0.45        | -0.057(.189)        | -0.085(.186)        |
| SMhand-rhPrecentral         | 38        | -22        | 60        | 0.22         | 0.41         | - | 1.23        | -1.97       | -0.048(.154)        | -0.059(.152)        |
| SMhand-rhPrecentral         | 20        | -25        | 65        | 0.334        | 0.529        | - | 0.97        | -2.25       | -0.048(.166)        | -0.057(.160)        |
| SMhand-rhPrecentral         | 12        | -28        | 70        | 0.012        | 0.079        | - | 2.52        | 0.41        | -0.029(.156)        | -0.053(.159)        |
| SMhand-rhPrecentral         | 29        | -14        | 64        | 0.962        | 0.979        | - | 0.05        | -2.73       | -0.047(.176)        | -0.047(.183)        |
| SMhand-rhPrecentral         | 17        | -17        | 71        | 0.846        | 0.934        | - | 0.19        | -2.68       | -0.055(.159)        | -0.057(.151)        |
| SMhand-rhSuperiorFrontal    | 21        | -6         | 65        | 0.713        | 0.843        | - | 0.37        | -2.66       | 0.014(.164)         | 0.011(.159)         |
| <b>SMhand-rhPostcentral</b> | <b>30</b> | <b>-42</b> | <b>60</b> | <b>0.003</b> | <b>0.04*</b> | - | <b>2.98</b> | <b>1.63</b> | <b>-0.053(.204)</b> | <b>-0.086(.189)</b> |
| SMhand-rhInferiorParietal   | 34        | -41        | 52        | 0.562        | 0.735        | - | 0.58        | -2.56       | 0.002(.242)         | -0.006(.247)        |
| SMhand-rhSupraMarginal      | 40        | -32        | 40        | 0.508        | 0.695        | - | 0.66        | -2.52       | 0.020(.217)         | 0.012(.211)         |
| SMhand-rhPostcentral        | 28        | -35        | 63        | 0.013        | 0.086        | - | 2.48        | 0.31        | -0.027(.156)        | -0.049(.150)        |
| SMhand-rhPostcentral        | 39        | -35        | 58        | 0.756        | 0.867        | - | 0.31        | -2.68       | -0.041(.196)        | -0.044(.180)        |
| SMhand-rhPostcentral        | 37        | -26        | 51        | 0.1          | 0.26         | - | 1.65        | -1.39       | -0.085(.240)        | -0.106(.224)        |
| SMhand-rhPostcentral        | 49        | -26        | 52        | 0.198        | 0.39         | - | 1.29        | -1.91       | -0.041(.194)        | -0.055(.192)        |
| SMhand-rhSupraMarginal      | 53        | -23        | 39        | 0.752        | 0.865        | - | 0.32        | -2.68       | -0.044(.204)        | -0.047(.197)        |
| SMmouth-lhPostcentral       | -52       | -8         | 38        | 0.39         | 0.581        | - | 0.86        | -2.36       | -0.055(.191)        | -0.064(.172)        |
| SMmouth-lhPostcentral       | -42       | -12        | 50        | 0.027        | 0.127        | - | 2.21        | -0.3        | -0.016(.191)        | -0.039(.171)        |
| SMmouth-lhPostcentral       | -52       | -12        | 30        | 0.019        | 0.101        | - | 2.35        | -0.02       | -0.072(.274)        | -0.106(.251)        |
| SMmouth-lhPostcentral       | -46       | -18        | 53        | 0.024        | 0.118        | - | 2.26        | -0.21       | -0.059(.245)        | -0.092(.253)        |
| SMmouth-rhPostcentral       | 50        | -7         | 36        | 0.014        | 0.088        | - | 2.46        | 0.25        | -0.046(.194)        | -0.073(.183)        |
| SMmouth-rhPrecentral        | 42        | -11        | 47        | 0.333        | 0.529        | - | 0.97        | -2.26       | -0.040(.170)        | -0.049(.171)        |
| SMmouth-rhPostcentral       | 54        | -8         | 26        | 0.122        | 0.291        | - | 1.55        | -1.56       | -0.087(.260)        | -0.109(.247)        |
| SMmouth-rhPrecentral        | 48        | -15        | 49        | 0.141        | 0.319        | - | 1.47        | -1.65       | -0.098(.249)        | -0.118(.227)        |
| Subcortical-lhCerebellum    | NA        | NA         | NA        | 0.608        | 0.78         | - | 0.51        | -2.62       | 0.074(.274)         | 0.066(.254)         |

|                                         |           |           |           |              |               |             |             |                     |                     |
|-----------------------------------------|-----------|-----------|-----------|--------------|---------------|-------------|-------------|---------------------|---------------------|
| Subcortical-lhThalamus                  | NA        | NA        | NA        | 0.386        | 0.58          | 0.87        | -2.4        | 0.023(.137)         | 0.029(.130)         |
| Subcortical-lhCaudate                   | NA        | NA        | NA        | 0.85         | 0.934         | 0.19        | -2.76       | 0.034(.208)         | 0.036(.198)         |
| Subcortical-lhPutamen                   | NA        | NA        | NA        | 0.171        | 0.357         | 1.37        | -1.85       | -0.009(.175)        | -0.021(.164)        |
| Subcortical-lhPallidum                  | NA        | NA        | NA        | 0.574        | 0.745         | 0.56        | -2.59       | 0.011(.130)         | 0.007(.133)         |
| Subcortical-brainStem                   | NA        | NA        | NA        | 0.357        | 0.554         | 0.92        | -2.33       | 0.042(.162)         | 0.033(.159)         |
| <b>Subcortical-lhHippocampus</b>        | <b>NA</b> | <b>NA</b> | <b>NA</b> | <b>0.003</b> | <b>0.04*</b>  | <b>2.99</b> | <b>1.64</b> | <b>-0.052(.153)</b> | <b>-0.077(.153)</b> |
| Subcortical-lhAmygdala                  | NA        | NA        | NA        | 0.065        | 0.196         | 1.85        | -1.08       | -0.053(.198)        | -0.072(.188)        |
| <b>Subcortical-lhAccumbens</b>          | <b>NA</b> | <b>NA</b> | <b>NA</b> | <b>0.002</b> | <b>0.038*</b> | <b>3.04</b> | <b>1.81</b> | <b>-0.007(.217)</b> | <b>-0.044(.209)</b> |
| Subcortical-lhVentraldc                 | NA        | NA        | NA        | 0.997        | 0.997         | 0           | -2.76       | 0.032(.173)         | 0.033(.167)         |
| Subcortical-rhCerebellum                | NA        | NA        | NA        | 0.098        | 0.26          | 1.65        | -1.4        | 0.036(.261)         | 0.060(.254)         |
| Subcortical-rhThalamus                  | NA        | NA        | NA        | 0.274        | 0.474         | 1.09        | -2.18       | 0.032(.154)         | 0.041(.142)         |
| Subcortical-rhCaudate                   | NA        | NA        | NA        | 0.635        | 0.791         | 0.47        | -2.66       | 0.030(.206)         | 0.035(.199)         |
| Subcortical-rhPutamen                   | NA        | NA        | NA        | 0.215        | 0.41          | 1.24        | -2.01       | -0.010(.175)        | -0.021(.165)        |
| Subcortical-rhPallidum                  | NA        | NA        | NA        | 0.062        | 0.19          | 1.87        | -1.03       | 0.038(.146)         | 0.023(.135)         |
| <b>Subcortical-rhHippocampus</b>        | <b>NA</b> | <b>NA</b> | <b>NA</b> | <b>0.001</b> | <b>0.021*</b> | <b>3.37</b> | <b>2.85</b> | <b>-0.040(.156)</b> | <b>-0.069(.153)</b> |
| Subcortical-rhAmygdala                  | NA        | NA        | NA        | 0.037        | 0.147         | 2.09        | -0.61       | -0.042(.212)        | -0.065(.193)        |
| Subcortical-rhAccumbens                 | NA        | NA        | NA        | 0.01         | 0.074         | 2.59        | 0.56        | -0.001(.199)        | -0.029(.187)        |
| Subcortical-rhVentraldc                 | NA        | NA        | NA        | 0.336        | 0.53          | 0.96        | -2.31       | 0.031(.177)         | 0.040(.161)         |
| VentralAttn-lhSupplementaryMotor        | -4        | 12        | 65        | 0.032        | 0.132         | 2.15        | -0.44       | 0.054(.184)         | 0.075(.165)         |
| VentralAttn-lhMiddleTemporal            | -45       | -54       | 15        | 0.16         | 0.341         | 1.41        | -1.75       | 0.024(.238)         | 0.043(.230)         |
| VentralAttn-lhMiddleTemporal            | -52       | -56       | 11        | 0.542        | 0.717         | 0.61        | -2.54       | -0.000(.231)        | 0.008(.222)         |
| VentralAttn-lhMiddleTemporal            | -48       | -40       | 2         | 0.957        | 0.976         | 0.05        | -2.73       | -0.017(.178)        | -0.016(.173)        |
| VentralAttn-lhTriangularInferiorFrontal | -50       | 21        | 11        | 0.86         | 0.934         | 0.18        | -2.71       | -0.008(.246)        | -0.005(.237)        |
| VentralAttn-lhOrbitalInferiorFrontal    | -47       | 39        | -9        | 0.106        | 0.265         | 1.62        | -1.42       | 0.008(.371)         | -0.026(.348)        |
| VentralAttn-lhInsula                    | -29       | 20        | -14       | 0.611        | 0.78          | 0.51        | -2.58       | -0.052(.211)        | -0.058(.205)        |
| VentralAttn-lhOrbitalInferiorFrontal    | -44       | 33        | -7        | 0.14         | 0.319         | 1.48        | -1.64       | -0.054(.274)        | -0.078(.271)        |
| VentralAttn-lhTriangularInferiorFrontal | -45       | 29        | 1         | 0.797        | 0.894         | 0.26        | -2.68       | -0.102(.269)        | -0.098(.254)        |
| VentralAttn-lhPrecentral                | -39       | 5         | 48        | 0.008        | 0.068         | 2.66        | 0.74        | 0.083(.244)         | 0.118(.226)         |
| VentralAttn-lhMiddleTemporal            | -59       | -18       | -3        | 0.181        | 0.367         | 1.34        | -1.84       | -0.044(.220)        | -0.060(.208)        |

|                                         |     |     |     |       |       |   |      |       |              |              |
|-----------------------------------------|-----|-----|-----|-------|-------|---|------|-------|--------------|--------------|
| VentralAttn-rhMiddleTemporal            | 58  | -45 | 9   | 0.995 | 0.997 | - | 0.01 | -2.72 | -0.011(.213) | -0.011(.199) |
| VentralAttn-rhMiddleTemporal            | 61  | -39 | 2   | 0.499 | 0.689 | - | 0.68 | -2.49 | 0.008(.236)  | -0.000(.224) |
| VentralAttn-rhSuperiorTemporal          | 57  | -17 | -3  | 0.411 | 0.603 | - | 0.82 | -2.38 | -0.045(.198) | -0.055(.190) |
| VentralAttn-rhSuperiorTemporal          | 47  | -40 | 13  | 0.856 | 0.934 | - | 0.18 | -2.71 | -0.016(.210) | -0.018(.196) |
| VentralAttn-rhMiddleTemporal            | 46  | -37 | 3   | 0.085 | 0.238 | - | 1.73 | -1.25 | -0.012(.179) | -0.030(.183) |
| VentralAttn-rhSuperiorTemporal          | 48  | -26 | 0   | 0.909 | 0.963 | - | 0.11 | -2.72 | -0.037(.188) | -0.038(.182) |
| VentralAttn-rhTriangularInferiorFrontal | 52  | 24  | 10  | 0.16  | 0.341 | - | -1.4 | -1.75 | 0.013(.268)  | -0.009(.272) |
| VentralAttn-rhOrbitalInferiorFrontal    | 48  | 38  | -9  | 0.105 | 0.265 | - | 1.62 | -1.4  | 0.003(.341)  | -0.029(.327) |
| VentralAttn-rhOrbitalInferiorFrontal    | 45  | 31  | -6  | 0.012 | 0.079 | - | 2.52 | 0.41  | -0.044(.237) | -0.079(.241) |
| VentralAttn-rhInsula                    | 27  | 20  | -15 | 0.188 | 0.374 | - | 1.32 | -1.85 | -0.005(.232) | -0.023(.220) |
| VentralAttn-rhSuperiorTemporal          | 57  | -6  | -8  | 0.112 | 0.272 | - | 1.59 | -1.47 | -0.049(.204) | -0.066(.185) |
| VentralAttn-rhMiddleTemporal            | 47  | -22 | -8  | 0.273 | 0.474 | - | -1.1 | -2.13 | -0.007(.234) | -0.022(.234) |
| Visual-lhSuperiorOccipital              | -18 | -86 | 22  | 0.848 | 0.934 | - | 0.19 | -2.7  | -0.016(.208) | -0.013(.212) |
| Visual-lhLingual                        | -17 | -60 | -5  | 0.512 | 0.695 | - | 0.66 | -2.53 | 0.033(.248)  | 0.024(.239)  |
| Visual-lhCalcarine                      | -11 | -83 | 4   | 0.722 | 0.847 | - | 0.36 | -2.67 | 0.099(.334)  | 0.106(.318)  |
| Visual-lhLingual                        | -22 | -58 | 2   | 0.54  | 0.717 | - | 0.61 | -2.54 | 0.044(.339)  | 0.056(.338)  |
| Visual-lhLingual                        | -10 | -58 | 3   | 0.059 | 0.187 | - | 1.89 | -0.96 | -0.027(.520) | -0.081(.476) |
| Visual-lhLingual                        | -17 | -46 | -4  | 0.276 | 0.474 | - | 1.09 | -2.15 | 0.014(.298)  | -0.005(.291) |
| Visual-lhSuperiorOccipital              | -14 | -77 | 27  | 0.954 | 0.976 | - | 0.06 | -2.72 | -0.028(.205) | -0.027(.199) |
| Visual-lhMiddleOccipital                | -31 | -84 | 9   | 0.925 | 0.971 | - | 0.09 | -2.71 | -0.044(.219) | -0.045(.238) |
| Visual-lhMiddleOccipital                | -34 | -87 | 0   | 0.546 | 0.719 | - | 0.6  | -2.53 | -0.057(.279) | -0.048(.260) |
| Visual-lhMiddleOccipital                | -43 | -68 | 10  | 0.18  | 0.367 | - | 1.34 | -1.85 | -0.027(.192) | -0.041(.181) |
| Visual-lhFusiform                       | -29 | -59 | -9  | 0.109 | 0.265 | - | 1.61 | -1.46 | -0.020(.217) | -0.041(.222) |
| Visual-lhFusiform                       | -34 | -64 | -16 | 0.287 | 0.484 | - | 1.06 | -2.16 | -0.010(.305) | 0.008(.291)  |
| Visual-lhFusiform                       | -34 | -44 | -22 | 0.524 | 0.706 | - | 0.64 | -2.51 | -0.018(.271) | -0.028(.248) |
| Visual-lhCuneus                         | -5  | -88 | 19  | 0.393 | 0.581 | - | 0.85 | -2.37 | 0.033(.239)  | 0.022(.228)  |
| Visual-lhLingual                        | -9  | -78 | -4  | 0.476 | 0.673 | - | 0.71 | -2.47 | 0.101(.288)  | 0.089(.304)  |
| Visual-lhInferiorOccipital              | -41 | -72 | -6  | 0.859 | 0.934 | - | 0.18 | -2.71 | -0.068(.235) | -0.070(.230) |
| Visual-lhInferiorOccipital              | -25 | -97 | -8  | 0.296 | 0.497 | - | 1.04 | -2.15 | -0.066(.439) | -0.039(.427) |

|                            |     |     |     |       |       |   |      |       |              |              |
|----------------------------|-----|-----|-----|-------|-------|---|------|-------|--------------|--------------|
| Visual-lhLingual           | -23 | -82 | -12 | 0.16  | 0.341 | - | 1.41 | -1.74 | 0.084(.285)  | 0.060(.280)  |
| Visual-rhSuperiorOccipital | 22  | -85 | 24  | 0.677 | 0.821 | - | 0.42 | -2.64 | -0.032(.219) | -0.038(.226) |
| Visual-rhFusiform          | 22  | -46 | -10 | 0.322 | 0.522 | - | 0.99 | -2.24 | -0.031(.218) | -0.044(.220) |
| Visual-rhCalcarine         | 16  | -74 | 9   | 0.894 | 0.956 | - | 0.13 | -2.73 | 0.060(.320)  | 0.062(.311)  |
| Visual-rhLingual           | 20  | -45 | -4  | 0.083 | 0.235 | - | 1.74 | -1.25 | 0.010(.292)  | -0.020(.294) |
| Visual-rhLingual           | 16  | -60 | -5  | 0.854 | 0.934 | - | 0.18 | -2.71 | 0.020(.245)  | 0.023(.249)  |
| Visual-rhInferiorParietal  | 27  | -55 | 54  | 0.144 | 0.319 | - | 1.46 | -1.68 | 0.026(.223)  | 0.045(.224)  |
| Visual-rhCuneus            | 18  | -78 | 34  | 0.113 | 0.273 | - | 1.58 | -1.49 | -0.017(.200) | -0.036(.205) |
| Visual-rhCuneus            | 8   | -86 | 32  | 0.031 | 0.132 | - | 2.16 | -0.4  | 0.011(.259)  | -0.023(.264) |
| Visual-rhMiddleOccipital   | 35  | -77 | 21  | 0.448 | 0.642 | - | 0.76 | -2.45 | -0.061(.225) | -0.051(.235) |
| Visual-rhMiddleOccipital   | 32  | -86 | 2   | 0.56  | 0.735 | - | 0.58 | -2.55 | -0.090(.277) | -0.081(.278) |
| Visual-rhMiddleTemporal    | 44  | -67 | 2   | 0.019 | 0.101 | - | 2.35 | 0     | -0.054(.193) | -0.080(.190) |
| Visual-rhInferiorTemporal  | 47  | -52 | -12 | 0.886 | 0.953 | - | 0.14 | -2.71 | -0.074(.191) | -0.073(.198) |
| Visual-rhMiddleTemporal    | 49  | -54 | 9   | 0.373 | 0.566 | - | 0.89 | -2.34 | -0.005(.187) | -0.015(.190) |
| Visual-rhFusiform          | 31  | -46 | -6  | 0.009 | 0.073 | - | 2.61 | 0.63  | -0.074(.280) | -0.115(.270) |
| Visual-rhFusiform          | 27  | -69 | -7  | 0.47  | 0.67  | - | 0.72 | -2.47 | 0.007(.238)  | -0.003(.242) |
| Visual-rhFusiform          | 35  | -44 | -20 | 0.514 | 0.695 | - | 0.65 | -2.5  | -0.053(.269) | -0.043(.258) |
| Visual-rhCuneus            | 14  | -92 | 15  | 0.704 | 0.84  | - | 0.38 | -2.64 | -0.003(.245) | 0.003(.255)  |
| Visual-rhLingual           | 10  | -74 | -2  | 0.636 | 0.791 | - | 0.47 | -2.62 | 0.069(.275)  | 0.061(.291)  |
| Visual-rhLingual           | 20  | -87 | -7  | 0.618 | 0.78  | - | -0.5 | -2.6  | 0.007(.352)  | -0.003(.322) |
| Visual-rhCuneus            | 5   | -80 | 23  | 0.996 | 0.997 | - | 0.01 | -2.74 | 0.039(.261)  | 0.039(.255)  |
| Visual-rhCuneus            | 15  | -70 | 23  | 0.093 | 0.249 | - | 1.68 | -1.33 | 0.033(.248)  | 0.010(.235)  |

\* = qFDR < .05. Bold = qFDR < .05 or  $\ln(\text{BF}_{10}) > 1.1$ . Note that x, y and z values here refer to the Montreal Neurological Institute (MNI) coordinates at the centroid of each cortical-surface region-of-interest (ROI) of a standard MNI brain. The label for each cortical-surface ROI is based on the Automated Anatomical Labeling (AAL) algorithm<sup>2</sup> via the mni2aal R package (<https://github.com/yunshiuai/label4MRI>). The label for each subcortical-volumetric ROI is based on Freesurfer' segmentation algorithm<sup>3</sup>, applied on each participant's individual brain space. Given that individual brain space was used for subcortical ROIs, their x, y and z coordinates are not given here. \* = qFDR < .05. Bold = qFDR < .05 or  $\ln(\text{BF}_{10}) > 1.1$ . The value of  $\ln(\text{BF}_{10}) > 1.1$  and < -1.2 are interpreted as substantial evidence for the alternative (of there being a difference), and null hypotheses (of there being *no* difference), respectively.

**eTable 14.** Group differences between anhedonia and low-mood during reward-anticipation [Large Reward > Neutral Cue] in the MID task-fMRI activation

| Anhedonia (n= 176) vs. Low-Mood (n= 196) | x          | y         | z         | $\rho$       | $q_{FDR}$    | t           | ln(BF <sub>10</sub> ) | With Anhedonia<br>M(SD) | With Low Mood<br>M(SD) |
|------------------------------------------|------------|-----------|-----------|--------------|--------------|-------------|-----------------------|-------------------------|------------------------|
| Auditory-lhOpercularRolandic             | -36        | -34       | 20        | 0.924        | 0.924        | 0.1         | -2.06                 | -0.067(.277)            | -0.064(.256)           |
| Auditory-lhSuperiorTemporal              | -59        | -30       | 11        | 0.026        | 0.112        | 2.23        | 0.3                   | -0.041(.180)            | 0.005(.180)            |
| Auditory-rhInsula                        | 38         | -12       | 20        | 0.036        | 0.122        | 2.1         | 0.02                  | -0.118(.280)            | -0.052(.281)           |
| CinguloOperc-lhMiddleCingulum            | -8         | 15        | 34        | 0.379        | 0.459        | 0.88        | -1.72                 | 0.016(.206)             | 0.038(.229)            |
| CinguloOperc-rhMiddleCingulum            | 16         | -33       | 43        | 0.391        | 0.459        | 0.86        | -1.74                 | -0.024(.159)            | -0.007(.180)           |
| CinguloOperc-rhMiddleCingulum            | 9          | 4         | 40        | 0.153        | 0.281        | 1.43        | -1.1                  | 0.014(.166)             | 0.041(.175)            |
| CinguloOperc-rhSupraMarginal             | 55         | -27       | 30        | 0.433        | 0.487        | 0.78        | -1.8                  | -0.053(.182)            | -0.037(.196)           |
| Default-lhMedialSuperiorFrontal          | -6         | 55        | 18        | 0.019        | 0.108        | 2.36        | 0.56                  | -0.051(.250)            | 0.012(.232)            |
| Default-rhOrbitalMedialFrontal           | 7          | 48        | -10       | 0.156        | 0.281        | 1.42        | -1.12                 | -0.155(.442)            | -0.083(.462)           |
| Default-rhMedialSuperiorFrontal          | 8          | 54        | 14        | 0.019        | 0.108        | 2.35        | 0.53                  | -0.071(.245)            | -0.007(.239)           |
| DorsalAttn-rhPrecentral                  | 30         | -8        | 47        | 0.322        | 0.415        | 0.99        | -1.62                 | 0.001(.192)             | 0.024(.217)            |
| DorsalAttn-rhSuperiorParietal            | 23         | -66       | 52        | 0.054        | 0.134        | 1.93        | -0.32                 | -0.034(.221)            | 0.014(.232)            |
| <b>FrontoParietal-lhMiddleFrontal</b>    | <b>-38</b> | <b>49</b> | <b>10</b> | <b>0.009</b> | <b>0.108</b> | <b>2.63</b> | <b>1.21</b>           | <b>-0.019(.258)</b>     | <b>0.062(.276)</b>     |
| Salienc-rhAnteriorCingulum               | 8          | 35        | 23        | 0.181        | 0.287        | 1.34        | -1.23                 | 0.022(.258)             | 0.058(.227)            |
| SMhand-lhSuperiorParietal                | -19        | -49       | 65        | 0.254        | 0.361        | 1.14        | -1.46                 | -0.046(.174)            | -0.023(.185)           |
| SMhand-lhPrecuneus                       | -11        | -41       | 65        | 0.013        | 0.108        | 2.51        | 0.9                   | -0.076(.227)            | -0.015(.203)           |
| SMhand-lhPrecentral                      | -20        | -25       | 64        | 0.047        | 0.128        | 1.99        | -0.19                 | -0.041(.190)            | 0.003(.195)            |
| SMhand-rhSupplementaryMotor              | 5          | -17       | 52        | 0.28         | 0.378        | 1.08        | -1.53                 | -0.052(.228)            | -0.023(.254)           |
| SMhand-rhPrecentral                      | 20         | -25       | 65        | 0.568        | 0.613        | 0.57        | -1.93                 | -0.029(.200)            | -0.017(.184)           |
| SMhand-rhPostcentral                     | 39         | -35       | 58        | 0.02         | 0.108        | 2.34        | 0.52                  | -0.063(.187)            | -0.011(.202)           |
| SMhand-rhPostcentral                     | 37         | -26       | 51        | 0.179        | 0.287        | 1.35        | -1.22                 | -0.041(.224)            | -0.005(.246)           |
| SMmouth-lhPostcentral                    | -52        | -8        | 38        | 0.044        | 0.128        | 2.02        | -0.14                 | -0.037(.188)            | 0.006(.195)            |
| SMmouth-lhPostcentral                    | -42        | -12       | 50        | 0.143        | 0.281        | 1.47        | -1.06                 | -0.009(.193)            | 0.024(.206)            |
| SMmouth-rhPrecentral                     | 42         | -11       | 47        | 0.087        | 0.196        | 1.72        | -0.68                 | -0.013(.183)            | 0.022(.180)            |
| Subcortical-lhPutamen                    | NA         | NA        | NA        | 0.212        | 0.317        | 1.25        | -1.35                 | 0.037(.180)             | 0.063(.199)            |
| Visual-lhLingual                         | -22        | -58       | 2         | 0.029        | 0.112        | 2.19        | 0.19                  | -0.114(.367)            | -0.023(.379)           |
| Visual-rhMiddleTemporal                  | 49         | -54       | 9         | 0.592        | 0.615        | 0.54        | -1.96                 | -0.045(.219)            | -0.033(.211)           |

We excluded children who had both anhedonia and low-mood. In these follow-up analyses, we only included the reward-anticipation task-fMRI activation regions that differed [ $q_{FDR} < .05$ ] or  $\ln(BF_{10}) > 1.1$  between children with vs. without anhedonia. \* =  $q_{FDR} < .05$ .

**eTable 15.** Group differences between anhedonia and anxiety during reward-anticipation [Large Reward > Neutral Cue] in the MID task-fMRI activation

| Anhedonia (n= 225) vs. Anxiety (n= 67) | x          | y          | z         | p            | q <sub>FDR</sub> | t           | ln(BF <sub>10</sub> ) | With Anhedonia M(SD) | With Anxiety M(SD) |
|----------------------------------------|------------|------------|-----------|--------------|------------------|-------------|-----------------------|----------------------|--------------------|
| Auditory-lhOpercularRolandic           | -36        | -34        | 20        | 0.035        | 0.069            | 2.13        | 0.26                  | -0.070(.313)         | 0.027(.301)        |
| Auditory-lhSuperiorTemporal            | -59        | -30        | 11        | 0.038        | 0.069            | 2.08        | 0.18                  | -0.038(.195)         | 0.024(.218)        |
| Auditory-rhInsula                      | 38         | -12        | 20        | 0.036        | 0.069            | 2.11        | 0.25                  | -0.109(.275)         | -0.022(.272)       |
| CinguloOperc-lhMiddleCingulum          | -8         | 15         | 34        | 0.142        | 0.172            | 1.47        | -0.82                 | -0.003(.207)         | 0.042(.214)        |
| <b>CinguloOperc-rhMiddleCingulum</b>   | <b>16</b>  | <b>-33</b> | <b>43</b> | <b>0.005</b> | <b>0.023*</b>    | <b>2.82</b> | <b>1.84</b>           | <b>-0.043(.175)</b>  | <b>0.029(.167)</b> |
| <b>CinguloOperc-rhMiddleCingulum</b>   | <b>9</b>   | <b>4</b>   | <b>40</b> | <b>0.005</b> | <b>0.023*</b>    | <b>2.85</b> | <b>1.9</b>            | <b>0.003(.184)</b>   | <b>0.081(.194)</b> |
| <b>CinguloOperc-rhSupraMarginal</b>    | <b>55</b>  | <b>-27</b> | <b>30</b> | <b>0.004</b> | <b>0.023*</b>    | <b>2.93</b> | <b>2.11</b>           | <b>-0.071(.192)</b>  | <b>0.013(.214)</b> |
| Default-lhMedialSuperiorFrontal        | -6         | 55         | 18        | 0.02         | 0.061            | 2.34        | 0.69                  | -0.058(.249)         | 0.027(.241)        |
| Default-rhOrbitalMedialFrontal         | 7          | 48         | -10       | 0.052        | 0.073            | 1.96        | -0.05                 | -0.131(.401)         | -0.021(.304)       |
| Default-rhMedialSuperiorFrontal        | 8          | 54         | 14        | 0.254        | 0.264            | 1.14        | -1.21                 | -0.066(.230)         | -0.027(.204)       |
| DorsalAttn-rhPrecentral                | 30         | -8         | 47        | 0.052        | 0.073            | 1.96        | -0.06                 | -0.008(.217)         | 0.052(.188)        |
| <b>DorsalAttn-rhSuperiorParietal</b>   | <b>23</b>  | <b>-66</b> | <b>52</b> | <b>0.003</b> | <b>0.023*</b>    | <b>3.05</b> | <b>2.45</b>           | <b>-0.036(.217)</b>  | <b>0.060(.194)</b> |
| FrontoParietal-lhMiddleFrontal         | -38        | 49         | 10        | 0.152        | 0.172            | 1.44        | -0.84                 | -0.028(.239)         | 0.024(.222)        |
| Salience-rhAnteriorCingulum            | 8          | 35         | 23        | 0.041        | 0.07             | 2.05        | 0.12                  | 0.024(.246)          | 0.097(.224)        |
| <b>SMhand-lhSuperiorParietal</b>       | <b>-19</b> | <b>-49</b> | <b>65</b> | <b>0.001</b> | <b>0.022*</b>    | <b>3.31</b> | <b>3.21</b>           | <b>-0.054(.171)</b>  | <b>0.032(.174)</b> |
| SMhand-lhPrecuneus                     | -11        | -41        | 65        | 0.358        | 0.358            | 0.92        | -1.43                 | -0.061(.227)         | -0.030(.224)       |
| SMhand-lhPrecentral                    | -20        | -25        | 64        | 0.072        | 0.098            | 1.8         | -0.3                  | -0.025(.195)         | 0.026(.163)        |
| SMhand-rhSupplementaryMotor            | 5          | -17        | 52        | 0.023        | 0.062            | 2.29        | 0.61                  | -0.063(.232)         | 0.014(.195)        |
| SMhand-rhPrecentral                    | 20         | -25        | 65        | 0.209        | 0.226            | 1.26        | -1.09                 | -0.028(.197)         | 0.008(.190)        |
| <b>SMhand-rhPostcentral</b>            | <b>39</b>  | <b>-35</b> | <b>58</b> | <b>0.007</b> | <b>0.029*</b>    | <b>2.7</b>  | <b>1.54</b>           | <b>-0.060(.179)</b>  | <b>0.015(.191)</b> |
| <b>SMhand-rhPostcentral</b>            | <b>37</b>  | <b>-26</b> | <b>51</b> | <b>0.002</b> | <b>0.022*</b>    | <b>3.19</b> | <b>2.85</b>           | <b>-0.047(.212)</b>  | <b>0.058(.227)</b> |
| SMmouth-lhPostcentral                  | -52        | -8         | 38        | 0.098        | 0.126            | 1.66        | -0.55                 | -0.032(.185)         | 0.017(.237)        |
| SMmouth-lhPostcentral                  | -42        | -12        | 50        | 0.044        | 0.07             | 2.03        | 0.08                  | -0.005(.201)         | 0.054(.172)        |
| SMmouth-rhPrecentral                   | 42         | -11        | 47        | 0.153        | 0.172            | 1.43        | -0.87                 | -0.000(.180)         | 0.038(.179)        |
| <b>Subcortical-lhPutamen</b>           | <b>NA</b>  | <b>NA</b>  | <b>NA</b> | <b>0.012</b> | <b>0.042*</b>    | <b>2.52</b> | <b>1.11</b>           | <b>0.030(.184)</b>   | <b>0.099(.176)</b> |
| Visual-lhLingual                       | -22        | -58        | 2         | 0.033        | 0.069            | 2.14        | 0.3                   | -0.089(.369)         | 0.028(.354)        |
| Visual-rhMiddleTemporal                | 49         | -54        | 9         | 0.025        | 0.062            | 2.25        | 0.5                   | -0.060(.216)         | 0.011(.210)        |

We excluded children who had both anhedonia and anxiety. In these follow-up analyses, we only included the reward-anticipation task-fMRI activation regions that differed [qFDR < .05] or ln(BF<sub>10</sub>) > 1.1 between children with vs. without anhedonia. \* = qFDR < .05. Bold = qFDR < .05 or ln(BF<sub>10</sub>) > 1.1.

**eTable 16.** Group differences between anhedonia and ADHD during reward-anticipation [Large Reward > Neutral Cue] in the MID task-fMRI activation

| Anhedonia (n= 192) vs. ADHD (n= 416) | x          | y          | z         | $\rho$       | $q_{FDR}$    | $t$         | $\ln(BF_{10})$ | With Anhedonia $M(SD)$ | With ADHD $M(SD)$  |
|--------------------------------------|------------|------------|-----------|--------------|--------------|-------------|----------------|------------------------|--------------------|
| Auditory-lhOpercularRolandic         | -36        | -34        | 20        | 0.068        | 0.205        | 1.83        | -0.63          | -0.052(.300)           | -0.000(.293)       |
| <b>Auditory-lhSuperiorTemporal</b>   | <b>-59</b> | <b>-30</b> | <b>11</b> | <b>0.004</b> | <b>0.113</b> | <b>2.86</b> | <b>1.69</b>    | <b>-0.041(.191)</b>    | <b>0.016(.216)</b> |
| Auditory-rhInsula                    | 38         | -12        | 20        | 0.178        | 0.268        | 1.35        | -1.38          | -0.083(.256)           | -0.048(.287)       |
| CinguloOperc-lhMiddleCingulum        | -8         | 15         | 34        | 0.36         | 0.441        | 0.92        | -1.85          | 0.019(.207)            | 0.036(.187)        |
| CinguloOperc-rhMiddleCingulum        | 16         | -33        | 43        | 0.272        | 0.387        | 1.1         | -1.67          | -0.024(.177)           | -0.006(.167)       |
| CinguloOperc-rhMiddleCingulum        | 9          | 4          | 40        | 0.638        | 0.662        | 0.47        | -2.15          | 0.024(.185)            | 0.033(.182)        |
| CinguloOperc-rhSupraMarginal         | 55         | -27        | 30        | 0.508        | 0.549        | 0.66        | -2.04          | -0.049(.188)           | -0.038(.182)       |
| Default-lhMedialSuperiorFrontal      | -6         | 55         | 18        | 0.029        | 0.205        | 2.19        | 0.06           | -0.050(.227)           | -0.004(.222)       |
| Default-rhOrbitalMedialFrontal       | 7          | 48         | -10       | 0.152        | 0.268        | 1.43        | -1.25          | -0.116(.416)           | -0.060(.405)       |
| Default-rhMedialSuperiorFrontal      | 8          | 54         | 14        | 0.053        | 0.205        | 1.94        | -0.43          | -0.047(.228)           | -0.004(.237)       |
| DorsalAttn-rhPrecentral              | 30         | -8         | 47        | 0.402        | 0.472        | 0.84        | -1.91          | 0.007(.200)            | 0.023(.205)        |
| DorsalAttn-rhSuperiorParietal        | 23         | -66        | 52        | 0.061        | 0.205        | 1.87        | -0.55          | -0.021(.222)           | 0.016(.202)        |
| FrontoParietal-lhMiddleFrontal       | -38        | 49         | 10        | 0.466        | 0.525        | 0.73        | -1.97          | -0.005(.252)           | 0.014(.279)        |
| Salienc-rhAnteriorCingulum           | 8          | 35         | 23        | 0.307        | 0.414        | 1.02        | -1.74          | 0.030(.261)            | 0.054(.238)        |
| SMhand-lhSuperiorParietal            | -19        | -49        | 65        | 0.159        | 0.268        | 1.41        | -1.28          | -0.045(.180)           | -0.020(.180)       |
| SMhand-lhPrecuneus                   | -11        | -41        | 65        | 0.143        | 0.268        | 1.47        | -1.2           | -0.048(.217)           | -0.020(.197)       |
| SMhand-lhPrecentral                  | -20        | -25        | 64        | 0.333        | 0.429        | 0.97        | -1.78          | -0.003(.199)           | 0.013(.171)        |
| SMhand-rhSupplementaryMotor          | 5          | -17        | 52        | 0.046        | 0.205        | 2           | -0.32          | -0.047(.235)           | -0.004(.224)       |
| SMhand-rhPrecentral                  | 20         | -25        | 65        | 0.718        | 0.718        | 0.36        | -2.17          | -0.012(.194)           | -0.006(.172)       |
| SMhand-rhPostcentral                 | 39         | -35        | 58        | 0.139        | 0.268        | 1.48        | -1.17          | -0.037(.172)           | -0.009(.197)       |
| SMhand-rhPostcentral                 | 37         | -26        | 51        | 0.125        | 0.268        | 1.54        | -1.09          | -0.027(.223)           | 0.007(.233)        |
| <b>SMmouth-lhPostcentral</b>         | <b>-52</b> | <b>-8</b>  | <b>38</b> | <b>0.008</b> | <b>0.113</b> | <b>2.65</b> | <b>1.13</b>    | <b>-0.023(.186)</b>    | <b>0.026(.193)</b> |
| SMmouth-lhPostcentral                | -42        | -12        | 50        | 0.17         | 0.268        | 1.38        | -1.33          | 0.016(.207)            | 0.041(.187)        |
| SMmouth-rhPrecentral                 | 42         | -11        | 47        | 0.063        | 0.205        | 1.86        | -0.57          | 0.008(.170)            | 0.038(.166)        |
| Subcortical-lhPutamen                | NA         | NA         | NA        | 0.132        | 0.268        | 1.51        | -1.15          | 0.047(.172)            | 0.072(.179)        |
| Visual-lhLingual                     | -22        | -58        | 2         | 0.079        | 0.212        | 1.76        | -0.75          | -0.063(.373)           | 0.003(.402)        |
| Visual-rhMiddleTemporal              | 49         | -54        | 9         | 0.041        | 0.205        | 2.05        | -0.22          | -0.052(.225)           | -0.011(.200)       |

We excluded children who had both anhedonia and ADHD. In these follow-up analyses, we only included the reward-anticipation task-fMRI activation regions that differed [ $q_{FDR} < .05$ ] or  $\ln(BF_{10}) > 1.1$  between children with vs. without anhedonia. \* =  $q_{FDR} < .05$ . Bold =  $q_{FDR} < .05$  or  $\ln(BF_{10}) > 1.1$ .

**eTable 17.** Follow-up Analysis

| Anhedonia (n = 154) vs Low-Mood (n = 180) | $p$          | $q_{FDR}$     | $t$           | $\ln(BF_{10})$ | $M(SD)$             |                     |
|-------------------------------------------|--------------|---------------|---------------|----------------|---------------------|---------------------|
|                                           |              |               |               |                | Anhedonia           | Low-Mood            |
| <b>CinguloOpercularBrainStem</b>          | <b>0.01</b>  | <b>0.046*</b> | <b>2.61</b>   | <b>1.149</b>   | <b>-0.002(.102)</b> | <b>0.027(.097)</b>  |
| <b>CinguloParietalBrainStem</b>           | <b>0.012</b> | <b>0.046*</b> | <b>-2.522</b> | <b>0.946</b>   | <b>0.028(.096)</b>  | <b>0.003(.079)</b>  |
| CinguloParietalRightPallidum              | 0.047        | 0.086         | 1.997         | -0.183         | 0.104(.132)         | 0.133(.125)         |
| DorsalAttentionLeftHippocampus            | 0.138        | 0.169         | -1.486        | -1.021         | -0.103(.097)        | -0.120(.101)        |
| RetrosplenialTemporalRightCerebellum      | 0.115        | 0.158         | 1.579         | -0.901         | 0.101(.134)         | 0.126(.145)         |
| SensorimotorHandBrainStem                 | 0.039        | 0.086         | 2.07          | -0.035         | 0.086(.096)         | 0.109(.096)         |
| <b>SensorimotorHandRightHippocampus</b>   | <b>0.017</b> | <b>0.046*</b> | <b>2.405</b>  | <b>0.662</b>   | <b>0.077(.104)</b>  | <b>0.105(.098)</b>  |
| <b>SaliencyleftVentraldc</b>              | <b>0.013</b> | <b>0.046*</b> | <b>-2.486</b> | <b>0.858</b>   | <b>-0.088(.095)</b> | <b>-0.115(.091)</b> |
| WithinCinguloOpercula                     | 0.307        | 0.338         | 1.023         | -1.588         | 0.270(.083)         | 0.279(.071)         |
| WithinRetrosplenialTemporal               | 0.467        | 0.467         | 0.728         | -1.839         | 0.490(.149)         | 0.502(.143)         |
| DefaultDorsalAttention                    | 0.061        | 0.096         | -1.882        | -0.409         | -0.108(.070)        | -0.122(.062)        |

| Anhedonia (n = 190) vs Anxiety (n = 68) | $p$          | $q_{FDR}$    | $t$           | $\ln(BF_{10})$ | $M(SD)$             |                     |
|-----------------------------------------|--------------|--------------|---------------|----------------|---------------------|---------------------|
|                                         |              |              |               |                | Anhedonia           | Anxiety             |
| CinguloOpercularBrainStem               | 0.13         | 0.204        | 1.519         | -0.767         | 0.001(.100)         | 0.023(.088)         |
| CinguloParietalBrainStem                | 0.017        | 0.086        | -2.407        | 0.833          | 0.023(.099)         | -0.011(.096)        |
| CinguloParietalRightPallidum            | 0.372        | 0.46         | 0.895         | -1.489         | 0.105(.141)         | 0.123(.137)         |
| <b>DorsalAttentionLeftHippocampus</b>   | <b>0.005</b> | <b>0.051</b> | <b>-2.857</b> | <b>1.922</b>   | <b>-0.097(.093)</b> | <b>-0.135(.084)</b> |
| RetrosplenialTemporalRightCerebellum    | 0.043        | 0.094        | 2.038         | 0.077          | 0.095(.134)         | 0.134(.131)         |
| SensorimotorHandBrainStem               | 0.564        | 0.621        | 0.577         | -1.701         | 0.076(.096)         | 0.084(.104)         |
| SensorimotorHandRightHippocampus        | 0.641        | 0.641        | 0.466         | -1.753         | 0.072(.102)         | 0.078(.100)         |
| SaliencyleftVentraldc                   | 0.028        | 0.086        | -2.204        | 0.397          | -0.093(.094)        | -0.121(.081)        |
| WithinCinguloOpercula                   | 0.376        | 0.46         | 0.887         | -1.49          | 0.273(.083)         | 0.283(.077)         |
| WithinRetrosplenialTemporal             | 0.031        | 0.086        | 2.166         | 0.319          | 0.483(.152)         | 0.529(.137)         |
| DefaultDorsalAttention                  | 0.101        | 0.185        | -1.647        | -0.599         | -0.109(.059)        | -0.123(.061)        |

| Anhedonia (n = 172) vs ADHD (n = 355)       | $p$          | $q_{FDR}$     | $t$           | $\ln(BF_{10})$ | $M(SD)$             |                     |
|---------------------------------------------|--------------|---------------|---------------|----------------|---------------------|---------------------|
|                                             |              |               |               |                | Anhedonia           | ADHD                |
| <b>CinguloOpercularBrainStem</b>            | <b>0.003</b> | <b>0.007*</b> | <b>2.979</b>  | <b>2.021</b>   | <b>0.004(.100)</b>  | <b>0.034(.107)</b>  |
| <b>CinguloParietalBrainStem</b>             | <b>0.001</b> | <b>0.004*</b> | <b>-3.211</b> | <b>2.71</b>    | <b>0.022(.098)</b>  | <b>-0.008(.097)</b> |
| CinguloParietalRightPallidum                | 0.195        | 0.269         | 1.296         | -1.44          | 0.104(.138)         | 0.122(.141)         |
| DorsalAttentionLeftHippocampus              | 0.14         | 0.221         | -1.476        | -1.189         | -0.109(.100)        | -0.123(.104)        |
| <b>RetrosplenialTemporalRightCerebellum</b> | <b>0.013</b> | <b>0.023*</b> | <b>2.502</b>  | <b>0.766</b>   | <b>0.094(.126)</b>  | <b>0.129(.154)</b>  |
| <b>SensorimotorHandBrainStem</b>            | <b>0.001</b> | <b>0.004*</b> | <b>3.39</b>   | <b>3.271</b>   | <b>0.080(.105)</b>  | <b>0.117(.116)</b>  |
| <b>SensorimotorHandRightHippocampus</b>     | <b>0.001</b> | <b>0.004*</b> | <b>3.328</b>  | <b>3.071</b>   | <b>0.078(.101)</b>  | <b>0.111(.104)</b>  |
| <b>SaliencyleftVentraldc</b>                | <b>0.001</b> | <b>0.004*</b> | <b>-3.28</b>  | <b>2.915</b>   | <b>-0.094(.104)</b> | <b>-0.125(.100)</b> |
| WithinCinguloOpercula                       | 0.444        | 0.444         | 0.767         | -1.965         | 0.277(.076)         | 0.283(.080)         |
| WithinRetrosplenialTemporal                 | 0.335        | 0.368         | 0.966         | -1.802         | 0.491(.140)         | 0.504(.153)         |
| DefaultDorsalAttention                      | 0.237        | 0.289         | -1.185        | -1.578         | -0.112(.067)        | -0.120(.067)        |

Abbreviations: rs-fMRI, resting-state fMRI; M, mean; SD, standard deviation.

Pair-wise comparisons between anhedonia and low-mood, anxiety and ADHD in the rs-fMRI connectivity indices  $z[r]$ . In each comparison, we excluded children who had both anhedonia and the other phenotype, and we only included the rs-fMRI connectivity indices that differed [ $q_{FDR} < .05$ ] or  $\ln(BF_{10}) > 1.1$  between children with vs without anhedonia.

<sup>a</sup> $q_{FDR} < .05$ .

## eReferences

1. Petersen AC, Crockett L, Richards M, Boxer A. A self-report measure of pubertal status: Reliability, validity, and initial norms. *Journal of Youth and Adolescence*. 1988;17(2):117-133.
2. Tzourio-Mazoyer N, Landeau B, Papathanassiou D, et al. Automated Anatomical Labeling of Activations in SPM Using a Macroscopic Anatomical Parcellation of the MNI MRI Single-Subject Brain. *NeuroImage*. 2002;15(1):273-289.
3. Fischl B, Salat DH, Busa E, et al. Whole Brain Segmentation. *Neuron*. 2002;33(3):341-355.
